# Supplementary material for: Crosslinked high-performance anion exchange membranes based on poly(dibenzyl N-methyl piperidine) and pentafluorobenzoyl-substituted SEBS
Source: Royal Society of Chemistry journal article supplement (doi:10.1039/d4ta01677g), 2024-01-01
Supplement: d4ta01677g2.xlsx [file d4ta01677g2.xlsx]

## Sheet: Sheet1
	The data supporting this article have been included as part of the Supplementary Information.
	The following Data are included.
	1	SAXS
	2	Mechanical properties (UTM)
	3	Thermal properties (TGA)
	4	Thermal properties (DSC)
	5	WE Cell (x-PDB-m-F5-SEBS , FAA-3-50, PiperION)
	6	WE Durability (x-PDB-0-F5-SEBS, x-PDB-4-F5-SEBS)

## Sheet: SAXS
	Q value	Log(intensity)	Log(intensity)	Log(intensity)	Log(intensity)
	1/ang	x-PDB-0-F5-SEBS	x-PDB-4-F5-SEBS	x-PDB-8-F5-SEBS	x-PDB-12-F5-SEBS
	0	8.43887	8.50616	8.52435	8.51432
	0.000712093	8.51952	8.4558	8.53419	8.5831
	0.00142	8.49653	8.25952	8.37355	8.40631
	0.00214	8.41134	7.88442	8.04721	8.03885
	0.00285	8.26916	7.43127	7.61847	7.55027
	0.00356	8.05149	7.02057	7.2011	7.10386
	0.00427	7.724	6.66725	6.90104	6.741
	0.00498	7.32256	6.41655	6.67803	6.49924
	0.0057	7.02427	6.22871	6.48773	6.31802
	0.00641	6.82673	6.07317	6.29458	6.16037
	0.00712	6.68043	5.93227	6.11692	6.02588
	0.00783	6.55275	5.82204	5.96226	5.91586
	0.00855	6.44129	5.72075	5.82677	5.81696
	0.00926	6.3404	5.63525	5.71893	5.73388
	0.00997	6.2425	5.57353	5.63379	5.6646
	0.01068	6.15187	5.52538	5.56683	5.61283
	0.01139	6.06309	5.47277	5.50489	5.57673
	0.01211	5.97773	5.40648	5.43536	5.54141
	0.01282	5.89882	5.32059	5.35432	5.49142
	0.01353	5.81318	5.23418	5.26511	5.42436
	0.01424	5.73029	5.15122	5.1848	5.3617
	0.01495	5.65024	5.08372	5.11928	5.30597
	0.01567	5.56648	5.02103	5.06124	5.25573
	0.01638	5.49112	4.96283	5.00652	5.20763
	0.01709	5.41168	4.91109	4.96106	5.15519
	0.0178	5.33106	4.86534	4.91576	5.09625
	0.01851	5.26377	4.82088	4.86973	5.03944
	0.01923	5.20374	4.77912	4.82799	4.98137
	0.01994	5.14726	4.73815	4.78348	4.92022
	0.02065	5.09007	4.69654	4.74607	4.86515
	0.02136	5.03729	4.65549	4.70411	4.80758
	0.02207	4.98633	4.62023	4.67056	4.75587
	0.02279	4.93258	4.58238	4.63266	4.70278
	0.0235	4.87801	4.5472	4.60158	4.65692
	0.02421	4.81882	4.51787	4.56744	4.61504
	0.02492	4.7635	4.48978	4.53651	4.57348
	0.02564	4.70405	4.45719	4.5184	4.5356
	0.02635	4.64605	4.43117	4.48047	4.50043
	0.02706	4.57343	4.3947	4.44088	4.44689
	0.02777	4.51695	4.35299	4.39834	4.405
	0.02848	4.456	4.3014	4.34969	4.34329
	0.0292	4.36872	4.24229	4.28569	4.27596
	0.02991	4.29707	4.16655	4.21205	4.19565
	0.03062	4.22479	4.08293	4.13972	4.11624
	0.03133	4.17355	4.0182	4.05824	4.02263
	0.03204	4.12698	3.92814	3.96946	3.91645
	0.03276	4.08086	3.84739	3.86398	3.80841
	0.03347	4.0474	3.72296	3.7676	3.68735
	0.03418	4.00827	3.62706	3.67697	3.57887
	0.03489	3.97489	3.52763	3.60173	3.48926
	0.0356	3.94339	3.4603	3.55133	3.41464
	0.03632	3.91408	3.40976	3.51268	3.38093
	0.03703	3.8835	3.39672	3.4853	3.37493
	0.03774	3.85715	3.34772	3.46953	3.33041
	0.03845	3.82753	3.31534	3.43996	3.30535
	0.03916	3.78988	3.31869	3.4079	3.28668
	0.03988	3.74788	3.29181	3.39498	3.24871
	0.04059	3.71591	3.28937	3.36624	3.21165
	0.0413	3.67654	3.2982	3.35679	3.1878
	0.04201	3.63054	3.28691	3.32139	3.17056
	0.04273	3.5909	3.30707	3.32077	3.13956
	0.04344	3.5553	3.306	3.2878	3.12156
	0.04415	3.50103	3.30428	3.28758	3.08849
	0.04486	3.46418	3.2982	3.27669	3.09552
	0.04557	3.42435	3.33203	3.25115	3.0461
	0.04629	3.39507	3.35044	3.21985	3.06258
	0.047	3.34953	3.33726	3.18865	3.04493
	0.04771	3.31298	3.33646	3.16406	3.04021
	0.04842	3.28124	3.37694	3.15106	3.0162
	0.04913	3.25472	3.36455	3.14333	3.02653
	0.04985	3.23548	3.35315	3.12872	3.01494
	0.05056	3.20456	3.3032	3.1186	2.99607
	0.05127	3.18867	3.26055	3.09132	2.98272
	0.05198	3.15489	3.20683	3.08529	2.98945
	0.05269	3.13957	3.2222	3.07518	2.96379
	0.05341	3.12193	3.26858	3.04922	2.96942
	0.05412	3.11813	3.27254	3.03141	2.935
	0.05483	3.08519	3.27045	3.02776	2.9345
	0.05554	3.05238	3.27967	3.04297	2.94988
	0.05625	3.03954	3.27623	3.02979	2.96848
	0.05697	3.01624	3.26858	3.00518	2.94645
	0.05768	3.00241	3.2584	3.00475	2.95761
	0.05839	2.98693	3.24353	2.99476	2.96284
	0.0591	2.97535	3.20871	2.97909	2.96142
	0.05982	2.96029	3.1878	2.96661	2.93601
	0.06053	2.93622	3.12287	2.9987	2.94002
	0.06124	2.91656	3.09096	2.96802	2.95085
	0.06195	2.89634	3.04376	2.98453	2.96047
	0.06266	2.88956	3.02612	2.99255	2.94002
	0.06338	2.90987	2.97405	2.97635	2.93702
	0.06409	2.89802	2.9489	2.93651	2.91855
	0.0648	2.88092	2.91751	2.92273	2.90849
	0.06551	2.87078	2.90037	2.88366	2.93752
	0.06622	2.86988	2.90363	2.89487	2.90741
	0.06694	2.88095	2.89487	2.86923	2.93702
	0.06765	2.87178	2.84942	2.8704	2.92788
	0.06836	2.87322	2.84011	2.86392	2.89597
	0.06907	2.87057	2.82866	2.85914	2.88024
	0.06978	2.85678	2.78176	2.81158	2.87795
	0.0705	2.87072	2.82543	2.79588	2.86153
	0.07121	2.86392	2.78888	2.80686	2.88024
	0.07192	2.87146	2.76118	2.79379	2.84011
	0.07263	2.83564	2.77085	2.82413	2.79865
	0.07334	2.84822	2.77887	2.76193	2.84386
	0.07406	2.87786	2.78958	2.76567	2.80686
	0.07477	2.84343	2.81158	2.7348	2.75967
	0.07548	2.83766	2.81558	2.73159	2.7796
	0.07619	2.84566	2.77815	2.74896	2.74194
	0.0769	2.82153	2.77815	2.74663	2.75664
	0.07762	2.81502	2.77085	2.72509	2.74819
	0.07833	2.78813	2.76418	2.74194	2.73878
	0.07904	2.79221	2.8109	2.74586	2.70415
	0.07975	2.77418	2.77232	2.73159	2.68931
	0.08047	2.79449	2.76418	2.74741	2.74819
	0.08118	2.76874	2.73078	2.72673	2.69723
	0.08189	2.7817	2.78176	2.734	2.71096
	0.0826	2.76297	2.71933	2.70842	2.68753
	0.08331	2.77246	2.74586	2.66932	2.68931
	0.08403	2.74087	2.70672	2.70927	2.69108
	0.08474	2.73992	2.6902	2.71096	2.68664
	0.08545	2.74526	2.66932	2.68931	2.6721
	0.08616	2.71714	2.67302	2.73078	2.66839
	0.08687	2.73652	2.60638	2.66932	2.66464
	0.08759	2.7204	2.62531	2.73957	2.6637
	0.0883	2.71995	2.62941	2.67943	2.69548
	0.08901	2.71701	2.59439	2.66558	2.64836
	0.08972	2.68155	2.58433	2.70157	2.64345
	0.09043	2.6985	2.56229	2.70842	2.67394
	0.09115	2.72449	2.55871	2.67761	2.63548
	0.09186	2.69319	2.54777	2.68842	2.62634
	0.09257	2.69154	2.5611	2.69548	2.68215
	0.09328	2.68958	2.49276	2.70501	2.64147
	0.09399	2.6894	2.47567	2.66087	2.62941
	0.09471	2.68535	2.45939	2.69285	2.65225
	0.09542	2.67733	2.51455	2.7348	2.67302
	0.09613	2.68138	2.47712	2.65706	2.60423
	0.09684	2.6809	2.48714	2.716	2.6149
	0.09755	2.69056	2.46835	2.69197	2.62118
	0.09827	2.66765	2.42488	2.71517	2.62737
	0.09898	2.66932	2.42488	2.7185	2.63347
	0.09969	2.69821	2.47857	2.68664	2.64048
	0.1004	2.69307	2.40654	2.69285	2.63448
	0.10111	2.69465	2.46687	2.69373	2.64542
	0.10183	2.6808	2.4133	2.68842	2.63649
	0.10254	2.68062	2.42975	2.69897	2.63949
	0.10325	2.68404	2.45179	2.70243	2.63043
	0.10396	2.68892	2.40483	2.69897	2.65896
	0.10467	2.69434	2.39445	2.72916	2.66745
	0.10539	2.69562	2.47276	2.71684	2.63649
	0.1061	2.67665	2.42488	2.71433	2.66745
	0.10681	2.70877	2.45788	2.70329	2.65128
	0.10752	2.69712	2.43457	2.69373	2.62325
	0.10823	2.70984	2.41996	2.72835	2.64542
	0.10895	2.73888	2.41497	2.68753	2.63949
	0.10966	2.69629	2.45025	2.69548	2.65031
	0.11037	2.72487	2.39967	2.68034	2.63246
	0.11108	2.72633	2.4133	2.67761	2.62531
	0.1118	2.69604	2.40654	2.69373	2.66839
	0.11251	2.69674	2.43136	2.70501	2.6149
	0.11322	2.69627	2.42813	2.6981	2.60638
	0.11393	2.70617	2.43775	2.74351	2.59879
	0.11464	2.69968	2.45332	2.72754	2.65801
	0.11536	2.72122	2.42488	2.7185	2.62531
	0.11607	2.72815	2.40312	2.72591	2.67302
	0.11678	2.71338	2.4216	2.6902	2.64933
	0.11749	2.71628	2.4216	2.69636	2.64444
	0.1182	2.70024	2.37475	2.76864	2.67302
	0.11892	2.70437	2.41996	2.70842	2.61909
	0.11963	2.72103	2.35984	2.71349	2.63347
	0.12034	2.72769	2.3927	2.72181	2.63448
	0.12105	2.74087	2.3483	2.71433	2.6637
	0.12176	2.73382	2.40312	2.74115	2.61595
	0.12248	2.72827	2.42651	2.70927	2.65225
	0.12319	2.74222	2.39445	2.72997	2.67025
	0.1239	2.74154	2.40824	2.734	2.62325
	0.12461	2.74032	2.43457	2.716	2.65896
	0.12532	2.77066	2.46687	2.73719	2.68034
	0.12604	2.76607	2.42651	2.72835	2.63649
	0.12675	2.75231	2.44871	2.71012	2.65128
	0.12746	2.76996	2.4014	2.7364	2.66745
	0.12817	2.75531	2.47276	2.72997	2.64246
	0.12888	2.75106	2.38561	2.71933	2.63448
	0.1296	2.77343	2.37475	2.74507	2.63749
	0.13031	2.78697	2.41162	2.70927	2.71265
	0.13102	2.76995	2.40312	2.71096	2.63649
	0.13173	2.77952	2.4014	2.6981	2.63749
	0.13244	2.78225	2.41162	2.69984	2.62325
	0.13316	2.7946	2.4183	2.72016	2.617
	0.13387	2.79584	2.36922	2.71433	2.62118
	0.13458	2.80781	2.43457	2.70672	2.64246
	0.13529	2.81505	2.40824	2.75051	2.64542
	0.136	2.79309	2.40483	2.71767	2.65992
	0.13672	2.82072	2.39967	2.72754	2.63347
	0.13743	2.83203	2.43933	2.73239	2.63949
	0.13814	2.80304	2.4014	2.7356	2.61909
	0.13885	2.81326	2.33445	2.69461	2.62428
	0.13956	2.81711	2.37475	2.68215	2.62737
	0.14028	2.81097	2.38561	2.73878	2.63548
	0.14099	2.80452	2.44404	2.66276	2.61278
	0.1417	2.80393	2.40654	2.67761	2.617
	0.14241	2.83579	2.34439	2.6721	2.62014
	0.14312	2.83354	2.31597	2.72509	2.61172
	0.14384	2.8272	2.34044	2.67761	2.61066
	0.14455	2.82922	2.40824	2.72754	2.61595
	0.14526	2.83123	2.35793	2.7007	2.55751
	0.14597	2.84765	2.36922	2.68931	2.62118
	0.14668	2.85588	2.3784	2.69636	2.59988
	0.1474	2.84035	2.3784	2.70157	2.60097
	0.14811	2.82749	2.41664	2.68124	2.60959
	0.14882	2.84467	2.38021	2.66652	2.58883
	0.14953	2.83786	2.43136	2.68753	2.56348
	0.15024	2.84213	2.39445	2.68753	2.57519
	0.15096	2.85392	2.36736	2.6721	2.57634
	0.15167	2.836	2.38561	2.65031	2.57054
	0.15238	2.84237	2.40654	2.65128	2.57403
	0.15309	2.83489	2.33846	2.65225	2.53782
	0.1538	2.83264	2.38382	2.67025	2.59218
	0.15451	2.82737	2.38202	2.62839	2.53782
	0.15523	2.82029	2.38382	2.64147	2.57634
	0.15594	2.82797	2.35603	2.64933	2.52504
	0.15665	2.82045	2.33445	2.63347	2.52634
	0.15736	2.819	2.33445	2.62839	2.54777
	0.15807	2.7947	2.38021	2.65801	2.51851
	0.15879	2.83172	2.33244	2.66745	2.53656
	0.1595	2.80747	2.3075	2.61384	2.49831
	0.16021	2.78653	2.34044	2.60746	2.549
	0.16092	2.79343	2.26007	2.58659	2.5092
	0.16163	2.78907	2.33445	2.59106	2.49831
	0.16235	2.79709	2.35603	2.63043	2.54531
	0.16306	2.7807	2.27184	2.63448	2.47129
	0.16377	2.76814	2.34044	2.57519	2.47129
	0.16448	2.75901	2.28103	2.61172	2.48001
	0.16519	2.74423	2.24304	2.55991	2.49554
	0.16591	2.73297	2.26482	2.5966	2.42813
	0.16662	2.73066	2.31597	2.61066	2.5172
	0.16733	2.70953	2.23805	2.56348	2.46389
	0.16804	2.68254	2.32222	2.57403	2.46982
	0.16875	2.68235	2.25042	2.59879	2.46389
	0.16947	2.66965	2.26007	2.59329	2.43775
	0.17018	2.66322	2.26007	2.5611	2.41497
	0.17089	2.64241	2.31387	2.55751	2.45179
	0.1716	2.62505	2.24551	2.58433	2.44716
	0.17231	2.62484	2.25527	2.49415	2.44091
	0.17303	2.58471	2.19033	2.54158	2.4456
	0.17374	2.55806	2.24304	2.52375	2.43136
	0.17445	2.51885	2.24551	2.54654	2.41664
	0.17516	2.53494	2.18184	2.52892	2.43297
	0.17587	2.53298	2.14613	2.54283	2.40312
	0.17659	2.50827	2.16435	2.51055	2.41497
	0.1773	2.47485	2.24304	2.51055	2.38202
	0.17801	2.47065	2.24551	2.49831	2.4456
	0.17872	2.44408	2.19033	2.51455	2.41162
	0.17943	2.40166	2.24304	2.52504	2.3927
	0.18014	2.35783	2.17026	2.51983	2.39794
	0.18086	2.31613	2.15534	2.4456	2.37107
	0.18157	2.289	2.19033	2.48855	2.38021
	0.18228	2.30892	2.15534	2.47712	2.36549
	0.18299	2.28659	2.20683	2.47422	2.3784
	0.1837	2.3179	2.1271	2.47129	2.34439
	0.18442	2.26178	2.10037	2.45332	2.32428
	0.18513	2.20097	2.15836	2.44248	2.36922
	0.18584	2.21477	2.18184	2.45025	2.35025
	0.18655	2.18874	2.14922	2.43297	2.31175
	0.18726	2.18817	2.21219	2.40483	2.30535
	0.18798	2.1664	2.08991	2.40993	2.27875
	0.18869	2.12435	2.14613	2.47422	2.3784
	0.1894	2.10248	2.13033	2.36922	2.32428
	0.19011	2.09485	2.04532	2.43933	2.30103
	0.19082	2.0677	2.15836	2.41664	2.34044
	0.19154	2.03609	2.04139	2.4216	2.27184
	0.19225	2.04582	2.15229	2.39094	2.35603
	0.19296	2.06789	2.08991	2.4014	2.30103
	0.19367	1.97335	2.09342	2.4183	2.27875
	0.19438	1.88749	2.0607	2.3962	2.29226
	0.19509	1.973	2.06446	2.34635	2.30103
	0.19581	1.98722	2.0569	2.34635	2.26007
	0.19652	1.87252	2.03342	2.35218	2.31597
	0.19723	1.8473	2.11059	2.36736	2.14301
	0.19794	1.86224	2.04139	2.35603	2.26951
	0.19865	1.81032	2.08636	2.35603	2.2014
	0.19937	1.79985	1.99123	2.39967	2.21219
	0.20008	1.81204	2.02119	2.35603	2.29226
	0.20079	1.80616	2.03743	2.34635	2.21484
	0.2015	1.65762	2.07918	2.31175	2.22011
	0.20221	1.79648	1.99123	2.29885	2.20952
	0.20293	1.76875	2.02119	2.32015	2.21484
	0.20364	1.67065	2.00432	2.31175	2.30103
	0.20435	1.68994	2.01284	2.3032	2.20412
	0.20506	1.63447	1.95424	2.26245	2.16435
	0.20577	1.69514	2.0086	2.27646	2.24551
	0.20648	1.62348	1.99123	2.30535	2.15229
	0.2072	1.5621	2.0569	2.29003	2.13988
	0.20791	1.59046	1.99123	2.27875	2.19866
	0.20862	1.60286	2.02531	2.28103	2.23045
	0.20933	1.56666	1.94939	2.27416	2.20952
	0.21004	1.45225	1.97772	2.26482	2.23805
	0.21076	1.3703	1.98677	2.29447	2.19866
	0.21147	1.56726	1.91908	2.25527	2.14301
	0.21218	1.60975	1.99564	2.32428	2.13672
	0.21289	1.3952	1.97313	2.25285	2.14613
	0.2136	1.3736	1.94939	2.26717	2.17609
	0.21432	1.36982	1.91381	2.20683	2.12057
	0.21503	1.29138	1.9345	2.26717	2.07188
	0.21574	1.02893	1.98677	2.22789	2.16137
	0.21645	1.32532	1.95424	2.24055	2.13672
	0.21716	0.95159	2.03342	2.17026	2.07555
	0.21787	1.27277	2.02119	2.1959	2.14301
	0.21859	1.26011	1.88649	2.11394	2.16732
	0.2193	1.15624	1.98227	2.1959	2.16435
	0.22001	1.19842	1.94939	2.19033	2.10721
	0.22072	1.1539	1.85126	2.15836	2.1038
	0.22143	1.42129	1.92428	2.16435	2.15534
	0.22215	1.19058	1.83885	2.19312	2.17319
	0.22286	0.90149	1.89209	2.15836	2.10721
	0.22357	1.27336	1.88649	2.18184	2.12385
	0.22428	1.12146	1.95904	2.14922	2.12057
	0.22499	0.90427	1.86923	2.14613	2.14301
	0.2257	1.08457	1.82607	2.233	2.12385
	0.22642	1.02577	1.87506	2.17319	2.13672
	0.22713	--	1.82607	2.16732	2.07555
	0.22784	1.04926	1.86923	2.07188	2.1271
	0.22855	1.09094	1.86923	2.14922	2.12385
	0.22926	0.05079	1.83885	2.04139	2.03743
	0.22998	1.17374	1.93952	2.13672	2.06446
	0.23069	1.08088	1.83251	2.07188	2.07918
	0.2314	0.17857	1.83251	2.05308	2.05308
	0.23211	1.0781	1.85733	2.12385	2.1038
	0.23282	0.97458	1.86332	2.19033	2.02531
	0.23353	0.91521	1.9345	2.1038	2.01284
	0.23425	0.42942	1.90849	2.08279	2.0569
	0.23496	0.91113	1.89209	2.07918	2.10721
	0.23567	0.35747	1.85733	2.08991	2.02531
	0.23638	--	1.78533	2.07188	2.01284
	0.23709	0.50523	1.78533	2.08636	2.02938
	0.23781	-0.17908	1.86332	2.04139	2.08636
	0.23852	0.57867	1.91381	2.03743	2.04532
	0.23923	--	1.91381	2.06446	2.01284
	0.23994	-0.4203	1.87506	2.05308	2.04922
	0.24065	0.8944	1.79239	1.96379	1.97313
	0.24136	--	1.80618	2.07188	1.9345
	0.24208	0.04051	1.95424	2.0569	1.98677
	0.24279	0.77031	1.81291	2.05308	1.99123
	0.2435	0.86653	1.85733	1.99123	1.91908
	0.24421	0.92851	1.72428	2.03342	1.91908
	0.24492	0.41671	1.85126	2.02531	1.98677
	0.24563	0.78333	1.77815	2.04532	2
	0.24635	--	1.85733	2	1.97313
	0.24706	0.69853	1.82607	1.96848	1.95904
	0.24777	0.39031	1.81954	2.04139	1.97772
	0.24848	--	1.85733	1.97313	1.90309
	0.24919	0.01958	1.74819	2.02938	1.97772
	0.24991	0.39926	1.87506	1.9345	1.94939
	0.25062	--	1.90309	2.00432	1.91381
	0.25133	0.32166	1.87506	2	2.02938
	0.25204	--	1.80618	1.97772	1.95904
	0.25275	-0.16306	1.81954	1.95424	1.98677
	0.25346	0.4495	1.83885	1.91381	1.97313
	0.25418	--	1.79934	2	1.95424
	0.25489	--	1.79934	1.95904	1.90309
	0.2556	--	1.86332	2	1.91908
	0.25631	--	1.86923	1.99564	1.92942
	0.25702	0.16316	1.8451	2.03342	1.94939
	0.25773	--	1.86332	2.02531	2.01284
	0.25845	--	1.81954	2	1.89763
	0.25916	--	1.82607	1.95904	1.89763
	0.25987	--	1.79239	1.90849	1.82607
	0.26058	--	1.85733	1.94939	1.77815
	0.26129	--	1.74036	1.92942	1.81291
	0.26201	--	1.85126	1.90309	1.90849
	0.26272	--	1.75587	1.95904	1.87506
	0.26343	--	1.83251	1.95904	1.91381
	0.26414	--	1.75587	1.89209	1.95904
	0.26485	--	1.77815	1.92428	1.93952
	0.26556	--	1.77085	1.90849	1.90849
	0.26628	--	1.74819	1.98677	1.9345
	0.26699	--	1.89763	1.9345	1.81291
	0.2677	0.23347	1.77815	1.8451	1.82607
	0.26841	-0.29526	1.79239	1.88649	1.90309
	0.26912	--	1.6721	1.89209	1.85733
	0.26983	--	1.72428	1.89763	1.96848
	0.27055	--	1.75587	1.87506	1.8451
	0.27126	--	1.716	1.88649	1.88081
	0.27197	--	1.81954	1.89763	1.80618
	0.27268	--	1.81954	1.92942	1.87506
	0.27339	--	1.716	1.92428	1.8451
	0.2741	--	1.76343	1.95904	1.88649
	0.27482	-0.00282	1.72428	1.92428	1.86923
	0.27553	--	1.83251	1.99123	1.95424
	0.27624	--	1.77815	1.88649	1.83885
	0.27695	0.82681	1.6721	1.89209	1.85733
	0.27766	--	1.73239	1.91381	1.90849
	0.27837	0.42068	1.82607	1.95424	1.8451
	0.27909	0.76061	1.76343	1.82607	1.95904
	0.2798	--	1.70757	1.8451	1.75587
	0.28051	0.37148	1.77815	1.83885	1.85126
	0.28122	--	1.78533	1.91381	1.72428
	0.28193	--	1.79934	1.77815	1.86332
	0.28264	--	1.69897	1.83885	1.79934
	0.28336	--	1.78533	1.83885	1.90309
	0.28407	--	1.64345	1.96848	1.87506
	0.28478	--	1.72428	1.86923	1.76343
	0.28549	-0.03807	1.70757	1.93952	1.81291
	0.2862	--	1.73239	1.89209	1.82607
	0.28691	--	1.77085	1.85733	1.86332
	0.28763	--	1.77815	1.85126	1.75587
	0.28834	0.76058	1.73239	1.79934	1.86923
	0.28905	0.46094	1.6721	1.79934	1.80618
	0.28976	--	1.80618	1.79934	1.76343
	0.29047	--	1.76343	1.86332	1.81291
	0.29118	-0.21603	1.65321	1.85126	1.80618
	0.2919	0.70497	1.74036	1.82607	1.81954
	0.29261	--	1.83251	1.89209	1.85733
	0.29332	--	1.80618	1.88649	1.89763
	0.29403	0.80984	1.74036	1.81291	1.88081
	0.29474	--	1.77085	1.74036	1.89763
	0.29545	--	1.76343	1.8451	1.87506
	0.29617	--	1.75587	1.92428	1.87506
	0.29688	--	1.63347	1.83251	1.80618
	0.29759	--	1.66276	1.89763	1.83885
	0.2983	0.7448	1.73239	1.87506	1.85126
	0.29901	--	1.79239	1.6902	1.83885
	0.29972	0.73874	1.6902	1.91908	1.82607
	0.30044	--	1.74036	1.89209	1.82607
	0.30115	--	1.75587	1.79239	1.79239
	0.30186	--	1.72428	1.90309	1.76343
	0.30257	--	1.81291	1.79239	1.78533
	0.30328	0.25211	1.83885	1.83251	1.86332
	0.30399	0.09638	1.68124	1.74036	1.81954
	0.3047	--	1.6902	1.92942	1.86332
	0.30542	0.65368	1.80618	1.83251	1.88649
	0.30613	0.11382	1.79934	1.85733	1.8451
	0.30684	--	1.81954	1.70757	1.78533
	0.30755	0.58987	1.72428	1.80618	1.92428
	0.30826	0.42881	1.72428	1.83251	1.88649
	0.30897	0.25823	1.82607	1.83251	1.69897
	0.30969	-0.02665	1.76343	1.76343	1.78533
	0.3104	-0.13353	1.74036	1.87506	1.81954
	0.31111	--	1.78533	1.80618	1.82607
	0.31182	0.56328	1.64345	1.82607	1.86332
	0.31253	0.57824	1.74819	1.79239	1.75587
	0.31324	0.69149	1.716	1.69897	1.77815
	0.31396	-1.36829	1.79239	1.89763	1.85126
	0.31467	--	1.74036	1.81954	1.85733
	0.31538	0.63338	1.82607	1.80618	1.82607
	0.31609	--	1.73239	1.74819	1.87506
	0.3168	-0.65332	1.64345	1.81291	1.83251
	0.31751	--	1.78533	1.79239	1.88649
	0.31822	--	1.74036	1.88081	1.83251
	0.31894	--	1.74819	1.68124	1.78533
	0.31965	-0.1338	1.80618	1.78533	1.77085
	0.32036	--	1.82607	1.79239	1.86923
	0.32107	0.66819	1.81291	1.83885	1.74036
	0.32178	-0.10457	1.72428	1.79239	1.82607
	0.32249	--	1.6902	1.83251	1.80618
	0.32321	0.37579	1.83885	1.80618	1.81954
	0.32392	0.81317	1.88649	1.81291	1.83251
	0.32463	--	1.81954	1.82607	1.78533
	0.32534	--	1.69897	1.89209	1.68124
	0.32605	0.62549	1.88649	1.69897	1.77815
	0.32676	0.56623	1.87506	1.79239	1.83885
	0.32747	0.33137	1.83885	1.79934	1.89209
	0.32819	0.84133	1.94448	1.89209	1.83885
	0.3289	0.48681	1.8451	1.88649	1.79934
	0.32961	-0.70802	1.77085	1.74036	1.74036
	0.33032	0.56317	1.91908	1.8451	1.78533
	0.33103	0.9095	1.78533	1.75587	1.86332
	0.33174	--	1.89763	1.79239	1.81954
	0.33246	0.13837	1.88649	1.74819	1.73239
	0.33317	0.71349	1.85126	1.716	1.76343
	0.33388	0.63329	1.90309	1.85733	1.83885
	0.33459	0.57516	1.9345	1.69897	1.716
	0.3353	0.76996	1.90309	1.73239	1.75587
	0.33601	0.00692	1.96379	1.72428	1.81291
	0.33672	0.16955	1.92942	1.79934	1.77085
	0.33744	0.69364	1.96379	1.61278	1.66276
	0.33815	0.02826	1.83885	1.74819	1.74819
	0.33886	--	1.91381	1.73239	1.77815
	0.33957	0.77744	1.87506	1.80618	1.77085
	0.34028	0.16189	1.93952	1.69897	1.86923
	0.34099	1.17357	1.90309	1.76343	1.77085
	0.3417	0.8266	1.98227	1.77085	1.6721
	0.34242	1.09701	1.94939	1.75587	1.76343
	0.34313	0.63324	2.0086	1.77085	1.81291
	0.34384	1.12794	2.04532	1.79934	1.80618
	0.34455	1.05002	1.94448	1.74036	1.75587
	0.34526	0.63838	2.0086	1.80618	1.6902
	0.34597	0.33118	2.06446	1.72428	1.79934
	0.34668	0.81989	2.05308	1.77085	1.69897
	0.3474	0.38023	2.04139	1.81291	1.716
	0.34811	0.87669	2.07188	1.62325	1.78533
	0.34882	0.96956	2.07555	1.76343	1.8451
	0.34953	0.90945	2.07918	1.62325	1.77815
	0.35024	--	2.07188	1.68124	1.77815
	0.35095	0.84763	2.04532	1.74819	1.74819
	0.35166	1.08526	2.03743	1.73239	1.8451
	0.35238	0.84286	2.09691	1.716	1.79239
	0.35309	0.9894	2.07188	1.69897	1.79239
	0.3538	0.83803	2.06819	1.79934	1.82607
	0.35451	1.13614	2.16732	1.68124	1.82607
	0.35522	0.8539	2.17898	1.63347	1.82607
	0.35593	1.11187	2.07555	1.65321	1.79239
	0.35664		2.07918	1.83251	1.78533
	0.35736		2.11059	1.716	1.74819
	0.35807		2.10721	1.72428	1.6721
	0.35878		2.20683	1.85126	1.76343
	0.35949		2.18752	1.74819	1.83885
	0.3602		2.12057	1.77815	1.78533
	0.36091		2.1271	1.69897	1.77085
	0.36162		2.1959	1.6902	1.6721
	0.36234		2.19312	1.74036	1.79934
	0.36305		2.18752	1.64345	1.81291
	0.36376		2.18752	1.74819	1.77815
	0.36447		2.21484	1.6721	1.76343
	0.36518		2.22011	1.62325	1.79934
	0.36589		2.15836	1.60206	1.79934
	0.3666		2.2833	1.79239	1.70757
	0.36732		2.18752	1.79934	1.74036
	0.36803		2.16137	1.64345	1.73239
	0.36874		2.24551	1.73239	1.76343
	0.36945		2.19866	1.68124	1.62325
	0.37016		2.24551	1.62325	1.76343
	0.37087		2.17319	1.66276	1.77815
	0.37158		2.22272	1.76343	1.75587
	0.3723		2.26245	1.65321	1.80618
	0.37301		2.25285	1.65321	1.78533
	0.37372		2.22789	1.57978	1.77085
	0.37443		2.26482	1.6721	1.76343
	0.37514		2.2833	1.74036	1.78533
	0.37585		2.29667	1.77085	1.6721
	0.37656		2.24055	1.81954	1.77815
	0.37727		2.26951	1.69897	1.79239
	0.37799		2.27416	1.716	1.72428
	0.3787		2.25285	1.70757	1.716
	0.37941		2.22011	1.716	1.86332
	0.38012		2.24304	1.76343	1.72428
	0.38083		2.29885	1.57978	1.81291
	0.38154		2.16435	1.65321	1.76343
	0.38225		2.26951	1.69897	1.81291
	0.38297		2.29226	1.72428	1.73239
	0.38368		2.26007	1.68124	1.74036
	0.38439		2.27646	1.716	1.68124
	0.3851		2.28103	1.75587	1.77085
	0.38581		2.27416	1.6721	1.6902
	0.38652		2.20683	1.69897	1.80618
	0.38723		2.3032	1.62325	1.69897
	0.38794		2.26007	1.716	1.80618
	0.38866		2.21484	1.57978	1.61278
	0.38937		2.31387	1.72428	1.60206
	0.39008		2.28103	1.66276	1.77815
	0.39079		2.28556	1.62325	1.80618
	0.3915		2.30103	1.61278	1.75587
	0.39221		2.27875	1.60206	1.68124
	0.39292		2.24797	1.57978	1.81954
	0.39363		2.25768	1.6902	1.60206
	0.39435		2.22531	1.6902	1.77085
	0.39506		2.29226	1.69897	1.716
	0.39577		2.27416	1.53148	1.74036
	0.39648		2.25768	1.66276	1.78533
	0.39719		2.31806	1.63347	1.78533
	0.3979		2.22789	1.716	1.77085
	0.39861		2.30535	1.65321	1.77815
	0.39932		2.30963	1.54407	1.8451
	0.40004		2.18469	1.5682	1.74036
	0.40075		2.30963	1.70757	1.75587
	0.40146		2.27184	1.5682	1.6902
	0.40217		2.23553	1.51851	1.77085
	0.40288		2.27875	1.78533	1.716
	0.40359		2.24797	1.5563	1.70757
	0.4043		2.2014	1.57978	1.85733
	0.40501		2.28556	1.716	1.72428
	0.40573		2.22789	1.6721	1.81954
	0.40644		2.25527	1.66276	1.72428
	0.40715		2.21484	1.61278	1.63347
	0.40786		2.21484	1.6721	1.74036
	0.40857		2.233	1.5682	1.79934
	0.40928		2.25042	1.64345	1.69897
	0.40999		2.19033	1.44716	1.83251
	0.4107		2.26482	1.57978	1.74036
	0.41142		2.14922	1.69897	1.6902
	0.41213		2.1959	1.68124	1.79239
	0.41284		2.17026	1.77085	1.77085
	0.41355		2.17026	1.6902	1.75587
	0.41426		2.14301	1.5682	1.74819
	0.41497		2.20952	1.66276	1.80618
	0.41568		2.20412	1.65321	1.74036
	0.41639		2.23805	1.66276	1.6902
	0.4171		2.16435	1.62325	1.716
	0.41782		2.19312	1.66276	1.74036
	0.41853		2.1038	1.62325	1.74036
	0.41924		2.25042	1.6721	1.77815
	0.41995		2.12385	1.69897	1.60206
	0.42066		2.18184	1.66276	1.81291
	0.42137		2.21748	1.66276	1.78533
	0.42208		2.17319	1.59106	1.75587
	0.42279		2.18184	1.6721	1.72428
	0.4235		2.13354	1.73239	1.72428
	0.42422		2.17898	1.63347	1.81954
	0.42493		2.15836	1.51851	1.76343
	0.42564		2.11059	1.61278	1.68124
	0.42635		2.15534	1.53148	1.83251
	--		2.16732	1.65321	1.75587
	--
	--
	--
	--
	--
	--
	--
	--
	--

## Sheet: Mechanical properties
Strain	Stress	Strain	Stress	Strain	Stress	Strain	Stress
%	MPa	%	MPa	%	MPa	%	MPa
x-PDB-0-F5-SEBS	x-PDB-0-F5-SEBS	x-PDB-4-F5-SEBS	x-PDB-4-F5-SEBS	x-PDB-8-F5-SEBS	x-PDB-8-F5-SEBS	x-PDB-12-F5-SEBS	x-PDB-12-F5-SEBS
0	-0.00303	0	0	0	0.00667	0	0
0.045	-0.00303	0.04167	0	0.045	0.00833	0.045	0
0.09	0.01364	0.08833	0	0.09	0.01	0.09	0.02969
0.135	0.11061	0.13333	0.025	0.135	0.05333	0.135	0.16719
0.18	0.29697	0.17833	0.10735	0.18	0.17833	0.18	0.41406
0.225	0.57121	0.22333	0.25	0.225	0.38333	0.225	0.775
0.27	0.9197	0.26833	0.45588	0.27	0.67667	0.27	1.21875
0.315	1.27273	0.31333	0.7	0.315	1.015	0.31667	1.67188
0.36167	1.62576	0.35833	0.96765	0.36167	1.37667	0.36167	2.1375
0.40667	1.97727	0.40333	1.25147	0.40667	1.75833	0.40667	2.60156
0.45167	2.33333	0.44833	1.54706	0.45167	2.15833	0.45167	3.06719
0.49667	2.69091	0.495	1.85588	0.49667	2.57167	0.49667	3.52969
0.54167	3.05152	0.54	2.17206	0.54167	2.995	0.54167	3.9875
0.58667	3.40909	0.585	2.49265	0.58667	3.425	0.58667	4.44688
0.63333	3.76667	0.63	2.81471	0.63167	3.855	0.63167	4.90313
0.67833	4.11818	0.675	3.13382	0.67667	4.285	0.67667	5.35938
0.72333	4.46818	0.72167	3.45	0.72167	4.72167	0.72167	5.8125
0.76833	4.81818	0.76667	3.76618	0.76833	5.15333	0.76667	6.25781
0.81333	5.15909	0.81167	4.08235	0.81333	5.585	0.81167	6.70625
0.85833	5.49848	0.85667	4.39706	0.85833	6.015	0.85667	7.15469
0.90333	5.83333	0.90167	4.71176	0.90333	6.43833	0.90167	7.60156
0.94833	6.16667	0.94667	5.02059	0.94833	6.86667	0.94833	8.05156
0.995	6.50152	0.99167	5.32647	0.99333	7.29667	0.99333	8.49844
1.04	6.83636	1.03667	5.63235	1.03833	7.73	1.03833	8.94375
1.085	7.17424	1.08333	5.93971	1.08333	8.16167	1.08333	9.3875
1.13	7.50909	1.12833	6.24559	1.12833	8.58667	1.12833	9.825
1.175	7.84546	1.17333	6.55294	1.17333	9.01	1.17333	10.2578
1.22	8.17424	1.21833	6.85735	1.22	9.42833	1.21833	10.6844
1.265	8.49849	1.26333	7.16323	1.265	9.83667	1.26333	11.1031
1.31	8.8197	1.30833	7.47059	1.31	10.245	1.30833	11.5125
1.35667	9.13485	1.35333	7.77353	1.355	10.6433	1.35333	11.9125
1.40167	9.44394	1.4	8.075	1.4	11.0317	1.39833	12.3078
1.44667	9.75151	1.445	8.37353	1.445	11.4183	1.445	12.6922
1.49167	10.0455	1.49	8.66618	1.49	11.7917	1.49	13.0719
1.53667	10.3364	1.535	8.95441	1.535	12.155	1.535	13.4484
1.58167	10.6242	1.58	9.23823	1.58	12.515	1.58	13.8187
1.62667	10.9076	1.625	9.5147	1.625	12.865	1.625	14.1859
1.67167	11.1879	1.67	9.78676	1.67167	13.2167	1.67	14.5547
1.71667	11.4636	1.715	10.0544	1.71667	13.5633	1.715	14.9219
1.76333	11.7379	1.76	10.3162	1.76167	13.9117	1.76	15.2906
1.80833	12.0076	1.805	10.5735	1.805	14.2617	1.805	15.6578
1.85167	12.2788	1.85	10.8323	1.85	14.61	1.84833	16.0219
1.895	12.5455	1.89333	11.0912	1.89333	14.9533	1.89333	16.3813
1.94	12.8106	1.93833	11.35	1.93667	15.2917	1.93667	16.7312
1.98333	13.0727	1.98167	11.6088	1.98167	15.6233	1.98167	17.075
2.02667	13.3288	2.025	11.8647	2.025	15.9433	2.025	17.4078
2.07167	13.5803	2.07	12.1162	2.07	16.2583	2.07	17.7297
2.115	13.8273	2.11333	12.3676	2.11333	16.5617	2.11333	18.0422
2.15833	14.0682	2.15667	12.6206	2.15667	16.8583	2.15667	18.3469
2.20167	14.3	2.2	12.8676	2.2	17.145	2.2	18.6453
2.245	14.5258	2.245	13.1132	2.24333	17.4233	2.24167	18.9297
2.28833	14.7439	2.28833	13.35	2.28667	17.6883	2.285	19.2078
2.33167	14.953	2.33	13.5779	2.33	17.9417	2.32833	19.4781
2.375	15.1561	2.37333	13.8044	2.37333	18.1917	2.37	19.7422
2.41833	15.35	2.41667	14.0206	2.415	18.4317	2.415	20.0047
2.46167	15.5394	2.46	14.2353	2.46	18.6667	2.45833	20.2594
2.505	15.7227	2.50333	14.4427	2.50333	18.9	2.50167	20.5125
2.54833	15.903	2.54667	14.6441	2.545	19.125	2.54333	20.7625
2.59	16.0803	2.58833	14.8456	2.58833	19.3483	2.58667	21.0094
2.63333	16.2515	2.63167	15.0427	2.63	19.5717	2.62833	21.2563
2.67667	16.4242	2.675	15.2338	2.67333	19.7917	2.67167	21.4984
2.71833	16.5909	2.71667	15.4279	2.715	20.005	2.715	21.7328
2.76167	16.7591	2.76	15.6191	2.75833	20.215	2.75667	21.9641
2.80333	16.9258	2.80167	15.8059	2.8	20.415	2.8	22.1875
2.84667	17.0879	2.845	16.0015	2.84333	20.6083	2.84167	22.4062
2.88833	17.247	2.88667	16.1926	2.885	20.7967	2.88333	22.6172
2.93	17.4046	2.93	16.3809	2.92833	20.9783	2.92667	22.8172
2.97333	17.553	2.97167	16.5706	2.97167	21.155	2.96833	23.0109
3.01667	17.6985	3.015	16.7515	3.01333	21.325	3.01167	23.1938
3.05833	17.8364	3.05667	16.9309	3.055	21.4833	3.05333	23.3672
3.10167	17.9652	3.1	17.1074	3.09833	21.6367	3.095	23.5375
3.14333	18.0894	3.14167	17.2794	3.14	21.7833	3.13833	23.7
3.185	18.2106	3.185	17.4471	3.18333	21.92	3.18	23.8562
3.22667	18.3288	3.22667	17.6118	3.225	22.05	3.22167	24.0078
3.27	18.4424	3.26833	17.7706	3.26667	22.1717	3.265	24.1516
3.31167	18.5485	3.31	17.925	3.31	22.2883	3.30667	24.2937
3.35333	18.65	3.35333	18.0765	3.35167	22.3983	3.34833	24.4312
3.395	18.7485	3.395	18.2176	3.39333	22.5083	3.39167	24.5594
3.43833	18.8394	3.43833	18.3574	3.43667	22.6133	3.43333	24.6875
3.48	18.9349	3.48	18.4941	3.47833	22.715	3.475	24.8125
3.52167	19.0258	3.52167	18.6279	3.52	22.8167	3.51667	24.9344
3.56333	19.1182	3.56333	18.7632	3.56167	22.9133	3.55833	25.0562
3.60667	19.2076	3.605	18.8897	3.60333	23.005	3.60167	25.1719
3.64833	19.2939	3.64833	19.0176	3.645	23.0983	3.64333	25.2797
3.69	19.3773	3.69	19.1426	3.68833	23.1867	3.685	25.3859
3.73167	19.4561	3.73167	19.2647	3.73	23.2667	3.72667	25.4844
3.77333	19.5333	3.77333	19.3882	3.77167	23.3467	3.76833	25.5766
3.81667	19.6061	3.815	19.5088	3.81333	23.42	3.81167	25.6641
3.85833	19.6758	3.85667	19.6265	3.855	23.485	3.85333	25.7469
3.9	19.7409	3.89833	19.7427	3.89833	23.55	3.895	25.8234
3.94167	19.803	3.94167	19.8574	3.94	23.6083	3.93667	25.9
3.98333	19.8651	3.98333	19.9691	3.98167	23.6633	3.97833	25.9672
4.025	19.9227	4.025	20.0765	4.02333	23.7133	4.02	26.0312
4.06667	19.9803	4.06667	20.1794	4.065	23.7617	4.06167	26.0906
4.10833	20.0333	4.10833	20.2779	4.10667	23.8083	4.10333	26.1484
4.15167	20.0803	4.15	20.3706	4.14833	23.8517	4.14667	26.2047
4.19333	20.1258	4.19167	20.4632	4.19	23.8933	4.18833	26.2609
4.235	20.1682	4.23333	20.5515	4.23333	23.935	4.23	26.3141
4.27667	20.2106	4.275	20.6382	4.275	23.9733	4.27167	26.3641
4.31833	20.2515	4.31667	20.7221	4.31667	24.0117	4.31333	26.4156
4.36	20.2924	4.36	20.8015	4.35833	24.0533	4.355	26.4578
4.40167	20.3318	4.4	20.8809	4.4	24.0867	4.39667	26.5031
4.44333	20.3682	4.44333	20.9618	4.44167	24.1217	4.43833	26.5422
4.485	20.4061	4.485	21.0397	4.48333	24.1533	4.48	26.5781
4.52667	20.4424	4.52667	21.1162	4.525	24.18	4.52167	26.6125
4.56833	20.4788	4.56667	21.1897	4.56667	24.21	4.56333	26.6438
4.61167	20.5121	4.61	21.2632	4.60833	24.2367	4.605	26.6734
4.65333	20.5439	4.65167	21.3324	4.65	24.26	4.64667	26.7
4.695	20.5742	4.69333	21.4029	4.69167	24.2817	4.68833	26.7266
4.73667	20.6	4.735	21.4706	4.735	24.2983	4.73	26.7484
4.77833	20.6258	4.77667	21.5309	4.775	24.3167	4.77167	26.7672
4.82	20.65	4.81833	21.5912	4.81833	24.335	4.81333	26.7844
4.86167	20.6712	4.86	21.6471	4.86	24.35	4.855	26.8
4.90333	20.6939	4.90167	21.7044	4.90167	24.3667	4.89667	26.8141
4.945	20.7167	4.94333	21.7573	4.94333	24.3817	4.93833	26.8297
4.98667	20.7364	4.985	21.8118	4.985	24.3967	4.98167	26.8422
5.02833	20.7545	5.02667	21.8632	5.02667	24.4117	5.02333	26.8547
5.07	20.7742	5.06833	21.9103	5.06833	24.4283	5.065	26.8734
5.11167	20.7909	5.11	21.9559	5.11	24.4467	5.10667	26.8906
5.15333	20.8076	5.15167	21.9985	5.15167	24.4667	5.14833	26.9078
5.195	20.8242	5.19333	22.0382	5.19333	24.485	5.19	26.9266
5.23667	20.8424	5.235	22.0794	5.235	24.5067	5.23167	26.9422
5.27833	20.8636	5.27667	22.1191	5.27667	24.525	5.27333	26.9563
5.32	20.8833	5.31833	22.1603	5.31833	24.55	5.315	26.9672
5.36167	20.9	5.36167	22.2015	5.36	24.5733	5.35667	26.9734
5.40333	20.9182	5.40333	22.2427	5.40167	24.59	5.39833	26.975
5.445	20.9303	5.445	22.2824	5.44333	24.6067	5.44	26.975
5.48833	20.9409	5.485	22.3235	5.485	24.615	5.48167	26.975
5.53	20.9515	5.52667	22.3603	5.52667	24.6233	5.52333	26.9734
5.57167	20.9606	5.57	22.3926	5.56833	24.6283	5.565	26.9719
5.61333	20.9682	5.61167	22.4235	5.61	24.6333	5.60667	26.9672
5.65333	20.9742	5.65333	22.45	5.65167	24.6383	5.64833	26.9656
5.69667	20.9803	5.695	22.4765	5.69333	24.645	5.69	26.9609
5.73833	20.9833	5.73667	22.5015	5.735	24.6533	5.73167	26.9578
5.77833	20.9879	5.77833	22.525	5.77667	24.6583	5.77333	26.9547
5.82	20.9909	5.82	22.5471	5.81833	24.665	5.815	26.9563
5.86167	20.9924	5.86167	22.5647	5.86	24.6733	5.85667	26.9594
5.90333	20.9955	5.90333	22.5824	5.90167	24.685	5.89833	26.9578
5.945	21.0015	5.945	22.5985	5.94333	24.6983	5.94	26.9625
5.98833	21.0061	5.98667	22.6147	5.985	24.71	5.98167	26.9672
6.03	21.0136	6.02833	22.6338	6.02667	24.7233	6.02333	26.975
6.07167	21.0212	6.07	22.6515	6.06833	24.7383	6.065	26.975
6.11167	21.0303	6.11167	22.6676	6.11	24.75	6.10667	26.9797
6.155	21.0409	6.15333	22.6868	6.15167	24.7667	6.14833	26.9828
6.195	21.0515	6.195	22.7088	6.19333	24.78	6.19	26.9812
6.23667	21.0606	6.23667	22.7294	6.235	24.79	6.23167	26.9766
6.27833	21.0697	6.27833	22.75	6.27667	24.7967	6.27333	26.9703
6.32167	21.0773	6.32	22.7662	6.31833	24.8033	6.315	26.9656
6.36333	21.0803	6.36167	22.7838	6.36	24.8067	6.35833	26.9578
6.405	21.0864	6.40333	22.8	6.40167	24.805	6.39833	26.9484
6.44667	21.0879	6.445	22.8118	6.44333	24.8017	6.44167	26.9391
6.48833	21.0864	6.48667	22.8279	6.485	24.795	6.48333	26.9281
6.53	21.0833	6.52833	22.8368	6.52667	24.7917	6.52333	26.9156
6.57	21.0818	6.57	22.8471	6.56833	24.785	6.565	26.9062
6.61333	21.0803	6.61167	22.85	6.61	24.78	6.60833	26.8969
6.65333	21.0758	6.65333	22.8559	6.65167	24.775	6.65	26.8906
6.695	21.0712	6.695	22.8588	6.69333	24.7733	6.69167	26.8875
6.73833	21.0697	6.73667	22.8618	6.735	24.7733	6.73333	26.8813
6.78	21.0727	6.77833	22.8588	6.77667	24.77	6.77333	26.8813
6.82167	21.0742	6.82	22.8588	6.81833	24.7717	6.81667	26.8859
6.86333	21.0758	6.86167	22.8647	6.86	24.7783	6.85833	26.8906
6.90333	21.0818	6.90333	22.8662	6.90167	24.7867	6.9	26.8922
6.945	21.0894	6.945	22.8662	6.94333	24.7917	6.94	26.8953
6.98667	21.0955	6.98667	22.8691	6.985	24.7967	6.98167	26.8969
7.02833	21.1015	7.02833	22.8794	7.02667	24.8017	7.02333	26.8969
7.07	21.1091	7.07	22.8882	7.06833	24.8083	7.065	26.8938
7.11167	21.1151	7.11167	22.8956	7.11	24.8067	7.10667	26.8875
7.15333	21.1197	7.15333	22.9059	7.15167	24.8083	7.14833	26.8828
7.195	21.1227	7.195	22.9118	7.19333	24.81	7.19	26.875
7.23667	21.1288	7.23667	22.9162	7.235	24.8067	7.23167	26.8672
7.27833	21.1303	7.27833	22.9176	7.27667	24.8017	7.27333	26.8578
7.32	21.1303	7.32	22.9206	7.31833	24.795	7.315	26.8484
7.36167	21.1303	7.36167	22.925	7.36	24.79	7.35667	26.8406
7.40333	21.1288	7.40333	22.9265	7.40167	24.7817	7.39833	26.8344
7.445	21.1288	7.445	22.925	7.44333	24.7767	7.44167	26.8281
7.48667	21.1242	7.48667	22.9206	7.485	24.77	7.48333	26.8234
7.52833	21.1197	7.52833	22.9191	7.52667	24.7667	7.525	26.8172
7.57	21.1167	7.57	22.9162	7.56833	24.765	7.56667	26.8141
7.61167	21.1167	7.61167	22.9088	7.61	24.7617	7.60667	26.8125
7.655	21.1167	7.65333	22.9059	7.65167	24.76	7.64833	26.8141
7.69667	21.1167	7.695	22.9074	7.69333	24.7617	7.69	26.8141
7.73833	21.1197	7.73667	22.9074	7.735	24.7633	7.73167	26.8156
7.78	21.1212	7.77833	22.9029	7.77667	24.7617	7.77333	26.8141
7.82167	21.1273	7.82	22.9015	7.81833	24.7617	7.815	26.8172
7.86333	21.1318	7.86167	22.9044	7.86	24.7633	7.85833	26.8172
7.90333	21.1364	7.90333	22.9074	7.90167	24.765	7.89833	26.8156
7.94667	21.1439	7.945	22.9059	7.94333	24.7617	7.94	26.8125
7.98833	21.147	7.98667	22.9088	7.985	24.7633	7.98167	26.8109
8.03	21.15	8.02833	22.9162	8.02667	24.765	8.025	26.8094
8.07167	21.1546	8.07	22.925	8.06833	24.7667	8.065	26.8047
8.11333	21.1561	8.11167	22.9265	8.11	24.7617	8.10667	26.8
8.155	21.1561	8.15333	22.9309	8.15167	24.76	8.14833	26.7937
8.19667	21.1561	8.195	22.9353	8.19333	24.7583	8.19	26.7891
8.23833	21.1576	8.23667	22.9368	8.235	24.7517	8.23167	26.7844
8.28	21.1591	8.27833	22.9338	8.27667	24.745	8.27333	26.7766
8.32	21.1561	8.31833	22.9338	8.31833	24.74	8.315	26.7672
8.36167	21.153	8.36	22.9368	8.36	24.735	8.35667	26.7609
8.405	21.153	8.40167	22.9382	8.40167	24.73	8.39833	26.7531
8.44667	21.1561	8.44333	22.9368	8.44333	24.7233	8.44	26.75
8.48833	21.1546	8.485	22.9338	8.485	24.72	8.48167	26.75
8.53	21.153	8.52833	22.9323	8.52667	24.7233	8.52333	26.7484
8.57167	21.1561	8.57	22.9323	8.56833	24.7233	8.565	26.7453
8.61167	21.1576	8.61167	22.9279	8.61	24.725	8.60667	26.7437
8.655	21.1606	8.65333	22.9279	8.65167	24.73	8.64833	26.7453
8.69667	21.1606	8.695	22.9338	8.69333	24.7367	8.69	26.7437
8.73667	21.1636	8.73667	22.9397	8.735	24.74	8.73167	26.7406
8.77833	21.1667	8.77667	22.9441	8.77667	24.74	8.77333	26.7375
8.82167	21.1697	8.81833	22.9485	8.81833	24.7433	8.81667	26.7344
8.86333	21.1727	8.86167	22.9559	8.86	24.745	8.85667	26.7312
8.905	21.1742	8.90333	22.9618	8.90167	24.745	8.89833	26.7266
8.94667	21.1773	8.945	22.9662	8.94333	24.7417	8.94	26.7203
8.98833	21.1788	8.98667	22.9721	8.985	24.74	8.98167	26.7156
9.03	21.1788	9.02833	22.9779	9.02667	24.7433	9.02333	26.7109
9.07167	21.1803	9.07	22.9809	9.06833	24.7433	9.065	26.7047
9.11333	21.1833	9.11167	22.9794	9.11	24.74	9.10667	26.7
9.155	21.1833	9.15333	22.9765	9.15167	24.74	9.14833	26.7
9.19667	21.1833	9.195	22.9779	9.19333	24.745	9.19	26.6984
9.23833	21.1849	9.23667	22.9721	9.235	24.7483	9.23167	26.6969
9.28	21.1879	9.27833	22.9647	9.27667	24.7517	9.27333	26.6984
9.32167	21.1894	9.32	22.9618	9.31833	24.7533	9.315	26.7016
9.36333	21.1909	9.36167	22.9603	9.36	24.7583	9.35667	26.7047
9.405	21.1939	9.40333	22.9574	9.40167	24.7633	9.39833	26.7031
9.44667	21.2015	9.445	22.9515	9.44333	24.765	9.44	26.7031
9.48833	21.2076	9.48667	22.95	9.485	24.7717	9.48167	26.7031
9.53	21.2136	9.52833	22.95	9.52667	24.775	9.52333	26.7016
9.57167	21.2197	9.57	22.9441	9.56833	24.7783	9.565	26.6969
9.61333	21.2242	9.61167	22.9368	9.61	24.7767	9.60667	26.6938
9.655	21.2288	9.65333	22.9353	9.65167	24.775	9.64833	26.6938
9.69667	21.2273	9.695	22.9382	9.69333	24.7767	9.69	26.6906
9.73833	21.2303	9.73667	22.9353	9.735	24.775	9.73167	26.6859
9.78	21.2303	9.77833	22.9309	9.77667	24.7717	9.77333	26.6812
9.82167	21.2273	9.82	22.9265	9.81833	24.765	9.815	26.6797
9.86333	21.2242	9.86167	22.9265	9.86	24.7617	9.85667	26.6734
9.905	21.2197	9.90333	22.9191	9.90167	24.7567	9.89833	26.6703
9.945	21.2182	9.945	22.9132	9.94333	24.7483	9.94	26.6672
9.98667	21.2136	9.98667	22.9088	9.985	24.7467	9.98167	26.6703
10.0283	21.2106	10.0283	22.9044	10.0283	24.745	10.025	26.6734
10.0717	21.2106	10.07	22.8971	10.07	24.745	10.0667	26.6734
10.1133	21.2121	10.1117	22.8912	10.11	24.745	10.1067	26.6781
10.155	21.2167	10.1533	22.8868	10.1517	24.75	10.1483	26.6859
10.1967	21.2197	10.195	22.8868	10.1933	24.755	10.19	26.6938
10.2383	21.2273	10.2367	22.8868	10.235	24.7617	10.2317	26.7031
10.2783	21.2349	10.2783	22.8882	10.2767	24.7683	10.2733	26.7125
10.32	21.2424	10.32	22.8926	10.3183	24.7767	10.3167	26.7172
10.3617	21.25	10.3617	22.9	10.36	24.785	10.3583	26.7203
10.4033	21.2561	10.4033	22.9074	10.4033	24.79	10.4	26.7203
10.445	21.2636	10.445	22.9088	10.4433	24.7917	10.4417	26.7156
10.4883	21.2651	10.4867	22.9147	10.485	24.7917	10.4833	26.7125
10.5283	21.2667	10.5283	22.9206	10.5267	24.7917	10.525	26.7094
10.57	21.2682	10.57	22.9221	10.5683	24.79	10.565	26.7031
10.6117	21.2697	10.6117	22.9206	10.61	24.7867	10.6067	26.6969
10.6533	21.2667	10.6533	22.9191	10.6517	24.78	10.6483	26.6906
10.695	21.2636	10.695	22.9235	10.6933	24.7733	10.69	26.6844
10.7367	21.2606	10.7367	22.9221	10.735	24.7633	10.7317	26.6797
10.7783	21.2545	10.7783	22.9206	10.7767	24.7583	10.7733	26.6797
10.82	21.2485	10.82	22.9176	10.8183	24.755	10.815	26.6797
10.8617	21.2455	10.8617	22.9162	10.86	24.7583	10.8567	26.6828
10.9033	21.2439	10.9033	22.9118	10.9017	24.7583	10.8983	26.6859
10.945	21.2455	10.9433	22.9059	10.9433	24.7617	10.94	26.6906
10.9867	21.2455	10.9867	22.9015	10.985	24.7683	10.9817	26.6969
11.0283	21.247	11.0283	22.9059	11.0267	24.7783	11.0233	26.7031
11.07	21.253	11.07	22.9059	11.0683	24.7883	11.065	26.7109
11.1117	21.2606	11.1117	22.9044	11.11	24.7967	11.1067	26.7188
11.1533	21.2682	11.1533	22.9103	11.1517	24.8083	11.1483	26.725
11.195	21.2773	11.195	22.9176	11.1933	24.8167	11.19	26.7297
11.2367	21.2833	11.2367	22.9265	11.235	24.8267	11.2317	26.7312
11.2783	21.2864	11.2783	22.9294	11.2767	24.8317	11.2733	26.7297
11.32	21.2894	11.32	22.9368	11.3183	24.8383	11.315	26.7328
11.3633	21.2924	11.3617	22.9456	11.36	24.84	11.3567	26.7297
11.405	21.2939	11.4033	22.9529	11.4017	24.84	11.3983	26.725
11.4467	21.2955	11.445	22.9574	11.4433	24.8383	11.44	26.7156
11.4883	21.2955	11.4867	22.9618	11.485	24.835	11.4817	26.7078
11.53	21.2939	11.5283	22.9662	11.5267	24.8317	11.5233	26.6969
11.5717	21.2894	11.57	22.9691	11.5683	24.8267	11.565	26.6875
11.6133	21.2848	11.6117	22.9662	11.61	24.82	11.6067	26.6781
11.6533	21.2788	11.6533	22.9662	11.6517	24.8117	11.6483	26.6734
11.695	21.2742	11.6933	22.9662	11.6933	24.8067	11.69	26.6672
11.7383	21.2742	11.7367	22.9588	11.735	24.8017	11.7317	26.6609
11.7783	21.2742	11.7767	22.9515	11.7767	24.7967	11.7733	26.6594
11.8217	21.2742	11.8183	22.9441	11.8183	24.795	11.815	26.6625
11.8633	21.2727	11.8617	22.9441	11.86	24.7967	11.8567	26.6672
11.9033	21.2758	11.9033	22.9412	11.9017	24.7983	11.8983	26.6656
11.945	21.2788	11.945	22.9397	11.9433	24.795	11.94	26.6687
11.9867	21.2803	11.9867	22.9412	11.985	24.795	11.9817	26.6719
12.0283	21.2803	12.0283	22.9441	12.0267	24.7983	12.0233	26.675
12.07	21.2818	12.07	22.95	12.0683	24.7967	12.065	26.6719
12.1117	21.2864	12.1117	22.9529	12.11	24.795	12.1067	26.6703
12.1533	21.2894	12.1517	22.9559	12.1517	24.7917	12.1483	26.6719
12.195	21.2879	12.195	22.9603	12.1933	24.7867	12.19	26.6687
12.2367	21.2924	12.2367	22.9632	12.235	24.78	12.2317	26.6625
12.2783	21.2955	12.2783	22.9662	12.2767	24.7667	12.2733	26.6562
12.32	21.2939	12.32	22.9691	12.3183	24.7567	12.315	26.6516
12.3617	21.2909	12.3617	22.9735	12.36	24.745	12.3567	26.6453
12.405	21.2924	12.4033	22.9794	12.4017	24.735	12.3983	26.6406
12.4467	21.2939	12.445	22.9809	12.4433	24.7233	12.4417	26.6359
12.4867	21.2909	12.4867	22.9868	12.485	24.7083	12.4833	26.6313
12.5283	21.2848	12.5283	22.9897	12.5267	24.695	12.525	26.625
12.5717	21.2818	12.57	22.9927	12.5683	24.68	12.565	26.6172
12.6133	21.2788	12.6117	22.9897	12.61	24.6667	12.6083	26.6172
12.655	21.2742	12.6533	22.9897	12.6517	24.6583	12.6483	26.6187
12.6967	21.2712	12.695	22.9941	12.6933	24.645	12.6917	26.6156
12.7383	21.2727	12.7367	22.9971	12.735	24.6333	12.7317	26.6125
12.78	21.2742	12.7783	22.9971	12.7767	24.6233	12.7733	26.6156
12.8217	21.2758	12.82	23.0015	12.8183	24.6117	12.815	26.6172
12.8633	21.2758	12.8617	23.0088	12.86	24.6033	12.8583	26.6156
12.905	21.2788	12.9033	23.0162	12.9017	24.5933	12.9	26.6125
12.9467	21.2818	12.945	23.0176	12.9433	24.585	12.94	26.6109
12.9883	21.2818	12.9867	23.0221	12.985	24.5783	12.9817	26.6125
13.03	21.2788	13.0283	23.0265	13.0267	24.5717	13.0233	26.6078
13.0717	21.2818	13.07	23.0294	13.0683	24.565	13.065	26.6047
13.1133	21.2848	13.1117	23.0338	13.11	24.56	13.1083	26.6
13.155	21.2833	13.1533	23.0353	13.1517	24.5517	13.15	26.5969
13.1967	21.2803	13.195	23.0441	13.1933	24.545	13.1917	26.5938
13.2383	21.2833	13.2367	23.0515	13.235	24.5367	13.2317	26.5906
13.28	21.2848	13.2783	23.0544	13.2767	24.53	13.2733	26.5891
13.3217	21.2803	13.32	23.0618	13.3183	24.5233	13.3167	26.5906
13.3633	21.2773	13.3617	23.0662	13.36	24.5217	13.3567	26.5922
13.405	21.2788	13.4033	23.0676	13.4017	24.5183	13.4	26.5906
13.4467	21.2818	13.445	23.0647	13.4433	24.5183	13.4417	26.5922
13.4883	21.2833	13.4867	23.0603	13.485	24.5183	13.4817	26.5969
13.53	21.2833	13.5283	23.0632	13.5267	24.5217	13.5233	26.6016
13.5717	21.2864	13.57	23.0632	13.5683	24.5267	13.565	26.6031
13.6133	21.2924	13.6117	23.0588	13.6083	24.5317	13.6067	26.6047
13.655	21.2955	13.655	23.0603	13.65	24.5383	13.6483	26.6062
13.695	21.2985	13.6967	23.0691	13.6933	24.5433	13.6917	26.6062
13.7367	21.303	13.7367	23.0765	13.735	24.5483	13.7333	26.6047
13.7783	21.3045	13.7783	23.0809	13.7767	24.5483	13.775	26.6016
13.8217	21.303	13.82	23.0853	13.8183	24.5517	13.8167	26.5984
13.8633	21.3015	13.8617	23.0868	13.86	24.5533	13.8583	26.5953
13.905	21.303	13.9033	23.0882	13.9017	24.5567	13.9	26.5922
13.9467	21.3045	13.9467	23.0868	13.9433	24.5517	13.94	26.5859
13.9883	21.303	13.9883	23.0868	13.985	24.55	13.9817	26.5813
14.0283	21.3	14.03	23.0897	14.025	24.5567	14.0233	26.5766
14.0717	21.2985	14.0717	23.0897	14.0667	24.5533	14.065	26.5719
14.1117	21.2985	14.1133	23.0868	14.1083	24.5533	14.1067	26.5688
14.1533	21.2939	14.1533	23.0868	14.1517	24.5533	14.1483	26.5688
14.195	21.2924	14.1967	23.0897	14.1933	24.5583	14.1917	26.5734
14.2367	21.2924	14.2367	23.0868	14.235	24.5683	14.2317	26.575
14.28	21.2939	14.2783	23.0838	14.2767	24.5767	14.2733	26.5797
14.3217	21.297	14.3217	23.0779	14.3167	24.59	14.315	26.5875
14.3633	21.3015	14.3633	23.075	14.3583	24.6033	14.3567	26.5953
14.405	21.3076	14.405	23.0706	14.4017	24.6167	14.3983	26.6016
14.4467	21.3167	14.4467	23.0662	14.4417	24.63	14.44	26.6078
14.4883	21.3242	14.4867	23.0662	14.4833	24.6433	14.4817	26.6125
14.53	21.3303	14.5283	23.0706	14.525	24.6583	14.525	26.6125
14.57	21.3379	14.57	23.0765	14.5683	24.67	14.5667	26.6125
14.6117	21.3409	14.6117	23.0824	14.61	24.6767	14.6083	26.6078
14.655	21.3439	14.6533	23.0882	14.6517	24.685	14.65	26.6031
14.6967	21.3424	14.695	23.0912	14.6933	24.69	14.6917	26.6
14.7383	21.3409	14.7383	23.0956	14.735	24.6933	14.7333	26.5938
14.78	21.3424	14.7783	23.0926	14.7767	24.6917	14.775	26.5859
14.8217	21.3379	14.8217	23.0912	14.8183	24.695	14.815	26.5797
14.8617	21.3348	14.8633	23.0912	14.86	24.6983	14.8567	26.5719
14.9033	21.3288	14.905	23.0853	14.9017	24.6967	14.9	26.5641
14.945	21.3227	14.945	23.0779	14.9433	24.6967	14.9417	26.5609
14.9867	21.3182	14.9867	23.0691	14.985	24.6967	14.9833	26.5609
15.0283	21.3121	15.0283	23.0618	15.0267	24.705	15.025	26.5641
15.07	21.3121	15.07	23.0559	15.0683	24.7117	15.0667	26.5625
15.1117	21.3136	15.1117	23.05	15.11	24.7217	15.1083	26.5672
15.1533	21.3167	15.1533	23.0471	15.1517	24.7317	15.15	26.575
15.195	21.3227	15.195	23.0456	15.1933	24.7433	15.1917	26.5859
15.2367	21.3318	15.2367	23.0456	15.235	24.7567	15.2333	26.5938
15.2783	21.3394	15.2783	23.0412	15.2767	24.775	15.275	26.6031
15.32	21.347	15.32	23.0426	15.3183	24.7933	15.3167	26.6109
15.3617	21.3545	15.3617	23.0485	15.36	24.8067	15.3583	26.6141
15.4033	21.3606	15.4033	23.0485	15.4017	24.8217	15.4	26.6141
15.445	21.3682	15.445	23.0485	15.4433	24.8283	15.4417	26.6156
15.4867	21.3742	15.4867	23.05	15.485	24.8367	15.4833	26.6187
15.5283	21.3788	15.5283	23.0544	15.5267	24.8433	15.525	26.6172
15.57	21.3833	15.57	23.0573	15.5683	24.8517	15.5667	26.6156
15.6117	21.3833	15.6117	23.0544	15.61	24.855	15.6083	26.6109
15.6533	21.3833	15.6533	23.0573	15.6517	24.8583	15.65	26.6109
15.695	21.3803	15.695	23.0632	15.6933	24.8617	15.6917	26.6062
15.7367	21.3773	15.7367	23.0647	15.735	24.8617	15.7333	26.6031
15.7783	21.3742	15.7783	23.0588	15.7767	24.8583	15.775	26.6
15.82	21.3697	15.82	23.0559	15.8183	24.8583	15.8167	26.5984
15.8617	21.3667	15.8617	23.0588	15.86	24.8633	15.8583	26.5984
15.9033	21.3636	15.9033	23.0544	15.9017	24.8667	15.9	26.6
15.945	21.3636	15.945	23.0485	15.9433	24.87	15.9417	26.6016
15.9867	21.3621	15.9867	23.0397	15.985	24.8767	15.9833	26.6047
16.0283	21.3621	16.0283	23.0382	16.0267	24.885	16.025	26.6109
16.07	21.3636	16.07	23.0353	16.0683	24.8933	16.0667	26.6172
16.1117	21.3682	16.1117	23.0324	16.11	24.9	16.1083	26.6219
16.1533	21.3727	16.1533	23.0338	16.1517	24.91	16.1483	26.6266
16.195	21.3803	16.195	23.0412	16.1933	24.92	16.1917	26.6313
16.2367	21.3864	16.2367	23.0471	16.235	24.9317	16.2333	26.6344
16.2783	21.3939	16.2783	23.0529	16.2767	24.9417	16.275	26.6375
16.32	21.3985	16.32	23.0573	16.3183	24.95	16.3167	26.6406
16.3617	21.403	16.3617	23.0618	16.36	24.9567	16.3583	26.6438
16.4033	21.4076	16.4033	23.0676	16.4017	24.96	16.4	26.6438
16.445	21.4091	16.445	23.0676	16.4433	24.9633	16.4417	26.6422
16.4867	21.4121	16.4867	23.0691	16.485	24.97	16.4833	26.6406
16.5283	21.4106	16.5283	23.075	16.5267	24.9733	16.525	26.6375
16.57	21.4121	16.57	23.075	16.5683	24.9783	16.5667	26.6297
16.6117	21.4136	16.6117	23.0735	16.61	24.9767	16.6083	26.625
16.6533	21.4106	16.6533	23.0721	16.6517	24.975	16.65	26.6234
16.695	21.4091	16.695	23.0735	16.6933	24.9817	16.6917	26.6219
16.7383	21.4091	16.7367	23.0706	16.735	24.9817	16.7333	26.6203
16.78	21.4106	16.7783	23.0662	16.7767	24.985	16.775	26.6219
16.8217	21.4106	16.82	23.0618	16.8183	24.9883	16.8167	26.6234
16.8633	21.4121	16.8617	23.0588	16.86	24.9967	16.8583	26.6266
16.905	21.4152	16.9033	23.0573	16.9017	25.0067	16.9	26.6281
16.945	21.4197	16.945	23.0544	16.9433	25.0133	16.9417	26.6328
16.9883	21.4227	16.9867	23.0559	16.985	25.02	16.9833	26.6359
17.0283	21.4258	17.0283	23.0618	17.0267	25.0283	17.025	26.6391
17.07	21.4303	17.07	23.0632	17.0683	25.035	17.0667	26.6391
17.1117	21.4349	17.1117	23.0647	17.11	25.0417	17.1083	26.6406
17.1533	21.4394	17.1533	23.0662	17.1517	25.0483	17.15	26.6438
17.195	21.4439	17.195	23.0706	17.1933	25.0533	17.1917	26.6453
17.2367	21.4515	17.2367	23.075	17.235	25.0583	17.2333	26.6438
17.2783	21.4561	17.2783	23.0721	17.2767	25.0617	17.275	26.6438
17.32	21.4606	17.3183	23.0735	17.3183	25.0667	17.3167	26.6453
17.3633	21.4606	17.36	23.075	17.36	25.0733	17.3583	26.6469
17.405	21.4621	17.4033	23.075	17.4017	25.08	17.3983	26.6469
17.4467	21.4636	17.445	23.0691	17.4433	25.08	17.4417	26.6469
17.4883	21.4621	17.4867	23.0691	17.485	25.085	17.4833	26.65
17.53	21.4606	17.5283	23.075	17.5267	25.09	17.525	26.6531
17.5717	21.4621	17.57	23.0779	17.5683	25.095	17.5667	26.6547
17.6133	21.4652	17.61	23.075	17.61	25.0967	17.6083	26.6578
17.655	21.4667	17.6533	23.075	17.6517	25.105	17.65	26.6625
17.695	21.4667	17.695	23.0809	17.6933	25.1117	17.6917	26.6656
17.7367	21.4697	17.7367	23.0824	17.735	25.12	17.7317	26.6672
17.78	21.4758	17.7783	23.0794	17.7767	25.13	17.7733	26.6703
17.82	21.4803	17.82	23.0794	17.8183	25.1367	17.815	26.6734
17.8617	21.4849	17.8617	23.0794	17.86	25.1433	17.8567	26.6766
17.9033	21.4909	17.9033	23.0809	17.9017	25.1467	17.9	26.675
17.945	21.4939	17.945	23.075	17.9433	25.15	17.9417	26.6734
17.9883	21.4985	17.985	23.0735	17.985	25.1533	17.9833	26.6734
18.03	21.5	18.0267	23.0765	18.0267	25.1583	18.025	26.6687
18.0717	21.503	18.07	23.075	18.0683	25.1617	18.065	26.6641
18.1133	21.5076	18.1117	23.0765	18.11	25.1617	18.1067	26.6578
18.155	21.5045	18.1533	23.0765	18.1517	25.1617	18.15	26.6547
18.1967	21.5061	18.195	23.0794	18.1933	25.1617	18.1917	26.65
18.2383	21.5061	18.2367	23.0765	18.235	25.1617	18.2333	26.6453
18.28	21.5076	18.2783	23.0735	18.2767	25.1567	18.275	26.6422
18.32	21.5076	18.32	23.0706	18.3183	25.1567	18.3167	26.6422
18.3633	21.5076	18.3617	23.0676	18.36	25.1633	18.3583	26.6438
18.405	21.5091	18.4033	23.0632	18.4017	25.17	18.4	26.6422
18.4467	21.5136	18.445	23.0588	18.4433	25.1767	18.4417	26.6422
18.4883	21.5182	18.4867	23.0588	18.485	25.185	18.4833	26.6469
18.53	21.5227	18.5283	23.0559	18.5267	25.1917	18.5233	26.6531
18.5717	21.5288	18.57	23.05	18.5683	25.2017	18.565	26.6547
18.6117	21.5394	18.6117	23.0441	18.61	25.2117	18.6067	26.6578
18.6533	21.547	18.6533	23.0412	18.6517	25.2217	18.6483	26.6594
18.695	21.5561	18.695	23.0471	18.6933	25.2333	18.69	26.6594
18.7367	21.5621	18.7367	23.0471	18.735	25.24	18.7317	26.6562
18.7783	21.5667	18.7783	23.0471	18.7767	25.2417	18.7733	26.6516
18.82	21.5697	18.82	23.0544	18.8183	25.245	18.815	26.6484
18.8617	21.5727	18.86	23.0603	18.86	25.2467	18.8567	26.6422
18.9033	21.5773	18.9033	23.0632	18.9017	25.2467	18.8983	26.6375
18.945	21.5803	18.945	23.0618	18.9433	25.2433	18.94	26.6328
18.9883	21.5818	18.9867	23.0603	18.985	25.2417	18.9817	26.6281
19.0283	21.5818	19.0283	23.0618	19.0267	25.245	19.0233	26.6234
19.0717	21.5818	19.07	23.0573	19.0683	25.2483	19.065	26.6187
19.1133	21.5818	19.1117	23.0559	19.11	25.2467	19.1083	26.6187
19.155	21.5803	19.1533	23.0529	19.1517	25.2483	19.15	26.6203
19.1967	21.5773	19.195	23.05	19.1933	25.2533	19.1917	26.6281
19.2383	21.5773	19.2367	23.0456	19.235	25.26	19.2333	26.6359
19.28	21.5773	19.2767	23.0397	19.2767	25.2667	19.2733	26.6453
19.3217	21.5818	19.32	23.0324	19.3183	25.2733	19.315	26.6578
19.3633	21.5848	19.3617	23.0309	19.36	25.285	19.3567	26.6641
19.4033	21.5939	19.4033	23.0294	19.4017	25.2983	19.3983	26.6734
19.4467	21.6015	19.445	23.025	19.4433	25.3083	19.44	26.6828
19.4883	21.6076	19.4867	23.025	19.485	25.3233	19.4817	26.6906
19.5283	21.6136	19.5283	23.0353	19.5267	25.3367	19.5233	26.6984
19.57	21.6182	19.5683	23.0426	19.5683	25.3467	19.565	26.7
19.6117	21.6227	19.6117	23.0485	19.61	25.355	19.6067	26.7016
19.655	21.6258	19.6517	23.0544	19.6517	25.3633	19.6483	26.7063
19.695	21.6258	19.6933	23.0603	19.6933	25.3683	19.6917	26.7063
19.7383	21.6273	19.7367	23.0647	19.735	25.3717	19.7317	26.7031
19.78	21.6303	19.7767	23.0676	19.7767	25.3733	19.7733	26.6984
19.8217	21.6273	19.8183	23.0721	19.8183	25.3733	19.815	26.6984
19.8617	21.6242	19.8617	23.0721	19.86	25.375	19.8567	26.6953
19.905	21.6197	19.9033	23.0706	19.9017	25.3733	19.8983	26.6906
19.9467	21.6182	19.945	23.0647	19.9433	25.37	19.94	26.6906
19.9867	21.6151	19.9867	23.0603	19.985	25.3633	19.9833	26.6938
20.0283	21.6091	20.0283	23.0559	20.0267	25.36	20.025	26.6984
20.07	21.6061	20.07	23.0529	20.0683	25.3533	20.0667	26.7016
20.1117	21.6045	20.1117	23.0471	20.11	25.3483	20.1083	26.7109
20.155	21.6	20.1533	23.0471	20.1517	25.3483	20.1483	26.7188
20.195	21.5985	20.195	23.0485	20.1933	25.3533	20.1917	26.7266
20.2383	21.6	20.2367	23.0485	20.235	25.36	20.2333	26.7359
20.28	21.6015	20.2783	23.0441	20.2767	25.3617	20.275	26.7453
20.32	21.6015	20.32	23.0441	20.3183	25.3683	20.3167	26.7547
20.3617	21.6	20.3617	23.05	20.36	25.3717	20.3583	26.7625
20.4033	21.603	20.4033	23.0529	20.4017	25.3767	20.4	26.7703
20.445	21.6061	20.445	23.0573	20.4433	25.375	20.4417	26.7766
20.4883	21.6076	20.4867	23.0618	20.485	25.375	20.4833	26.7797
20.53	21.6076	20.5283	23.0647	20.5267	25.3767	20.525	26.7844
20.5717	21.6091	20.57	23.0676	20.5683	25.3733	20.5667	26.7875
20.6133	21.6106	20.6117	23.0676	20.61	25.37	20.6083	26.7891
20.655	21.6091	20.6533	23.0676	20.6517	25.365	20.65	26.7937
20.6967	21.603	20.695	23.0706	20.6933	25.3617	20.69	26.7937
20.7383	21.597	20.7367	23.0735	20.735	25.355	20.7333	26.7922
20.7783	21.5909	20.7783	23.0721	20.7767	25.35	20.775	26.7922
20.82	21.5818	20.82	23.0735	20.8183	25.3467	20.8167	26.7937
20.8617	21.5742	20.8617	23.0779	20.8617	25.3433	20.8583	26.7969
20.9033	21.5636	20.9033	23.0765	20.9033	25.3433	20.9	26.7984
20.9467	21.5545	20.9433	23.0721	20.9433	25.34	20.94	26.8031
20.9883	21.5439	20.9867	23.0706	20.985	25.34	20.9817	26.8109
21.03	21.5364	21.0283	23.0735	21.0267	25.345	21.0233	26.8188
21.0717	21.5318	21.07	23.0735	21.0683	25.3483	21.065	26.8219
21.1133	21.5288	21.1117	23.0706	21.11	25.3483	21.1067	26.8297
21.1533	21.5242	21.1533	23.0721	21.1517	25.35	21.1483	26.8344
21.1967	21.5212	21.195	23.0721	21.1933	25.355	21.19	26.8406
21.2367	21.5212	21.235	23.0706	21.235	25.3583	21.2317	26.8469
21.28	21.5197	21.2783	23.0691	21.2783	25.3583	21.2733	26.8547
21.3217	21.5167	21.3183	23.0691	21.32	25.3617	21.315	26.8609
21.3633	21.5106	21.36	23.0735	21.36	25.365	21.3567	26.8641
21.405	21.503	21.4017	23.0779	21.4033	25.3683	21.3983	26.8641
21.4467	21.497	21.4433	23.0838	21.445	25.3667	21.44	26.8609
21.4883	21.4924	21.4867	23.0897	21.4867	25.37	21.4817	26.8609
21.53	21.4894	21.5283	23.0956	21.5283	25.3733	21.5233	26.8609
21.5717	21.4849	21.57	23.1015	21.57	25.3733	21.565	26.8578
21.6133	21.4818	21.6117	23.1044	21.61	25.3683	21.6067	26.8562
21.655	21.4788	21.6533	23.1103	21.6533	25.3683	21.65	26.8578
21.6967	21.4727	21.6933	23.1147	21.695	25.3733	21.6917	26.8609
21.7383	21.4712	21.735	23.1162	21.7367	25.375	21.7333	26.8609
21.78	21.4697	21.7783	23.1118	21.7783	25.3733	21.775	26.8625
21.8217	21.4667	21.82	23.1044	21.82	25.3783	21.8167	26.8656
21.8633	21.4652	21.8617	23.1059	21.86	25.3833	21.8583	26.8719
21.905	21.4652	21.9033	23.1015	21.9017	25.39	21.9	26.875
21.9467	21.4682	21.945	23.0971	21.9433	25.395	21.94	26.8797
21.9883	21.4652	21.9867	23.0971	21.985	25.4033	21.9817	26.8844
22.03	21.4652	22.0283	23.1029	22.0267	25.4117	22.025	26.8859
22.0717	21.4652	22.07	23.1103	22.0683	25.4183	22.065	26.8859
22.1133	21.4667	22.1117	23.1132	22.11	25.4217	22.1083	26.8844
22.155	21.4636	22.1517	23.1191	22.1517	25.4267	22.1483	26.8844
22.1967	21.4621	22.195	23.1265	22.1933	25.43	22.1917	26.8797
22.2383	21.4636	22.2367	23.1294	22.235	25.4317	22.2333	26.8766
22.28	21.4606	22.2783	23.1265	22.2767	25.4283	22.2733	26.8719
22.3217	21.4591	22.32	23.1309	22.3183	25.4283	22.3167	26.8703
22.3633	21.4546	22.3617	23.1368	22.36	25.4333	22.3567	26.8656
22.405	21.45	22.4033	23.1338	22.4017	25.4317	22.4	26.8609
22.4467	21.447	22.445	23.1279	22.4433	25.4283	22.4417	26.8594
22.4883	21.4409	22.4867	23.1235	22.485	25.4283	22.4833	26.8609
22.53	21.4379	22.5283	23.1235	22.5267	25.4333	22.525	26.8625
22.5717	21.4379	22.57	23.1177	22.5683	25.4383	22.5667	26.8625
22.6133	21.4379	22.6117	23.1118	22.61	25.445	22.6083	26.8656
22.655	21.4379	22.6533	23.1118	22.6517	25.4533	22.6483	26.8719
22.6967	21.4364	22.695	23.1147	22.6933	25.465	22.69	26.8734
22.7383	21.4394	22.7367	23.1191	22.735	25.4783	22.7333	26.8734
22.78	21.4424	22.7783	23.1206	22.7767	25.4933	22.7733	26.8719
22.82	21.4485	22.82	23.1265	22.8183	25.5067	22.815	26.875
22.8633	21.453	22.8617	23.1338	22.86	25.52	22.8567	26.8734
22.9033	21.4606	22.9033	23.1426	22.9017	25.5317	22.8983	26.8687
22.9467	21.4667	22.945	23.1471	22.9433	25.54	22.94	26.8594
22.9883	21.4697	22.9867	23.1529	22.985	25.5483	22.9817	26.85
23.03	21.4712	23.0283	23.1588	23.0267	25.555	23.025	26.8375
23.0717	21.4742	23.07	23.1632	23.0683	25.5617	23.065	26.8188
23.1133	21.4742	23.1117	23.1603	23.11	25.565	23.1083	26.7937
23.155	21.4727	23.1533	23.1574	23.1517	25.5717	23.15	26.7594
23.1967	21.4682	23.195	23.1574	23.1933	25.5733	23.1917	26.7047
23.2367	21.4682	23.2367	23.1529	23.235	25.5767
23.2783	21.4667	23.2783	23.1441	23.2767	25.58
23.32	21.4652	23.32	23.1412	23.3183	25.585
23.3617	21.4621	23.3617	23.1412	23.36	25.595
23.4033	21.4621	23.4033	23.1368	23.4017	25.6033
23.445	21.4652	23.445	23.1323	23.4433	25.615
23.4883	21.4667	23.4867	23.1279	23.485	25.6283
23.53	21.4697	23.5283	23.1279	23.5267	25.6417
23.5717	21.4758	23.57	23.1279	23.5683	25.6583
23.6133	21.4879	23.6117	23.1221	23.61	25.675
23.6533	21.5	23.6533	23.1235	23.6517	25.6917
23.695	21.5121	23.695	23.1294	23.6933	25.7083
23.7367	21.5227	23.7367	23.1353	23.735	25.7233
23.7783	21.5348	23.7783	23.1338	23.7767	25.7333
23.82	21.5424	23.82	23.1323	23.8183	25.745
23.8633	21.55	23.8617	23.1353	23.86	25.7517
23.905	21.5591	23.9033	23.1338	23.9017	25.7567
23.945	21.5651	23.945	23.1279	23.9433	25.76
23.9883	21.5712	23.9867	23.1279	23.985	25.765
24.03	21.5742	24.0283	23.1309	24.0267	25.7717
24.0717	21.5803	24.07	23.1294	24.0683	25.775
24.1133	21.5833	24.1117	23.125	24.11	25.7733
24.155	21.5864	24.1533	23.1221	24.1517	25.7767
24.195	21.5879	24.195	23.1221	24.1933	25.7817
24.2383	21.5879	24.2367	23.1162	24.235	25.7833
24.28	21.5924	24.2783	23.1132	24.2767	25.7867
24.32	21.5985	24.32	23.1059	24.3183	25.79
24.3633	21.603	24.3617	23.1015	24.36	25.7967
24.405	21.6106	24.4033	23.0956	24.4017	25.805
24.445	21.6167	24.445	23.0882	24.4433	25.8133
24.4867	21.6258	24.4867	23.0868	24.485	25.8233
24.5283	21.6333	24.5283	23.0912	24.5267	25.8333
24.57	21.6424	24.57	23.0868	24.5683	25.84
24.6117	21.6515	24.6117	23.0824	24.61	25.845
24.655	21.6576	24.6533	23.0794	24.6517	25.85
24.695	21.6636	24.695	23.0824	24.6933	25.855
24.7383	21.6697	24.7367	23.0824	24.735	25.8617
24.78	21.6773	24.7783	23.0779	24.7767	25.86
24.82	21.6818	24.82	23.0809	24.8183	25.865
24.8633	21.6864	24.8617	23.0853	24.86	25.8683
24.9033	21.6909	24.9033	23.0853	24.9017	25.8667
24.9467	21.6955	24.945	23.0809	24.9433	25.8617
24.9867	21.697	24.9867	23.0794	24.985	25.8583
25.03	21.7015	25.0283	23.0809	25.0283	25.86
25.0717	21.7076	25.07	23.0765	25.07	25.86
25.1117	21.7121	25.1117	23.0721	25.11	25.8567
25.155	21.7182	25.1533	23.0676	25.1517	25.8583
25.1967	21.7227	25.1967	23.0662	25.1933	25.865
25.2383	21.7288	25.2383	23.0632	25.2367	25.8733
25.2783	21.7364	25.2783	23.0588	25.2783	25.8817
25.32	21.7455	25.32	23.0529	25.3183	25.8883
25.3617	21.7515	25.3617	23.0515	25.36	25.895
25.4033	21.7576	25.4033	23.0471	25.4033	25.9
25.4467	21.7606	25.445	23.0426	25.445	25.9033
25.4883	21.7651	25.4867	23.0426	25.4867	25.9067
25.53	21.7682	25.5283	23.0471	25.5283	25.9083
25.5717	21.7727	25.57	23.0515	25.57	25.91
25.6133	21.7788	25.6117	23.0515	25.6117	25.9083
25.6533	21.7833	25.6533	23.0559	25.6533	25.9083
25.695	21.7864	25.695	23.0588	25.695	25.91
25.7367	21.7924	25.7367	23.0603	25.7367	25.9117
25.7783	21.7955	25.7783	23.0588	25.7783	25.9117
25.82	21.7924	25.82	23.0603	25.82	25.9117
25.8617	21.7909	25.8617	23.0647	25.8617	25.9133
25.9033	21.7939	25.9033	23.0647	25.9033	25.915
25.9467	21.7985	25.945	23.0647	25.945	25.915
25.9867	21.8	25.9867	23.0632	25.9867	25.9183
26.03	21.8015	26.0283	23.0632	26.0283	25.9233
26.0717	21.8091	26.07	23.0618	26.07	25.93
26.1133	21.8151	26.1117	23.0603	26.1117	25.935
26.155	21.8212	26.1533	23.0603	26.1533	25.94
26.1967	21.8288	26.195	23.0662	26.195	25.945
26.2383	21.8364	26.2367	23.0721	26.2367	25.95
26.28	21.8455	26.2783	23.0779	26.2783	25.9533
26.3217	21.85	26.32	23.0838	26.32	25.955
26.3633	21.853	26.3617	23.0912	26.3617	25.9567
26.405	21.8561	26.4033	23.1	26.4033	25.9583
26.4467	21.8576	26.445	23.1029	26.445	25.9583
26.4883	21.8545	26.4867	23.1088	26.4867	25.96
26.53	21.8515	26.5283	23.1147	26.5283	25.96
26.5717	21.853	26.57	23.1162	26.57	25.9567
26.6133	21.8545	26.6117	23.1118	26.61	25.95
26.6533	21.853	26.6533	23.1059	26.6533	25.945
26.695	21.8515	26.695	23.1088	26.695	25.95
26.7367	21.8545	26.7367	23.1015	26.735	25.95
26.7783	21.8576	26.7783	23.0956	26.7783	25.9483
26.8217	21.8621	26.82	23.0956	26.82	25.9533
26.8617	21.8667	26.8617	23.0985	26.86	25.9617
26.9033	21.8712	26.9033	23.1015	26.9017	25.97
26.945	21.8803	26.945	23.1015	26.9433	25.975
26.9867	21.8879	26.9867	23.1103	26.985	25.98
27.0283	21.897	27.0283	23.1162	27.0267	25.9883
27.07	21.9061	27.07	23.1265	27.0683	25.9917
27.1117	21.9106	27.1117	23.1323	27.11	25.9917
27.1533	21.9152	27.1533	23.1397	27.1517	25.9917
27.195	21.9197	27.195	23.1471	27.1933	25.9933
27.2367	21.9242	27.2367	23.1544	27.235	25.99
27.28	21.9273	27.2783	23.1529	27.2767	25.9867
27.3217	21.9288	27.32	23.1515	27.3183	25.9817
27.3633	21.9288	27.3617	23.1544	27.36	25.9783
27.405	21.9273	27.4033	23.1515	27.4017	25.9733
27.4467	21.9258	27.445	23.1412	27.4433	25.9667
27.4867	21.9227	27.4867	23.1397	27.485	25.9583
27.5283	21.9197	27.5283	23.1456	27.5267	25.9517
27.5717	21.9167	27.57	23.1456	27.5683	25.9433
27.6133	21.9167	27.6117	23.1412	27.61	25.93
27.655	21.9167	27.6533	23.1397
27.6967	21.9197	27.695	23.1441
27.7383	21.9242	27.7367	23.1456
27.78	21.9318	27.7783	23.1441
27.8217	21.9409	27.82	23.1471
27.8633	21.9485	27.8617	23.1515
27.905	21.9561	27.9033	23.1574
27.9467	21.9652	27.945	23.1574
27.9883	21.9697	27.9867	23.1647
28.03	21.9727	28.0267	23.1735
28.0717	21.9758	28.07	23.1809
28.1133	21.9803	28.1117	23.1809
28.155	21.9803	28.1533	23.1882
28.1967	21.9788	28.195	23.1956
28.2383	21.9818	28.2367	23.2015
28.28	21.9833	28.2783	23.2015
28.32	21.9803	28.32	23.2088
28.3617	21.9758	28.3617	23.2118
28.405	21.9758	28.4017	23.2118
28.4467	21.9788	28.4433	23.2088
28.4883	21.9788	28.485	23.2088
28.53	21.9788	28.5283	23.2118
28.5717	21.9818	28.57	23.2118
28.6133	21.9879	28.6117	23.2088
28.655	21.9924	28.6533	23.2074
28.6967	21.9985	28.695	23.2132
28.7383	22.0076	28.7367	23.2132
28.78	22.0136	28.7783	23.2162
28.8217	22.0182	28.82	23.2176
28.8633	22.0227	28.8617	23.225
28.905	22.0258	28.9033	23.2338
28.9467	22.0318	28.945	23.2368
28.9883	22.0348	28.9867	23.2441
29.03	22.0379	29.0283	23.2515
29.0717	22.0439	29.07	23.2588
29.1133	22.0455	29.1117	23.2588
29.1533	22.0455	29.1533	23.2603
29.1967	22.0439	29.195	23.2647
29.2383	22.0455	29.2367	23.2618
29.28	22.0485	29.2783	23.2573
29.3217	22.0485	29.32	23.2573
29.3633	22.0515	29.3617	23.2603
29.405	22.053	29.4033	23.2618
29.4467	22.0591	29.445	23.2603
29.4883	22.0621	29.4867	23.2647
29.53	22.0667	29.5283	23.2691
29.5717	22.0712	29.5683	23.2735
29.6133	22.0742	29.6117	23.2779
29.655	22.0773	29.6517	23.2824
29.6967	22.0773	29.695	23.2882
29.7383	22.0803	29.7367	23.2941
29.78	22.0833	29.7783	23.2971
29.8217	22.0833	29.82	23.2985
29.8633	22.0848	29.8617	23.2985
29.905	22.0894	29.9033	23.3
29.9467	22.0939	29.945	23.2956
29.9867	22.097	29.9867	23.2956
30.03	22.1	30.0283	23.2956
30.0717	22.1045	30.07	23.2941
30.1133	22.1091	30.1117	23.2912
30.155	22.1136	30.1533	23.2897
30.1967	22.1182	30.195	23.2926
30.2383	22.1242	30.2367	23.2912
30.28	22.1333	30.2783	23.2868
30.3217	22.1409	30.32	23.2868
30.3633	22.1485	30.3617	23.2926
30.405	22.1546	30.4033	23.2956
30.4467	22.1561	30.445	23.2912
30.4883	22.1591	30.4867	23.2912
30.53	22.1606	30.5283	23.2971
30.5717	22.1636	30.57	23.2971
30.6133	22.1652	30.6117	23.2926
30.655	22.1636	30.6533	23.2897
30.6967	22.1636	30.695	23.2926
30.7383	22.1606	30.7367	23.2926
30.78	22.1606	30.7783	23.2882
30.8217	22.1576	30.82	23.2882
30.8633	22.1546	30.8617	23.2912
30.905	22.1546	30.9033	23.2912
30.9467	22.1576	30.945	23.2868
30.9883	22.1621	30.9867	23.2897
31.03	22.1667	31.0283	23.2941
31.0717	22.1727	31.07	23.2956
31.1133	22.1818	31.1117	23.2941
31.155	22.1879	31.1533	23.2971
31.1967	22.197	31.195	23.3015
31.2383	22.203	31.2367	23.3044
31.28	22.2091	31.2783	23.3029
31.3217	22.2152	31.32	23.3059
31.3633	22.2167	31.3617	23.3118
31.405	22.2197	31.4033	23.3176
31.4467	22.2227	31.445	23.3221
31.4883	22.2212	31.4867	23.3265
31.53	22.2197	31.5283	23.3309
31.57	22.2182	31.57	23.3353
31.6133	22.2167	31.6117	23.3324
31.6533	22.2121	31.6533	23.3338
31.695	22.2076	31.695	23.3338
31.7383	22.2076	31.7367	23.3309
31.7783	22.2121	31.7783	23.3265
31.82	22.2121	31.82	23.3206
31.8633	22.2152	31.8617	23.3162
31.905	22.2212	31.9033	23.3132
31.945	22.2273	31.945	23.3088
31.9867	22.2349	31.9867	23.3088
32.0283	22.2439	32.0283	23.3162
32.07	22.2515	32.07	23.3235
32.1117	22.2591	32.1117	23.3279
32.155	22.2636	32.1517	23.3368
32.1967	22.2667	32.1933	23.3397
32.2383	22.2712	32.2367	23.3441
32.28	22.2758	32.2783	23.3412
32.3217	22.2773	32.32	23.3397
32.3633	22.2773	32.3617	23.3426
32.405	22.2803	32.4033	23.3382
32.4467	22.2818	32.445	23.3324
32.4883	22.2803	32.4867	23.3235
32.5283	22.2758	32.5283	23.3221
32.5717	22.2758	32.57	23.3132
32.6133	22.2758	32.6117	23.3073
32.655	22.2758	32.6533	23.3059
32.6967	22.2742	32.695	23.3059
32.7367	22.2773	32.7367	23.3059
32.7783	22.2803	32.7783	23.3015
32.82	22.2848	32.82	23.3015
32.8617	22.2864	32.8617	23.3059
32.9033	22.2894	32.9033	23.3103
32.9467	22.2939	32.945	23.3118
32.9883	22.297	32.9867	23.3162
33.03	22.2985	33.0283	23.325
33.0717	22.303	33.07	23.3309
33.1133	22.3091	33.1117	23.3294
33.155	22.3121	33.1533	23.3324
33.1967	22.3121	33.195	23.3397
33.2383	22.3151	33.2367	23.3382
33.28	22.3167	33.2783	23.3324
33.3217	22.3167	33.32	23.3324
33.3633	22.3151	33.3617	23.3368
33.405	22.3182	33.4017	23.3353
33.4467	22.3227	33.445	23.3324
33.4883	22.3227	33.4867	23.3324
33.53	22.3242	33.5283	23.3368
33.57	22.3273	33.57	23.3382
33.6117	22.3303	33.6117	23.3397
33.6533	22.3288	33.6533	23.3441
33.695	22.3288	33.695	23.3485
33.7367	22.3303	33.735	23.3485
33.7783	22.3333	33.7783	23.3471
33.8217	22.3348	33.8183	23.3485
33.8617	22.3364	33.86	23.3529
33.9033	22.3409	33.9033	23.3529
33.945	22.3439	33.945	23.3485
33.9867	22.3455	33.9867	23.3515
34.0283	22.3455	34.0283	23.3574
34.07	22.347	34.07	23.3618
34.1117	22.3485	34.1117	23.3618
34.1533	22.347	34.1533	23.3632
34.195	22.347	34.195	23.3691
34.2367	22.347	34.2367	23.3706
34.2783	22.35	34.2783	23.3662
34.3217	22.3515	34.32	23.3677
34.3617	22.3545	34.3617	23.3721
34.4033	22.3591	34.4033	23.3706
34.445	22.3667	34.445	23.3691
34.4867	22.3742	34.4867	23.3691
34.5283	22.3803	34.5283	23.3765
34.5717	22.3864	34.5683	23.3838
34.6133	22.3894	34.6117	23.3926
34.655	22.3924	34.6517	23.4029
34.6967	22.3924	34.695	23.4118
34.7383	22.3924	34.7367	23.4191
34.78	22.3924	34.7783	23.4235
34.8217	22.3894	34.82	23.4309
34.8633	22.3864	34.8617	23.4353
34.905	22.3849	34.9033	23.4353
34.9467	22.3833	34.945	23.4323
34.9883	22.3803	34.9867	23.4309
35.03	22.3773	35.0283	23.4338
35.0717	22.3773	35.0683	23.4338
35.1133	22.3803	35.11	23.4309
35.155	22.3803	35.1533	23.4338
35.1967	22.3818	35.195	23.4397
35.2383	22.3864	35.2367	23.4456
35.28	22.3939	35.2783	23.4485
35.32	22.4	35.32	23.4559
35.3617	22.4046	35.3617	23.4647
35.4033	22.4121	35.4033	23.4735
35.445	22.4167	35.4433	23.4794
35.4867	22.4197	35.4867	23.4853
35.53	22.4227	35.5283	23.4897
35.5717	22.4258	35.57	23.4956
35.6133	22.4273	35.6117	23.4956
35.655	22.4273	35.6533	23.5
35.6967	22.4258	35.695	23.5044
35.7383	22.4242	35.7367	23.5073
35.78	22.4242	35.7783	23.5044
35.8217	22.4227	35.82	23.5015
35.8633	22.4182	35.8617	23.5015
35.905	22.4182	35.9033	23.4956
35.9467	22.4167	35.945	23.4897
35.9883	22.4167	35.9867	23.4838
36.03	22.4167
36.0717	22.4182
36.1117	22.4242
36.1533	22.4318
36.195	22.4379
36.2367	22.447
36.2783	22.453
36.3217	22.4591
36.3633	22.4621
36.4033	22.4667
36.4467	22.4682
36.4883	22.4712
36.53	22.4697
36.5717	22.4697
36.6133	22.4742
36.6533	22.4742
36.695	22.4742
36.7383	22.4742
36.78	22.4773
36.8217	22.4788
36.8633	22.4788
36.905	22.4818
36.9467	22.4879
36.9883	22.4909
37.03	22.4939
37.0717	22.5
37.1133	22.5061
37.155	22.5121
37.1967	22.5182
37.2383	22.5242
37.28	22.5273
37.3217	22.5303
37.3633	22.5303
37.405	22.5303
37.4467	22.5303
37.4883	22.5303
37.53	22.5273
37.5717	22.5288
37.6133	22.5303
37.655	22.5318
37.6967	22.5333
37.7383	22.5348
37.78	22.5394
37.82	22.5424
37.8617	22.547
37.9033	22.55
37.9467	22.5515
37.9883	22.553
38.03	22.5545
38.0717	22.5576
38.1133	22.5606
38.155	22.5621
38.1967	22.5606
38.2383	22.5621
38.28	22.5651
38.3217	22.5651
38.3633	22.5636
38.405	22.5651
38.4467	22.5682
38.4883	22.5712
38.53	22.5727
38.5717	22.5758
38.6133	22.5803
38.655	22.5864
38.6967	22.5894
38.7383	22.5955
38.78	22.5985
38.8217	22.6
38.8633	22.5985
38.905	22.597
38.9467	22.5985
38.9883	22.5955
39.03	22.5924
39.0717	22.5924
39.1133	22.5939
39.155	22.5924
39.1967	22.5909
39.2383	22.5924
39.28	22.5939
39.3217	22.5939
39.3633	22.5955
39.405	22.6
39.4467	22.6061
39.4883	22.6121
39.5283	22.6197
39.57	22.6288
39.6117	22.6349
39.655	22.6409
39.6967	22.6424
39.7367	22.6424
39.78	22.6439
39.8217	22.6409
39.8617	22.6379
39.9033	22.6364
39.9467	22.6349
39.9867	22.6333
40.0283	22.6318
40.0717	22.6318
40.1133	22.6333
40.155	22.6364
40.195	22.6394
40.2367	22.6439
40.2783	22.653
40.32	22.6591
40.3617	22.6652
40.4033	22.6712
40.445	22.6773
40.4867	22.6849
40.5283	22.6909
40.5717	22.697
40.6133	22.7015
40.655	22.7046
40.6967	22.703
40.7383	22.703
40.78	22.7046
40.8217	22.7015
40.8633	22.7
40.905	22.6985
40.9467	22.7
40.9883	22.6985
41.03	22.697
41.0717	22.6985
41.1133	22.7015
41.155	22.7076
41.1967	22.7121
41.2383	22.7167
41.28	22.7227
41.3217	22.7273
41.3633	22.7303
41.405	22.7349
41.4467	22.7349
41.4883	22.7349
41.53	22.7349
41.5717	22.7333
41.6133	22.7333
41.6533	22.7303
41.695	22.7288
41.7383	22.7273
41.78	22.7258
41.8217	22.7212
41.8633	22.7197
41.905	22.7197
41.945	22.7212
41.9867	22.7227
42.0283	22.7227
42.07	22.7242
42.1117	22.7303
42.1533	22.7333
42.195	22.7379
42.2367	22.7424
42.2783	22.7439
42.32	22.7424
42.3617	22.7439
42.4033	22.7455
42.445	22.7455
42.4867	22.7455
42.5283	22.7424
42.57	22.7455
42.6133	22.7455
42.6533	22.7455
42.6967	22.747
42.7383	22.75
42.7783	22.7561
42.82	22.7636
42.8617	22.7682
42.9033	22.7742
42.9467	22.7758
42.9883	22.7788
43.03	22.7773
43.0717	22.7758
43.1133	22.7773
43.155	22.7742
43.1967	22.7712
43.2383	22.7697
43.28	22.7697
43.3217	22.7682
43.3633	22.7667
43.405	22.7682
43.4467	22.7697
43.4883	22.7727
43.53	22.7742
43.5717	22.7788
43.6133	22.7848
43.655	22.7894
43.6967	22.7955
43.7367	22.8
43.78	22.8076
43.8217	22.8121
43.8633	22.8151
43.905	22.8197
43.9467	22.8212
43.9883	22.8182
44.03	22.8167
44.0717	22.8151
44.1133	22.8151
44.155	22.8136
44.1967	22.8121
44.2383	22.8121
44.28	22.8151
44.3217	22.8182
44.3633	22.8212
44.4033	22.8258
44.4467	22.8333
44.4867	22.8439
44.5283	22.853
44.57	22.8606
44.6117	22.8682
44.655	22.8727
44.6967	22.8788
44.7383	22.8864
44.78	22.8909
44.8217	22.8955
44.8633	22.897
44.905	22.8985
44.9467	22.9015
44.9883	22.9
45.03	22.897
45.0717	22.8985
45.1133	22.9015
45.155	22.9015
45.1967	22.9046
45.2383	22.9106
45.28	22.9167
45.3217	22.9227
45.3633	22.9303
45.405	22.9379
45.4467	22.9439
45.4883	22.9515
45.53	22.9546
45.5717	22.9591
45.6133	22.9621
45.655	22.9652
45.6967	22.9667
45.7383	22.9697
45.78	22.9697
45.8217	22.9697
45.8633	22.9667
45.905	22.9682
45.9467	22.9697
45.9883	22.9682
46.03	22.9682
46.0717	22.9712
46.1117	22.9742
46.1533	22.9758
46.195	22.9773
46.2367	22.9803
46.2783	22.9864
46.3217	22.9879
46.3633	22.9909
46.405	22.9955
46.4467	22.997
46.4883	22.9985
46.53	23
46.5717	23.0045
46.6133	23.0076
46.6533	23.0091
46.695	23.0061
46.7383	23.0091
46.78	23.0136
46.8217	23.0136
46.8633	23.0136
46.905	23.0182
46.945	23.0227
46.9867	23.0258
47.0283	23.0288
47.07	23.0348
47.1117	23.0394
47.155	23.0424
47.1967	23.0455
47.2383	23.047
47.2783	23.0485
47.3217	23.047
47.3633	23.047
47.405	23.0485
47.445	23.0485
47.4867	23.047
47.5283	23.0439
47.5717	23.0455
47.6117	23.0485
47.655	23.0485
47.6967	23.05
47.7383	23.053
47.78	23.0591
47.82	23.0651
47.8617	23.0727
47.9033	23.0803
47.9467	23.0848
47.9883	23.0894
48.03	23.0894
48.0717	23.0924
48.1133	23.0924
48.155	23.0894
48.1967	23.0864
48.2383	23.0818
48.28	23.0803
48.32	23.0788
48.3633	23.0773
48.405	23.0773
48.4467	23.0788
48.4883	23.0833
48.53	23.0879
48.57	23.0955
48.6117	23.1015
48.6533	23.1076
48.695	23.1091
48.7367	23.1136
48.7783	23.1182
48.8217	23.1212
48.8633	23.1227
48.905	23.1258
48.9467	23.1288
48.9883	23.1273
49.03	23.1242
49.07	23.1227
49.1117	23.1212
49.1533	23.1167
49.195	23.1106
49.2367	23.1045
49.28	23.0985
49.3217	23.0939
49.3633	23.0894
49.4033	23.0894
49.4467	23.0909
49.4883	23.0909
49.5283	23.0879
49.57	23.0879
49.6117	23.0879
49.655	23.0818
49.6967	23.0742
49.7383	23.0606
49.78	23.047
49.8217	23.0288
49.8633	22.9985

## Sheet: Thermal properties(TGA)
	Temperature	Weight	Temperature	Weight	Temperature	Weight	Temperature	Weight
	oC	%	oC	%	oC	%	oC	%
	x-PDB-0-F5-SEBS	x-PDB-0-F5-SEBS	x-PDB-4-F5-SEBS	x-PDB-4-F5-SEBS	x-PDB-8-F5-SEBS	x-PDB-8-F5-SEBS	x-PDB-12-F5-SEBS	x-PDB-12-F5-SEBS
	25.6005	99.8892	27.477	99.9496	26.2429	99.9374	27.5407	100.142
	25.6273	99.8886	27.5777	99.9483	26.2563	99.9357	27.6424	100.142
	25.6558	99.8879	27.6788	99.9476	26.2702	99.9347	27.7449	100.141
	25.7125	99.8855	27.8806	99.9455	26.2981	99.9325	27.9496	100.141
	25.7746	99.8833	28.0825	99.9435	26.3296	99.93	28.1559	100.142
	25.8423	99.8811	28.2853	99.942	26.3652	99.928	28.3632	100.141
	25.9158	99.8779	28.4888	99.9408	26.4042	99.9261	28.5714	100.141
	25.9951	99.8746	28.6937	99.9392	26.448	99.9238	28.7805	100.141
	26.0811	99.8721	28.8997	99.938	26.4961	99.9213	28.9907	100.139
	26.1725	99.8695	29.1072	99.9362	26.549	99.919	29.2015	100.137
	26.2699	99.8673	29.3162	99.933	26.607	99.9163	29.4129	100.136
	26.3738	99.8659	29.5268	99.9292	26.6711	99.9149	29.6255	100.133
	26.4846	99.8641	29.739	99.9248	26.7408	99.9147	29.8379	100.132
	26.6013	99.8625	29.9532	99.9199	26.8166	99.9156	30.0504	100.13
	26.7249	99.8607	30.1696	99.9156	26.8984	99.917	30.2629	100.131
	26.855	99.8586	30.3879	99.9114	26.986	99.9182	30.4753	100.132
	26.9912	99.8557	30.6075	99.9071	27.0799	99.9179	30.6874	100.134
	27.1329	99.853	30.8281	99.9036	27.1802	99.9159	30.8996	100.134
	27.2804	99.8504	31.0492	99.9003	27.2871	99.9128	31.1114	100.134
	27.4337	99.8477	31.2711	99.8968	27.4001	99.9097	31.3227	100.133
	27.5924	99.8451	31.4938	99.8936	27.5187	99.9068	31.5329	100.131
	27.7562	99.8433	31.7173	99.8904	27.6429	99.9046	31.7415	100.13
	27.9252	99.8414	31.9415	99.8863	27.7732	99.9033	31.9494	100.129
	28.0992	99.8391	32.1663	99.8821	27.9089	99.9026	32.1558	100.128
	28.2782	99.8364	32.3913	99.877	28.051	99.9023	32.3605	100.125
	28.4613	99.8337	32.6161	99.8711	28.1996	99.9025	32.564	100.12
	28.6491	99.8303	32.8403	99.8655	28.3538	99.9031	32.7663	100.114
	28.8409	99.8267	33.0639	99.8602	28.5135	99.9031	32.9662	100.109
	29.0361	99.8232	33.2869	99.8547	28.679	99.9025	33.1648	100.105
	29.2343	99.8197	33.5095	99.8494	28.8489	99.9001	33.3625	100.102
	29.4359	99.8155	33.7311	99.8446	29.0234	99.8961	33.5591	100.1
	29.6399	99.8113	33.9521	99.8394	29.2028	99.8916	33.7542	100.097
	29.8466	99.8066	34.1723	99.8337	29.3857	99.8873	33.9491	100.092
	30.0563	99.8017	34.3918	99.8278	29.5719	99.8834	34.1428	100.087
	30.2685	99.7965	34.6102	99.8214	29.7614	99.8808	34.3348	100.083
	30.4836	99.7921	34.8278	99.8139	29.954	99.8797	34.5258	100.078
	30.7016	99.7878	35.0446	99.8053	30.1488	99.8793	34.7165	100.076
	30.9227	99.7838	35.2606	99.797	30.3472	99.8781	34.9066	100.075
	31.146	99.7789	35.4758	99.7887	30.5481	99.8766	35.096	100.074
	31.3716	99.7741	35.6896	99.7809	30.7524	99.8748	35.2856	100.072
	31.5994	99.7686	35.9028	99.7735	30.9595	99.8721	35.4753	100.07
	31.8282	99.7627	36.1155	99.767	31.1699	99.8688	35.6652	100.067
	32.0575	99.756	36.3275	99.7606	31.3818	99.866	35.8549	100.064
	32.2874	99.7502	36.5389	99.7537	31.5963	99.8633	36.0446	100.062
	32.5182	99.7438	36.7504	99.7462	31.8126	99.8605	36.2343	100.06
	32.7494	99.7365	36.9619	99.7386	32.0303	99.8579	36.4239	100.058
	32.9816	99.7291	37.1728	99.7312	32.2489	99.855	36.6133	100.057
	33.2145	99.7223	37.3833	99.7235	32.4685	99.852	36.8027	100.054
	33.4482	99.7148	37.5932	99.7156	32.6885	99.8487	36.9925	100.051
	33.6821	99.7067	37.8024	99.7076	32.9091	99.8457	37.1822	100.047
	33.917	99.6995	38.0097	99.6993	33.1306	99.8424	37.3711	100.044
	34.1514	99.6918	38.2162	99.6903	33.3527	99.8384	37.5594	100.04
	34.3859	99.6834	38.4214	99.6806	33.5763	99.8341	37.7473	100.036
	34.6204	99.6753	38.6258	99.671	33.8005	99.8303	37.9348	100.031
	34.8541	99.6671	38.8292	99.6612	34.0256	99.8268	38.1225	100.027
	35.0865	99.6582	39.0327	99.6521	34.2507	99.8245	38.3105	100.024
	35.3187	99.6489	39.2357	99.6424	34.4759	99.8229	38.4987	100.022
	35.5507	99.6395	39.438	99.6332	34.7016	99.82	38.6872	100.019
	35.7821	99.63	39.6399	99.624	34.9281	99.8158	38.8755	100.016
	36.0132	99.6201	39.8413	99.6151	35.1544	99.811	39.0627	100.012
	36.2438	99.6097	40.0421	99.6055	35.3827	99.805	39.25	100.006
	36.4732	99.5996	40.243	99.5959	35.612	99.7987	39.4367	99.9998
	36.7015	99.5897	40.444	99.5854	35.8416	99.7937	39.6223	99.9949
	36.9294	99.5792	40.6451	99.5744	36.0708	99.7896	39.8077	99.9909
	37.1567	99.5691	40.8471	99.5623	36.3004	99.7856	39.9934	99.9879
	37.383	99.5588	41.0497	99.55	36.5282	99.7812	40.1781	99.9857
	37.6094	99.5481	41.2516	99.5372	36.756	99.7763	40.3617	99.9832
	37.8358	99.5366	41.4532	99.5244	36.9837	99.7711	40.5453	99.9768
	38.0616	99.5251	41.6546	99.5117	37.2116	99.7656	40.7281	99.9687
	38.2874	99.5133	41.855	99.4998	37.4397	99.7591	40.9103	99.9606
	38.5133	99.5015	42.0541	99.4882	37.6682	99.7528	41.0925	99.9529
	38.7384	99.4897	42.2527	99.4775	37.8954	99.7472	41.2756	99.9452
	38.963	99.4786	42.4505	99.4674	38.1211	99.7414	41.459	99.9403
	39.1872	99.4667	42.6471	99.4576	38.3453	99.7352	41.6427	99.9373
	39.4103	99.4548	42.8435	99.4472	38.5676	99.7297	41.8273	99.9335
	39.6332	99.4423	43.0399	99.4361	38.7883	99.7241	42.0128	99.9288
	39.8554	99.4292	43.2355	99.4245	39.0079	99.7178	42.1989	99.9249
	40.0769	99.4151	43.431	99.4121	39.226	99.7115	42.3858	99.9201
	40.2973	99.4014	43.6264	99.3998	39.4427	99.7047	42.5734	99.915
	40.5175	99.3875	43.8216	99.3879	39.6581	99.6973	42.7604	99.9097
	40.7364	99.3741	44.0163	99.3762	39.8721	99.6902	42.9474	99.9056
	40.955	99.3607	44.2116	99.3641	40.0843	99.6829	43.1341	99.901
	41.1725	99.3471	44.406	99.3516	40.2958	99.6759	43.3201	99.8974
	41.3889	99.3331	44.6003	99.3392	40.5074	99.6695	43.5057	99.8936
	41.6037	99.3183	44.7936	99.3271	40.7186	99.6629	43.6909	99.8894
	41.8175	99.3035	44.9865	99.3156	40.9294	99.6561	43.8748	99.8845
	42.0296	99.2886	45.1786	99.3044	41.1403	99.6486	44.0579	99.8798
	42.2414	99.2739	45.3705	99.2947	41.3504	99.6411	44.2408	99.8752
	42.453	99.259	45.5621	99.284	41.559	99.6339	44.4231	99.871
	42.6647	99.2441	45.7529	99.2725	41.767	99.6265	44.6052	99.8656
	42.8762	99.2295	45.9429	99.26	41.9738	99.6187	44.7872	99.8585
	43.0879	99.215	46.1326	99.2474	42.1797	99.6127	44.9692	99.8498
	43.2995	99.2004	46.322	99.2345	42.3849	99.6069	45.151	99.8411
	43.5116	99.1853	46.5115	99.2218	42.5902	99.6	45.3331	99.8331
	43.7244	99.1704	46.7017	99.2087	42.7947	99.5935	45.5161	99.8269
	43.9378	99.1552	46.8922	99.1955	42.9993	99.5858	45.6999	99.821
	44.1514	99.1397	47.083	99.1821	43.2034	99.5769	45.8839	99.8163
	44.365	99.124	47.2742	99.168	43.4076	99.5673	46.068	99.8117
	44.5782	99.1094	47.4655	99.1538	43.6109	99.5586	46.2521	99.8065
	44.7905	99.0952	47.6566	99.1402	43.8138	99.5504	46.4356	99.8011
	45.002	99.0803	47.8481	99.1273	44.0158	99.5426	46.619	99.7973
	45.2135	99.065	48.039	99.1143	44.2176	99.5345	46.8017	99.7921
	45.4243	99.0494	48.2303	99.1009	44.4188	99.5265	46.9845	99.7868
	45.6347	99.0329	48.4213	99.0879	44.6202	99.5181	47.1668	99.7819
	45.8448	99.0158	48.612	99.0744	44.8211	99.5092	47.3494	99.7773
	46.0541	98.9983	48.8022	99.0606	45.0217	99.5011	47.5312	99.7724
	46.2628	98.9813	48.9925	99.0464	45.222	99.4932	47.7131	99.7693
	46.4707	98.9642	49.1817	99.0335	45.4216	99.4857	47.8947	99.766
	46.6778	98.9462	49.3707	99.0213	45.6207	99.4781	48.0761	99.7613
	46.8841	98.9286	49.559	99.0095	45.8192	99.47	48.2563	99.7554
	47.0898	98.9117	49.7469	98.9977	46.0168	99.4617	48.4372	99.7476
	47.2947	98.8944	49.9345	98.9864	46.2129	99.4529	48.6181	99.7403
	47.4997	98.8774	50.1218	98.9746	46.4076	99.4435	48.7991	99.7335
	47.7041	98.8607	50.3093	98.9622	46.6002	99.4339	48.9801	99.7272
	47.9082	98.8435	50.4967	98.9492	46.7918	99.4244	49.1613	99.7206
	48.1124	98.8255	50.6847	98.936	46.9821	99.4149	49.3427	99.7154
	48.3162	98.8077	50.8725	98.9228	47.1718	99.4055	49.5238	99.7103
	48.52	98.789	51.0611	98.9094	47.361	99.3962	49.7047	99.7053
	48.7237	98.7703	51.2499	98.8956	47.5504	99.3867	49.8857	99.7008
	48.9268	98.7521	51.4395	98.8823	47.7391	99.3771	50.0674	99.6971
	49.129	98.7346	51.629	98.8691	47.9274	99.3677	50.2499	99.6925
	49.3316	98.7169	51.819	98.8562	48.1162	99.3589	50.4326	99.687
	49.5335	98.7003	52.0091	98.8427	48.3048	99.3496	50.6157	99.6808
	49.7351	98.6842	52.199	98.8293	48.4935	99.3403	50.7985	99.6734
	49.9369	98.6672	52.3892	98.8162	48.6826	99.3305	50.9804	99.6649
	50.1386	98.6499	52.5802	98.8033	48.8728	99.3191	51.1615	99.6568
	50.339	98.6327	52.7714	98.7899	49.0628	99.307	51.3421	99.648
	50.5388	98.6151	52.9625	98.7766	49.2527	99.2947	51.5224	99.639
	50.7377	98.5972	53.154	98.7626	49.4422	99.2815	51.7022	99.6298
	50.9356	98.5797	53.3449	98.7485	49.6304	99.267	51.882	99.621
	51.1328	98.5621	53.5354	98.7345	49.8173	99.2518	52.0606	99.614
	51.3298	98.5449	53.725	98.7209	50.0027	99.231	52.2385	99.6088
	51.5262	98.5276	53.9144	98.7075	50.1872	99.2056	52.4162	99.6042
	51.7224	98.5106	54.1031	98.6939	50.3704	99.1794	52.5936	99.6012
	51.919	98.4935	54.2915	98.6792	50.5536	99.155	52.7707	99.5992
	52.1159	98.4771	54.4794	98.665	50.736	99.1328	52.9482	99.5958
	52.3129	98.4595	54.6668	98.6509	50.9186	99.1165	53.126	99.5912
	52.5102	98.4416	54.8537	98.6364	51.1007	99.1048	53.3034	99.5853
	52.7074	98.4239	55.0403	98.6229	51.2831	99.095	53.4811	99.5778
	52.9044	98.4066	55.2272	98.6103	51.4658	99.0855	53.6593	99.5696
	53.1015	98.3884	55.4142	98.5971	51.6492	99.0768	53.8376	99.5617
	53.2983	98.3712	55.6014	98.5843	51.8333	99.0687	54.0155	99.5545
	53.495	98.3545	55.7892	98.5717	52.0184	99.0606	54.1939	99.5482
	53.6926	98.3373	55.9785	98.5589	52.2041	99.0522	54.3726	99.5419
	53.8904	98.3204	56.1677	98.5465	52.3902	99.0435	54.5515	99.5362
	54.0878	98.3042	56.357	98.5338	52.5772	99.0333	54.7304	99.5303
	54.286	98.2872	56.5476	98.5201	52.764	99.0221	54.9098	99.5236
	54.4845	98.2699	56.7386	98.5069	52.9509	99.0112	55.0898	99.5158
	54.6822	98.2538	56.9293	98.4932	53.1384	99.0007	55.2698	99.5087
	54.8798	98.2369	57.1202	98.4793	53.3266	98.9905	55.4497	99.5007
	55.0774	98.2194	57.3113	98.4653	53.5147	98.9802	55.6299	99.4916
	55.2747	98.2032	57.5018	98.452	53.7035	98.9705	55.8105	99.4828
	55.4727	98.1871	57.6923	98.4384	53.8927	98.9609	55.991	99.4757
	55.6706	98.171	57.8824	98.4255	54.0817	98.951	56.1718	99.4682
	55.8688	98.1553	58.0727	98.4123	54.2708	98.9405	56.3525	99.4618
	56.0673	98.1392	58.2626	98.3987	54.4605	98.9299	56.5339	99.457
	56.2653	98.1228	58.4523	98.3853	54.6514	98.9188	56.7155	99.4518
	56.4622	98.1064	58.6415	98.372	54.8438	98.9072	56.8967	99.4449
	56.659	98.0894	58.8303	98.3591	55.0375	98.8962	57.0781	99.4373
	56.8557	98.0728	59.0183	98.3463	55.2322	98.8859	57.2594	99.4283
	57.0516	98.0569	59.205	98.334	55.4279	98.8757	57.4402	99.4181
	57.2473	98.0409	59.391	98.3213	55.6248	98.866	57.6201	99.4091
	57.4432	98.0255	59.5767	98.3079	55.8222	98.8571	57.8003	99.4021
	57.6395	98.0101	59.7623	98.2933	56.0211	98.8489	57.9802	99.3961
	57.8355	97.9947	59.9474	98.2786	56.2208	98.8447	58.1603	99.3891
	58.0314	97.9799	60.1339	98.2641	56.4212	98.8436	58.3401	99.3807
	58.2272	97.9645	60.3213	98.2497	56.6218	98.8447	58.5207	99.3699
	58.4222	97.9487	60.5092	98.2353	56.822	98.8461	58.7015	99.3565
	58.6158	97.9332	60.6976	98.2213	57.0215	98.8458	58.8821	99.3451
	58.8089	97.9177	60.8861	98.2079	57.2204	98.8407	59.0622	99.3382
	59.0025	97.9024	61.0738	98.1946	57.4183	98.8334	59.2423	99.3345
	59.196	97.8872	61.2606	98.1817	57.615	98.8248	59.4215	99.331
	59.3897	97.8722	61.4468	98.1701	57.8112	98.8158	59.6002	99.3292
	59.5843	97.8572	61.6331	98.1596	58.0067	98.8068	59.7782	99.3259
	59.7795	97.8424	61.8205	98.1486	58.202	98.7976	59.9558	99.3193
	59.9745	97.8274	62.0087	98.1375	58.3972	98.7877	60.1325	99.3117
	60.1695	97.8124	62.1975	98.1259	58.592	98.7767	60.3087	99.3048
	60.3653	97.797	62.3868	98.1136	58.7865	98.765	60.4834	99.2963
	60.5609	97.7819	62.5761	98.1006	58.9802	98.7535	60.6574	99.2875
	60.7557	97.7669	62.7645	98.0888	59.1735	98.7425	60.8312	99.28
	60.9504	97.7517	62.953	98.0781	59.3665	98.7316	61.0049	99.2723
	61.1446	97.7382	63.1417	98.0681	59.5592	98.7212	61.1781	99.2634
	61.3386	97.7246	63.3302	98.0582	59.7514	98.7114	61.3519	99.2565
	61.5317	97.7112	63.5181	98.048	59.944	98.7019	61.5261	99.2487
	61.724	97.6978	63.7056	98.0372	60.1367	98.6924	61.7014	99.24
	61.9156	97.684	63.8922	98.0252	60.3289	98.6827	61.8774	99.2314
	62.1067	97.6697	64.0782	98.0148	60.5209	98.6727	62.0539	99.224
	62.2977	97.6556	64.2641	98.0058	60.7133	98.663	62.2308	99.2157
	62.4888	97.6419	64.4497	97.9963	60.9055	98.6533	62.4074	99.2075
	62.6802	97.628	64.6357	97.985	61.0976	98.6428	62.5833	99.199
	62.871	97.6148	64.822	97.9727	61.29	98.6319	62.7581	99.1904
	63.062	97.6008	65.008	97.958	61.4829	98.6212	62.9322	99.1819
	63.2525	97.587	65.1934	97.9417	61.6761	98.6099	63.1059	99.1739
	63.4423	97.5732	65.3788	97.9265	61.8696	98.5987	63.2793	99.1649
	63.6319	97.5599	65.5641	97.9126	62.0638	98.5883	63.4524	99.1574
	63.8224	97.5469	65.7488	97.9009	62.2581	98.5787	63.6252	99.1502
	64.0124	97.5345	65.9334	97.8901	62.4525	98.571	63.7984	99.1407
	64.2019	97.5222	66.1188	97.8793	62.6467	98.5651	63.9719	99.1288
	64.391	97.5091	66.3042	97.8678	62.8407	98.5595	64.1455	99.1187
	64.5796	97.4958	66.489	97.8568	63.0332	98.5539	64.3196	99.1095
	64.7679	97.4822	66.674	97.847	63.2248	98.5486	64.4949	99.1018
	64.9569	97.4689	66.859	97.8384	63.4156	98.5412	64.6708	99.0968
	65.1468	97.4558	67.044	97.8298	63.6051	98.5316	64.8477	99.095
	65.3376	97.4433	67.2291	97.8219	63.793	98.5213	65.0249	99.0908
	65.5293	97.4311	67.4145	97.8132	63.9802	98.5131	65.202	99.0849
	65.7212	97.4192	67.5997	97.8021	64.1669	98.5143	65.378	99.0783
	65.9133	97.4068	67.7845	97.7887	64.3528	98.5219	65.5535	99.0712
	66.1059	97.3948	67.968	97.7748	64.5382	98.5302	65.7283	99.0631
	66.2986	97.3832	68.1503	97.7601	64.7238	98.5366	65.9031	99.0568
	66.4911	97.3712	68.3326	97.7469	64.9099	98.5383	66.0789	99.0512
	66.6835	97.3606	68.5145	97.7347	65.0951	98.5302	66.2554	99.0444
	66.8755	97.3492	68.6951	97.7241	65.2809	98.5173	66.4327	99.0372
	67.0666	97.3381	68.8754	97.7142	65.467	98.5052	66.6102	99.0299
	67.2576	97.3271	69.0552	97.7043	65.6535	98.4942	66.7881	99.0225
	67.4481	97.3164	69.2336	97.6936	65.8398	98.4844	66.9656	99.0146
	67.6384	97.3047	69.4114	97.682	66.0268	98.4742	67.1432	99.0071
	67.8289	97.2938	69.5894	97.6703	66.2131	98.462	67.3203	98.9992
	68.0197	97.283	69.7673	97.6581	66.398	98.4488	67.4978	98.9905
	68.2101	97.2713	69.9449	97.6463	66.5814	98.4364	67.6748	98.9821
	68.4008	97.2606	70.1235	97.6346	66.7648	98.4254	67.852	98.9748
	68.592	97.2493	70.3024	97.6232	66.9469	98.4151	68.0285	98.968
	68.7829	97.2386	70.4817	97.6121	67.1278	98.4053	68.2047	98.9613
	68.9731	97.2273	70.6613	97.6026	67.3088	98.3953	68.3803	98.9544
	69.1641	97.2164	70.8424	97.5931	67.4899	98.3862	68.5556	98.947
	69.3554	97.2049	71.0238	97.5848	67.669	98.3779	68.7306	98.938
	69.5461	97.1935	71.2057	97.5771	67.8478	98.3696	68.906	98.927
	69.7369	97.1814	71.388	97.5675	68.0265	98.3612	69.082	98.9153
	69.9285	97.1701	71.5713	97.5561	68.2048	98.3528	69.2574	98.9035
	70.1196	97.1595	71.7548	97.5448	68.3828	98.3431	69.4328	98.8918
	70.311	97.1486	71.9392	97.533	68.561	98.3325	69.608	98.8826
	70.5029	97.1386	72.1239	97.5209	68.7392	98.3219	69.7837	98.8756
	70.6953	97.1294	72.3101	97.5098	68.9173	98.3114	69.9596	98.8704
	70.8872	97.1192	72.4971	97.4997	69.0953	98.3017	70.1359	98.8658
	71.0786	97.1091	72.6851	97.4904	69.2734	98.2926	70.3125	98.8592
	71.269	97.0992	72.8734	97.4806	69.4516	98.2836	70.4894	98.8495
	71.4589	97.089	73.0639	97.4714	69.6302	98.2759	70.6653	98.8393
	71.6488	97.0788	73.2552	97.4629	69.8098	98.2716	70.8404	98.83
	71.8381	97.0691	73.4476	97.4545	69.9902	98.2685	71.0153	98.8226
	72.0273	97.0593	73.641	97.4455	70.1717	98.2651	71.1895	98.8175
	72.216	97.0499	73.8348	97.436	70.3539	98.2615	71.3623	98.8132
	72.4039	97.0405	74.0279	97.426	70.5361	98.2561	71.5346	98.8078
	72.5898	97.0318	74.2197	97.4166	70.7182	98.2472	71.7064	98.8001
	72.7751	97.0227	74.4098	97.4079	70.8998	98.2354	71.8782	98.7914
	72.9599	97.0137	74.5981	97.3992	71.0809	98.2218	72.0498	98.7828
	73.1449	97.0049	74.7855	97.3905	71.2619	98.2079	72.2221	98.7756
	73.33	96.9958	74.9719	97.3821	71.4428	98.1942	72.3944	98.7699
	73.5164	96.9865	75.1579	97.3737	71.6236	98.1811	72.5663	98.7661
	73.7031	96.9778	75.3445	97.3648	71.8039	98.1694	72.7377	98.7618
	73.8913	96.9683	75.5307	97.3556	71.9841	98.1592	72.9088	98.756
	74.0803	96.959	75.7171	97.3472	72.1652	98.1489	73.0799	98.7504
	74.2701	96.95	75.9043	97.3386	72.3482	98.1385	73.2507	98.7436
	74.4596	96.9405	76.0922	97.3296	72.5337	98.1282	73.4219	98.7357
	74.6498	96.9313	76.28	97.32	72.7232	98.1185	73.5937	98.7272
	74.8396	96.9224	76.4684	97.3113	72.9165	98.1096	73.7656	98.7205
	75.0295	96.9134	76.6566	97.3021	73.1132	98.1013	73.9374	98.712
	75.2201	96.9053	76.8447	97.2941	73.3121	98.0931	74.11	98.704
	75.4116	96.898	77.0326	97.2867	73.5131	98.0842	74.2832	98.6967
	75.6034	96.8898	77.2207	97.2805	73.7152	98.0751	74.4567	98.6914
	75.7957	96.8825	77.4088	97.2737	73.9174	98.0667	74.6315	98.6839
	75.988	96.8753	77.598	97.2669	74.1198	98.0583	74.8066	98.6759
	76.1795	96.8666	77.7872	97.2585	74.3218	98.0505	74.9826	98.6672
	76.3708	96.8579	77.9765	97.2485	74.5222	98.0426	75.1592	98.6593
	76.5618	96.8501	78.1662	97.2382	74.7209	98.0333	75.3371	98.651
	76.7524	96.8413	78.3558	97.2279	74.9181	98.023	75.5151	98.6437
	76.9428	96.8329	78.5454	97.2179	75.1136	98.0137	75.6937	98.6381
	77.1334	96.8256	78.735	97.2084	75.3079	98.0056	75.8719	98.6328
	77.3238	96.818	78.9244	97.1999	75.5013	97.9977	76.0499	98.6254
	77.514	96.8104	79.1138	97.1914	75.694	97.9893	76.2266	98.6165
	77.7034	96.8039	79.3036	97.1832	75.8869	97.9783	76.4029	98.6078
	77.8922	96.7966	79.4923	97.175	76.0791	97.9659	76.5786	98.5985
	78.0804	96.7888	79.6801	97.1665	76.2713	97.9505	76.7533	98.5881
	78.2681	96.7812	79.8682	97.1579	76.4627	97.9303	76.9275	98.5785
	78.455	96.7733	80.056	97.1491	76.6537	97.9123	77.1018	98.571
	78.6415	96.7647	80.2434	97.1403	76.8429	97.8976	77.2755	98.565
	78.8272	96.7569	80.4323	97.1321	77.032	97.881	77.4489	98.5598
	79.012	96.7503	80.6226	97.1249	77.22	97.864	77.6235	98.5547
	79.1958	96.7431	80.8132	97.1174	77.4075	97.8514	77.798	98.549
	79.3784	96.7361	81.0039	97.1101	77.594	97.8393	77.9714	98.5433
	79.5604	96.7298	81.1951	97.1032	77.7809	97.8278	78.145	98.5369
	79.7412	96.723	81.3857	97.0961	77.9672	97.8189	78.3185	98.5307
	79.9214	96.7148	81.5756	97.0885	78.1536	97.8111	78.4913	98.5245
	80.1018	96.7077	81.7653	97.0814	78.3399	97.8041	78.6639	98.5187
	80.2834	96.7007	81.9548	97.0744	78.5267	97.7969	78.8369	98.5116
	80.4658	96.6933	82.1443	97.0674	78.7129	97.7898	79.0103	98.5038
	80.65	96.6856	82.3332	97.0598	78.8993	97.7842	79.1838	98.4964
	80.8365	96.6794	82.5222	97.0521	79.0852	97.7814	79.3573	98.4905
	81.0244	96.6729	82.7109	97.0448	79.2717	97.7806	79.5314	98.4855
	81.214	96.6667	82.8993	97.0371	79.4591	97.7798	79.7057	98.48
	81.405	96.6599	83.0872	97.0288	79.6465	97.7773	79.8797	98.4738
	81.5977	96.654	83.2748	97.0204	79.8338	97.7729	80.0537	98.4676
	81.7915	96.6478	83.4624	97.0124	80.0223	97.7667	80.2269	98.4613
	81.9878	96.6416	83.6492	97.0039	80.211	97.7584	80.3997	98.4547
	82.186	96.6349	83.8349	96.9957	80.3993	97.7474	80.5722	98.4493
	82.3855	96.6292	84.0192	96.9881	80.5877	97.7347	80.7441	98.4441
	82.5864	96.6235	84.2031	96.9811	80.7757	97.7221	80.9151	98.439
	82.788	96.617	84.385	96.9741	80.9633	97.71	81.0866	98.4324
	82.9889	96.6111	84.5655	96.9675	81.1501	97.6979	81.2578	98.4255
	83.1899	96.6054	84.7456	96.9604	81.3362	97.6881	81.4295	98.4195
	83.3912	96.6	84.9254	96.9532	81.522	97.6809	81.6016	98.4153
	83.5917	96.5948	85.1042	96.9464	81.7082	97.6745	81.7746	98.4102
	83.7916	96.5901	85.2826	96.9386	81.8941	97.6676	81.9479	98.405
	83.991	96.5846	85.4605	96.9313	82.0801	97.6599	82.1216	98.4001
	84.1885	96.5796	85.6373	96.9247	82.2663	97.653	82.2946	98.3951
	84.3849	96.5744	85.8132	96.9178	82.4524	97.6452	82.467	98.3885
	84.5803	96.5693	85.9884	96.911	82.6381	97.6358	82.6391	98.3813
	84.7756	96.5635	86.1633	96.9049	82.8243	97.6252	82.8108	98.3741
	84.9708	96.558	86.3387	96.8983	83.0114	97.616	82.9827	98.3672
	85.1666	96.5523	86.5145	96.8919	83.1992	97.6059	83.1545	98.3602
	85.3628	96.5461	86.691	96.8861	83.3876	97.597	83.3269	98.3542
	85.5598	96.5397	86.8678	96.8792	83.5762	97.5894	83.4999	98.3507
	85.7568	96.5339	87.0447	96.8729	83.764	97.5825	83.6739	98.3479
	85.9539	96.5282	87.2221	96.8669	83.9509	97.5756	83.8484	98.344
	86.1513	96.5233	87.4006	96.8602	84.1369	97.5699	84.0232	98.3395
	86.3491	96.5187	87.5798	96.8534	84.3218	97.564	84.1981	98.3337
	86.5462	96.5141	87.7599	96.848	84.5066	97.5572	84.3727	98.3268
	86.7428	96.5088	87.9414	96.8414	84.6915	97.551	84.5469	98.3197
	86.9394	96.5037	88.124	96.8342	84.8755	97.5443	84.7204	98.314
	87.1351	96.4981	88.308	96.8278	85.0597	97.5369	84.8945	98.3097
	87.3299	96.4923	88.4928	96.8217	85.2442	97.5298	85.0685	98.3067
	87.525	96.4872	88.6786	96.815	85.4287	97.5234	85.2423	98.3033
	87.7198	96.4831	88.8647	96.8091	85.6138	97.5204	85.4162	98.2999
	87.9143	96.479	89.0513	96.8037	85.7993	97.5204	85.5899	98.2955
	88.1092	96.4746	89.2372	96.7976	85.9848	97.5206	85.7627	98.2899
	88.3045	96.4702	89.4236	96.7918	86.1702	97.5211	85.9351	98.284
	88.5003	96.4653	89.6101	96.7865	86.3551	97.5222	86.1066	98.2783
	88.6962	96.4607	89.7966	96.7813	86.5396	97.5191	86.2778	98.2715
	88.892	96.4556	89.983	96.7761	86.7245	97.5129	86.4494	98.2645
	89.0868	96.4507	90.1697	96.7716	86.9096	97.5055	86.6207	98.257
	89.2808	96.4465	90.3563	96.767	87.0948	97.4978	86.7923	98.2489
	89.4737	96.4424	90.5426	96.7616	87.2796	97.4905	86.9637	98.242
	89.6664	96.4383	90.7285	96.7559	87.4634	97.4844	87.135	98.238
	89.8583	96.4344	90.9144	96.75	87.6457	97.478	87.3048	98.2349
	90.0512	96.4303	91.1002	96.7437	87.8266	97.4726	87.4744	98.2322
	90.2438	96.4258	91.2846	96.7366	88.0064	97.4671	87.6436	98.2287
	90.4363	96.4214	91.4685	96.7306	88.1864	97.4606	87.8121	98.2245
	90.6291	96.4162	91.6523	96.7248	88.3662	97.4539	87.9801	98.2197
	90.8228	96.4114	91.8361	96.7194	88.5469	97.4473	88.1486	98.2142
	91.0162	96.4062	92.0203	96.7145	88.7292	97.4402	88.3174	98.2095
	91.2091	96.401	92.2065	96.7104	88.9126	97.4329	88.486	98.2065
	91.4015	96.3963	92.3942	96.7063	89.0971	97.426	88.6557	98.203
	91.593	96.3922	92.5838	96.7018	89.2833	97.4187	88.8256	98.1981
	91.7831	96.3884	92.7746	96.6979	89.4703	97.4117	88.9961	98.1926
	91.9725	96.3849	92.9665	96.6943	89.657	97.405	89.1675	98.1853
	92.1621	96.3808	93.1587	96.69	89.8436	97.3989	89.3396	98.178
	92.3516	96.3769	93.3518	96.6847	90.0302	97.3932	89.5125	98.1728
	92.5412	96.3725	93.5447	96.6786	90.2165	97.3886	89.6873	98.1698
	92.7307	96.3684	93.7378	96.6714	90.4029	97.3842	89.8635	98.1677
	92.9205	96.3646	93.9301	96.664	90.5891	97.3785	90.0398	98.1665
	93.11	96.3614	94.1224	96.657	90.7757	97.3722	90.2173	98.1654
	93.2997	96.3577	94.3138	96.6514	90.9616	97.3655	90.3945	98.1624
	93.4892	96.354	94.5044	96.6476	91.146	97.3581	90.5708	98.1591
	93.6789	96.3495	94.6952	96.644	91.3298	97.3508	90.7462	98.155
	93.8681	96.3456	94.8852	96.6398	91.5138	97.3452	90.9211	98.1493
	94.0571	96.3422	95.0747	96.6351	91.6986	97.3398	91.0947	98.1424
	94.2453	96.3391	95.2643	96.6302	91.8849	97.3344	91.269	98.1365
	94.4335	96.3368	95.4543	96.6252	92.0739	97.3295	91.443	98.1305
	94.6218	96.3345	95.6431	96.62	92.2654	97.3246	91.6178	98.1246
	94.8102	96.3315	95.8324	96.6155	92.4591	97.3196	91.7939	98.1196
	94.9984	96.3281	96.0215	96.6117	92.6551	97.3146	91.971	98.1152
	95.1869	96.3241	96.2096	96.6082	92.853	97.3103	92.1481	98.1095
	95.3746	96.3195	96.3962	96.6047	93.0514	97.3058	92.3261	98.1023
	95.5624	96.3157	96.5824	96.6009	93.2492	97.3009	92.5035	98.0962
	95.7496	96.3118	96.7678	96.5972	93.4459	97.2958	92.6798	98.092
	95.9371	96.3079	96.9517	96.5933	93.6402	97.2904	92.8553	98.0894
	96.1246	96.3047	97.1349	96.5892	93.8321	97.2833	93.0307	98.086
	96.3125	96.3018	97.3175	96.5841	94.0222	97.2761	93.2055	98.0826
	96.5004	96.2983	97.4986	96.579	94.2112	97.2688	93.3802	98.079
	96.6892	96.2955	97.6773	96.5742	94.4	97.2614	93.5551	98.0749
	96.8779	96.2929	97.8541	96.5696	94.5878	97.2548	93.7304	98.0699
	97.0667	96.2903	98.0297	96.564	94.7747	97.2498	93.905	98.0661
	97.2567	96.2883	98.2044	96.5582	94.9619	97.2451	94.0791	98.063
	97.4465	96.2862	98.3783	96.5529	95.1488	97.2404	94.253	98.058
	97.6368	96.2836	98.5538	96.5476	95.3346	97.2356	94.4267	98.0502
	97.8272	96.281	98.7303	96.5418	95.5205	97.2299	94.5996	98.0423
	98.0181	96.2781	98.9086	96.5368	95.7066	97.2232	94.7723	98.0361
	98.2084	96.2745	99.0878	96.5333	95.8912	97.2168	94.9453	98.0317
	98.3983	96.271	99.2686	96.5298	96.0747	97.2122	95.1185	98.0296
	98.587	96.2674	99.4494	96.5263	96.2579	97.2083	95.2916	98.0298
	98.774	96.2621	99.6309	96.5226	96.4404	97.2049	95.4647	98.0298
	98.959	96.2568	99.8124	96.5193	96.6219	97.2019	95.6373	98.0284
	99.1424	96.2527	99.9944	96.5155	96.8034	97.1982	95.8091	98.0263
	99.3238	96.2501	100.176	96.5113	96.9849	97.1941	95.9795	98.0237
	99.5049	96.2479	100.358	96.5074	97.1661	97.1899	96.1483	98.0222
	99.687	96.2472	100.539	96.5036	97.3476	97.1856	96.3166	98.0202
	99.8705	96.2462	100.72	96.4995	97.5297	97.1814	96.4851	98.0172
	100.055	96.2442	100.899	96.4955	97.7121	97.1777	96.6529	98.014
	100.243	96.2408	101.078	96.4922	97.8948	97.1738	96.8213	98.0111
	100.431	96.238	101.257	96.4889	98.0778	97.1704	96.9906	98.0074
	100.62	96.2358	101.437	96.4857	98.261	97.1672	97.1599	98.0049
	100.811	96.2342	101.617	96.4827	98.445	97.162	97.3293	98.0031
	101.003	96.2321	101.798	96.4789	98.6298	97.156	97.4989	98.0008
	101.195	96.2299	101.979	96.4747	98.8149	97.15	97.6688	97.9964
	101.388	96.2275	102.161	96.4712	99.0008	97.1428	97.8384	97.9905
	101.582	96.2248	102.343	96.468	99.1867	97.136	98.0079	97.9843
	101.776	96.2221	102.526	96.4649	99.373	97.1316	98.1768	97.9794
	101.972	96.22	102.708	96.4627	99.5598	97.1274	98.3453	97.9748
	102.167	96.2183	102.89	96.4603	99.7469	97.1223	98.5135	97.9718
	102.363	96.2165	103.072	96.4577	99.9339	97.1175	98.6814	97.9708
	102.56	96.2151	103.253	96.4558	100.121	97.1128	98.849	97.9703
	102.758	96.2137	103.433	96.4526	100.308	97.1096	99.0172	97.9685
	102.956	96.2121	103.612	96.4462	100.494	97.1086	99.1856	97.9651
	103.155	96.2102	103.79	96.439	100.679	97.1079	99.354	97.9609
	103.354	96.2079	103.965	96.431	100.864	97.1079	99.5232	97.9541
	103.553	96.2052	104.14	96.4225	101.049	97.1073	99.6935	97.9464
	103.751	96.202	104.314	96.4152	101.234	97.1048	99.8641	97.9402
	103.949	96.1992	104.488	96.4105	101.419	97.0998	100.035	97.9379
	104.146	96.1969	104.663	96.4087	101.603	97.0952	100.205	97.9378
	104.343	96.1942	104.839	96.4079	101.786	97.0904	100.375	97.9379
	104.539	96.1922	105.016	96.4076	101.969	97.0858	100.545	97.937
	104.735	96.1903	105.194	96.4081	102.152	97.0808	100.715	97.9341
	104.93	96.1884	105.373	96.4088	102.334	97.0764	100.885	97.9293
	105.125	96.1861	105.552	96.4076	102.514	97.0723	101.056	97.9248
	105.319	96.1845	105.731	96.4054	102.695	97.0683	101.227	97.9225
	105.513	96.182	105.911	96.4032	102.875	97.0644	101.397	97.9211
	105.705	96.1793	106.09	96.4006	103.055	97.0602	101.566	97.9197
	105.897	96.1767	106.269	96.3978	103.236	97.0563	101.735	97.9184
	106.089	96.1745	106.447	96.3953	103.419	97.0521	101.903	97.916
	106.28	96.1723	106.626	96.3935	103.602	97.0481	102.071	97.9126
	106.471	96.1704	106.805	96.3908	103.788	97.0444	102.239	97.9095
	106.66	96.1686	106.985	96.3883	103.974	97.0402	102.407	97.9068
	106.848	96.1667	107.166	96.3859	104.162	97.0353	102.576	97.9021
	107.035	96.1644	107.348	96.3833	104.349	97.0309	102.747	97.8966
	107.221	96.162	107.532	96.3798	104.535	97.027	102.92	97.8925
	107.406	96.1594	107.717	96.3766	104.721	97.0233	103.094	97.8889
	107.591	96.1567	107.903	96.3735	104.906	97.0209	103.269	97.8853
	107.776	96.1543	108.09	96.3702	105.091	97.0193	103.445	97.8834
	107.96	96.1526	108.278	96.3677	105.274	97.0169	103.621	97.8826
	108.144	96.1507	108.466	96.3658	105.457	97.014	103.796	97.881
	108.33	96.1494	108.654	96.3635	105.64	97.0111	103.971	97.8786
	108.517	96.1482	108.842	96.3607	105.822	97.0079	104.147	97.8765
	108.706	96.1465	109.029	96.3577	106.004	97.0046	104.322	97.8749
	108.898	96.1441	109.215	96.3541	106.185	97.0011	104.497	97.8731
	109.09	96.1421	109.4	96.3487	106.364	96.9971	104.672	97.8706
	109.282	96.1403	109.583	96.3419	106.541	96.9926	104.846	97.8696
	109.475	96.1385	109.766	96.3346	106.716	96.9885	105.019	97.8698
	109.669	96.1371	109.948	96.3278	106.889	96.9841	105.192	97.8695
	109.863	96.1358	110.13	96.3218	107.061	96.9795	105.365	97.8662
	110.057	96.1343	110.312	96.3182	107.233	96.9755	105.537	97.8625
	110.252	96.132	110.493	96.3163	107.404	96.9719	105.709	97.8585
	110.446	96.1297	110.675	96.3154	107.577	96.9683	105.881	97.8533
	110.64	96.1278	110.856	96.3143	107.752	96.9652	106.053	97.8489
	110.833	96.1258	111.036	96.313	107.929	96.963	106.223	97.8479
	111.026	96.1237	111.215	96.3112	108.107	96.9605	106.392	97.848
	111.218	96.1222	111.394	96.3094	108.287	96.9585	106.56	97.8476
	111.409	96.1206	111.573	96.3073	108.468	96.9564	106.727	97.8468
	111.602	96.119	111.751	96.3062	108.65	96.9541	106.895	97.8439
	111.793	96.1173	111.931	96.3052	108.831	96.9511	107.063	97.8409
	111.983	96.1155	112.111	96.3042	109.012	96.948	107.232	97.8378
	112.173	96.1137	112.291	96.3037	109.193	96.9433	107.401	97.8358
	112.363	96.1118	112.472	96.3034	109.373	96.9393	107.571	97.8348
	112.552	96.1097	112.653	96.3028	109.554	96.9356	107.741	97.8354
	112.743	96.1075	112.834	96.3018	109.735	96.9324	107.912	97.8355
	112.934	96.106	113.017	96.3003	109.916	96.9297	108.084	97.8351
	113.126	96.1045	113.199	96.298	110.098	96.9282	108.257	97.8332
	113.32	96.1032	113.383	96.2953	110.28	96.9267	108.431	97.8303
	113.512	96.1023	113.567	96.2923	110.462	96.925	108.605	97.8274
	113.703	96.1014	113.752	96.289	110.644	96.9229	108.78	97.8245
	113.892	96.1	113.937	96.2863	110.829	96.9176	108.954	97.8216
	114.079	96.0987	114.122	96.284	111.016	96.9087	109.126	97.8198
	114.264	96.0972	114.307	96.2821	111.205	96.8975	109.296	97.8182
	114.447	96.0954	114.491	96.28	111.399	96.8862	109.465	97.8167
	114.63	96.0938	114.674	96.278	111.596	96.8755	109.632	97.8152
	114.812	96.0922	114.856	96.2759	111.794	96.8676	109.798	97.814
	114.993	96.0903	115.036	96.2738	111.994	96.8628	109.962	97.8113
	115.175	96.0889	115.215	96.2718	112.194	96.8599	110.126	97.807
	115.357	96.0873	115.394	96.2699	112.394	96.8572	110.29	97.803
	115.539	96.0861	115.573	96.2679	112.593	96.8546	110.454	97.8003
	115.722	96.0853	115.751	96.2661	112.793	96.8525	110.62	97.7974
	115.905	96.0844	115.928	96.2642	112.992	96.8509	110.788	97.7955
	116.089	96.0827	116.107	96.2627	113.19	96.8494	110.956	97.7956
	116.273	96.0801	116.286	96.2613	113.388	96.8469	111.126	97.7946
	116.457	96.0757	116.465	96.2597	113.586	96.8441	111.298	97.7918
	116.642	96.0713	116.644	96.2579	113.782	96.8414	111.47	97.7892
	116.827	96.0683	116.825	96.2564	113.978	96.8382	111.643	97.7878
	117.013	96.0669	117.005	96.2541	114.172	96.8353	111.818	97.7856
	117.199	96.067	117.186	96.2515	114.366	96.8319	111.992	97.7829
	117.386	96.0688	117.366	96.249	114.558	96.8271	112.168	97.7811
	117.573	96.0702	117.547	96.2464	114.749	96.8225	112.343	97.7805
	117.76	96.0704	117.729	96.2436	114.94	96.8201	112.518	97.7797
	117.949	96.07	117.91	96.2402	115.13	96.8182	112.693	97.7797
	118.138	96.0694	118.091	96.2381	115.32	96.8179	112.867	97.7803
	118.328	96.0685	118.272	96.2359	115.509	96.8203	113.041	97.7805
	118.518	96.0675	118.454	96.2341	115.698	96.8207	113.215	97.7801
	118.707	96.0668	118.636	96.2323	115.888	96.8181	113.388	97.7789
	118.896	96.066	118.818	96.2314	116.076	96.8149	113.561	97.7774
	119.086	96.0649	119.001	96.2297	116.265	96.8111	113.734	97.7766
	119.275	96.0634	119.183	96.2285	116.452	96.8068	113.907	97.7766
	119.463	96.0623	119.365	96.2267	116.639	96.8032	114.079	97.776
	119.651	96.0613	119.545	96.2251	116.823	96.8009	114.25	97.775
	119.837	96.0599	119.725	96.2235	117.007	96.799	114.422	97.7741
	120.022	96.058	119.903	96.2209	117.189	96.797	114.593	97.7726
	120.205	96.0567	120.08	96.2184	117.371	96.7949	114.764	97.7708
	120.388	96.0548	120.256	96.2166	117.553	96.7936	114.935	97.7705
	120.569	96.0525	120.431	96.2144	117.735	96.792	115.108	97.771
	120.751	96.0509	120.605	96.2122	117.917	96.7903	115.281	97.7716
	120.932	96.0498	120.777	96.2112	118.099	96.7887	115.454	97.7722
	121.113	96.048	120.949	96.2103	118.281	96.787	115.627	97.7724
	121.294	96.0467	121.12	96.2092	118.461	96.7853	115.799	97.7696
	121.475	96.0455	121.291	96.2084	118.642	96.7835	115.971	97.7659
	121.656	96.0441	121.462	96.2074	118.823	96.7817	116.142	97.7626
	121.837	96.0434	121.634	96.2062	119.004	96.7796	116.313	97.7587
	122.019	96.0425	121.808	96.205	119.185	96.7777	116.484	97.7539
	122.201	96.0417	121.983	96.204	119.366	96.7758	116.654	97.7501
	122.386	96.0407	122.16	96.2029	119.547	96.7738	116.825	97.7469
	122.571	96.0396	122.338	96.2018	119.726	96.7723	116.997	97.744
	122.759	96.038	122.518	96.2007	119.901	96.7712	117.169	97.7426
	122.948	96.037	122.7	96.1994	120.073	96.7698	117.342	97.7434
	123.139	96.036	122.883	96.1978	120.241	96.7685	117.515	97.7451
	123.331	96.0351	123.068	96.1967	120.405	96.767	117.689	97.746
	123.523	96.0341	123.254	96.1953	120.569	96.7648	117.863	97.7465
	123.715	96.0334	123.44	96.1938	120.732	96.7631	118.038	97.7475
	123.906	96.0329	123.627	96.1916	120.895	96.7614	118.211	97.7473
	124.099	96.0323	123.816	96.1896	121.059	96.7591	118.384	97.7454
	124.291	96.0317	124.003	96.1873	121.224	96.7578	118.557	97.7441
	124.485	96.0304	124.191	96.1855	121.39	96.7572	118.729	97.7439
	124.68	96.0292	124.379	96.1838	121.559	96.7587	118.9	97.7431
	124.876	96.0283	124.566	96.1828	121.731	96.7627	119.071	97.7421
	125.072	96.0266	124.753	96.1821	121.903	96.7669	119.242	97.7411
	125.268	96.0246	124.94	96.1818	122.077	96.7693	119.412	97.7393
	125.464	96.023	125.125	96.1808	122.252	96.7712	119.583	97.7363
	125.66	96.0215	125.309	96.1793	122.428	96.7709	119.755	97.7338
	125.856	96.0196	125.494	96.1776	122.604	96.7686	119.926	97.7322
	126.052	96.0185	125.678	96.176	122.782	96.7669	120.098	97.7318
	126.246	96.0182	125.861	96.1739	122.961	96.7659	120.27	97.7314
	126.44	96.0177	126.045	96.1723	123.141	96.7645	120.442	97.7311
	126.633	96.0173	126.228	96.1709	123.322	96.7631	120.615	97.7291
	126.824	96.0162	126.41	96.1697	123.503	96.7604	120.788	97.7252
	127.015	96.0153	126.594	96.168	123.684	96.757	120.96	97.7197
	127.204	96.0138	126.778	96.166	123.862	96.7534	121.133	97.7151
	127.391	96.0121	126.963	96.1637	124.039	96.7509	121.304	97.7124
	127.576	96.0103	127.148	96.162	124.213	96.7487	121.474	97.7116
	127.759	96.0086	127.334	96.1605	124.386	96.7476	121.643	97.7123
	127.94	96.0071	127.52	96.1595	124.558	96.7481	121.809	97.7138
	128.119	96.0057	127.704	96.1588	124.73	96.7494	121.973	97.7141
	128.298	96.0043	127.888	96.1586	124.902	96.7502	122.137	97.7122
	128.477	96.0029	128.072	96.1578	125.073	96.7504	122.299	97.7096
	128.657	96.0013	128.255	96.1572	125.244	96.7499	122.46	97.7073
	128.838	95.9998	128.439	96.1555	125.415	96.7485	122.621	97.7063
	129.02	95.9986	128.623	96.153	125.587	96.7462	122.78	97.7053
	129.202	95.9978	128.807	96.1507	125.759	96.7439	122.94	97.7022
	129.386	95.9971	128.992	96.1486	125.93	96.7422	123.102	97.6976
	129.571	95.9963	129.176	96.1467	126.102	96.7412	123.265	97.6937
	129.757	95.9949	129.361	96.1459	126.275	96.7409	123.43	97.6912
	129.944	95.9932	129.546	96.1461	126.448	96.7414	123.598	97.69
	130.133	95.9912	129.73	96.1466	126.622	96.7424	123.767	97.6917
	130.324	95.99	129.912	96.1469	126.797	96.7426	123.938	97.6948
	130.515	95.9889	130.094	96.1466	126.972	96.7421	124.111	97.6977
	130.706	95.988	130.276	96.1461	127.149	96.7406	124.284	97.699
	130.897	95.9875	130.458	96.1449	127.326	96.7386	124.458	97.699
	131.089	95.9871	130.64	96.1434	127.504	96.7355	124.633	97.6975
	131.28	95.9862	130.821	96.1417	127.682	96.7327	124.808	97.6975
	131.472	95.9855	131.002	96.1401	127.861	96.7305	124.984	97.7001
	131.664	95.985	131.181	96.1383	128.042	96.7289	125.159	97.704
	131.856	95.9846	131.36	96.1366	128.224	96.7275	125.335	97.7088
	132.047	95.9838	131.538	96.1346	128.41	96.7267	125.511	97.7149
	132.237	95.9828	131.717	96.1331	128.6	96.7274	125.686	97.7186
	132.427	95.982	131.895	96.132	128.793	96.7301	125.862	97.7189
	132.616	95.9807	132.073	96.1306	128.988	96.7338	126.038	97.7168
	132.805	95.9787	132.251	96.1291	129.186	96.738	126.214	97.714
	132.994	95.9767	132.429	96.1281	129.384	96.7421	126.389	97.71
	133.183	95.9743	132.606	96.127	129.584	96.745	126.565	97.7059
	133.371	95.972	132.783	96.1249	129.781	96.7444	126.741	97.7028
	133.56	95.9699	132.959	96.1225	129.979	96.7417	126.915	97.701
	133.749	95.968	133.132	96.1201	130.175	96.7383	127.088	97.6992
	133.938	95.9667	133.305	96.1173	130.37	96.7343	127.261	97.6974
	134.126	95.9654	133.476	96.1137	130.565	96.7285	127.434	97.6945
	134.314	95.964	133.648	96.1103	130.759	96.7239	127.605	97.6887
	134.501	95.9624	133.82	96.1075	130.95	96.7208	127.778	97.6819
	134.686	95.9611	133.993	96.1051	131.141	96.7178	127.95	97.6772
	134.87	95.96	134.168	96.1033	131.33	96.7158	128.123	97.6747
	135.053	95.9591	134.344	96.1023	131.517	96.716	128.294	97.6747
	135.235	95.9579	134.52	96.1018	131.702	96.7166	128.465	97.6787
	135.418	95.9567	134.696	96.1004	131.886	96.7155	128.635	97.6837
	135.6	95.955	134.873	96.0981	132.068	96.714	128.805	97.6851
	135.783	95.9529	135.049	96.0954	132.248	96.7119	128.974	97.6842
	135.967	95.9507	135.226	96.0925	132.428	96.7089	129.142	97.683
	136.151	95.9489	135.404	96.0904	132.606	96.7051	129.311	97.6813
	136.335	95.947	135.582	96.0895	132.785	96.7024	129.479	97.6802
	136.519	95.9455	135.761	96.0892	132.963	96.7003	129.647	97.6812
	136.703	95.9441	135.94	96.0892	133.143	96.6985	129.814	97.6833
	136.888	95.9425	136.12	96.0891	133.323	96.6971	129.982	97.6859
	137.073	95.9406	136.3	96.0881	133.502	96.6961	130.149	97.6873
	137.258	95.9389	136.479	96.0865	133.682	96.6955	130.316	97.6869
	137.441	95.937	136.659	96.0851	133.862	96.6949	130.484	97.6869
	137.624	95.9356	136.839	96.0836	134.04	96.6947	130.653	97.688
	137.806	95.9346	137.02	96.082	134.219	96.6939	130.824	97.6883
	137.988	95.9336	137.201	96.0807	134.396	96.693	130.996	97.6878
	138.17	95.9328	137.382	96.0798	134.572	96.6916	131.168	97.6889
	138.351	95.932	137.563	96.0781	134.748	96.69	131.341	97.6889
	138.533	95.9305	137.743	96.0762	134.923	96.6887	131.514	97.6872
	138.716	95.9285	137.923	96.0742	135.1	96.6875	131.688	97.685
	138.898	95.9262	138.101	96.0722	135.276	96.6866	131.861	97.683
	139.082	95.9236	138.279	96.0702	135.453	96.6862	132.034	97.6788
	139.267	95.9213	138.457	96.069	135.63	96.6863	132.207	97.6725
	139.452	95.9192	138.634	96.0677	135.807	96.6861	132.38	97.6657
	139.638	95.9178	138.81	96.0667	135.985	96.6861	132.552	97.6603
	139.825	95.9164	138.987	96.0659	136.163	96.6863	132.723	97.6569
	140.012	95.9153	139.162	96.0652	136.341	96.6861	132.894	97.656
	140.198	95.9135	139.335	96.0642	136.52	96.685	133.066	97.6573
	140.386	95.9121	139.509	96.063	136.698	96.6839	133.236	97.6588
	140.573	95.9103	139.682	96.0616	136.877	96.682	133.405	97.658
	140.761	95.909	139.856	96.0599	137.057	96.6796	133.572	97.6549
	140.948	95.9073	140.032	96.0577	137.237	96.6773	133.738	97.65
	141.136	95.9066	140.209	96.0569	137.418	96.6759	133.902	97.6468
	141.324	95.9052	140.387	96.0566	137.599	96.6742	134.065	97.6453
	141.511	95.9035	140.564	96.0572	137.78	96.6734	134.227	97.6434
	141.697	95.9014	140.741	96.058	137.962	96.6726	134.389	97.6409
	141.884	95.8995	140.919	96.0591	138.143	96.6718	134.55	97.6387
	142.069	95.8969	141.098	96.0591	138.324	96.671	134.711	97.6362
	142.254	95.8944	141.277	96.0585	138.505	96.6701	134.871	97.6343
	142.439	95.8919	141.457	96.0571	138.685	96.669	135.033	97.6347
	142.623	95.8899	141.638	96.0553	138.865	96.6683	135.196	97.6377
	142.806	95.8877	141.818	96.0534	139.044	96.6669	135.364	97.6421
	142.988	95.8858	141.998	96.0518	139.223	96.6653	135.535	97.6454
	143.17	95.8841	142.176	96.0499	139.401	96.6646	135.709	97.6471
	143.35	95.8823	142.353	96.0486	139.579	96.6637	135.884	97.6478
	143.531	95.8796	142.529	96.0476	139.756	96.6625	136.06	97.6462
	143.71	95.8768	142.704	96.0469	139.933	96.6617	136.237	97.6429
	143.89	95.8739	142.879	96.0458	140.11	96.6614	136.415	97.6405
	144.069	95.8715	143.055	96.0448	140.287	96.6602	136.593	97.639
	144.249	95.8694	143.23	96.0425	140.465	96.6589	136.772	97.6368
	144.428	95.8677	143.407	96.0393	140.643	96.6576	136.952	97.6347
	144.608	95.8662	143.585	96.0362	140.822	96.6562	137.132	97.6339
	144.788	95.8644	143.764	96.0334	141.001	96.6538	137.311	97.6321
	144.97	95.8622	143.943	96.0315	141.179	96.6507	137.489	97.6294
	145.153	95.8602	144.122	96.0305	141.355	96.6475	137.667	97.6272
	145.338	95.8582	144.302	96.0298	141.53	96.6449	137.843	97.6253
	145.525	95.8563	144.481	96.0288	141.702	96.6422	138.017	97.6219
	145.714	95.8544	144.66	96.0276	141.873	96.6396	138.19	97.62
	145.904	95.8521	144.84	96.0258	142.042	96.6377	138.363	97.6189
	146.096	95.8496	145.019	96.0239	142.211	96.6377	138.534	97.6175
	146.289	95.8469	145.199	96.0224	142.381	96.6387	138.704	97.6153
	146.481	95.8436	145.379	96.0205	142.553	96.64	138.871	97.6139
	146.673	95.8405	145.561	96.0182	142.725	96.6407	139.037	97.6103
	146.864	95.8373	145.742	96.016	142.899	96.6406	139.202	97.605
	147.055	95.8345	145.924	96.0139	143.074	96.6384	139.365	97.5981
	147.245	95.8319	146.106	96.0118	143.249	96.6344	139.529	97.5922
	147.435	95.8299	146.288	96.0106	143.426	96.6301	139.693	97.5882
	147.625	95.827	146.47	96.0096	143.603	96.6271	139.859	97.5865
	147.814	95.8243	146.652	96.0082	143.78	96.6253	140.025	97.5862
	148.002	95.8208	146.833	96.0067	143.958	96.6241	140.191	97.5881
	148.19	95.8167	147.014	96.0052	144.136	96.6235	140.358	97.5898
	148.378	95.813	147.194	96.0031	144.313	96.6229	140.524	97.5897
	148.564	95.8103	147.373	95.9999	144.49	96.6215	140.69	97.5907
	148.751	95.8081	147.551	95.997	144.667	96.6201	140.855	97.5941
	148.936	95.8055	147.727	95.9939	144.845	96.6181	141.021	97.5996
	149.12	95.8029	147.903	95.9901	145.024	96.6159	141.186	97.6059
	149.303	95.7997	148.079	95.9861	145.203	96.6142	141.352	97.6128
	149.487	95.796	148.256	95.9827	145.383	96.6133	141.516	97.6174
	149.672	95.792	148.431	95.9792	145.565	96.6118	141.681	97.6191
	149.857	95.7887	148.608	95.9759	145.75	96.6108	141.846	97.6175
	150.041	95.786	148.785	95.9733	145.937	96.6097	142.011	97.6154
	150.225	95.7833	148.962	95.9717	146.127	96.6077	142.177	97.6114
	150.408	95.7804	149.137	95.9703	146.321	96.6059	142.344	97.6066
	150.589	95.7772	149.313	95.969	146.516	96.605	142.513	97.6022
	150.77	95.7736	149.489	95.9671	146.712	96.6044	142.683	97.5998
	150.95	95.7697	149.664	95.9642	146.907	96.6027	142.854	97.5984
	151.128	95.7658	149.84	95.9608	147.101	96.6011	143.027	97.5984
	151.305	95.762	150.018	95.9576	147.294	96.5991	143.202	97.5993
	151.48	95.7585	150.198	95.9546	147.486	96.5965	143.378	97.5998
	151.656	95.7548	150.378	95.9519	147.678	96.5941	143.557	97.5988
	151.831	95.7509	150.558	95.9502	147.869	96.5933	143.737	97.5953
	152.007	95.7471	150.739	95.9488	148.059	96.5928	143.918	97.5902
	152.183	95.7433	150.92	95.9474	148.248	96.5924	144.1	97.5852
	152.36	95.7393	151.099	95.9454	148.435	96.5918	144.281	97.5808
	152.538	95.7356	151.279	95.9427	148.622	96.5904	144.46	97.5777
	152.717	95.732	151.459	95.94	148.807	96.5883	144.638	97.5764
	152.896	95.7275	151.641	95.9373	148.99	96.5859	144.815	97.5754
	153.076	95.7229	151.823	95.9344	149.172	96.5833	144.989	97.5731
	153.257	95.7188	152.008	95.9321	149.353	96.5804	145.162	97.5708
	153.437	95.7144	152.193	95.9309	149.534	96.5779	145.335	97.5675
	153.618	95.7099	152.379	95.9294	149.714	96.5753	145.505	97.5653
	153.799	95.7054	152.565	95.9276	149.895	96.5729	145.675	97.5655
	153.98	95.7009	152.751	95.9252	150.076	96.5705	145.843	97.5667
	154.163	95.6962	152.936	95.9219	150.255	96.5679	146.01	97.5657
	154.346	95.6912	153.123	95.9183	150.433	96.5648	146.176	97.5643
	154.529	95.6865	153.309	95.9148	150.611	96.5624	146.341	97.5628
	154.712	95.6826	153.495	95.9113	150.788	96.5598	146.507	97.5603
	154.893	95.6779	153.681	95.9082	150.964	96.5573	146.673	97.5575
	155.073	95.6736	153.869	95.9044	151.14	96.5552	146.838	97.5564
	155.251	95.6693	154.056	95.9006	151.316	96.5535	147.004	97.5571
	155.428	95.6652	154.242	95.8968	151.492	96.5513	147.172	97.5574
	155.604	95.6605	154.427	95.893	151.668	96.5492	147.339	97.5574
	155.78	95.656	154.608	95.8898	151.843	96.5471	147.506	97.5571
	155.957	95.6511	154.787	95.8877	152.018	96.5455	147.674	97.5559
	156.133	95.6462	154.963	95.885	152.193	96.5436	147.843	97.5521
	156.311	95.6408	155.138	95.8813	152.37	96.541	148.012	97.5474
	156.49	95.6356	155.312	95.8777	152.548	96.5387	148.182	97.5422
	156.667	95.6299	155.484	95.8731	152.729	96.5369	148.352	97.5377
	156.844	95.6239	155.656	95.8682	152.911	96.5349	148.521	97.5345
	157.021	95.6181	155.828	95.8637	153.097	96.5332	148.69	97.5345
	157.196	95.6119	155.998	95.8599	153.284	96.5322	148.86	97.5343
	157.371	95.6052	156.168	95.8562	153.474	96.5311	149.028	97.5331
	157.545	95.5994	156.337	95.8528	153.664	96.5293	149.196	97.5313
	157.718	95.5934	156.506	95.849	153.856	96.5263	149.364	97.529
	157.891	95.5874	156.676	95.8447	154.047	96.5227	149.531	97.524
	158.064	95.5812	156.846	95.8405	154.239	96.5187	149.698	97.5185
	158.237	95.5752	157.018	95.8363	154.43	96.5144	149.863	97.5144
	158.412	95.569	157.19	95.8326	154.621	96.5106	150.028	97.5109
	158.588	95.563	157.362	95.8293	154.812	96.5084	150.194	97.5067
	158.764	95.557	157.535	95.827	155.002	96.5075	150.359	97.5026
	158.941	95.5509	157.707	95.824	155.193	96.5066	150.523	97.4968
	159.118	95.5452	157.877	95.8205	155.382	96.506	150.688	97.4906
	159.296	95.5395	158.047	95.8164	155.571	96.5042	150.854	97.486
	159.473	95.5328	158.218	95.812	155.759	96.5014	151.02	97.4835
	159.65	95.5256	158.388	95.8074	155.946	96.4977	151.187	97.4825
	159.828	95.5192	158.559	95.8029	156.133	96.4944	151.354	97.4839
	160.007	95.5117	158.731	95.7987	156.319	96.4912	151.522	97.4856
	160.185	95.504	158.903	95.7944	156.506	96.4885	151.689	97.4856
	160.364	95.497	159.074	95.7905	156.695	96.4855	151.857	97.4842
	160.544	95.4902	159.245	95.7861	156.887	96.4824	152.024	97.4812
	160.725	95.483	159.416	95.7815	157.081	96.4791	152.191	97.4783
	160.905	95.4759	159.587	95.7768	157.279	96.4763	152.359	97.4749
	161.086	95.4691	159.759	95.7728	157.477	96.4736	152.526	97.4702
	161.265	95.4623	159.933	95.7681	157.677	96.4713	152.693	97.4648
	161.442	95.4547	160.107	95.7636	157.876	96.4685	152.862	97.4607
	161.619	95.4474	160.282	95.7595	158.074	96.4648	153.032	97.4575
	161.796	95.4403	160.458	95.7553	158.269	96.461	153.202	97.4548
	161.972	95.4326	160.633	95.7504	158.458	96.4575	153.374	97.4528
	162.149	95.4243	160.808	95.7452	158.642	96.4545	153.546	97.4515
	162.326	95.4161	160.981	95.74	158.819	96.4517	153.718	97.4498
	162.505	95.407	161.152	95.7349	158.991	96.4494	153.892	97.4465
	162.685	95.3984	161.321	95.7297	159.16	96.4457	154.066	97.4423
	162.868	95.3906	161.488	95.7244	159.327	96.4415	154.239	97.439
	163.052	95.3825	161.653	95.72	159.494	96.4364	154.412	97.4356
	163.239	95.3744	161.817	95.7154	159.662	96.4312	154.584	97.4321
	163.427	95.3667	161.98	95.71	159.832	96.4257	154.754	97.4293
	163.616	95.358	162.145	95.7044	160.002	96.4211	154.923	97.4263
	163.805	95.3489	162.311	95.6992	160.173	96.417	155.091	97.4204
	163.994	95.3404	162.481	95.6943	160.347	96.4127	155.258	97.4144
	164.183	95.3317	162.653	95.6893	160.521	96.4085	155.426	97.4092
	164.371	95.3232	162.828	95.684	160.696	96.4045	155.594	97.4048
	164.559	95.3154	163.005	95.6776	160.872	96.4008	155.762	97.4003
	164.748	95.3063	163.186	95.67	161.049	96.3974	155.929	97.3967
	164.937	95.2972	163.368	95.6616	161.226	96.3945	156.095	97.3934
	165.127	95.2884	163.552	95.653	161.404	96.3918	156.262	97.3891
	165.316	95.2789	163.738	95.6451	161.582	96.3884	156.428	97.3834
	165.504	95.2692	163.924	95.6388	161.759	96.3846	156.595	97.3784
	165.691	95.2595	164.111	95.6331	161.936	96.3805	156.762	97.3743
	165.878	95.25	164.297	95.627	162.111	96.3759	156.93	97.3712
	166.064	95.2407	164.482	95.6213	162.284	96.3713	157.098	97.3686
	166.25	95.231	164.666	95.6157	162.458	96.3668	157.265	97.3677
	166.436	95.221	164.847	95.6097	162.633	96.3625	157.433	97.3676
	166.621	95.2113	165.026	95.6038	162.812	96.3582	157.599	97.367
	166.805	95.2011	165.203	95.5985	162.994	96.3537	157.764	97.3639
	166.988	95.1898	165.379	95.5921	163.179	96.3489	157.929	97.3595
	167.169	95.1787	165.554	95.5855	163.368	96.3444	158.094	97.3544
	167.35	95.1679	165.728	95.5786	163.558	96.3399	158.259	97.3493
	167.531	95.1572	165.904	95.572	163.748	96.3354	158.426	97.3451
	167.713	95.1466	166.081	95.5653	163.939	96.3307	158.593	97.3424
	167.895	95.1359	166.259	95.5589	164.131	96.3254	158.761	97.3399
	168.078	95.1256	166.437	95.5519	164.322	96.3208	158.93	97.3362
	168.261	95.1141	166.616	95.5449	164.514	96.3157	159.098	97.3322
	168.444	95.1028	166.795	95.5377	164.706	96.3105	159.266	97.3278
	168.626	95.0919	166.973	95.5295	164.896	96.3055	159.434	97.3234
	168.808	95.0804	167.152	95.5216	165.084	96.3016	159.601	97.3198
	168.989	95.069	167.331	95.5137	165.269	96.2972	159.768	97.316
	169.171	95.0576	167.511	95.5061	165.451	96.2927	159.936	97.3115
	169.351	95.0462	167.69	95.4986	165.63	96.2874	160.103	97.3077
	169.532	95.0339	167.871	95.4918	165.807	96.2822	160.271	97.304
	169.712	95.0227	168.051	95.485	165.984	96.2763	160.44	97.2991
	169.891	95.0102	168.232	95.4779	166.161	96.2699	160.609	97.2932
	170.069	94.9984	168.411	95.4704	166.338	96.2638	160.779	97.2852
	170.247	94.9865	168.592	95.4623	166.516	96.2583	160.949	97.2742
	170.424	94.9746	168.771	95.4538	166.695	96.2531	161.119	97.2632
	170.601	94.9619	168.95	95.4449	166.874	96.2479	161.288	97.2536
	170.779	94.9499	169.128	95.4365	167.052	96.2432	161.457	97.2465
	170.956	94.9374	169.305	95.4285	167.231	96.2378	161.624	97.2418
	171.134	94.925	169.479	95.4216	167.408	96.232	161.791	97.2391
	171.312	94.9123	169.654	95.4152	167.584	96.2258	161.958	97.2361
	171.49	94.9001	169.828	95.4085	167.758	96.2195	162.123	97.2325
	171.67	94.8882	170.003	95.4012	167.931	96.2127	162.287	97.227
	171.849	94.8763	170.179	95.3933	168.105	96.2065	162.451	97.2204
	172.029	94.8643	170.355	95.3844	168.279	96.2007	162.614	97.2132
	172.211	94.8523	170.53	95.3751	168.452	96.195	162.777	97.2067
	172.393	94.8397	170.706	95.3659	168.625	96.1889	162.939	97.2016
	172.575	94.8265	170.88	95.3572	168.798	96.1826	163.102	97.1978
	172.756	94.8131	171.053	95.348	168.97	96.1756	163.265	97.1943
	172.937	94.8	171.226	95.3387	169.142	96.1693	163.429	97.1899
	173.116	94.7869	171.401	95.3294	169.316	96.1632	163.592	97.1847
	173.294	94.7741	171.575	95.32	169.49	96.1578	163.756	97.1789
	173.471	94.7609	171.752	95.3107	169.666	96.1525	163.921	97.1732
	173.647	94.7484	171.93	95.3015	169.842	96.1478	164.085	97.1685
	173.823	94.7353	172.109	95.2923	170.019	96.1428	164.248	97.165
	173.999	94.7224	172.288	95.2828	170.197	96.137	164.412	97.1612
	174.174	94.7089	172.467	95.2735	170.376	96.1303	164.576	97.156
	174.348	94.6956	172.645	95.264	170.555	96.1241	164.741	97.1492
	174.522	94.6824	172.822	95.2545	170.733	96.1175	164.907	97.1416
	174.696	94.6694	172.999	95.2451	170.908	96.1101	165.073	97.1351
	174.869	94.6566	173.175	95.2357	171.081	96.1031	165.237	97.1287
	175.043	94.6441	173.349	95.2263	171.251	96.0958	165.401	97.1216
	175.218	94.6316	173.524	95.2162	171.419	96.0891	165.564	97.1133
	175.393	94.6187	173.699	95.2064	171.586	96.0829	165.726	97.105
	175.568	94.6056	173.873	95.1965	171.754	96.0765	165.89	97.0972
	175.744	94.5925	174.048	95.1865	171.922	96.0704	166.055	97.0891
	175.921	94.5794	174.223	95.1762	172.09	96.0655	166.223	97.0822
	176.1	94.5664	174.399	95.1663	172.259	96.0601	166.391	97.078
	176.281	94.5532	174.575	95.1558	172.429	96.0531	166.559	97.0747
	176.464	94.5396	174.751	95.1452	172.601	96.0462	166.728	97.0696
	176.649	94.526	174.927	95.1343	172.776	96.0384	166.896	97.0637
	176.835	94.5125	175.103	95.1231	172.951	96.0304	167.064	97.0574
	177.02	94.4988	175.279	95.1115	173.128	96.0219	167.233	97.0512
	177.204	94.4856	175.455	95.1003	173.307	96.0145	167.401	97.0454
	177.389	94.4728	175.629	95.0893	173.488	96.0077	167.568	97.0397
	177.572	94.4598	175.803	95.0779	173.67	96.0006	167.735	97.0328
	177.753	94.4468	175.976	95.0667	173.854	95.9933	167.902	97.0251
	177.935	94.434	176.147	95.0557	174.041	95.9869	168.069	97.0194
	178.115	94.4208	176.318	95.0442	174.231	95.9808	168.236	97.0158
	178.296	94.4074	176.49	95.0321	174.422	95.9741	168.405	97.0136
	178.476	94.3945	176.662	95.0203	174.615	95.9679	168.575	97.014
	178.657	94.3814	176.835	95.0085	174.808	95.9608	168.747	97.014
	178.838	94.3687	177.009	94.9965	175.003	95.9531	168.919	97.0107
	179.017	94.3557	177.182	94.9846	175.197	95.9447	169.092	97.0056
	179.197	94.3428	177.356	94.9737	175.392	95.9369	169.264	96.9999
	179.376	94.3296	177.53	94.9633	175.586	95.9289	169.437	96.9939
	179.555	94.3168	177.705	94.953	175.778	95.9212	169.608	96.989
	179.735	94.3036	177.88	94.9425	175.967	95.9132	169.779	96.9847
	179.917	94.2913	178.056	94.9319	176.152	95.9055	169.948	96.9797
	180.101	94.279	178.232	94.9202	176.334	95.8978	170.115	96.9737
	180.286	94.2676	178.41	94.9081	176.512	95.8906	170.279	96.9659
	180.472	94.2563	178.588	94.8963	176.687	95.884	170.442	96.957
	180.659	94.2454	178.767	94.8846	176.859	95.8771	170.605	96.9463
	180.845	94.2344	178.946	94.8728	177.031	95.8703	170.766	96.934
	181.03	94.2236	179.126	94.8602	177.201	95.8629	170.927	96.922
	181.213	94.2124	179.304	94.8474	177.368	95.855	171.087	96.9117
	181.396	94.2008	179.482	94.8346	177.534	95.8471	171.248	96.9033
	181.577	94.1892	179.658	94.8216	177.699	95.8388	171.41	96.8968
	181.758	94.1774	179.833	94.8085	177.861	95.8302	171.573	96.893
	181.94	94.1653	180.008	94.7963	178.021	95.8218	171.738	96.8888
	182.122	94.1533	180.181	94.7835	178.181	95.8136	171.905	96.8823
	182.304	94.1421	180.354	94.7702	178.341	95.8052	172.074	96.8738
	182.486	94.1311	180.527	94.7579	178.502	95.7975	172.246	96.8643
	182.669	94.1203	180.699	94.746	178.663	95.7902	172.419	96.8546
	182.849	94.1094	180.87	94.7345	178.826	95.783	172.594	96.8469
	183.029	94.099	181.04	94.723	178.992	95.7755	172.77	96.8414
	183.208	94.0892	181.21	94.7111	179.16	95.7675	172.947	96.8369
	183.387	94.0799	181.381	94.6981	179.331	95.7594	173.124	96.8315
	183.567	94.0705	181.553	94.6847	179.505	95.7511	173.302	96.8233
	183.747	94.0614	181.726	94.6711	179.679	95.7422	173.478	96.8146
	183.927	94.0522	181.902	94.6584	179.853	95.7336	173.654	96.8071
	184.108	94.0423	182.08	94.6469	180.029	95.7249	173.827	96.8016
	184.288	94.0324	182.259	94.6352	180.205	95.717	173.998	96.7985
	184.467	94.023	182.439	94.6237	180.383	95.7087	174.168	96.7976
	184.647	94.0141	182.62	94.6121	180.563	95.7011	174.336	96.7956
	184.828	94.0047	182.802	94.5999	180.745	95.6931	174.503	96.7909
	185.01	93.9951	182.985	94.587	180.929	95.6854	174.668	96.783
	185.194	93.9857	183.169	94.5743	181.115	95.6771	174.833	96.7733
	185.378	93.9762	183.352	94.5617	181.3	95.6685	174.997	96.7635
	185.563	93.9664	183.536	94.5488	181.487	95.6599	175.16	96.7543
	185.748	93.9575	183.718	94.5357	181.673	95.6514	175.324	96.7469
	185.934	93.9488	183.899	94.5229	181.861	95.6434	175.488	96.7415
	186.119	93.9398	184.079	94.5098	182.051	95.6354	175.653	96.7377
	186.303	93.931	184.258	94.4974	182.243	95.6283	175.817	96.7328
	186.488	93.9225	184.436	94.4855	182.438	95.6219	175.98	96.7273
	186.672	93.914	184.614	94.4739	182.633	95.6167	176.142	96.7211
	186.856	93.906	184.791	94.4621	182.828	95.6124	176.304	96.7144
	187.042	93.8986	184.967	94.4505	183.02	95.6085	176.466	96.7075
	187.23	93.8905	185.143	94.4384	183.211	95.6037	176.628	96.7024
	187.418	93.8823	185.317	94.4257	183.397	95.5984	176.791	96.6979
	187.606	93.8742	185.491	94.4136	183.581	95.591	176.956	96.6938
	187.794	93.8655	185.665	94.4018	183.762	95.5826	177.123	96.6894
	187.98	93.8557	185.84	94.3898	183.939	95.5731	177.29	96.6838
	188.165	93.8463	186.015	94.3776	184.115	95.5632	177.459	96.6738
	188.348	93.8367	186.191	94.3655	184.289	95.5528	177.63	96.6603
	188.53	93.8272	186.368	94.3531	184.461	95.5432	177.802	96.6471
	188.712	93.8178	186.545	94.341	184.632	95.5329	177.974	96.6362
	188.893	93.8089	186.721	94.3285	184.801	95.5233	178.146	96.6276
	189.073	93.8012	186.897	94.3166	184.97	95.5147	178.319	96.623
	189.253	93.7931	187.072	94.305	185.138	95.5058	178.49	96.621
	189.433	93.7853	187.247	94.2935	185.306	95.4974	178.662	96.6174
	189.613	93.7783	187.422	94.2819	185.474	95.4889	178.834	96.6116
	189.792	93.7708	187.596	94.2706	185.642	95.4806	179.006	96.6044
	189.971	93.7625	187.772	94.2592	185.81	95.472	179.177	96.5974
	190.151	93.7549	187.948	94.2477	185.979	95.4642	179.347	96.5922
	190.33	93.7469	188.125	94.2364	186.149	95.4562	179.515	96.589
	190.508	93.7392	188.302	94.2253	186.319	95.449	179.683	96.5866
	190.685	93.7322	188.481	94.2151	186.49	95.4413	179.849	96.5844
	190.861	93.7256	188.659	94.2043	186.661	95.434	180.015	96.5812
	191.037	93.7187	188.838	94.1934	186.835	95.4268	180.181	96.5773
	191.214	93.7121	189.019	94.1819	187.01	95.4195	180.346	96.5722
	191.39	93.7051	189.201	94.1706	187.189	95.4117	180.512	96.5664
	191.568	93.6986	189.386	94.1591	187.371	95.4042	180.676	96.5598
	191.747	93.6916	189.572	94.149	187.556	95.3965	180.842	96.5531
	191.927	93.6851	189.759	94.1387	187.743	95.3885	181.007	96.5456
	192.109	93.6786	189.947	94.1303	187.933	95.3802	181.172	96.5376
	192.292	93.6723	190.135	94.1232	188.125	95.3725	181.338	96.5293
	192.478	93.665	190.324	94.1158	188.317	95.3647	181.504	96.5209
	192.664	93.6585	190.512	94.1082	188.508	95.3572	181.671	96.5123
	192.851	93.6518	190.701	94.0989	188.695	95.3504	181.838	96.506
	193.037	93.6446	190.889	94.0878	188.877	95.3434	182.004	96.5011
	193.221	93.6369	191.075	94.0761	189.055	95.336	182.169	96.4941
	193.404	93.6296	191.259	94.0646	189.23	95.3289	182.334	96.4856
	193.585	93.6223	191.443	94.0527	189.403	95.3214	182.497	96.4775
	193.765	93.6147	191.624	94.0429	189.575	95.3132	182.66	96.4685
	193.946	93.6073	191.804	94.0343	189.749	95.3056	182.823	96.4596
	194.127	93.6006	191.981	94.0245	189.922	95.2983	182.987	96.4533
	194.308	93.5936	192.156	94.0149	190.096	95.2908	183.152	96.4495
	194.49	93.5859	192.33	94.0052	190.269	95.2832	183.318	96.4464
	194.672	93.5787	192.503	93.9958	190.442	95.2761	183.485	96.4445
	194.855	93.5721	192.676	93.9864	190.615	95.269	183.653	96.4429
	195.037	93.5653	192.849	93.977	190.788	95.2618	183.824	96.4417
	195.22	93.5581	193.022	93.9667	190.962	95.2554	183.994	96.4402
	195.402	93.5519	193.194	93.9571	191.139	95.2497	184.164	96.4381
	195.583	93.5456	193.367	93.9471	191.318	95.2439	184.335	96.4339
	195.763	93.5386	193.539	93.9373	191.499	95.2386	184.506	96.4284
	195.944	93.5314	193.71	93.9288	191.683	95.2327	184.677	96.4229
	196.124	93.5249	193.882	93.9209	191.869	95.2263	184.848	96.4188
	196.303	93.518	194.056	93.9135	192.054	95.2199	185.019	96.4164
	196.481	93.5104	194.232	93.9059	192.239	95.2136	185.19	96.4149
	196.66	93.5028	194.408	93.8974	192.423	95.2066	185.36	96.4133
	196.84	93.4961	194.585	93.8895	192.604	95.2004	185.529	96.411
	197.02	93.489	194.761	93.8811	192.784	95.1944	185.698	96.4068
	197.202	93.4817	194.934	93.8728	192.963	95.1873	185.867	96.4015
	197.385	93.4752	195.105	93.8648	193.142	95.1803	186.035	96.3961
	197.569	93.4694	195.274	93.8572	193.322	95.174	186.202	96.3922
	197.754	93.4618	195.442	93.8491	193.503	95.1667	186.37	96.39
	197.938	93.4546	195.611	93.841	193.685	95.1589	186.537	96.389
	198.122	93.4481	195.78	93.8327	193.87	95.1517	186.702	96.3878
	198.303	93.4418	195.948	93.8243	194.055	95.1451	186.867	96.3856
	198.482	93.4344	196.118	93.8164	194.238	95.1381	187.032	96.3824
	198.66	93.4285	196.289	93.8084	194.417	95.1323	187.196	96.378
	198.837	93.4224	196.462	93.8006	194.589	95.1264	187.362	96.3727
	199.012	93.4162	196.636	93.7926	194.752	95.1208	187.528	96.366
	199.186	93.4094	196.811	93.7849	194.907	95.1152	187.696	96.3584
	199.361	93.4026	196.987	93.7772	195.057	95.1092	187.864	96.351
	199.536	93.3957	197.165	93.7695	195.202	95.103	188.034	96.3437
	199.713	93.3881	197.344	93.7622	195.345	95.0973	188.204	96.336
	199.891	93.3801	197.524	93.7546	195.489	95.0922	188.375	96.3281
	200.07	93.3732	197.707	93.7476	195.635	95.0885	188.546	96.3217
	200.251	93.3669	197.89	93.7403	195.783	95.0867	188.717	96.3164
	200.43	93.3598	198.072	93.7329	195.934	95.0871	188.888	96.3118
	200.61	93.3531	198.255	93.726	196.089	95.0879	189.058	96.3065
	200.789	93.3464	198.437	93.7195	196.247	95.0886	189.229	96.3027
	200.968	93.3387	198.617	93.7125	196.408	95.0877	189.401	96.3025
	201.147	93.3309	198.797	93.7057	196.574	95.0856	189.573	96.3036
	201.327	93.3238	198.975	93.6982	196.744	95.0814	189.746	96.3052
	201.509	93.3167	199.152	93.6912	196.919	95.0769	189.92	96.3082
	201.694	93.3095	199.328	93.6835	197.1	95.0724	190.095	96.3107
	201.882	93.303	199.502	93.6756	197.285	95.0679	190.271	96.3095
	202.073	93.2964	199.674	93.668	197.474	95.0633	190.448	96.306
	202.267	93.2895	199.846	93.6604	197.663	95.0597	190.625	96.3017
	202.462	93.2823	200.016	93.653	197.851	95.0563	190.802	96.2968
	202.659	93.2751	200.187	93.6467	198.039	95.0527	190.979	96.2923
	202.856	93.2674	200.361	93.6406	198.228	95.0489	191.156	96.2886
	203.053	93.2595	200.535	93.6341	198.416	95.0453	191.331	96.2851
	203.249	93.2515	200.711	93.6283	198.608	95.0422	191.506	96.282
	203.445	93.2442	200.888	93.6211	198.804	95.0384	191.681	96.2788
	203.64	93.2369	201.066	93.6138	199.004	95.0347	191.854	96.2748
	203.835	93.2295	201.243	93.6072	199.205	95.0312	192.025	96.2693
	204.031	93.2223	201.422	93.6004	199.406	95.0267	192.194	96.2636
	204.226	93.215	201.602	93.5941	199.605	95.0207	192.361	96.2582
	204.421	93.2065	201.784	93.5888	199.798	95.0151	192.526	96.2547
	204.613	93.1986	201.969	93.5828	199.987	95.009	192.689	96.2531
	204.804	93.1898	202.155	93.5762	200.172	95.0029	192.851	96.2519
	204.993	93.1807	202.342	93.5703	200.354	94.9978	193.013	96.2499
	205.18	93.1722	202.532	93.5637	200.534	94.9933	193.174	96.2457
	205.364	93.1641	202.722	93.5567	200.713	94.9886	193.337	96.2393
	205.547	93.1555	202.914	93.5504	200.893	94.9842	193.5	96.2326
	205.728	93.1478	203.108	93.5447	201.074	94.9794	193.664	96.2261
	205.906	93.1404	203.301	93.5381	201.255	94.9748	193.829	96.2192
	206.083	93.1324	203.494	93.5318	201.437	94.9706	193.996	96.2146
	206.258	93.1246	203.685	93.5256	201.619	94.9664	194.164	96.2135
	206.433	93.1171	203.875	93.5193	201.801	94.9617	194.333	96.2127
	206.609	93.1092	204.061	93.5123	201.984	94.9571	194.504	96.2096
	206.785	93.1013	204.244	93.5059	202.165	94.9533	194.676	96.2065
	206.962	93.0937	204.424	93.4993	202.344	94.9488	194.85	96.2036
	207.14	93.0853	204.602	93.4929	202.522	94.944	195.025	96.1994
	207.321	93.0764	204.777	93.4868	202.697	94.9398	195.2	96.1941
	207.505	93.0679	204.95	93.4805	202.872	94.9358	195.375	96.1905
	207.692	93.0591	205.122	93.474	203.045	94.9308	195.552	96.1886
	207.881	93.0494	205.292	93.4679	203.22	94.9258	195.729	96.1865
	208.073	93.0401	205.462	93.4608	203.396	94.9214	195.905	96.1839
	208.264	93.0306	205.631	93.4532	203.574	94.9169	196.082	96.1825
	208.453	93.0217	205.8	93.4454	203.754	94.9128	196.257	96.1815
	208.641	93.0124	205.971	93.4384	203.937	94.9083	196.43	96.1794
	208.827	93.0033	206.142	93.4319	204.122	94.9034	196.6	96.1761
	209.011	92.9941	206.316	93.4264	204.309	94.8984	196.769	96.1721
	209.194	92.9845	206.492	93.4202	204.498	94.894	196.936	96.1673
	209.377	92.9742	206.669	93.4146	204.689	94.8892	197.103	96.1627
	209.558	92.9638	206.845	93.4082	204.879	94.8854	197.269	96.1594
	209.741	92.9534	207.022	93.4007	205.068	94.8824	197.436	96.1566
	209.923	92.9432	207.199	93.3932	205.256	94.8793	197.602	96.1524
	210.106	92.933	207.376	93.3863	205.44	94.8758	197.769	96.1467
	210.29	92.9231	207.553	93.379	205.621	94.8723	197.936	96.1416
	210.475	92.9137	207.73	93.372	205.8	94.8681	198.105	96.1362
	210.658	92.9039	207.908	93.3651	205.978	94.864	198.273	96.1313
	210.84	92.8946	208.087	93.3579	206.156	94.8598	198.442	96.1274
	211.022	92.8847	208.265	93.351	206.333	94.8553	198.611	96.1236
	211.203	92.874	208.442	93.3444	206.511	94.8504	198.779	96.1183
	211.384	92.8628	208.618	93.3372	206.691	94.8456	198.945	96.1132
	211.565	92.852	208.792	93.3299	206.872	94.8406	199.11	96.1089
	211.746	92.8408	208.964	93.3221	207.055	94.836	199.273	96.1051
	211.925	92.8302	209.135	93.3139	207.24	94.8317	199.436	96.1019
	212.103	92.8199	209.305	93.3055	207.429	94.8282	199.597	96.0957
	212.28	92.8094	209.476	93.2976	207.618	94.8248	199.757	96.0873
	212.455	92.7991	209.647	93.2903	207.808	94.8213	199.917	96.079
	212.628	92.7881	209.818	93.2827	207.998	94.8173	200.077	96.073
	212.801	92.7766	209.989	93.2754	208.186	94.8127	200.239	96.0681
	212.973	92.7643	210.162	93.2684	208.372	94.8067	200.403	96.0657
	213.146	92.7531	210.338	93.2609	208.558	94.801	200.567	96.0651
	213.319	92.7412	210.515	93.2537	208.745	94.7952	200.732	96.0637
	213.493	92.7292	210.694	93.247	208.932	94.7897	200.898	96.0602
	213.667	92.7174	210.875	93.2398	209.119	94.7844	201.065	96.0562
	213.84	92.7055	211.056	93.2333	209.306	94.7802	201.232	96.0536
	214.014	92.6927	211.237	93.2263	209.489	94.7758	201.4	96.0504
	214.19	92.6801	211.417	93.2184	209.668	94.7709	201.57	96.0454
	214.367	92.6679	211.597	93.2108	209.844	94.7652	201.742	96.039
	214.545	92.655	211.777	93.2029	210.017	94.7602	201.915	96.0332
	214.724	92.6426	211.957	93.1949	210.188	94.7545	202.09	96.0269
	214.903	92.6297	212.137	93.1882	210.361	94.7486	202.266	96.021
	215.083	92.616	212.317	93.1823	210.533	94.7426	202.443	96.0162
	215.263	92.6021	212.496	93.176	210.708	94.7376	202.619	96.0127
	215.442	92.5885	212.676	93.1697	210.886	94.7318	202.796	96.0094
	215.621	92.575	212.855	93.1622	211.065	94.7258	202.973	96.0064
	215.8	92.5613	213.036	93.1531	211.245	94.7201	203.149	96.0032
	215.981	92.5481	213.219	93.1441	211.425	94.7145	203.324	95.9993
	216.162	92.5346	213.404	93.1355	211.605	94.7083	203.497	95.9944
	216.345	92.521	213.591	93.1269	211.785	94.7029	203.669	95.9889
	216.53	92.5063	213.779	93.1184	211.965	94.6984	203.839	95.9837
	216.717	92.4918	213.967	93.11	212.145	94.6934	204.007	95.9791
	216.905	92.4775	214.155	93.101	212.325	94.6883	204.173	95.9756
	217.095	92.463	214.342	93.0919	212.504	94.6833	204.337	95.9716
	217.285	92.4485	214.527	93.083	212.682	94.6761	204.501	95.9669
	217.477	92.4337	214.71	93.0742	212.86	94.6683	204.664	95.96
	217.671	92.4186	214.891	93.0655	213.036	94.6611	204.828	95.9497
	217.864	92.4027	215.071	93.0569	213.211	94.6547	204.992	95.9398
	218.058	92.3865	215.248	93.0475	213.384	94.647	205.157	95.9324
	218.251	92.3705	215.424	93.0384	213.556	94.6397	205.324	95.9267
	218.443	92.3545	215.6	93.0285	213.729	94.6316	205.493	95.9223
	218.633	92.338	215.777	93.0197	213.903	94.6236	205.664	95.9198
	218.822	92.3218	215.953	93.0103	214.079	94.6149	205.835	95.918
	219.009	92.3055	216.13	93.0014	214.257	94.6077	206.007	95.9156
	219.195	92.2882	216.307	92.9921	214.439	94.602	206.179	95.9127
	219.379	92.2702	216.483	92.9836	214.62	94.5974	206.351	95.9092
	219.561	92.2527	216.657	92.9745	214.803	94.5921	206.522	95.9042
	219.742	92.234	216.831	92.9658	214.985	94.5859	206.693	95.896
	219.922	92.2151	217.005	92.9573	215.165	94.5784	206.865	95.8859
	220.101	92.1969	217.18	92.9482	215.343	94.5695	207.038	95.8758
	220.279	92.1792	217.355	92.9393	215.518	94.5599	207.21	95.8687
	220.455	92.1609	217.532	92.9296	215.691	94.5507	207.384	95.8618
	220.63	92.1432	217.709	92.9191	215.861	94.5431	207.556	95.8568
	220.804	92.126	217.885	92.9075	216.03	94.5367	207.728	95.8542
	220.977	92.1081	218.062	92.8959	216.197	94.5306	207.897	95.8531
	221.149	92.0893	218.24	92.8842	216.362	94.525	208.066	95.8501
	221.322	92.0707	218.419	92.8727	216.527	94.5195	208.235	95.849
	221.495	92.0523	218.599	92.8624	216.692	94.5123	208.402	95.8482
	221.67	92.0328	218.78	92.853	216.86	94.5049	208.57	95.8453
	221.845	92.0129	218.962	92.8433	217.032	94.4972	208.738	95.8407
	222.023	91.9932	219.144	92.8335	217.211	94.4888	208.906	95.8357
	222.202	91.9735	219.325	92.824	217.399	94.4803	209.073	95.8312
	222.383	91.9529	219.507	92.8132	217.594	94.4724	209.241	95.8266
	222.565	91.9325	219.688	92.8025	217.795	94.4646	209.409	95.8222
	222.75	91.9123	219.869	92.7914	218.001	94.4569	209.579	95.8172
	222.936	91.8922	220.049	92.7809	218.209	94.4493	209.751	95.8123
	223.123	91.8716	220.23	92.7698	218.417	94.4408	209.925	95.806
	223.312	91.8506	220.409	92.7588	218.621	94.4322	210.101	95.7987
	223.502	91.8291	220.587	92.7471	218.818	94.4231	210.279	95.7917
	223.691	91.8073	220.765	92.7359	219.005	94.4123	210.457	95.7853
	223.88	91.7847	220.942	92.7244	219.181	94.4022	210.635	95.7793
	224.07	91.7619	221.118	92.7126	219.346	94.3947	210.812	95.7734
	224.26	91.7393	221.292	92.7011	219.501	94.3884	210.988	95.7682
	224.449	91.7167	221.466	92.6895	219.649	94.3811	211.162	95.7639
	224.639	91.6939	221.639	92.6777	219.794	94.3748	211.336	95.7597
	224.829	91.6712	221.81	92.6646	219.939	94.3676	211.507	95.7538
	225.018	91.6484	221.98	92.6517	220.086	94.3582	211.678	95.7485
	225.206	91.625	222.15	92.6383	220.236	94.3463	211.847	95.7445
	225.392	91.6012	222.321	92.6253	220.392	94.3347	212.016	95.74
	225.577	91.5772	222.492	92.6122	220.553	94.3232	212.185	95.7349
	225.759	91.5527	222.664	92.6	220.721	94.3124	212.353	95.7304
	225.94	91.5281	222.838	92.5875	220.898	94.3018	212.521	95.7247
	226.12	91.5033	223.012	92.575	221.082	94.2931	212.689	95.7177
	226.296	91.4782	223.188	92.562	221.272	94.2859	212.856	95.7112
	226.472	91.4529	223.366	92.5491	221.465	94.2786	213.021	95.7055
	226.649	91.4273	223.546	92.5354	221.658	94.2708	213.187	95.7016
	226.825	91.4014	223.727	92.5218	221.851	94.2618	213.351	95.6988
	227.003	91.375	223.909	92.5081	222.043	94.2519	213.514	95.6949
	227.184	91.3485	224.091	92.4943	222.234	94.2414	213.678	95.6898
	227.367	91.3219	224.271	92.4798	222.425	94.2313	213.843	95.6838
	227.551	91.2952	224.451	92.4654	222.617	94.2207	214.009	95.6759
	227.738	91.2679	224.628	92.4506	222.811	94.2108	214.178	95.6677
	227.926	91.2406	224.804	92.4356	223.006	94.2005	214.348	95.6607
	228.113	91.2128	224.979	92.4206	223.205	94.1901	214.521	95.6533
	228.302	91.1839	225.154	92.4062	223.406	94.1793	214.693	95.6443
	228.489	91.1552	225.327	92.3918	223.61	94.1686	214.866	95.6362
	228.675	91.126	225.499	92.3773	223.815	94.1582	215.037	95.6279
	228.86	91.0964	225.67	92.3623	224.02	94.1479	215.208	95.619
	229.046	91.0666	225.839	92.3468	224.225	94.1371	215.378	95.61
	229.23	91.0376	226.008	92.3301	224.428	94.1267	215.547	95.6027
	229.415	91.0081	226.177	92.314	224.628	94.1162	215.713	95.5955
	229.598	90.9788	226.345	92.2976	224.826	94.1047	215.878	95.5895
	229.781	90.9491	226.514	92.281	225.021	94.0934	216.042	95.5835
	229.964	90.9189	226.683	92.2646	225.21	94.0816	216.204	95.5765
	230.146	90.8881	226.852	92.2486	225.393	94.0687	216.366	95.5678
	230.327	90.8565	227.021	92.232	225.57	94.0564	216.529	95.5587
	230.509	90.8244	227.189	92.2154	225.741	94.0447	216.692	95.5492
	230.691	90.7926	227.358	92.199	225.91	94.0326	216.855	95.5416
	230.874	90.7608	227.527	92.1822	226.077	94.0207	217.018	95.536
	231.057	90.7285	227.697	92.1653	226.245	94.009	217.182	95.5325
	231.239	90.6962	227.868	92.1483	226.415	93.9971	217.346	95.5294
	231.42	90.6637	228.042	92.1312	226.589	93.9845	217.511	95.5265
	231.599	90.6307	228.218	92.1136	226.767	93.9718	217.678	95.5231
	231.777	90.5974	228.399	92.0961	226.949	93.9588	217.845	95.5196
	231.954	90.5634	228.584	92.0783	227.135	93.9458	218.013	95.5145
	232.13	90.5292	228.773	92.0602	227.321	93.9326	218.182	95.5087
	232.306	90.4948	228.965	92.0422	227.506	93.9196	218.354	95.5001
	232.483	90.46	229.159	92.0242	227.687	93.9067	218.527	95.4901
	232.661	90.4249	229.352	92.0058	227.864	93.8941	218.701	95.4797
	232.841	90.39	229.546	91.9874	228.036	93.8817	218.875	95.4694
	233.022	90.3549	229.738	91.9689	228.203	93.8688	219.05	95.4587
	233.205	90.3195	229.929	91.9501	228.368	93.8557	219.223	95.449
	233.387	90.2837	230.117	91.9309	228.531	93.8418	219.396	95.4392
	233.568	90.2474	230.302	91.9116	228.696	93.8275	219.57	95.4292
	233.748	90.2106	230.484	91.8916	228.862	93.8128	219.743	95.4202
	233.927	90.1734	230.663	91.8706	229.03	93.7985	219.917	95.4123
	234.106	90.136	230.838	91.8494	229.201	93.7846	220.092	95.405
	234.284	90.0983	231.012	91.8286	229.373	93.7711	220.268	95.3996
	234.463	90.0603	231.183	91.8076	229.547	93.758	220.444	95.3953
	234.641	90.0223	231.353	91.7868	229.723	93.745	220.622	95.3895
	234.82	89.9838	231.521	91.7665	229.899	93.7317	220.799	95.3823
	234.999	89.9451	231.688	91.7459	230.076	93.7182	220.976	95.3739
	235.179	89.9061	231.854	91.7247	230.253	93.7048	221.153	95.3638
	235.359	89.8669	232.02	91.7034	230.43	93.6905	221.329	95.3505
	235.541	89.8273	232.187	91.682	230.607	93.676	221.503	95.3357
	235.722	89.7877	232.356	91.6605	230.784	93.6617	221.677	95.3231
	235.905	89.7477	232.526	91.6387	230.96	93.6471	221.849	95.3151
	236.087	89.7073	232.698	91.6171	231.136	93.6326	222.019	95.3093
	236.271	89.666	232.871	91.5954	231.311	93.6187	222.186	95.3043
	236.454	89.6242	233.046	91.5732	231.488	93.6047	222.352	95.2999
	236.638	89.5821	233.222	91.5507	231.664	93.59	222.517	95.2923
	236.822	89.5394	233.4	91.528	231.84	93.5747	222.681	95.2789
	237.005	89.497	233.581	91.505	232.016	93.5589	222.845	95.2648
	237.188	89.4548	233.765	91.4815	232.192	93.543	223.011	95.2532
	237.37	89.4124	233.95	91.4581	232.368	93.5267	223.178	95.2452
	237.551	89.3704	234.137	91.4345	232.546	93.5107	223.347	95.2394
	237.733	89.3284	234.323	91.4109	232.727	93.4948	223.518	95.2348
	237.914	89.2859	234.509	91.387	232.913	93.4793	223.692	95.2289
	238.096	89.2428	234.695	91.3635	233.101	93.4635	223.868	95.2209
	238.278	89.1999	234.88	91.339	233.293	93.4479	224.045	95.2104
	238.459	89.1561	235.065	91.3146	233.487	93.4323	224.222	95.1984
	238.641	89.112	235.25	91.2895	233.682	93.4164	224.399	95.1866
	238.822	89.0676	235.433	91.2635	233.876	93.4005	224.574	95.1741
	239.003	89.0227	235.615	91.237	234.068	93.3847	224.748	95.1615
	239.186	88.9771	235.795	91.2105	234.257	93.3687	224.92	95.1496
	239.369	88.9312	235.973	91.1832	234.443	93.3526	225.091	95.1397
	239.553	88.8854	236.151	91.1565	234.627	93.3362	225.259	95.1311
	239.737	88.8395	236.328	91.13	234.806	93.3197	225.427	95.1228
	239.921	88.7937	236.505	91.1031	234.983	93.3032	225.593	95.1137
	240.106	88.7479	236.682	91.0763	235.156	93.2865	225.758	95.105
	240.29	88.7021	236.856	91.0496	235.326	93.2697	225.923	95.0959
	240.473	88.6556	237.028	91.0226	235.495	93.2535	226.089	95.0861
	240.657	88.609	237.198	90.9962	235.664	93.2369	226.254	95.0772
	240.839	88.5619	237.365	90.9694	235.834	93.2198	226.42	95.0693
	241.021	88.5143	237.531	90.9423	236.007	93.2027	226.586	95.0576
	241.201	88.4666	237.698	90.915	236.184	93.1853	226.754	95.0437
	241.38	88.419	237.866	90.887	236.363	93.1673	226.922	95.0301
	241.56	88.3706	238.036	90.8582	236.545	93.1494	227.09	95.0151
	241.741	88.3224	238.207	90.8295	236.726	93.132	227.259	94.9989
	241.926	88.2742	238.38	90.8007	236.905	93.1143	227.429	94.9853
	242.114	88.2251	238.554	90.7716	237.081	93.0957	227.598	94.9741
	242.306	88.1759	238.729	90.7421	237.254	93.0771	227.768	94.9627
	242.501	88.127	238.904	90.7116	237.423	93.0581	227.938	94.9525
	242.695	88.078	239.08	90.6799	237.587	93.0393	228.111	94.9424
	242.889	88.0286	239.257	90.6479	237.746	93.0204	228.287	94.9308
	243.081	87.9792	239.435	90.6161	237.902	93.0019	228.465	94.9172
	243.272	87.9293	239.614	90.5849	238.058	92.9839	228.643	94.9042
	243.461	87.8795	239.793	90.5545	238.216	92.9666	228.821	94.8906
	243.648	87.8296	239.973	90.5247	238.378	92.9493	228.996	94.8795
	243.835	87.7793	240.153	90.4946	238.546	92.9326	229.168	94.8714
	244.021	87.7285	240.332	90.4632	238.719	92.9155	229.337	94.863
	244.207	87.6776	240.511	90.4316	238.897	92.8974	229.505	94.8528
	244.393	87.6269	240.69	90.3997	239.079	92.8788	229.671	94.8407
	244.58	87.5761	240.867	90.368	239.266	92.8599	229.835	94.8268
	244.767	87.5254	241.043	90.3358	239.456	92.8402	229.999	94.8127
	244.952	87.4754	241.219	90.3041	239.647	92.8208	230.163	94.801
	245.135	87.4251	241.394	90.2716	239.836	92.8016	230.327	94.7898
	245.315	87.374	241.568	90.2389	240.022	92.7812	230.491	94.7801
	245.491	87.3221	241.742	90.2057	240.202	92.76	230.656	94.7713
	245.663	87.2703	241.917	90.1725	240.378	92.739	230.822	94.7605
	245.833	87.2183	242.093	90.1393	240.55	92.7179	230.988	94.7473
	246.001	87.166	242.269	90.1061	240.721	92.6967	231.155	94.7334
	246.169	87.1132	242.447	90.0728	240.891	92.6754	231.324	94.7182
	246.337	87.0606	242.624	90.039	241.062	92.6547	231.494	94.7007
	246.508	87.0081	242.801	90.0052	241.235	92.6339	231.664	94.6849
	246.682	86.956	242.979	89.9705	241.406	92.6138	231.834	94.6712
	246.86	86.9039	243.157	89.9357	241.577	92.5935	232.004	94.6583
	247.04	86.8523	243.335	89.9004	241.746	92.5731	232.172	94.646
	247.223	86.8009	243.513	89.8652	241.914	92.5522	232.339	94.6351
	247.408	86.7488	243.69	89.8301	242.081	92.5308	232.506	94.624
	247.594	86.6956	243.867	89.795	242.248	92.5086	232.672	94.61
	247.781	86.6427	244.045	89.7596	242.415	92.4868	232.839	94.5949
	247.968	86.5898	244.223	89.7243	242.581	92.4659	233.009	94.5803
	248.156	86.5365	244.402	89.6884	242.747	92.4447	233.18	94.5656
	248.343	86.4831	244.583	89.652	242.916	92.4236	233.353	94.5491
	248.53	86.43	244.763	89.6151	243.087	92.4019	233.528	94.5324
	248.717	86.3765	244.943	89.5777	243.261	92.3796	233.704	94.5149
	248.903	86.3227	245.122	89.5402	243.438	92.3568	233.879	94.4968
	249.088	86.2695	245.3	89.5027	243.617	92.3335	234.053	94.48
	249.273	86.2161	245.476	89.465	243.797	92.3102	234.224	94.4638
	249.456	86.1628	245.652	89.4275	243.978	92.2879	234.393	94.4492
	249.638	86.1094	245.827	89.3901	244.159	92.265	234.559	94.4366
	249.818	86.056	246	89.3525	244.34	92.2416	234.722	94.426
	249.996	86.0021	246.174	89.315	244.522	92.2199	234.883	94.4139
	250.173	85.948	246.347	89.2777	244.703	92.2004	235.043	94.401
	250.349	85.8942	246.522	89.24	244.884	92.1811	235.202	94.3871
	250.524	85.8408	246.698	89.2018	245.066	92.1676	235.362	94.3734
	250.697	85.7875	246.875	89.1627	245.248	92.1589	235.524	94.3582
	250.868	85.7344	247.053	89.123	245.432	92.148	235.687	94.3438
	251.037	85.6816	247.232	89.0828	245.615	92.1322	235.851	94.3302
	251.205	85.6286	247.412	89.0422	245.799	92.1161	236.017	94.3174
	251.371	85.5754	247.592	89.002	245.982	92.0974	236.185	94.3037
	251.539	85.5222	247.772	88.9625	246.166	92.0771	236.352	94.288
	251.708	85.4688	247.953	88.9233	246.347	92.0567	236.522	94.2709
	251.878	85.4158	248.132	88.8834	246.529	92.0377	236.692	94.2534
	252.051	85.3635	248.31	88.8438	246.711	92.0173	236.863	94.2352
	252.225	85.3107	248.488	88.8037	246.893	91.9935	237.033	94.2161
	252.401	85.2578	248.666	88.7629	247.076	91.9662	237.204	94.1983
	252.58	85.2054	248.842	88.7218	247.258	91.9388	237.373	94.1807
	252.76	85.1529	249.02	88.681	247.44	91.9118	237.541	94.163
	252.941	85.1002	249.198	88.6398	247.62	91.8848	237.708	94.1462
	253.123	85.0472	249.375	88.5985	247.8	91.8578	237.876	94.1286
	253.304	84.9948	249.553	88.5572	247.977	91.8309	238.046	94.1106
	253.485	84.942	249.732	88.5155	248.154	91.8044	238.218	94.0932
	253.666	84.8896	249.909	88.4739	248.329	91.778	238.393	94.0757
	253.844	84.8371	250.086	88.4317	248.504	91.7522	238.571	94.0578
	254.021	84.7852	250.262	88.3894	248.678	91.7257	238.75	94.0406
	254.196	84.733	250.438	88.3469	248.852	91.6996	238.929	94.0237
	254.37	84.6812	250.614	88.3043	249.026	91.6736	239.107	94.0059
	254.544	84.6296	250.789	88.2608	249.198	91.6474	239.283	93.9876
	254.717	84.5773	250.963	88.218	249.369	91.6201	239.457	93.9693
	254.89	84.5247	251.136	88.175	249.539	91.5929	239.629	93.9532
	255.063	84.4721	251.308	88.1319	249.711	91.5657	239.8	93.9375
	255.236	84.4199	251.479	88.0893	249.884	91.5381	239.968	93.9223
	255.41	84.3676	251.65	88.0464	250.06	91.5106	240.135	93.9076
	255.583	84.3162	251.821	88.0033	250.239	91.4832	240.3	93.8929
	255.759	84.2651	251.993	87.9601	250.422	91.4558	240.464	93.8756
	255.936	84.2135	252.167	87.9167	250.606	91.4283	240.628	93.8566
	256.115	84.1607	252.341	87.8733	250.792	91.4004	240.791	93.8377
	256.297	84.1078	252.515	87.8297	250.978	91.3728	240.954	93.8198
	256.479	84.0546	252.689	87.786	251.162	91.3454	241.117	93.8012
	256.662	84.0018	252.863	87.7418	251.343	91.3175	241.28	93.783
	256.846	83.9498	253.037	87.6976	251.52	91.289	241.445	93.7664
	257.029	83.8987	253.212	87.6527	251.695	91.2607	241.61	93.7495
	257.214	83.8476	253.387	87.6082	251.866	91.2324	241.777	93.7307
	257.4	83.7972	253.563	87.5635	252.036	91.2049	241.945	93.7117
	257.587	83.7461	253.738	87.5188	252.209	91.1791	242.113	93.692
	257.775	83.6946	253.914	87.4743	252.383	91.1532	242.282	93.6715
	257.963	83.6434	254.09	87.4309	252.56	91.1264	242.452	93.6514
	258.151	83.5919	254.268	87.3882	252.74	91.0987	242.622	93.6319
	258.339	83.5398	254.448	87.3456	252.923	91.0701	242.793	93.6125
	258.525	83.4882	254.629	87.3031	253.105	91.0408	242.965	93.5921
	258.709	83.4374	254.81	87.2605	253.288	91.0117	243.137	93.5692
	258.892	83.3864	254.991	87.2165	253.471	90.9823	243.309	93.5429
	259.072	83.3356	255.171	87.1716	253.653	90.9525	243.482	93.5171
	259.251	83.285	255.349	87.1265	253.837	90.9217	243.654	93.4932
	259.427	83.2346	255.528	87.081	254.021	90.8896	243.826	93.4716
	259.602	83.1836	255.706	87.0349	254.204	90.857	243.998	93.4513
	259.777	83.1324	255.884	86.9892	254.387	90.8248	244.17	93.4327
	259.952	83.0816	256.063	86.9437	254.569	90.793	244.342	93.4139
	260.127	83.0306	256.241	86.8973	254.75	90.7613	244.513	93.3932
	260.302	82.9799	256.42	86.8509	254.93	90.7296	244.683	93.3714
	260.478	82.9298	256.598	86.8045	255.112	90.698	244.851	93.3508
	260.653	82.8802	256.775	86.7576	255.294	90.6665	245.018	93.3309
	260.827	82.8306	256.952	86.7107	255.478	90.635	245.182	93.3114
	261.003	82.7822	257.13	86.6644	255.664	90.604	245.345	93.2917
	261.18	82.7339	257.306	86.6181	255.851	90.5729	245.507	93.2708
	261.359	82.6859	257.482	86.5721	256.039	90.5409	245.669	93.2485
	261.542	82.6381	257.658	86.5263	256.225	90.5078	245.831	93.2255
	261.728	82.5904	257.831	86.4804	256.41	90.4741	245.994	93.2027
	261.916	82.5432	258.004	86.4344	256.595	90.4402	246.157	93.1798
	262.106	82.4964	258.176	86.3883	256.781	90.4067	246.321	93.1576
	262.295	82.4498	258.35	86.3422	256.966	90.3739	246.484	93.1364
	262.484	82.4032	258.524	86.2963	257.148	90.3416	246.649	93.1162
	262.67	82.3573	258.7	86.2505	257.325	90.3092	246.814	93.0956
	262.855	82.3113	258.876	86.2044	257.494	90.2766	246.979	93.0747
	263.038	82.2656	259.053	86.1586	257.655	90.2433	247.145	93.054
	263.218	82.2197	259.23	86.1123	257.807	90.2099	247.312	93.0336
	263.398	82.1742	259.41	86.0656	257.953	90.1775	247.481	93.0116
	263.577	82.1288	259.591	86.0188	258.095	90.1456	247.65	92.9885
	263.758	82.084	259.772	85.9722	258.234	90.1132	247.822	92.9664
	263.94	82.0389	259.953	85.9261	258.373	90.08	247.994	92.9454
	264.123	81.9942	260.132	85.8789	258.514	90.0457	248.165	92.9244
	264.307	81.9494	260.31	85.8314	258.656	90.0099	248.338	92.9039
	264.49	81.9048	260.485	85.7836	258.803	89.9739	248.508	92.8823
	264.672	81.8601	260.658	85.7358	258.955	89.9383	248.679	92.8562
	264.854	81.8159	260.828	85.6881	259.112	89.9032	248.849	92.8268
	265.034	81.7716	260.997	85.6422	259.274	89.8693	249.019	92.7965
	265.214	81.7279	261.164	85.5975	259.442	89.836	249.188	92.7677
	265.393	81.684	261.333	85.553	259.615	89.803	249.357	92.7421
	265.571	81.6402	261.503	85.5082	259.791	89.7697	249.525	92.7195
	265.749	81.5966	261.675	85.4618	259.971	89.7366	249.692	92.6971
	265.927	81.5534	261.847	85.4139	260.154	89.7025	249.858	92.6753
	266.104	81.51	262.021	85.3653	260.34	89.6681	250.022	92.6511
	266.28	81.4671	262.194	85.3163	260.526	89.6334	250.184	92.6238
	266.455	81.4242	262.367	85.2674	260.712	89.5986	250.343	92.5966
	266.629	81.3815	262.541	85.2201	260.898	89.5636	250.501	92.5709
	266.802	81.339	262.714	85.1738	261.084	89.529	250.658	92.5457
	266.975	81.297	262.889	85.1279	261.271	89.4948	250.816	92.5215
	267.149	81.2556	263.064	85.083	261.46	89.4601	250.978	92.4988
	267.324	81.2146	263.24	85.0381	261.654	89.4258	251.142	92.4763
	267.501	81.174	263.417	84.9925	261.849	89.3914	251.31	92.4551
	267.679	81.1329	263.596	84.9471	262.045	89.3569	251.481	92.4332
	267.858	81.092	263.774	84.9013	262.239	89.3214	251.655	92.4107
	268.037	81.0509	263.952	84.8545	262.427	89.2861	251.829	92.3873
	268.216	81.0105	264.13	84.8084	262.609	89.2497	252.006	92.3628
	268.394	80.9703	264.307	84.7623	262.786	89.2128	252.185	92.3364
	268.57	80.9311	264.485	84.7159	262.961	89.1743	252.364	92.3101
	268.744	80.8924	264.663	84.6689	263.139	89.1352	252.542	92.2847
	268.917	80.8537	264.841	84.6217	263.32	89.0971	252.719	92.2594
	269.088	80.8157	265.02	84.5734	263.506	89.0597	252.896	92.2346
	269.259	80.778	265.197	84.5258	263.694	89.0228	253.072	92.2102
	269.432	80.7405	265.374	84.478	263.884	88.9871	253.247	92.1844
	269.607	80.7029	265.551	84.4306	264.074	88.9525	253.42	92.1564
	269.784	80.6658	265.727	84.3841	264.262	88.9169	253.591	92.1271
	269.961	80.6282	265.901	84.338	264.449	88.8814	253.76	92.098
	270.139	80.5915	266.076	84.2915	264.633	88.8457	253.926	92.069
	270.316	80.5547	266.249	84.2455	264.813	88.8107	254.09	92.0407
	270.491	80.5184	266.419	84.1995	264.991	88.7751	254.253	92.014
	270.667	80.4825	266.588	84.1532	265.169	88.7393	254.417	91.9887
	270.842	80.447	266.756	84.1072	265.347	88.7031	254.58	91.9631
	271.016	80.4113	266.922	84.061	265.526	88.6671	254.743	91.9373
	271.191	80.3755	267.086	84.0144	265.709	88.6314	254.905	91.9107
	271.365	80.3396	267.251	83.9682	265.896	88.5967	255.067	91.8815
	271.54	80.3041	267.416	83.9222	266.085	88.5629	255.228	91.8497
	271.716	80.2689	267.582	83.8761	266.276	88.5287	255.387	91.8175
	271.893	80.2338	267.747	83.8308	266.468	88.4939	255.545	91.7866
	272.071	80.1995	267.914	83.7862	266.659	88.4589	255.702	91.7562
	272.249	80.1657	268.08	83.7418	266.848	88.423	255.861	91.7278
	272.427	80.1322	268.249	83.6972	267.036	88.3864	256.019	91.7018
	272.605	80.0987	268.42	83.6526	267.22	88.3504	256.179	91.6772
	272.78	80.0663	268.594	83.608	267.402	88.3154	256.341	91.6517
	272.955	80.0341	268.769	83.5635	267.579	88.2798	256.505	91.6269
	273.13	80.0023	268.946	83.5191	267.752	88.2446	256.67	91.6015
	273.305	79.9707	269.124	83.4755	267.921	88.2094	256.837	91.5741
	273.481	79.9394	269.301	83.4323	268.087	88.1739	257.006	91.5452
	273.657	79.9077	269.48	83.3894	268.251	88.1381	257.176	91.5167
	273.834	79.8766	269.658	83.3466	268.415	88.1029	257.349	91.4879
	274.01	79.8464	269.837	83.3041	268.58	88.0676	257.522	91.4598
	274.185	79.8162	270.014	83.2618	268.748	88.0326	257.696	91.4334
	274.36	79.7865	270.19	83.2202	268.917	87.9979	257.87	91.4073
	274.535	79.7567	270.365	83.1787	269.089	87.9631	258.044	91.3809
	274.709	79.7275	270.539	83.1368	269.264	87.928	258.217	91.3541
	274.882	79.6981	270.713	83.0952	269.441	87.8926	258.39	91.3264
	275.056	79.669	270.888	83.0534	269.618	87.8577	258.563	91.296
	275.231	79.6401	271.064	83.0124	269.796	87.8226	258.736	91.2636
	275.406	79.612	271.24	82.9719	269.974	87.7877	258.908	91.2303
	275.583	79.5842	271.418	82.9342	270.152	87.7533	259.08	91.1968
	275.761	79.5564	271.598	82.8984	270.332	87.7195	259.252	91.1631
	275.94	79.5293	271.779	82.8647	270.513	87.6854	259.423	91.1312
	276.12	79.5023	271.96	82.8298	270.695	87.6514	259.594	91.1012
	276.299	79.4753	272.14	82.7938	270.879	87.6175	259.764	91.0707
	276.478	79.4487	272.319	82.7559	271.062	87.5836	259.933	91.0399
	276.657	79.4226	272.495	82.7157	271.244	87.5492	260.103	91.0092
	276.834	79.3964	272.67	82.6748	271.424	87.5145	260.272	90.9782
	277.011	79.3711	272.843	82.6339	271.601	87.4799	260.442	90.9467
	277.188	79.3458	273.017	82.5943	271.775	87.4455	260.614	90.9165
	277.366	79.3205	273.191	82.5554	271.948	87.4115	260.785	90.8876
	277.545	79.2953	273.368	82.518	272.121	87.3779	260.956	90.8583
	277.724	79.2706	273.546	82.4802	272.292	87.3449	261.126	90.8278
	277.904	79.2456	273.727	82.4438	272.462	87.312	261.295	90.7985
	278.083	79.221	273.909	82.408	272.632	87.2792	261.463	90.769
	278.263	79.1967	274.09	82.3729	272.802	87.2462	261.63	90.7396
	278.443	79.173	274.27	82.3375	272.972	87.2134	261.797	90.7111
	278.623	79.1494	274.448	82.3029	273.142	87.1809	261.964	90.6828
	278.803	79.1267	274.624	82.2679	273.312	87.1489	262.131	90.6538
	278.982	79.104	274.798	82.2319	273.483	87.1173	262.296	90.6249
	279.159	79.0814	274.971	82.1953	273.655	87.0861	262.46	90.5941
	279.335	79.0583	275.143	82.1576	273.829	87.055	262.623	90.5622
	279.51	79.0359	275.313	82.1187	274.005	87.0237	262.786	90.5308
	279.684	79.0138	275.483	82.0793	274.182	86.9918	262.949	90.499
	279.857	78.9926	275.652	82.0409	274.359	86.9599	263.113	90.4664
	280.03	78.9721	275.822	82.0036	274.536	86.9276	263.278	90.4345
	280.205	78.9522	275.992	81.968	274.71	86.8951	263.444	90.4043
	280.381	78.9323	276.163	81.9339	274.883	86.8637	263.61	90.3752
	280.559	78.9124	276.336	81.9015	275.055	86.8333	263.776	90.3459
	280.738	78.8933	276.511	81.8696	275.225	86.8036	263.942	90.3163
	280.918	78.8739	276.687	81.8381	275.395	86.7739	264.109	90.2859
	281.098	78.8546	276.863	81.8067	275.566	86.7451	264.277	90.2546
	281.279	78.8354	277.039	81.7752	275.737	86.7152	264.445	90.2223
	281.46	78.8165	277.212	81.7436	275.909	86.6853	264.615	90.189
	281.64	78.797	277.384	81.712	276.079	86.6545	264.785	90.1557
	281.821	78.7776	277.554	81.6804	276.245	86.624	264.956	90.123
	282	78.7588	277.722	81.6498	276.406	86.5934	265.128	90.0897
	282.179	78.7411	277.888	81.6201	276.56	86.5634	265.301	90.0549
	282.356	78.7236	278.055	81.5913	276.708	86.5335	265.473	90.0221
	282.535	78.7069	278.222	81.5633	276.852	86.5041	265.646	89.9914
	282.712	78.6904	278.39	81.5348	276.993	86.4752	265.817	89.9622
	282.889	78.6732	278.559	81.5062	277.134	86.447	265.986	89.9356
	283.066	78.6557	278.729	81.4771	277.277	86.4183	266.154	89.912
	283.244	78.6391	278.899	81.4485	277.422	86.3778	266.318	89.8868
	283.42	78.6218	279.07	81.4199	277.572	86.3263	266.48	89.8588
	283.598	78.606	279.242	81.3919	277.725	86.2727	266.641	89.8289
	283.774	78.5904	279.415	81.3639	277.881	86.2186	266.803	89.7972
	283.95	78.5745	279.591	81.3365	278.041	86.1659	266.965	89.7651
	284.124	78.5581	279.768	81.3095	278.204	86.1262	267.13	89.7328
	284.298	78.5419	279.947	81.2834	278.37	86.0987	267.296	89.7006
	284.471	78.5256	280.127	81.2577	278.537	86.0732	267.464	89.6696
	284.644	78.51	280.309	81.2325	278.706	86.0484	267.633	89.6392
	284.818	78.4948	280.492	81.2073	278.873	86.0237	267.804	89.6081
	284.993	78.4809	280.675	81.1819	279.036	85.9988	267.974	89.5773
	285.17	78.4672	280.86	81.156	279.194	85.9733	268.145	89.5469
	285.349	78.4537	281.042	81.1303	279.346	85.9481	268.315	89.5163
	285.529	78.44	281.224	81.1048	279.494	85.9224	268.485	89.4848
	285.711	78.4274	281.403	81.0795	279.639	85.8958	268.653	89.4528
	285.892	78.4135	281.579	81.0548	279.784	85.8709	268.821	89.4218
	286.073	78.401	281.755	81.0296	279.93	85.8514	268.989	89.3912
	286.253	78.388	281.929	81.0045	280.078	85.8357	269.156	89.3591
	286.433	78.3755	282.102	80.9801	280.229	85.8224	269.324	89.3258
	286.612	78.3625	282.275	80.9562	280.385	85.8109	269.492	89.2925
	286.791	78.3509	282.446	80.931	280.546	85.798	269.66	89.2594
	286.968	78.3378	282.615	80.9065	280.712	85.7806	269.829	89.2266
	287.143	78.3254	282.782	80.8825	280.881	85.7597	269.999	89.1952
	287.318	78.3128	282.947	80.8586	281.053	85.7365	270.169	89.1659
	287.491	78.3012	283.112	80.8343	281.228	85.7123	270.34	89.1366
	287.665	78.2894	283.276	80.8102	281.405	85.6877	270.51	89.1054
	287.84	78.2784	283.44	80.786	281.584	85.6629	270.681	89.0726
	288.016	78.2681	283.604	80.7622	281.766	85.6391	270.85	89.0406
	288.193	78.2577	283.767	80.7389	281.949	85.6158	271.017	89.0102
	288.368	78.2472	283.928	80.7163	282.134	85.5924	271.183	88.9804
	288.541	78.2367	284.088	80.6952	282.319	85.5692	271.347	88.9517
	288.709	78.226	284.248	80.6747	282.502	85.5455	271.51	88.9215
	288.875	78.2144	284.408	80.6539	282.685	85.5214	271.674	88.8852
	289.039	78.2038	284.569	80.6324	282.866	85.497	271.838	88.8449
	289.204	78.1925	284.732	80.611	283.047	85.4729	272.002	88.8062
	289.372	78.1814	284.895	80.5893	283.228	85.449	272.167	88.7686
	289.543	78.1712	285.058	80.5676	283.411	85.4263	272.333	88.7341
	289.717	78.1619	285.221	80.5472	283.596	85.4036	272.497	88.7052
	289.893	78.1521	285.385	80.5273	283.783	85.3815	272.66	88.6785
	290.072	78.1432	285.551	80.5079	283.969	85.3597	272.823	88.6517
	290.252	78.1342	285.72	80.4887	284.154	85.3379	272.985	88.6249
	290.432	78.1248	285.89	80.4695	284.339	85.3157	273.146	88.5975
	290.613	78.115	286.062	80.4498	284.524	85.2936	273.306	88.5695
	290.793	78.1054	286.234	80.4301	284.712	85.2717	273.467	88.5402
	290.974	78.0957	286.405	80.4109	284.899	85.25	273.628	88.5095
	291.153	78.0871	286.578	80.3923	285.087	85.2285	273.789	88.4787
	291.331	78.0776	286.751	80.3741	285.273	85.2069	273.951	88.4489
	291.509	78.0689	286.926	80.3563	285.455	85.1859	274.114	88.4202
	291.687	78.0605	287.106	80.3387	285.634	85.1646	274.28	88.3922
	291.864	78.0516	287.288	80.3209	285.809	85.1435	274.447	88.3639
	292.044	78.0429	287.474	80.3033	285.982	85.1221	274.616	88.334
	292.224	78.0357	287.664	80.2862	286.153	85.1011	274.786	88.3025
	292.404	78.0277	287.857	80.2695	286.323	85.0798	274.957	88.2702
	292.586	78.0199	288.051	80.2526	286.492	85.059	275.129	88.2396
	292.767	78.0124	288.244	80.2354	286.66	85.0385	275.302	88.21
	292.947	78.0044	288.435	80.2185	286.828	85.0186	275.476	88.1821
	293.126	77.9959	288.623	80.2016	286.998	84.9984	275.65	88.154
	293.303	77.9883	288.805	80.1849	287.168	84.9784	275.824	88.1241
	293.477	77.9807	288.982	80.1686	287.341	84.9581	275.996	88.0932
	293.649	77.9725	289.156	80.1527	287.515	84.9378	276.166	88.0624
	293.818	77.9651	289.329	80.1362	287.691	84.9176	276.335	88.0323
	293.987	77.9578	289.504	80.1204	287.867	84.8982	276.5	88.0006
	294.156	77.9498	289.681	80.1046	288.044	84.8785	276.663	87.9673
	294.326	77.9424	289.861	80.0892	288.223	84.8589	276.824	87.933
	294.499	77.9358	290.042	80.0741	288.402	84.839	276.986	87.9005
	294.676	77.9288	290.223	80.0594	288.583	84.819	277.147	87.8693
	294.856	77.9213	290.404	80.0446	288.764	84.7987	277.309	87.8417
	295.04	77.9149	290.583	80.0297	288.946	84.7782	277.471	87.8162
	295.227	77.9084	290.76	80.0147	289.129	84.7567	277.635	87.7922
	295.416	77.9019	290.935	79.9995	289.313	84.7352	277.798	87.7668
	295.605	77.8947	291.109	79.9848	289.496	84.7147	277.962	87.7397
	295.795	77.8889	291.285	79.9701	289.679	84.6946	278.127	87.7129
	295.983	77.8826	291.461	79.9558	289.861	84.6753	278.293	87.6878
	296.169	77.876	291.639	79.9414	290.043	84.6575	278.461	87.6631
	296.354	77.8694	291.816	79.9274	290.226	84.6399	278.63	87.6375
	296.537	77.8633	291.993	79.913	290.408	84.6218	278.799	87.6131
	296.719	77.8563	292.165	79.8989	290.59	84.6031	278.97	87.5888
	296.901	77.8487	292.336	79.8848	290.772	84.585	279.143	87.5659
	297.082	77.8419	292.504	79.8707	290.949	84.5671	279.316	87.5431
	297.261	77.8354	292.673	79.8573	291.124	84.5498	279.492	87.5211
	297.439	77.8286	292.844	79.8447	291.294	84.5324	279.669	87.498
	297.615	77.8215	293.016	79.8318	291.463	84.5149	279.847	87.4739
	297.789	77.8158	293.188	79.819	291.632	84.4969	280.025	87.4485
	297.961	77.8098	293.362	79.807	291.804	84.4788	280.203	87.4232
	298.132	77.8036	293.534	79.7949	291.978	84.4606	280.38	87.3968
	298.304	77.7972	293.707	79.7822	292.155	84.4424	280.556	87.3709
	298.477	77.7919	293.882	79.7701	292.333	84.4248	280.73	87.3447
	298.652	77.7865	294.058	79.7584	292.511	84.4074	280.902	87.3191
	298.832	77.7811	294.236	79.7466	292.688	84.3905	281.072	87.2931
	299.014	77.7744	294.416	79.735	292.865	84.3732	281.241	87.2677
	299.197	77.7683	294.597	79.7246	293.04	84.3553	281.408	87.2412
	299.381	77.7621	294.779	79.7144	293.215	84.3374	281.574	87.2144
	299.564	77.7561	294.962	79.7041	293.389	84.3192	281.737	87.188
	299.745	77.7496	295.144	79.6939	293.562	84.3012	281.898	87.1605
	299.925	77.744	295.327	79.6834	293.732	84.2838	282.059	87.1308
	300.103	77.7385	295.507	79.672	293.901	84.2672	282.218	87.1017
	300.279	77.7331	295.687	79.6603	294.069	84.2505	282.377	87.0742
	300.454	77.7272	295.866	79.6491	294.235	84.2344	282.537	87.0465
	300.63	77.7219	296.042	79.6382	294.402	84.2182	282.695	87.0228
	300.808	77.7169	296.216	79.6278	294.569	84.2021	282.854	87.0017
	300.988	77.7117	296.387	79.6174	294.738	84.1861	283.014	86.98
	301.171	77.7059	296.556	79.6073	294.909	84.1708	283.174	86.9573
	301.358	77.6999	296.721	79.5969	295.081	84.1555	283.335	86.9346
	301.548	77.6936	296.886	79.5866	295.254	84.1403	283.498	86.9104
	301.741	77.6882	297.05	79.5765	295.428	84.1245	283.663	86.8877
	301.935	77.6833	297.216	79.5672	295.602	84.1088	283.83	86.8683
	302.129	77.6786	297.382	79.5576	295.778	84.0929	283.999	86.8515
	302.323	77.6737	297.551	79.5484	295.955	84.0769	284.169	86.8353
	302.513	77.6687	297.721	79.539	296.132	84.061	284.341	86.8192
	302.698	77.6632	297.891	79.5292	296.309	84.0456	284.515	86.8013
	302.878	77.6577	298.061	79.5186	296.486	84.0307	284.689	86.7808
	303.053	77.652	298.233	79.5081	296.661	84.016	284.863	86.7581
	303.223	77.6468	298.403	79.4979	296.836	84.0015	285.038	86.7362
	303.39	77.6417	298.572	79.4883	297.008	83.9879	285.214	86.7151
	303.555	77.6367	298.739	79.4796	297.176	83.9737	285.389	86.6947
	303.718	77.6315	298.903	79.4714	297.34	83.9582	285.562	86.6749
	303.88	77.6268	299.068	79.4641	297.498	83.9427	285.734	86.6549
	304.041	77.6215	299.233	79.4564	297.652	83.9288	285.904	86.6341
	304.202	77.6164	299.403	79.4487	297.803	83.9148	286.071	86.6109
	304.362	77.6111	299.575	79.4406	297.954	83.9009	286.238	86.5874
	304.522	77.6056	299.75	79.4323	298.108	83.8877	286.405	86.5646
	304.682	77.5994	299.927	79.424	298.265	83.8744	286.571	86.543
	304.843	77.5937	300.103	79.4161	298.427	83.8594	286.736	86.5216
	305.004	77.5884	300.278	79.4085	298.594	83.8441	286.902	86.5016
	305.168	77.5835	300.453	79.4008	298.765	83.8294	287.068	86.483
	305.336	77.579	300.627	79.3929	298.939	83.8162	287.232	86.4624
	305.507	77.5745	300.799	79.3847	299.115	83.8044	287.395	86.4376
	305.681	77.57	300.971	79.3762	299.292	83.7934	287.558	86.4129
	305.856	77.5652	301.141	79.3682	299.467	83.7828	287.719	86.3909
	306.032	77.5603	301.311	79.3603	299.642	83.7716	287.879	86.366
	306.208	77.5555	301.481	79.353	299.815	83.7598	288.04	86.3416
	306.383	77.5512	301.651	79.3461	299.987	83.7466	288.201	86.3213
	306.557	77.5469	301.822	79.3395	300.158	83.7334	288.363	86.3022
	306.73	77.5422	301.993	79.332	300.33	83.7196	288.526	86.2818
	306.902	77.5374	302.164	79.3247	300.504	83.7067	288.691	86.2638
	307.072	77.5324	302.335	79.3175	300.682	83.6942	288.857	86.2463
	307.24	77.5277	302.506	79.3102	300.862	83.6822	289.026	86.2283
	307.406	77.5224	302.678	79.3032	301.044	83.6694	289.198	86.212
	307.569	77.5172	302.851	79.2963	301.226	83.6567	289.372	86.1964
	307.731	77.5124	303.028	79.2894	301.409	83.6443	289.549	86.182
	307.893	77.5076	303.207	79.2828	301.592	83.6317	289.728	86.1698
	308.055	77.5026	303.385	79.276	301.777	83.6192	289.909	86.1579
	308.219	77.4984	303.562	79.2689	301.964	83.6072	290.089	86.1428
	308.384	77.4938	303.734	79.262	302.152	83.5955	290.269	86.1258
	308.552	77.4891	303.902	79.255	302.342	83.5836	290.447	86.1081
	308.721	77.4843	304.066	79.2481	302.531	83.5714	290.623	86.0888
	308.894	77.4796	304.228	79.2416	302.718	83.5595	290.796	86.0695
	309.07	77.4754	304.389	79.2348	302.903	83.5479	290.969	86.0517
	309.25	77.4714	304.552	79.2279	303.088	83.5365	291.141	86.0347
	309.434	77.4673	304.714	79.2215	303.271	83.5249	291.312	86.0183
	309.622	77.463	304.877	79.2149	303.452	83.5135	291.482	86.0033
	309.811	77.4589	305.042	79.2083	303.633	83.5022	291.652	85.9882
	310.002	77.4548	305.207	79.2021	303.811	83.4902	291.82	85.9717
	310.19	77.4515	305.374	79.1966	303.987	83.4776	291.988	85.9548
	310.377	77.4478	305.543	79.1909	304.162	83.4649	292.156	85.9375
	310.561	77.444	305.713	79.1854	304.336	83.4522	292.322	85.9202
	310.742	77.4401	305.884	79.1796	304.509	83.4396	292.488	85.9017
	310.918	77.4356	306.056	79.1733	304.683	83.4276	292.653	85.8812
	311.089	77.4305	306.228	79.1671	304.859	83.4161	292.816	85.8596
	311.254	77.4259	306.401	79.1609	305.034	83.4048	292.977	85.8379
	311.415	77.4214	306.574	79.1544	305.211	83.3938	293.138	85.8152
	311.572	77.4164	306.749	79.1481	305.388	83.3827	293.297	85.7929
	311.728	77.4116	306.925	79.1426	305.564	83.3713	293.456	85.7758
	311.887	77.4069	307.101	79.1372	305.738	83.3599	293.613	85.7624
	312.05	77.4025	307.277	79.1313	305.911	83.3484	293.771	85.7503
	312.219	77.3982	307.451	79.1262	306.082	83.3365	293.929	85.74
	312.392	77.3935	307.624	79.1219	306.254	83.3246	294.086	85.7308
	312.568	77.3886	307.795	79.1172	306.427	83.3136	294.244	85.7179
	312.745	77.384	307.965	79.1117	306.602	83.3028	294.404	85.7023
	312.923	77.3795	308.134	79.1073	306.78	83.293	294.566	85.6865
	313.1	77.3749	308.304	79.1024	306.959	83.2835	294.73	85.6708
	313.278	77.3709	308.475	79.0965	307.139	83.2739	294.897	85.6564
	313.457	77.3668	308.648	79.0904	307.317	83.2638	295.065	85.6451
	313.637	77.3627	308.822	79.085	307.494	83.2536	295.234	85.6356
	313.816	77.3587	308.997	79.0795	307.669	83.2426	295.404	85.6259
	313.995	77.355	309.172	79.0739	307.843	83.2316	295.574	85.6157
	314.173	77.3512	309.349	79.0689	308.019	83.2207	295.745	85.6041
	314.349	77.348	309.53	79.0641	308.195	83.21	295.917	85.5915
	314.524	77.3442	309.714	79.0584	308.372	83.1995	296.089	85.5778
	314.698	77.3397	309.901	79.052	308.55	83.1886	296.261	85.5645
	314.871	77.3358	310.093	79.046	308.73	83.1781	296.432	85.5508
	315.044	77.3316	310.286	79.0396	308.909	83.1674	296.604	85.5386
	315.216	77.327	310.479	79.0328	309.089	83.1566	296.774	85.5257
	315.389	77.323	310.669	79.0268	309.269	83.1464	296.944	85.5124
	315.563	77.3191	310.857	79.0216	309.448	83.1368	297.113	85.4986
	315.739	77.3143	311.039	79.0173	309.627	83.1268	297.28	85.4842
	315.915	77.3095	311.217	79.0133	309.804	83.1174	297.446	85.4687
	316.093	77.305	311.392	79.0098	309.979	83.1076	297.61	85.4519
	316.271	77.3006	311.565	79.007	310.152	83.0971	297.774	85.4349
	316.447	77.2965	311.738	79.0046	310.322	83.0866	297.939	85.4187
	316.622	77.2919	311.911	79.0016	310.489	83.0759	298.104	85.4041
	316.794	77.288	312.085	78.9989	310.653	83.0652	298.271	85.3897
	316.964	77.2837	312.259	78.996	310.814	83.055	298.439	85.3737
	317.133	77.2793	312.433	78.9918	310.975	83.0451	298.607	85.358
	317.305	77.2751	312.608	78.987	311.135	83.0354	298.776	85.3451
	317.479	77.2713	312.782	78.9822	311.297	83.0259	298.945	85.3351
	317.656	77.2669	312.956	78.9774	311.461	83.0163	299.115	85.3267
	317.837	77.263	313.127	78.9723	311.628	83.0069	299.284	85.3222
	318.019	77.2592	313.297	78.9677	311.797	82.9981	299.453	85.3177
	318.2	77.2552	313.463	78.9626	311.968	82.9894	299.621	85.3086
	318.381	77.2513	313.625	78.957	312.14	82.9806	299.786	85.2946
	318.562	77.248	313.784	78.9513	312.311	82.9718	299.946	85.2784
	318.744	77.2448	313.942	78.9463	312.48	82.9624	300.105	85.2636
	318.926	77.2412	314.099	78.9411	312.649	82.9523	300.263	85.2514
	319.112	77.2373	314.258	78.936	312.815	82.9422	300.421	85.2416
	319.299	77.2338	314.421	78.9314	312.981	82.9324	300.582	85.2335
	319.488	77.2301	314.587	78.9272	313.148	82.9224	300.745	85.226
	319.678	77.2262	314.757	78.9229	313.316	82.9123	300.91	85.2164
	319.866	77.2227	314.929	78.9176	313.486	82.9029	301.076	85.2061
	320.05	77.219	315.103	78.9127	313.658	82.8938	301.242	85.1942
	320.231	77.2147	315.278	78.9078	313.83	82.8842	301.408	85.1819
	320.409	77.2101	315.452	78.9022	314	82.8752	301.575	85.1715
	320.586	77.2056	315.625	78.8968	314.168	82.8666	301.742	85.1628
	320.762	77.2011	315.798	78.8923	314.337	82.858	301.909	85.1535
	320.937	77.1967	315.972	78.8881	314.504	82.8487	302.078	85.1446
	321.111	77.1925	316.145	78.8841	314.673	82.8398	302.248	85.1367
	321.281	77.1883	316.319	78.8806	314.843	82.8304	302.418	85.128
	321.447	77.1837	316.494	78.8762	315.013	82.8213	302.59	85.1176
	321.609	77.179	316.67	78.8718	315.183	82.8123	302.762	85.1067
	321.769	77.1746	316.847	78.868	315.354	82.803	302.933	85.0964
	321.928	77.1707	317.024	78.8641	315.524	82.7944	303.102	85.0866
	322.09	77.167	317.202	78.8603	315.695	82.786	303.269	85.0768
	322.254	77.1631	317.378	78.8571	315.867	82.7772	303.435	85.0678
	322.419	77.159	317.551	78.8535	316.041	82.7683	303.601	85.0593
	322.588	77.1551	317.723	78.8485	316.218	82.7599	303.767	85.0494
	322.756	77.1512	317.892	78.843	316.398	82.7512	303.935	85.0369
	322.924	77.1472	318.058	78.8372	316.58	82.7435	304.105	85.0235
	323.091	77.1434	318.224	78.831	316.763	82.7361	304.275	85.0097
	323.257	77.139	318.39	78.8257	316.945	82.7285	304.446	84.9955
	323.423	77.1348	318.557	78.8212	317.125	82.7209	304.618	84.9834
	323.589	77.1303	318.721	78.8172	317.304	82.7127	304.792	84.9738
	323.756	77.1256	318.884	78.8138	317.48	82.7039	304.966	84.9659
	323.925	77.1213	319.046	78.81	317.654	82.6952	305.143	84.9586
	324.096	77.1178	319.208	78.8056	317.828	82.6862	305.321	84.9528
	324.269	77.1137	319.37	78.8007	318.003	82.6777	305.499	84.947
	324.442	77.1095	319.535	78.7953	318.179	82.6688	305.676	84.9415
	324.617	77.1057	319.703	78.7898	318.355	82.66	305.852	84.935
	324.791	77.1024	319.876	78.7853	318.533	82.6509	306.025	84.9287
	324.967	77.0985	320.054	78.7815	318.71	82.6419	306.194	84.9223
	325.144	77.0951	320.235	78.7773	318.886	82.6311	306.36	84.9155
	325.321	77.0913	320.419	78.7729	319.06	82.6212	306.522	84.909
	325.497	77.0871	320.605	78.7687	319.233	82.6105	306.681	84.9029
	325.671	77.0828	320.791	78.7644	319.405	82.6001	306.839	84.8951
	325.843	77.0784	320.975	78.7597	319.578	82.5897	306.994	84.885
	326.013	77.0736	321.159	78.7559	319.75	82.5808	307.15	84.874
	326.182	77.0694	321.341	78.7519	319.921	82.5719	307.306	84.8632
	326.352	77.065	321.52	78.7475	320.092	82.5638	307.463	84.8535
	326.524	77.0603	321.698	78.7429	320.263	82.5558	307.621	84.8468
	326.699	77.0562	321.871	78.7385	320.433	82.5482	307.78	84.8425
	326.876	77.0527	322.042	78.7335	320.603	82.5413	307.94	84.839
	327.054	77.0489	322.21	78.7295	320.773	82.5342	308.102	84.8343
	327.231	77.0454	322.375	78.7257	320.944	82.5261	308.264	84.8283
	327.407	77.0419	322.54	78.722	321.115	82.5175	308.428	84.8209
	327.583	77.0379	322.704	78.7181	321.284	82.5084	308.592	84.8128
	327.758	77.0332	322.868	78.7143	321.455	82.4993	308.756	84.8047
	327.931	77.0288	323.034	78.7104	321.625	82.4906	308.921	84.7971
	328.103	77.0247	323.203	78.7064	321.796	82.4829	309.088	84.7883
	328.272	77.0207	323.374	78.702	321.969	82.4748	309.255	84.7801
	328.438	77.017	323.55	78.6967	322.143	82.4669	309.423	84.7724
	328.604	77.0137	323.73	78.6917	322.319	82.4586	309.591	84.7638
	328.77	77.0096	323.911	78.6871	322.496	82.4502	309.759	84.7549
	328.937	77.0057	324.091	78.6821	322.675	82.4417	309.925	84.7462
	329.105	77.0018	324.269	78.6768	322.853	82.433	310.09	84.7364
	329.273	76.9973	324.445	78.6725	323.032	82.4246	310.254	84.7271
	329.442	76.9927	324.615	78.6685	323.21	82.4159	310.416	84.7169
	329.611	76.9887	324.782	78.6644	323.388	82.4066	310.579	84.706
	329.78	76.9842	324.948	78.6602	323.565	82.3975	310.741	84.696
	329.95	76.9798	325.114	78.6559	323.742	82.3889	310.904	84.689
	330.12	76.9762	325.284	78.652	323.918	82.38	311.067	84.6816
	330.291	76.9724	325.46	78.6475	324.093	82.3707	311.231	84.6759
	330.464	76.9688	325.643	78.6428	324.266	82.362	311.394	84.6717
	330.64	76.9655	325.834	78.6384	324.437	82.3535	311.558	84.6683
	330.819	76.9621	326.029	78.6342	324.604	82.345	311.722	84.6637
	331	76.9579	326.225	78.6299	324.769	82.3367	311.886	84.659
	331.183	76.9539	326.418	78.6261	324.931	82.329	312.052	84.6534
	331.365	76.9503	326.607	78.6227	325.093	82.3208	312.217	84.6477
	331.545	76.946	326.788	78.6189	325.255	82.3126	312.384	84.6407
	331.724	76.942	326.963	78.6144	325.418	82.3044	312.552	84.6325
	331.901	76.9384	327.132	78.61	325.583	82.2961	312.722	84.6234
	332.075	76.9341	327.298	78.6048	325.75	82.2876	312.892	84.6152
	332.249	76.9293	327.461	78.5993	325.917	82.279	313.062	84.6066
	332.422	76.925	327.624	78.594	326.084	82.2699	313.234	84.5988
	332.595	76.9202	327.786	78.5897	326.251	82.2613	313.405	84.5924
	332.769	76.9159	327.949	78.5854	326.416	82.2535	313.576	84.5872
	332.944	76.9124	328.111	78.5817	326.58	82.2455	313.746	84.5813
	333.119	76.9085	328.274	78.5779	326.742	82.2378	313.916	84.5755
	333.296	76.9043	328.437	78.574	326.903	82.2304	314.084	84.5675
	333.474	76.9001	328.601	78.5697	327.063	82.2225	314.25	84.5563
	333.653	76.8957	328.765	78.5656	327.224	82.2143	314.413	84.5445
	333.833	76.8909	328.93	78.5616	327.385	82.2061	314.574	84.5339
	334.014	76.8856	329.095	78.5579	327.548	82.1976	314.731	84.5231
	334.193	76.8811	329.259	78.5542	327.714	82.1898	314.886	84.5114
	334.371	76.8774	329.425	78.5509	327.881	82.1817	315.04	84.5009
	334.546	76.8731	329.591	78.5477	328.052	82.1736	315.194	84.491
	334.716	76.8696	329.761	78.5439	328.225	82.166	315.349	84.4806
	334.883	76.8661	329.936	78.5395	328.402	82.1585	315.507	84.4715
	335.046	76.8616	330.116	78.5348	328.58	82.1504	315.666	84.4668
	335.207	76.8568	330.3	78.5303	328.761	82.1428	315.827	84.4645
	335.368	76.8526	330.487	78.525	328.944	82.1348	315.987	84.4615
	335.531	76.8478	330.675	78.5192	329.131	82.1269	316.149	84.4588
	335.698	76.8434	330.863	78.5135	329.322	82.1192	316.312	84.4556
	335.871	76.8397	331.051	78.5084	329.517	82.1116	316.475	84.4509
	336.049	76.835	331.24	78.503	329.715	82.1038	316.64	84.445
	336.232	76.8297	331.427	78.498	329.915	82.0967	316.807	84.4394
	336.417	76.825	331.612	78.4936	330.115	82.089	316.975	84.4336
	336.604	76.8203	331.794	78.4898	330.31	82.081	317.143	84.4278
	336.791	76.8154	331.969	78.4861	330.499	82.0723	317.312	84.4222
	336.978	76.8113	332.138	78.4827	330.683	82.0638	317.481	84.4166
	337.166	76.8072	332.303	78.4782	330.863	82.0553	317.649	84.4108
	337.353	76.803	332.464	78.4734	331.039	82.047	317.816	84.4037
	337.539	76.7993	332.624	78.4686	331.212	82.0392	317.983	84.3963
	337.725	76.7958	332.785	78.4642	331.382	82.0314	318.149	84.3888
	337.909	76.7928	332.946	78.4602	331.546	82.0234	318.314	84.3804
	338.092	76.7897	333.109	78.4565	331.706	82.0146	318.48	84.3731
	338.273	76.7863	333.275	78.4528	331.861	82.0059	318.647	84.3677
	338.451	76.7824	333.442	78.4484	332.014	81.9965	318.814	84.3632
	338.626	76.7789	333.613	78.4429	332.166	81.9876	318.982	84.3579
	338.795	76.7757	333.786	78.4369	332.32	81.9792	319.148	84.3511
	338.96	76.773	333.962	78.4322	332.48	81.971	319.314	84.341
	339.121	76.7697	334.139	78.4275	332.644	81.9632	319.479	84.3273
	339.279	76.7671	334.318	78.4232	332.816	81.9556	319.643	84.3103
	339.436	76.7628	334.497	78.4189	332.993	81.9481	319.809	84.295
	339.592	76.7576	334.676	78.4144	333.173	81.9404	319.977	84.2835
	339.751	76.7526	334.854	78.4091	333.353	81.9331	320.147	84.2753
	339.912	76.7485	335.029	78.4039	333.53	81.9257	320.319	84.2698
	340.076	76.7441	335.204	78.3984	333.703	81.9185	320.491	84.2655
	340.246	76.7402	335.378	78.3916	333.871	81.9106	320.664	84.259
	340.42	76.7371	335.554	78.384	334.033	81.903	320.837	84.2505
	340.599	76.7334	335.733	78.3769	334.193	81.8949	321.009	84.242
	340.782	76.7289	335.914	78.3702	334.352	81.8866	321.179	84.2345
	340.967	76.7243	336.097	78.365	334.511	81.878	321.348	84.2287
	341.151	76.7198	336.279	78.3628	334.671	81.8697	321.513	84.2236
	341.335	76.7149	336.46	78.3622	334.833	81.8612	321.676	84.2181
	341.516	76.7094	336.637	78.3617	334.995	81.8525	321.837	84.2109
	341.695	76.7041	336.81	78.361	335.155	81.8444	321.996	84.2018
	341.872	76.6995	336.98	78.3593	335.314	81.8363	322.154	84.1933
	342.048	76.695	337.148	78.3556	335.471	81.8282	322.313	84.1856
	342.224	76.6904	337.312	78.3511	335.627	81.8203	322.472	84.1788
	342.401	76.6867	337.476	78.3466	335.783	81.8126	322.63	84.1731
	342.578	76.6827	337.64	78.341	335.94	81.8046	322.788	84.1692
	342.755	76.6779	337.803	78.3346	336.101	81.7965	322.946	84.1644
	342.932	76.6732	337.967	78.3288	336.264	81.7888	323.104	84.1598
	343.107	76.6692	338.133	78.3234	336.43	81.7812	323.263	84.1543
	343.28	76.6649	338.301	78.3185	336.598	81.7734	323.422	84.1479
	343.45	76.6609	338.469	78.314	336.77	81.7657	323.581	84.1398
	343.619	76.6567	338.636	78.3103	336.943	81.7582	323.74	84.1302
	343.785	76.6522	338.804	78.307	337.119	81.7503	323.899	84.1208
	343.947	76.6479	338.97	78.3033	337.298	81.7425	324.06	84.1129
	344.106	76.6433	339.137	78.2993	337.483	81.7343	324.223	84.1072
	344.262	76.6388	339.304	78.2951	337.672	81.7265	324.387	84.1022
	344.415	76.6347	339.475	78.2908	337.866	81.7191	324.552	84.0943
	344.567	76.6301	339.647	78.2862	338.062	81.7117	324.715	84.0824
	344.719	76.6253	339.822	78.2809	338.26	81.7037	324.877	84.0722
	344.871	76.6211	339.999	78.2753	338.457	81.6962	325.038	84.0645
	345.023	76.6167	340.177	78.2708	338.651	81.688	325.197	84.0592
	345.179	76.6124	340.356	78.2663	338.843	81.679	325.357	84.057
	345.338	76.6083	340.535	78.2615	339.032	81.6705	325.52	84.058
	345.501	76.6035	340.712	78.2566	339.214	81.6625	325.685	84.0562
	345.67	76.599	340.888	78.252	339.39	81.6537	325.852	84.0508
	345.846	76.5943	341.06	78.2466	339.561	81.645	326.02	84.042
	346.028	76.5895	341.228	78.2412	339.728	81.6368	326.188	84.0325
	346.215	76.5855	341.393	78.2357	339.892	81.6286	326.354	84.0217
	346.406	76.5821	341.554	78.2313	340.055	81.6202	326.519	84.0094
	346.597	76.5775	341.714	78.2267	340.219	81.6123	326.682	83.998
	346.788	76.573	341.877	78.2227	340.384	81.6041	326.843	83.9892
	346.977	76.5684	342.041	78.2182	340.552	81.5955	327.005	83.9826
	347.163	76.5634	342.207	78.2144	340.722	81.587	327.167	83.9776
	347.347	76.5581	342.375	78.2102	340.895	81.5783	327.33	83.9738
	347.529	76.5534	342.542	78.2056	341.071	81.5695	327.495	83.9686
	347.708	76.5487	342.708	78.2003	341.248	81.5616	327.66	83.9616
	347.885	76.5443	342.873	78.1953	341.427	81.5537	327.825	83.9533
	348.058	76.5399	343.038	78.1903	341.606	81.5461	327.991	83.9447
	348.227	76.5356	343.205	78.1842	341.786	81.5381	328.157	83.9366
	348.392	76.5314	343.373	78.178	341.966	81.5302	328.323	83.9294
	348.555	76.5271	343.544	78.1719	342.147	81.522	328.489	83.9231
	348.716	76.5233	343.719	78.1658	342.329	81.5137	328.655	83.9175
	348.876	76.5193	343.897	78.1595	342.511	81.5051	328.82	83.9129
	349.037	76.5145	344.077	78.1539	342.692	81.4965	328.985	83.9078
	349.196	76.5099	344.26	78.149	342.872	81.4881	329.152	83.9012
	349.356	76.5051	344.447	78.1439	343.048	81.4791	329.318	83.8931
	349.516	76.4999	344.635	78.1381	343.221	81.4706	329.484	83.8845
	349.676	76.4947	344.824	78.1329	343.392	81.4621	329.651	83.8741
	349.838	76.4903	345.012	78.1288	343.561	81.4537	329.816	83.8641
	350.003	76.4859	345.197	78.1241	343.73	81.4454	329.98	83.855
	350.172	76.4813	345.377	78.1193	343.898	81.4374	330.145	83.8459
	350.345	76.4764	345.554	78.1152	344.067	81.429	330.309	83.8371
	350.521	76.4718	345.728	78.1106	344.235	81.4205	330.475	83.8296
	350.7	76.4674	345.899	78.1052	344.402	81.4119	330.641	83.8226
	350.882	76.4629	346.069	78.0993	344.568	81.4029	330.808	83.814
	351.065	76.4583	346.237	78.0945	344.732	81.3939	330.976	83.8063
	351.25	76.4539	346.405	78.0897	344.896	81.3853	331.143	83.7997
	351.434	76.4496	346.572	78.0854	345.062	81.376	331.309	83.793
	351.618	76.4451	346.741	78.081	345.23	81.3677	331.475	83.7845
	351.801	76.4407	346.912	78.0768	345.401	81.3591	331.64	83.7761
	351.982	76.4364	347.086	78.0725	345.574	81.3506	331.807	83.7683
	352.159	76.4315	347.261	78.0683	345.751	81.3412	331.975	83.7614
	352.332	76.4271	347.436	78.063	345.93	81.3318	332.146	83.7565
	352.502	76.4229	347.612	78.0579	346.11	81.3219	332.317	83.7534
	352.669	76.4186	347.786	78.0534	346.29	81.3127	332.488	83.7512
	352.832	76.4142	347.962	78.049	346.471	81.304	332.659	83.747
	352.995	76.41	348.138	78.0447	346.652	81.2959	332.827	83.7396
	353.157	76.405	348.313	78.0415	346.833	81.2885	332.996	83.7297
	353.319	76.3995	348.488	78.0385	347.013	81.2812	333.165	83.7193
	353.482	76.3941	348.661	78.0347	347.195	81.2735	333.335	83.7105
	353.647	76.3893	348.831	78.0304	347.376	81.2655	333.505	83.7038
	353.817	76.385	348.996	78.0251	347.557	81.257	333.677	83.698
	353.993	76.381	349.157	78.0189	347.738	81.2484	333.849	83.692
	354.174	76.3766	349.315	78.0131	347.921	81.2392	334.018	83.686
	354.36	76.3723	349.47	78.0077	348.104	81.2305	334.186	83.6796
	354.551	76.3679	349.622	78.0021	348.288	81.2212	334.35	83.6724
	354.742	76.3629	349.772	77.9964	348.473	81.212	334.51	83.6643
	354.934	76.3578	349.921	77.9918	348.658	81.2025	334.666	83.6557
	355.125	76.3532	350.071	77.9875	348.84	81.1935	334.819	83.645
	355.314	76.3483	350.224	77.9827	349.021	81.1846	334.972	83.6339
	355.501	76.3431	350.383	77.9781	349.2	81.176	335.124	83.625
	355.687	76.3379	350.55	77.9736	349.376	81.1683	335.278	83.617
	355.87	76.3326	350.727	77.9685	349.552	81.161	335.434	83.6094
	356.051	76.3272	350.913	77.9629	349.727	81.1537	335.591	83.6019
	356.229	76.3222	351.107	77.9572	349.901	81.1458	335.749	83.5946
	356.405	76.3179	351.306	77.9519	350.073	81.1374	335.908	83.584
	356.579	76.3135	351.506	77.947	350.243	81.1286	336.068	83.5717
	356.753	76.3087	351.706	77.9416	350.409	81.1195	336.228	83.5598
	356.928	76.304	351.904	77.9361	350.572	81.1109	336.389	83.5498
	357.102	76.2993	352.098	77.9315	350.73	81.1013	336.55	83.5393
	357.276	76.2945	352.286	77.9263	350.884	81.0921	336.711	83.5311
	357.446	76.2902	352.469	77.9211	351.034	81.0821	336.873	83.5235
	357.613	76.2859	352.649	77.916	351.18	81.0729	337.036	83.5157
	357.776	76.2808	352.826	77.9112	351.324	81.0629	337.202	83.5083
	357.938	76.2755	353.002	77.906	351.469	81.0545	337.37	83.5009
	358.098	76.27	353.177	77.9004	351.618	81.0466	337.54	83.4943
	358.261	76.2641	353.352	77.8944	351.773	81.0387	337.711	83.4888
	358.426	76.2582	353.529	77.889	351.935	81.0308	337.882	83.4848
	358.594	76.2531	353.707	77.8833	352.105	81.0224	338.051	83.4812
	358.766	76.2478	353.885	77.8771	352.281	81.0121	338.219	83.4779
	358.942	76.2429	354.062	77.8718	352.458	81.0011	338.386	83.4724
	359.12	76.2382	354.234	77.8665	352.637	80.9896	338.552	83.4657
	359.299	76.2336	354.398	77.8607	352.813	80.9778	338.715	83.4576
	359.479	76.2285	354.553	77.8547	352.986	80.9671	338.877	83.4474
	359.657	76.2237	354.703	77.8488	353.154	80.9578	339.039	83.4371
	359.835	76.2186	354.852	77.8428	353.318	80.9492	339.202	83.4283
	360.013	76.2136	355.005	77.837	353.478	80.9412	339.365	83.4207
	360.191	76.2079	355.166	77.8319	353.636	80.933	339.529	83.414
	360.368	76.2027	355.337	77.8267	353.796	80.9242	339.696	83.4089
	360.546	76.197	355.512	77.8211	353.959	80.9159	339.864	83.4032
	360.725	76.1912	355.688	77.8162	354.128	80.9081	340.033	83.3964
	360.902	76.1857	355.862	77.8109	354.304	80.9007	340.202	83.3883
	361.076	76.1804	356.032	77.8049	354.484	80.8931	340.371	83.3779
	361.247	76.1754	356.197	77.7991	354.667	80.8852	340.539	83.365
	361.418	76.1705	356.36	77.7939	354.849	80.8771	340.708	83.3526
	361.589	76.1654	356.523	77.7887	355.026	80.8677	340.876	83.3416
	361.765	76.1602	356.685	77.7833	355.196	80.8577	341.045	83.3314
	361.947	76.1548	356.847	77.778	355.361	80.8486	341.212	83.3214
	362.136	76.1492	357.007	77.7728	355.522	80.8391	341.378	83.3124
	362.332	76.1437	357.169	77.7674	355.682	80.8291	341.543	83.3023
	362.528	76.138	357.332	77.7613	355.844	80.8191	341.707	83.2906
	362.723	76.1319	357.497	77.7557	356.007	80.81	341.87	83.2805
	362.914	76.1263	357.666	77.7507	356.173	80.7995	342.034	83.2751
	363.098	76.121	357.84	77.7448	356.341	80.7889	342.2	83.2722
	363.275	76.1152	358.018	77.7392	356.51	80.7795	342.37	83.2697
	363.447	76.1092	358.197	77.7343	356.679	80.7717	342.543	83.2669
	363.614	76.1032	358.377	77.7286	356.85	80.7633	342.719	83.261
	363.78	76.0978	358.555	77.722	357.023	80.7551	342.897	83.2513
	363.945	76.0922	358.73	77.7161	357.198	80.7474	343.073	83.2404
	364.108	76.0872	358.902	77.7102	357.375	80.7386	343.246	83.2318
	364.273	76.0812	359.071	77.7032	357.555	80.7283	343.414	83.2236
	364.437	76.0754	359.238	77.6966	357.736	80.7182	343.576	83.216
	364.601	76.0695	359.402	77.6902	357.919	80.7085	343.735	83.2091
	364.764	76.0626	359.563	77.6839	358.102	80.6993	343.89	83.2022
	364.928	76.0551	359.721	77.6773	358.284	80.6904	344.044	83.1944
	365.091	76.0492	359.878	77.6712	358.463	80.6809	344.198	83.1869
	365.255	76.0436	360.035	77.6649	358.639	80.671	344.353	83.1805
	365.418	76.0376	360.195	77.6594	358.813	80.6614	344.509	83.1742
	365.58	76.0314	360.359	77.6539	358.986	80.6514	344.668	83.1663
	365.742	76.0255	360.53	77.6482	359.159	80.6414	344.829	83.1566
	365.905	76.0194	360.705	77.6422	359.334	80.6317	344.992	83.1466
	366.069	76.0136	360.883	77.6365	359.51	80.6222	345.157	83.1377
	366.237	76.0084	361.061	77.631	359.688	80.6127	345.323	83.1287
	366.409	76.0033	361.236	77.6252	359.867	80.603	345.49	83.1188
	366.583	75.9982	361.406	77.6194	360.046	80.5935	345.658	83.109
	366.76	75.9933	361.571	77.6146	360.224	80.5842	345.826	83.0983
	366.94	75.9879	361.734	77.6095	360.401	80.575	345.995	83.0864
	367.12	75.9809	361.894	77.6035	360.577	80.565	346.163	83.075
	367.3	75.9745	362.053	77.5974	360.75	80.5557	346.329	83.0646
	367.48	75.9685	362.214	77.5914	360.922	80.5459	346.495	83.0549
	367.66	75.9622	362.375	77.5848	361.095	80.5367	346.659	83.0463
	367.837	75.9552	362.538	77.5785	361.27	80.5271	346.822	83.0358
	368.012	75.9492	362.704	77.5727	361.45	80.5183	346.987	83.0241
	368.185	75.9435	362.873	77.567	361.638	80.5088	347.152	83.014
	368.355	75.937	363.044	77.5613	361.834	80.4987	347.317	83.0054
	368.524	75.9306	363.22	77.5557	362.036	80.4874	347.482	82.9974
	368.694	75.9249	363.401	77.5492	362.241	80.4757	347.648	82.991
	368.865	75.9193	363.585	77.5426	362.444	80.4633	347.81	82.9855
	369.036	75.9136	363.771	77.5364	362.643	80.4511	347.97	82.981
	369.208	75.9075	363.954	77.5309	362.833	80.44	348.126	82.975
	369.379	75.9012	364.133	77.5248	363.014	80.4295	348.279	82.9671
	369.549	75.8951	364.307	77.5192	363.187	80.4201	348.43	82.959
	369.717	75.8888	364.476	77.5129	363.356	80.4113	348.582	82.9515
	369.883	75.8813	364.641	77.5059	363.52	80.4028	348.736	82.9417
	370.048	75.8747	364.805	77.4985	363.683	80.3934	348.893	82.9316
	370.213	75.868	364.969	77.4918	363.843	80.384	349.052	82.9241
	370.378	75.8611	365.133	77.4844	364.004	80.3738	349.214	82.918
	370.543	75.8541	365.298	77.4781	364.166	80.3639	349.378	82.9117
	370.711	75.8481	365.464	77.4723	364.328	80.3536	349.544	82.9056
	370.88	75.842	365.634	77.4663	364.492	80.3433	349.711	82.9
	371.05	75.8356	365.808	77.4603	364.655	80.3331	349.879	82.8917
	371.219	75.8282	365.985	77.4541	364.818	80.3232	350.047	82.8816
	371.389	75.8214	366.163	77.4475	364.981	80.3131	350.215	82.8712
	371.558	75.8142	366.342	77.4402	365.144	80.3035	350.382	82.8609
	371.728	75.8067	366.521	77.4329	365.309	80.2954	350.547	82.8508
	371.898	75.7994	366.699	77.4252	365.478	80.2878	350.712	82.8419
	372.07	75.7929	366.878	77.4186	365.65	80.28	350.875	82.8331
	372.244	75.786	367.058	77.4123	365.824	80.2717	351.037	82.8239
	372.419	75.7793	367.24	77.4056	366.001	80.263	351.199	82.8129
	372.596	75.7725	367.424	77.3995	366.176	80.2527	351.361	82.7994
	372.772	75.7664	367.609	77.3933	366.351	80.2413	351.523	82.7855
	372.947	75.7601	367.792	77.3868	366.524	80.2297	351.687	82.7724
	373.123	75.7532	367.974	77.3803	366.695	80.2182	351.853	82.7595
	373.3	75.7463	368.153	77.3741	366.864	80.2068	352.021	82.7495
	373.477	75.7391	368.327	77.3668	367.032	80.196	352.19	82.7423
	373.656	75.731	368.493	77.3601	367.198	80.1855	352.358	82.7352
	373.836	75.7227	368.651	77.3525	367.362	80.1751	352.523	82.7257
	374.016	75.7152	368.803	77.3449	367.526	80.1647	352.684	82.7139
	374.196	75.7079	368.95	77.3376	367.69	80.1539	352.841	82.7026
	374.376	75.7005	369.094	77.3302	367.854	80.1431	352.996	82.6929
	374.555	75.6935	369.237	77.3229	368.017	80.1325	353.15	82.6842
	374.733	75.6864	369.384	77.3168	368.182	80.1218	353.305	82.6767
	374.911	75.6786	369.535	77.3106	368.347	80.1105	353.459	82.6707
	375.088	75.671	369.691	77.3035	368.514	80.0996	353.614	82.6637
	375.262	75.6636	369.855	77.2965	368.682	80.0884	353.769	82.6544
	375.436	75.6563	370.026	77.2894	368.852	80.0772	353.924	82.6448
	375.609	75.6489	370.204	77.2825	369.024	80.0658	354.081	82.6355
	375.781	75.6416	370.388	77.2757	369.197	80.0542	354.24	82.6284
	375.953	75.6339	370.575	77.2691	369.371	80.0418	354.402	82.6225
	376.127	75.6265	370.762	77.2626	369.543	80.0293	354.567	82.6173
	376.301	75.6186	370.948	77.2563	369.711	80.0169	354.734	82.6115
	376.475	75.611	371.132	77.249	369.877	80.0049	354.902	82.6053
	376.649	75.6037	371.313	77.2416	370.041	79.9937	355.07	82.5979
	376.822	75.5961	371.493	77.2341	370.204	79.9829	355.24	82.5891
	376.993	75.5882	371.671	77.2266	370.369	79.9718	355.41	82.5789
	377.161	75.5805	371.849	77.2182	370.536	79.9603	355.58	82.5684
	377.326	75.5727	372.024	77.2096	370.706	79.9483	355.75	82.557
	377.489	75.5648	372.198	77.2017	370.879	79.9368	355.921	82.5444
	377.651	75.5572	372.371	77.1946	371.053	79.9253	356.09	82.5314
	377.814	75.549	372.544	77.1875	371.227	79.9141	356.26	82.519
	377.977	75.5401	372.717	77.1806	371.399	79.9034	356.432	82.5065
	378.142	75.531	372.891	77.1739	371.57	79.8925	356.605	82.496
	378.309	75.5219	373.067	77.1665	371.739	79.8811	356.777	82.4855
	378.478	75.5129	373.246	77.1583	371.909	79.8699	356.95	82.4743
	378.649	75.5042	373.428	77.1501	372.081	79.8589	357.12	82.4617
	378.823	75.4961	373.613	77.1423	372.254	79.8478	357.288	82.4497
	378.999	75.488	373.799	77.135	372.43	79.8366	357.454	82.438
	379.177	75.4798	373.982	77.1271	372.607	79.8252	357.62	82.427
	379.354	75.4712	374.162	77.12	372.784	79.8127	357.785	82.4137
	379.53	75.4627	374.335	77.1126	372.963	79.7994	357.949	82.3993
	379.702	75.4541	374.502	77.1046	373.142	79.7862	358.111	82.3854
	379.872	75.4458	374.663	77.0957	373.322	79.7725	358.274	82.3725
	380.038	75.4372	374.822	77.087	373.5	79.7587	358.434	82.3612
	380.203	75.4281	374.979	77.0777	373.675	79.7461	358.595	82.3552
	380.368	75.4186	375.137	77.0692	373.847	79.7337	358.757	82.3509
	380.533	75.409	375.297	77.0618	374.015	79.7207	358.919	82.3462
	380.698	75.3991	375.458	77.0552	374.18	79.7079	359.082	82.3402
	380.864	75.3893	375.621	77.0487	374.343	79.6945	359.247	82.3324
	381.028	75.3802	375.786	77.0426	374.506	79.6804	359.412	82.3234
	381.19	75.3716	375.955	77.0359	374.669	79.6665	359.578	82.3156
	381.35	75.3625	376.126	77.0278	374.834	79.653	359.744	82.3073
	381.509	75.3537	376.3	77.0195	375.002	79.6402	359.909	82.299
	381.668	75.3443	376.478	77.0115	375.172	79.6287	360.071	82.2918
	381.829	75.335	376.66	77.0032	375.345	79.6175	360.231	82.284
	381.991	75.3251	376.846	76.9946	375.522	79.6056	360.389	82.2746
	382.155	75.3156	377.036	76.9865	375.7	79.5927	360.545	82.2656
	382.322	75.3059	377.227	76.9776	375.881	79.5799	360.703	82.2559
	382.492	75.2963	377.418	76.9681	376.064	79.5659	360.862	82.2453
	382.664	75.2861	377.607	76.9577	376.246	79.5516	361.022	82.2328
	382.839	75.2757	377.791	76.9483	376.426	79.5379	361.185	82.2199
	383.015	75.265	377.968	76.939	376.601	79.5244	361.35	82.2061
	383.193	75.2544	378.137	76.93	376.77	79.5112	361.518	82.1944
	383.37	75.2439	378.299	76.9218	376.932	79.4984	361.687	82.1837
	383.546	75.2334	378.453	76.9137	377.091	79.4856	361.856	82.1734
	383.72	75.2228	378.601	76.9053	377.25	79.4727	362.025	82.1631
	383.894	75.2125	378.749	76.8961	377.41	79.4601	362.192	82.1523
	384.068	75.2021	378.899	76.8877	377.572	79.447	362.356	82.1376
	384.243	75.1917	379.051	76.8783	377.737	79.4343	362.517	82.1216
	384.418	75.1814	379.206	76.8695	377.904	79.4222	362.677	82.1067
	384.594	75.1706	379.366	76.8602	378.07	79.4107	362.837	82.0946
	384.771	75.1599	379.528	76.851	378.238	79.3991	362.998	82.0852
	384.946	75.149	379.692	76.8411	378.407	79.3878	363.162	82.0786
	385.12	75.1381	379.86	76.8319	378.578	79.3756	363.329	82.0708
	385.293	75.127	380.034	76.8224	378.749	79.3623	363.497	82.0619
	385.464	75.1164	380.212	76.8125	378.921	79.3483	363.665	82.0512
	385.635	75.1055	380.393	76.8027	379.094	79.3341	363.831	82.0391
	385.805	75.0948	380.577	76.7929	379.267	79.3195	363.994	82.0263
	385.975	75.0842	380.763	76.7828	379.439	79.3048	364.154	82.0164
	386.148	75.0736	380.947	76.7731	379.613	79.2899	364.31	82.0079
	386.324	75.0627	381.13	76.7633	379.787	79.2749	364.466	81.9994
	386.501	75.0514	381.312	76.7537	379.962	79.2601	364.622	81.9911
	386.68	75.0395	381.492	76.7437	380.14	79.2452	364.78	81.9826
	386.86	75.0275	381.67	76.7341	380.32	79.2308	364.942	81.9722
	387.039	75.0155	381.847	76.7246	380.5	79.2178	365.104	81.9623
	387.215	75.0036	382.024	76.7155	380.677	79.2048	365.266	81.9537
	387.39	74.9919	382.2	76.7058	380.851	79.1912	365.429	81.9452
	387.562	74.9804	382.376	76.6961	381.02	79.1768	365.59	81.9374
	387.734	74.9683	382.55	76.686	381.184	79.1617	365.752	81.9294
	387.904	74.9564	382.724	76.6757	381.345	79.1458	365.914	81.9188
	388.074	74.9446	382.897	76.6656	381.504	79.1294	366.08	81.9068
	388.246	74.9327	383.066	76.6557	381.663	79.113	366.249	81.895
	388.417	74.9208	383.232	76.6462	381.822	79.0976	366.419	81.8824
	388.589	74.9089	383.396	76.6363	381.983	79.0825	366.589	81.8703
	388.763	74.8966	383.557	76.6261	382.148	79.0672	366.757	81.859
	388.937	74.884	383.718	76.6155	382.318	79.0518	366.92	81.8474
[truncated: 3,087 more rows]

## Sheet: Thermal properties (DSC)
	Temperature	Heat flow endo up	Temperature	Heat flow endo up	Temperature	Heat flow endo up	Temperature	Heat flow endo up
	℃	mW	℃	mW	℃	mW	℃	mW
	x-PDB-0-F5-SEBS	x-PDB-0-F5-SEBS	x-PDB-4-F5-SEBS	x-PDB-4-F5-SEBS	x-PDB-8-F5-SEBS	x-PDB-8-F5-SEBS	x-PDB-12-F5-SEBS	x-PDB-12-F5-SEBS
	-40.2532	17.1083	-40.255	15.2686	-40.2533	9.61427	-0.24778	13.8876
	-40.4647	17.1084	-40.4683	15.2686	-40.4648	9.61433	-0.4544	13.8877
	-40.6362	17.1084	-40.6412	15.2686	-40.6364	9.61435	-0.62175	13.8877
	-40.7723	17.1083	-40.7785	15.2685	-40.7726	9.61419	-0.75427	13.8877
	-40.8772	17.1082	-40.8844	15.2683	-40.8777	9.61417	-0.85616	13.8877
	-40.9549	17.1082	-40.9629	15.2683	-40.9558	9.61427	-0.93133	13.8878
	-41.0091	17.1083	-41.0178	15.2685	-41.0105	9.61445	-0.98345	13.888
	-41.0433	17.1084	-41.0526	15.2688	-41.0453	9.61471	-1.01591	13.8881
	-41.0608	17.1084	-41.0704	15.269	-41.0635	9.61519	-1.03183	13.8881
	-41.0642	17.109	-41.0743	15.2691	-41.0677	9.61558	-1.03407	13.8879
	-41.0564	17.1086	-41.0667	15.27	-41.0608	9.61489	-1.02523	13.8886
	-41.0395	17.1074	-41.05	15.2676	-41.0448	9.61248	-1.00764	13.8869
	-41.0157	17.1031	-41.0264	15.2622	-41.022	9.60599	-0.98336	13.8816
	-40.9868	17.0904	-40.9976	15.2515	-40.994	9.58469	-0.95418	13.8711
	-40.9541	17.0648	-40.9651	15.2368	-40.9623	9.5554	-0.92165	13.858
	-40.9191	17.0353	-40.9302	15.2241	-40.928	9.52533	-0.88701	13.8459
	-40.8825	16.9984	-40.8937	15.2119	-40.8922	9.49496	-0.85128	13.8343
	-40.8451	16.9558	-40.8564	15.1988	-40.8552	9.47274	-0.81519	13.8218
	-40.8072	16.9096	-40.8186	15.1889	-40.8175	9.45599	-0.77921	13.8128
	-40.4454	16.8629	-40.4583	15.1805	-40.4571	9.44671	-0.40887	13.8047
	-40.2644	16.8147	-40.2781	15.1741	-40.2769	9.43837	-0.22876	13.7985
	-40.0835	16.7666	-40.0881	15.1696	-40.0869	9.44051	-0.04866	13.7935
	-39.8926	16.72	-39.908	15.1673	-39.907	9.44573	0.13143	13.7889
	-39.7116	16.6719	-39.728	15.1653	-39.7272	9.45349	0.31148	13.7865
	-39.5207	16.6238	-39.548	15.1647	-39.5374	9.46304	0.49153	13.7838
	-39.3498	16.5777	-39.358	15.1661	-39.3576	9.47662	0.67157	13.7818
	-39.169	16.5333	-39.178	15.1677	-39.178	9.49289	0.8516	13.7803
	-38.9881	16.4914	-38.9981	15.1696	-38.9983	9.51065	1.02162	13.779
	-38.8074	16.4518	-38.8181	15.1724	-38.8186	9.52808	1.20165	13.7778
	-38.6267	16.415	-38.6482	15.1758	-38.649	9.54696	1.37166	13.7769
	-38.446	16.3784	-38.4682	15.1791	-38.4694	9.56605	1.54168	13.776
	-38.2753	16.3445	-38.2883	15.1825	-38.2997	9.58477	1.72169	13.7755
	-38.1047	16.3134	-38.1184	15.1857	-38.1201	9.60278	1.8817	13.7751
	-37.9341	16.2844	-37.9484	15.189	-37.9504	9.62075	2.0517	13.7752
	-37.7636	16.2563	-37.7785	15.1919	-37.7808	9.63953	2.2217	13.7752
	-37.5931	16.2304	-37.6086	15.1948	-37.6112	9.65863	2.3917	13.7753
	-37.4326	16.208	-37.4486	15.1977	-37.4515	9.67712	2.5517	13.7752
	-37.2622	16.1867	-37.2787	15.2007	-37.2819	9.69546	2.7117	13.7751
	-37.0919	16.1676	-37.1087	15.2036	-37.1122	9.71009	2.8817	13.775
	-36.9315	16.1501	-36.9488	15.2066	-36.9524	9.72463	3.0517	13.7749
	-36.7712	16.1345	-36.7888	15.2096	-36.7827	9.73817	3.2117	13.7749
	-36.6009	16.1207	-36.6189	15.212	-36.623	9.75083	3.38171	13.7748
	-36.4407	16.1073	-36.4489	15.214	-36.4532	9.76347	3.54171	13.7747
	-36.2704	16.0946	-36.289	15.2161	-36.2934	9.77517	3.71171	13.7747
	-36.1102	16.0832	-36.119	15.2181	-36.1236	9.78555	3.87171	13.7746
	-35.94	16.0719	-35.959	15.2198	-35.9638	9.79463	4.04171	13.7746
	-35.7698	16.0618	-35.7891	15.2212	-35.794	9.80224	4.21171	13.7745
	-35.6096	16.0534	-35.6291	15.2224	-35.6341	9.80894	4.38171	13.7745
	-35.4395	16.0452	-35.4591	15.2235	-35.4642	9.81544	4.54171	13.7745
	-35.2793	16.0378	-35.2991	15.2248	-35.3043	9.82194	4.70171	13.7744
	-35.1092	16.0306	-35.1292	15.226	-35.1345	9.82816	4.87171	13.7744
	-34.9491	16.0238	-34.9592	15.2272	-34.9746	9.83474	5.04172	13.7743
	-34.7789	16.0173	-34.7992	15.2284	-34.8047	9.83867	5.20172	13.7741
	-34.6088	16.0107	-34.6292	15.2294	-34.6347	9.84177	5.37172	13.774
	-34.4487	16.0043	-34.4692	15.2303	-34.4748	9.84568	5.54172	13.7739
	-34.2786	15.9988	-34.2993	15.2312	-34.3049	9.84967	5.70172	13.7738
	-34.1185	15.9946	-34.1393	15.2322	-34.1449	9.853	5.87173	13.7737
	-33.9484	15.9904	-33.9693	15.2329	-33.975	9.85614	6.04173	13.7737
	-33.7784	15.9867	-33.7993	15.2335	-33.8051	9.85916	6.20173	13.7736
	-33.6183	15.9832	-33.6393	15.234	-33.6451	9.86249	6.37173	13.7735
	-33.4482	15.9797	-33.4693	15.2345	-33.4752	9.86556	6.54173	13.7735
	-33.2781	15.9762	-33.2993	15.2351	-33.3052	9.86848	6.70173	13.7733
	-33.1081	15.9728	-33.1393	15.2356	-33.1453	9.87132	6.87174	13.7733
	-32.948	15.9694	-32.9693	15.2361	-32.9753	9.87374	7.04174	13.7732
	-32.7779	15.9659	-32.7994	15.2366	-32.8054	9.87596	7.20174	13.7732
	-32.6179	15.962	-32.6394	15.2371	-32.6454	9.87801	7.37174	13.7731
	-32.4478	15.9595	-32.4694	15.2377	-32.4755	9.88004	7.54174	13.773
	-32.2778	15.9576	-32.2994	15.2381	-32.3055	9.88216	7.70174	13.7729
	-32.1177	15.9556	-32.1394	15.2386	-32.1455	9.88433	7.87174	13.7728
	-31.9477	15.9535	-31.9694	15.239	-31.9756	9.88606	8.04175	13.7727
	-31.7777	15.9516	-31.7994	15.2393	-31.8056	9.88763	8.20175	13.7727
	-31.6176	15.9499	-31.6394	15.2397	-31.6456	9.88897	8.37175	13.7727
	-31.4476	15.9482	-31.4694	15.2401	-31.4657	9.89038	8.54175	13.7726
	-31.2776	15.9466	-31.2994	15.2403	-31.3057	9.89186	8.71175	13.7725
	-31.1075	15.9451	-31.1394	15.2406	-31.1357	9.89327	8.87175	13.7724
	-30.9475	15.9436	-30.9694	15.2409	-30.9758	9.89458	9.04175	13.7723
	-30.7775	15.9421	-30.7995	15.2411	-30.8058	9.89584	9.20176	13.7722
	-30.6075	15.9407	-30.6295	15.2414	-30.6458	9.89698	9.37176	13.7721
	-30.4474	15.9393	-30.4695	15.2416	-30.4758	9.89808	9.54176	13.772
	-30.2774	15.9381	-30.2995	15.2418	-30.3058	9.89919	9.70176	13.7719
	-30.1074	15.9368	-30.1295	15.242	-30.1359	9.90027	9.87176	13.7719
	-29.9474	15.9356	-29.9695	15.2421	-29.9759	9.90131	10.0418	13.7718
	-29.7773	15.9344	-29.7995	15.2422	-29.8059	9.90233	10.2118	13.7717
	-29.6073	15.9333	-29.6295	15.2423	-29.6359	9.90323	10.3718	13.7717
	-29.4473	15.9322	-29.4695	15.2424	-29.4759	9.90409	10.5418	13.7716
	-29.2773	15.9313	-29.2995	15.2424	-29.3059	9.90493	10.7018	13.7715
	-29.1073	15.9303	-29.1295	15.2424	-29.136	9.90581	10.8718	13.7714
	-28.9472	15.9294	-28.9695	15.2423	-28.976	9.90667	11.0418	13.7713
	-28.7772	15.9285	-28.7995	15.2423	-28.806	9.90745	11.2018	13.7713
	-28.6072	15.9277	-28.6295	15.2423	-28.636	9.90819	11.3718	13.7713
	-28.4472	15.927	-28.4695	15.2422	-28.466	9.90893	11.5418	13.7712
	-28.2772	15.9264	-28.2995	15.2421	-28.306	9.90962	11.7118	13.7712
	-28.1072	15.9258	-28.1295	15.2419	-28.1361	9.9102	11.8718	13.7711
	-27.9472	15.9252	-27.9695	15.2418	-27.9661	9.91073	12.0418	13.7711
	-27.7771	15.9246	-27.7995	15.2416	-27.8061	9.91122	12.2118	13.771
	-27.6071	15.924	-27.6295	15.2414	-27.6361	9.91164	12.3718	13.771
	-27.4471	15.9233	-27.4694	15.2412	-27.4761	9.91203	12.5418	13.7709
	-27.2771	15.9227	-27.2995	15.241	-27.3061	9.91242	12.7018	13.7709
	-27.1071	15.9222	-27.1294	15.2408	-27.1361	9.91277	12.8818	13.7709
	-26.9471	15.9216	-26.9594	15.2406	-26.9761	9.91308	13.0418	13.7709
	-26.7771	15.9211	-26.7994	15.2404	-26.8061	9.91331	13.2018	13.7708
	-26.6071	15.9206	-26.6294	15.2402	-26.6361	9.91348	13.3718	13.7708
	-26.437	15.9201	-26.4594	15.2399	-26.4761	9.9137	13.5418	13.7707
	-26.277	15.9196	-26.2994	15.2397	-26.3061	9.91391	13.7018	13.7707
	-26.107	15.9192	-26.1294	15.2395	-26.1361	9.91414	13.8718	13.7707
	-25.937	15.9188	-25.9594	15.2393	-25.9761	9.91429	14.0418	13.7707
	-25.777	15.9185	-25.7994	15.2391	-25.8061	9.91443	14.2118	13.7706
	-25.607	15.9183	-25.6294	15.2389	-25.6361	9.91456	14.3718	13.7706
	-25.447	15.918	-25.4594	15.2387	-25.4661	9.91471	14.5418	13.7706
	-25.277	15.9178	-25.2994	15.2384	-25.3061	9.91487	14.7118	13.7706
	-25.107	15.9176	-25.1294	15.2382	-25.1361	9.91498	14.8718	13.7705
	-24.937	15.9173	-24.9594	15.2379	-24.9661	9.91508	15.0418	13.7705
	-24.777	15.917	-24.7994	15.2376	-24.8061	9.91521	15.2118	13.7705
	-24.607	15.9167	-24.6294	15.2374	-24.6362	9.91536	15.3718	13.7706
	-24.437	15.9164	-24.4594	15.2371	-24.4661	9.91554	15.5418	13.7706
	-24.277	15.9161	-24.2994	15.2367	-24.3062	9.91571	15.7118	13.7706
	-24.107	15.916	-24.1294	15.2364	-24.1362	9.9159	15.8718	13.7706
	-23.947	15.9158	-23.9594	15.2361	-23.9662	9.91613	16.0418	13.7707
	-23.777	15.9157	-23.7994	15.2357	-23.8062	9.91638	16.2118	13.7707
	-23.607	15.9155	-23.6293	15.2355	-23.6362	9.91659	16.3718	13.7706
	-23.437	15.9153	-23.4693	15.2352	-23.4662	9.91681	16.5418	13.7705
	-23.2769	15.9151	-23.2993	15.2348	-23.3062	9.91708	16.7118	13.7705
	-23.107	15.9149	-23.1293	15.2345	-23.1362	9.91731	16.8818	13.7704
	-22.9369	15.9147	-22.9593	15.2341	-22.9662	9.9175	17.0418	13.7703
	-22.7769	15.9145	-22.7993	15.2338	-22.7962	9.91765	17.2118	13.7702
	-22.6069	15.9142	-22.6293	15.2336	-22.6362	9.9178	17.3818	13.7702
	-22.4369	15.9139	-22.4593	15.2334	-22.4762	9.91796	17.5418	13.7702
	-22.2769	15.9136	-22.2993	15.2331	-22.3062	9.91811	17.7118	13.7701
	-22.1069	15.9132	-22.1293	15.2328	-22.1362	9.91826	17.8718	13.77
	-21.9369	15.9129	-21.9593	15.2325	-21.9662	9.91834	18.0418	13.77
	-21.7769	15.9125	-21.7993	15.2321	-21.8062	9.91843	18.2118	13.77
	-21.6069	15.9122	-21.6293	15.2317	-21.6362	9.91854	18.3718	13.77
	-21.4369	15.9118	-21.4693	15.2314	-21.4662	9.91866	18.5418	13.77
	-21.2769	15.9116	-21.2993	15.2311	-21.3062	9.91873	18.7118	13.7699
	-21.1069	15.9113	-21.1292	15.2307	-21.1362	9.91883	18.8718	13.7699
	-20.9369	15.9111	-20.9692	15.2303	-20.9762	9.91892	19.0418	13.7699
	-20.7769	15.9109	-20.7992	15.23	-20.8062	9.91906	19.2118	13.7698
	-20.6069	15.9108	-20.6292	15.2296	-20.6362	9.91917	19.3818	13.7697
	-20.4369	15.9107	-20.4592	15.2292	-20.4762	9.91924	19.5418	13.7697
	-20.2669	15.9105	-20.2992	15.2288	-20.3062	9.91932	19.7118	13.7696
	-20.1069	15.9104	-20.1292	15.2285	-20.1362	9.91937	19.8718	13.7696
	-19.9369	15.9103	-19.9592	15.2281	-19.9662	9.91941	20.0418	13.7696
	-19.7769	15.9102	-19.7992	15.2278	-19.8062	9.91944	20.2118	13.7696
	-19.6069	15.9102	-19.6292	15.2274	-19.6362	9.91952	20.3718	13.7697
	-19.4369	15.9101	-19.4592	15.227	-19.4662	9.91957	20.5418	13.7697
	-19.2769	15.91	-19.2992	15.2265	-19.3062	9.91967	20.7118	13.7698
	-19.1069	15.9099	-19.1292	15.226	-19.1362	9.9198	20.8818	13.7698
	-18.9368	15.9098	-18.9691	15.2256	-18.9662	9.91988	21.0418	13.7698
	-18.7768	15.9096	-18.7991	15.2252	-18.8062	9.91989	21.2118	13.7699
	-18.6069	15.9095	-18.6291	15.2247	-18.6362	9.91995	21.3718	13.77
	-18.4368	15.9094	-18.4591	15.2242	-18.4662	9.92002	21.5418	13.77
	-18.2768	15.9093	-18.2991	15.2237	-18.3062	9.9201	21.7118	13.77
	-18.1068	15.9092	-18.1291	15.2232	-18.1362	9.92013	21.8718	13.77
	-17.9368	15.909	-17.9591	15.2227	-17.9662	9.92023	22.0418	13.77
	-17.7768	15.9088	-17.7991	15.2222	-17.8062	9.92034	22.2118	13.77
	-17.6068	15.9086	-17.6291	15.2217	-17.6363	9.92042	22.3718	13.77
	-17.4368	15.9084	-17.4591	15.2212	-17.4662	9.92047	22.5418	13.77
	-17.2768	15.9082	-17.2991	15.2206	-17.3062	9.92053	22.7118	13.7701
	-17.1068	15.9079	-17.129	15.2201	-17.1363	9.92062	22.8718	13.7702
	-16.9368	15.9078	-16.959	15.2196	-16.9662	9.92074	23.0418	13.7703
	-16.7768	15.9076	-16.799	15.2192	-16.8063	9.92089	23.2118	13.7703
	-16.6068	15.9073	-16.629	15.2188	-16.6363	9.92102	23.3718	13.7704
	-16.4368	15.907	-16.459	15.2184	-16.4663	9.92117	23.5418	13.7705
	-16.2768	15.9067	-16.299	15.2179	-16.3063	9.92129	23.7118	13.7706
	-16.1068	15.9065	-16.129	15.2175	-16.1363	9.9215	23.8718	13.7706
	-15.9368	15.9063	-15.959	15.2171	-15.9663	9.92167	24.0418	13.7706
	-15.7768	15.9061	-15.799	15.2167	-15.8063	9.92178	24.2118	13.7706
	-15.6068	15.9059	-15.629	15.2162	-15.6363	9.92189	24.3718	13.7706
	-15.4368	15.9057	-15.459	15.2158	-15.4663	9.92207	24.5418	13.7707
	-15.2768	15.9056	-15.2989	15.2153	-15.3063	9.92222	24.7118	13.7707
	-15.1068	15.9054	-15.1289	15.2148	-15.1363	9.92235	24.8718	13.7707
	-14.9368	15.9052	-14.9589	15.2143	-14.9663	9.9225	25.0418	13.7707
	-14.7768	15.905	-14.7989	15.2138	-14.8063	9.92266	25.2118	13.7708
	-14.6067	15.9048	-14.6289	15.2133	-14.6363	9.92283	25.3718	13.7709
	-14.4367	15.9046	-14.4589	15.2129	-14.4663	9.92294	25.5418	13.771
	-14.2767	15.9044	-14.2989	15.2125	-14.2963	9.92307	25.7118	13.7711
	-14.1067	15.9041	-14.1289	15.2121	-14.1363	9.92319	25.8718	13.7712
	-13.9367	15.9039	-13.9589	15.2118	-13.9663	9.92326	26.0418	13.7714
	-13.7767	15.9036	-13.7889	15.2115	-13.8063	9.92332	26.2118	13.7715
	-13.6067	15.9033	-13.6289	15.2112	-13.6363	9.92333	26.3718	13.7716
	-13.4367	15.9031	-13.4589	15.2108	-13.4663	9.92337	26.5418	13.7717
	-13.2767	15.9028	-13.2989	15.2105	-13.3063	9.92344	26.7118	13.7718
	-13.1067	15.9026	-13.1288	15.2101	-13.1363	9.92352	26.8718	13.7719
	-12.9367	15.9024	-12.9688	15.2097	-12.9763	9.92357	27.0418	13.7719
	-12.7767	15.9022	-12.7988	15.2093	-12.8063	9.92359	27.2118	13.772
	-12.6067	15.9019	-12.6288	15.2088	-12.6363	9.92365	27.3718	13.772
	-12.4367	15.9017	-12.4588	15.2084	-12.4663	9.92376	27.5418	13.7721
	-12.2667	15.9014	-12.2988	15.208	-12.3063	9.92389	27.7118	13.7722
	-12.1067	15.9012	-12.1288	15.2076	-12.1363	9.92399	27.8818	13.7723
	-11.9367	15.9009	-11.9588	15.2072	-11.9663	9.9241	28.0418	13.7723
	-11.7667	15.9006	-11.7988	15.2066	-11.8063	9.92423	28.2117	13.7724
	-11.6067	15.9003	-11.6288	15.2061	-11.6363	9.92436	28.3717	13.7725
	-11.4367	15.9	-11.4588	15.2056	-11.4663	9.92448	28.5418	13.7725
	-11.2767	15.8997	-11.2988	15.2051	-11.3063	9.92463	28.7117	13.7725
	-11.1067	15.8994	-11.1287	15.2046	-11.1363	9.92482	28.8818	13.7725
	-10.9366	15.899	-10.9587	15.2041	-10.9663	9.92499	29.0418	13.7725
	-10.7766	15.8987	-10.7987	15.2037	-10.8063	9.92514	29.2117	13.7725
	-10.6066	15.8984	-10.6287	15.2033	-10.6363	9.92528	29.3717	13.7724
	-10.4366	15.898	-10.4587	15.2028	-10.4663	9.92547	29.5418	13.7724
	-10.2766	15.8977	-10.2987	15.2024	-10.3064	9.92566	29.7117	13.7723
	-10.1066	15.8973	-10.1287	15.202	-10.1364	9.92585	29.8717	13.7723
	-9.9366	15.8969	-9.95868	15.2016	-9.96636	9.92604	30.0418	13.7723
	-9.77659	15.8965	-9.79868	15.2013	-9.80636	9.92619	30.2117	13.7723
	-9.60659	15.8961	-9.62867	15.201	-9.63636	9.92632	30.3717	13.7723
	-9.43658	15.8957	-9.45866	15.2007	-9.46636	9.92647	30.5418	13.7723
	-9.27657	15.8953	-9.29866	15.2004	-9.30637	9.92662	30.7118	13.7722
	-9.10656	15.8949	-9.12865	15.2001	-9.13637	9.92676	30.8818	13.7722
	-8.93655	15.8944	-8.95865	15.1998	-8.96637	9.92689	31.0418	13.7723
	-8.77654	15.8939	-8.79864	15.1995	-8.80637	9.92704	31.2117	13.7723
	-8.60653	15.8935	-8.62864	15.1992	-8.63638	9.92717	31.3717	13.7723
	-8.43653	15.8931	-8.45863	15.199	-8.46638	9.92727	31.5418	13.7723
	-8.27652	15.8926	-8.29863	15.1988	-8.30638	9.9274	31.7117	13.7724
	-8.10651	15.8922	-8.12862	15.1985	-8.13638	9.92751	31.8818	13.7724
	-7.9365	15.8918	-7.95862	15.1983	-7.96639	9.92763	32.0418	13.7725
	-7.76649	15.8913	-7.79861	15.198	-7.80639	9.92772	32.2118	13.7725
	-7.60648	15.8909	-7.62861	15.1977	-7.63639	9.92783	32.3717	13.7725
	-7.43648	15.8905	-7.4586	15.1974	-7.46639	9.928	32.5418	13.7725
	-7.26647	15.8901	-7.29859	15.1971	-7.3064	9.92816	32.7118	13.7725
	-7.10646	15.8898	-7.12859	15.1968	-7.1364	9.92827	32.8817	13.7726
	-6.93645	15.8894	-6.95858	15.1965	-6.9664	9.92842	33.0418	13.7726
	-6.77645	15.8889	-6.79858	15.1962	-6.8064	9.92861	33.2118	13.7727
	-6.60644	15.8885	-6.62857	15.1959	-6.63641	9.92878	33.3717	13.7728
	-6.43643	15.888	-6.45857	15.1956	-6.46641	9.92899	33.5417	13.7729
	-6.26642	15.8876	-6.29856	15.1953	-6.30642	9.92922	33.7117	13.773
	-6.10641	15.8871	-6.12855	15.195	-6.13642	9.92943	33.8817	13.773
	-5.9364	15.8866	-5.95855	15.1947	-5.96643	9.92961	34.0417	13.7731
	-5.77639	15.8861	-5.78854	15.1944	-5.79643	9.92978	34.2117	13.7732
	-5.60638	15.8856	-5.62854	15.1941	-5.63643	9.92994	34.3817	13.7732
	-5.43637	15.8851	-5.45853	15.1938	-5.46643	9.93009	34.5417	13.7732
	-5.26636	15.8846	-5.28852	15.1934	-5.30644	9.93022	34.7117	13.7732
	-5.10636	15.8843	-5.12852	15.193	-5.13644	9.93035	34.8717	13.7732
	-4.93635	15.884	-4.95851	15.1927	-4.96644	9.93048	35.0417	13.7732
	-4.77634	15.8836	-4.7885	15.1923	-4.79644	9.93056	35.2117	13.7731
	-4.60634	15.8833	-4.62849	15.1919	-4.63644	9.93061	35.3717	13.7731
	-4.43633	15.8829	-4.45849	15.1915	-4.46645	9.93067	35.5417	13.7731
	-4.26632	15.8826	-4.29848	15.1911	-4.30645	9.93074	35.7117	13.7731
	-4.10632	15.8822	-4.12847	15.1907	-4.13645	9.93074	35.8817	13.7731
	-3.93631	15.8819	-3.95846	15.1903	-3.96645	9.93082	36.0417	13.7731
	-3.7663	15.8816	-3.79846	15.19	-3.80645	9.93091	36.2117	13.7732
	-3.6063	15.8812	-3.62845	15.1896	-3.63645	9.93098	36.3817	13.7731
	-3.43629	15.8808	-3.45844	15.1893	-3.46645	9.93104	36.5417	13.7731
	-3.26628	15.8803	-3.29844	15.189	-3.30645	9.93106	36.7117	13.773
	-3.10627	15.8799	-3.12843	15.1887	-3.13645	9.931	36.8817	13.773
	-2.93626	15.8795	-2.95843	15.1884	-2.96645	9.93094	37.0417	13.773
	-2.77625	15.8791	-2.79842	15.1881	-2.79645	9.9309	37.2117	13.773
	-2.60625	15.8787	-2.62841	15.1878	-2.63645	9.93082	37.3817	13.773
	-2.43624	15.8784	-2.45841	15.1875	-2.46645	9.93074	37.5417	13.773
	-2.26624	15.8781	-2.2884	15.1872	-2.30645	9.93064	37.7117	13.773
	-2.10623	15.8777	-2.1284	15.1869	-2.13644	9.93056	37.8717	13.773
	-1.93622	15.8772	-1.95839	15.1867	-1.96644	9.93054	38.0417	13.773
	-1.77621	15.8767	-1.78839	15.1865	-1.80644	9.93046	38.2117	13.773
	-1.6062	15.8763	-1.62839	15.1864	-1.63644	9.93031	38.3817	13.773
	-1.43619	15.8758	-1.45839	15.1863	-1.46644	9.93017	38.5517	13.773
	-1.26618	15.8754	-1.28838	15.1861	-1.29643	9.93	38.7117	13.773
	-1.10617	15.8749	-1.12838	15.186	-1.13643	9.92984	38.8817	13.773
	-0.93616	15.8744	-0.95838	15.186	-0.96643	9.92969	39.0417	13.773
	-0.77615	15.8739	-0.78838	15.186	-0.80642	9.92954	39.2117	13.773
	-0.60615	15.8735	-0.62838	15.1859	-0.63642	9.92929	39.3717	13.7731
	-0.43614	15.873	-0.45838	15.1858	-0.46641	9.92904	39.5417	13.7731
	-0.27613	15.8727	-0.28837	15.1857	-0.30641	9.92879	39.7117	13.7731
	-0.10613	15.8724	-0.12837	15.1856	-0.1364	9.92852	39.8717	13.7732
	0.06388	15.872	0.04163	15.1855	0.0336	9.9283	40.0417	13.7733
	0.23389	15.8717	0.20163	15.1853	0.1936	9.92813	40.2117	13.7733
	0.3939	15.8714	0.37163	15.1853	0.36361	9.928	40.3817	13.7733
	0.5639	15.871	0.54164	15.1851	0.53361	9.92786	40.5417	13.7733
	0.73391	15.8707	0.71164	15.185	0.69361	9.92779	40.7117	13.7733
	0.89391	15.8704	0.87164	15.185	0.86361	9.92771	40.8817	13.7734
	1.06392	15.8702	1.04164	15.1849	1.03361	9.92763	41.0417	13.7734
	1.22392	15.8699	1.21164	15.1849	1.19362	9.92753	41.2117	13.7735
	1.39393	15.8696	1.37164	15.1847	1.36362	9.92742	41.3817	13.7735
	1.56394	15.8693	1.54165	15.1846	1.53362	9.92726	41.5417	13.7737
	1.72394	15.869	1.70165	15.1845	1.69362	9.92717	41.7117	13.7738
	1.89395	15.8688	1.87165	15.1844	1.86363	9.92707	41.8817	13.774
	2.06395	15.8685	2.04166	15.1842	2.03362	9.92703	42.0417	13.7741
	2.22395	15.8683	2.21166	15.184	2.19363	9.92697	42.2117	13.7743
	2.39396	15.8681	2.37166	15.1838	2.36363	9.92692	42.3817	13.7744
	2.56396	15.8678	2.54167	15.1836	2.53363	9.92682	42.5417	13.7745
	2.72397	15.8675	2.71167	15.1834	2.70363	9.92674	42.7117	13.7746
	2.89398	15.8672	2.87168	15.1831	2.86363	9.92667	42.8817	13.7747
	3.06398	15.8668	3.04168	15.1829	3.03363	9.92663	43.0417	13.7748
	3.23399	15.8665	3.21168	15.1827	3.20363	9.92657	43.2117	13.7749
	3.394	15.8662	3.38169	15.1824	3.36363	9.92653	43.3817	13.7751
	3.564	15.8658	3.54169	15.1822	3.53364	9.92645	43.5417	13.7752
	3.73401	15.8654	3.7017	15.1819	3.70364	9.92632	43.7117	13.7755
	3.89402	15.865	3.87171	15.1816	3.86364	9.92615	43.8817	13.7757
	4.06403	15.8646	4.04171	15.1813	4.03365	9.92594	44.0417	13.7759
	4.23404	15.8642	4.21172	15.181	4.19365	9.92573	44.2117	13.776
	4.39404	15.8638	4.37172	15.1808	4.36365	9.92554	44.3817	13.7762
	4.56405	15.8633	4.54173	15.1804	4.53366	9.92536	44.5417	13.7764
	4.73406	15.863	4.70173	15.1801	4.69366	9.9252	44.7117	13.7766
	4.89406	15.8627	4.87174	15.1798	4.86366	9.92508	44.8817	13.7768
	5.06407	15.8624	5.04175	15.1795	5.03367	9.92497	45.0417	13.777
	5.22408	15.8621	5.21175	15.1792	5.19367	9.92483	45.2117	13.7772
	5.39408	15.8618	5.37176	15.1789	5.36367	9.9247	45.3717	13.7774
	5.56409	15.8615	5.54176	15.1786	5.53367	9.92451	45.5416	13.7775
	5.72409	15.8612	5.71177	15.1784	5.69368	9.92434	45.7116	13.7776
	5.8941	15.861	5.87177	15.1781	5.86368	9.9242	45.8817	13.7778
	6.0641	15.8608	6.04178	15.1779	6.03368	9.92409	46.0416	13.778
	6.2241	15.8607	6.21178	15.1777	6.19369	9.92396	46.2116	13.7782
	6.39411	15.8605	6.37179	15.1775	6.36369	9.9238	46.3716	13.7784
	6.56411	15.8603	6.54179	15.1773	6.53369	9.92365	46.5416	13.7786
	6.73412	15.86	6.70179	15.177	6.70369	9.92348	46.7116	13.7787
	6.89412	15.8598	6.8718	15.1769	6.8637	9.92333	46.8816	13.7789
	7.06412	15.8596	7.0418	15.1767	7.0337	9.9232	47.0516	13.779
	7.23413	15.8594	7.2118	15.1766	7.1937	9.9231	47.2116	13.7791
	7.40413	15.8592	7.37181	15.1764	7.3637	9.92303	47.3816	13.7793
	7.56414	15.859	7.54181	15.1762	7.5337	9.92297	47.5416	13.7795
	7.73414	15.8588	7.71181	15.1761	7.6937	9.92293	47.7116	13.7797
	7.89414	15.8585	7.87182	15.1759	7.86371	9.92293	47.8716	13.7798
	8.06415	15.8583	8.04182	15.1757	8.0337	9.92293	48.0416	13.7799
	8.23415	15.8581	8.21182	15.1755	8.20371	9.9229	48.2116	13.78
	8.39416	15.8579	8.37183	15.1754	8.36371	9.92284	48.3816	13.7801
	8.56416	15.8578	8.54183	15.1752	8.53371	9.9228	48.5416	13.7803
	8.73416	15.8577	8.71183	15.175	8.69371	9.92275	48.7116	13.7803
	8.89416	15.8576	8.87184	15.1747	8.86371	9.92273	48.8816	13.7805
	9.06416	15.8575	9.04184	15.1745	9.03371	9.92277	49.0416	13.7806
	9.23417	15.8574	9.21185	15.1742	9.20371	9.92275	49.2116	13.7808
	9.39417	15.8571	9.37186	15.1739	9.36371	9.92277	49.3716	13.781
	9.56418	15.8569	9.54186	15.1737	9.53371	9.92279	49.5416	13.781
	9.73418	15.8567	9.71186	15.1735	9.70371	9.92281	49.7116	13.7811
	9.89418	15.8565	9.87187	15.1733	9.86371	9.92285	49.8716	13.7811
	10.0642	15.8564	10.0419	15.1731	10.0337	9.92291	50.0416	13.7812
	10.2342	15.8564	10.2119	15.1729	10.2037	9.92296	50.2116	13.7812
	10.3942	15.8563	10.3719	15.1728	10.3637	9.92304	50.3816	13.7812
	10.5642	15.8562	10.5419	15.1726	10.5337	9.92314	50.5416	13.7813
	10.7342	15.8561	10.7119	15.1725	10.7037	9.92321	50.7116	13.7813
	10.8942	15.856	10.8719	15.1724	10.8637	9.92327	50.8816	13.7813
	11.0642	15.8559	11.0419	15.1723	11.0337	9.92327	51.0416	13.7813
	11.2342	15.8558	11.2119	15.1722	11.2037	9.92325	51.2116	13.7813
	11.3942	15.8557	11.3719	15.1721	11.3637	9.92322	51.3816	13.7814
	11.5642	15.8556	11.5419	15.1719	11.5337	9.92318	51.5416	13.7814
	11.7342	15.8556	11.7119	15.1718	11.6937	9.9232	51.7116	13.7814
	11.8942	15.8555	11.8819	15.1716	11.8637	9.92326	51.8816	13.7814
	12.0642	15.8555	12.0419	15.1715	12.0337	9.92335	52.0416	13.7813
	12.2342	15.8554	12.2019	15.1713	12.1937	9.92345	52.2116	13.7813
	12.3942	15.8553	12.3719	15.1711	12.3637	9.92352	52.3816	13.7812
	12.5642	15.8553	12.5419	15.1709	12.5337	9.92364	52.5416	13.7812
	12.7342	15.8554	12.7119	15.1707	12.7037	9.92374	52.7116	13.7813
	12.8942	15.8555	12.8719	15.1705	12.8637	9.92383	52.8816	13.7813
	13.0642	15.8555	13.0419	15.1702	13.0337	9.92395	53.0416	13.7814
	13.2242	15.8555	13.2119	15.1699	13.2037	9.92404	53.2116	13.7814
	13.3942	15.8556	13.3719	15.1697	13.3637	9.92416	53.3816	13.7814
	13.5642	15.8556	13.5419	15.1694	13.5337	9.92425	53.5416	13.7814
	13.7342	15.8556	13.7119	15.1692	13.6937	9.92435	53.7116	13.7815
	13.9042	15.8555	13.8819	15.1689	13.8637	9.92437	53.8816	13.7815
	14.0642	15.8555	14.042	15.1686	14.0337	9.92441	54.0416	13.7816
	14.2242	15.8556	14.212	15.1684	14.2037	9.92452	54.2116	13.7816
	14.3942	15.8557	14.372	15.1682	14.3637	9.92471	54.3816	13.7817
	14.5642	15.8558	14.542	15.168	14.5337	9.9249	54.5416	13.7817
	14.7342	15.8559	14.712	15.1678	14.7037	9.92513	54.7116	13.7818
	14.8942	15.8559	14.882	15.1676	14.8637	9.92536	54.8816	13.7819
	15.0642	15.856	15.042	15.1674	15.0336	9.92557	55.0416	13.782
	15.2242	15.856	15.212	15.1673	15.2036	9.92574	55.2116	13.7822
	15.3942	15.856	15.372	15.1672	15.3636	9.92587	55.3816	13.7824
	15.5642	15.8561	15.542	15.1671	15.5336	9.92599	55.5515	13.7826
	15.7242	15.8561	15.712	15.1671	15.7036	9.92618	55.7116	13.7828
	15.8942	15.8561	15.872	15.167	15.8636	9.92635	55.8815	13.783
	16.0642	15.8561	16.052	15.1669	16.0336	9.9265	56.0415	13.7833
	16.2342	15.856	16.212	15.1668	16.2036	9.92663	56.2115	13.7836
	16.3942	15.856	16.372	15.1667	16.3636	9.92669	56.3815	13.7839
	16.5642	15.8559	16.542	15.1666	16.5336	9.92677	56.5415	13.7843
	16.7342	15.8557	16.712	15.1665	16.7036	9.92685	56.7115	13.7847
	16.8942	15.8555	16.872	15.1664	16.8636	9.92696	56.8815	13.7852
	17.0642	15.8554	17.042	15.1664	17.0336	9.92709	57.0415	13.7857
	17.2342	15.8552	17.212	15.1663	17.1936	9.92729	57.2115	13.7861
	17.3942	15.8551	17.372	15.1663	17.3636	9.92746	57.3715	13.7865
	17.5642	15.8549	17.542	15.1661	17.5336	9.92761	57.5415	13.7869
	17.7342	15.8549	17.712	15.166	17.7036	9.92772	57.7115	13.7873
	17.8942	15.8548	17.872	15.166	17.8636	9.9278	57.8815	13.7878
	18.0642	15.8547	18.042	15.1659	18.0336	9.92788	58.0414	13.7882
	18.2342	15.8547	18.212	15.1659	18.1936	9.92796	58.2114	13.7886
	18.3942	15.8546	18.372	15.1659	18.3636	9.92801	58.3814	13.7891
	18.5642	15.8546	18.542	15.1658	18.5336	9.92813	58.5414	13.7896
	18.7342	15.8546	18.712	15.1657	18.7036	9.92826	58.7114	13.7901
	18.8942	15.8545	18.872	15.1656	18.8636	9.92841	58.8814	13.7905
	19.0642	15.8544	19.042	15.1655	19.0336	9.92853	59.0414	13.791
	19.2342	15.8544	19.212	15.1653	19.2036	9.92868	59.2114	13.7915
	19.3942	15.8543	19.372	15.1653	19.3636	9.92879	59.3814	13.792
	19.5642	15.8543	19.542	15.1652	19.5336	9.92887	59.5514	13.7925
	19.7342	15.8543	19.712	15.1651	19.7036	9.929	59.7114	13.793
	19.8942	15.8543	19.872	15.1651	19.8736	9.92919	59.8813	13.7935
	20.0642	15.8544	20.042	15.165	20.0336	9.9294	60.0513	13.7941
	20.2342	15.8544	20.212	15.165	20.2036	9.92963	60.2113	13.7946
	20.4042	15.8543	20.382	15.1649	20.3636	9.92984	60.3813	13.7951
	20.5642	15.8543	20.542	15.1649	20.5336	9.93003	60.5413	13.7957
	20.7342	15.8543	20.702	15.1649	20.7036	9.93024	60.7113	13.7963
	20.8942	15.8543	20.872	15.165	20.8736	9.93045	60.8813	13.7968
	21.0642	15.8543	21.042	15.165	21.0336	9.93065	61.0413	13.7974
	21.2342	15.8542	21.212	15.1649	21.1935	9.93088	61.2112	13.798
	21.3942	15.8541	21.382	15.1648	21.3636	9.93115	61.3812	13.7986
	21.5642	15.854	21.542	15.1648	21.5335	9.93139	61.5412	13.7991
	21.7342	15.8539	21.702	15.1647	21.7035	9.93168	61.7112	13.7996
	21.8942	15.8539	21.872	15.1647	21.8735	9.93192	61.8812	13.8001
	22.0642	15.8539	22.042	15.1648	22.0335	9.93215	62.0412	13.8005
	22.2342	15.8539	22.212	15.1648	22.1935	9.9324	62.2112	13.801
	22.4042	15.854	22.372	15.1649	22.3635	9.9327	62.3812	13.8014
	22.5642	15.854	22.542	15.1649	22.5335	9.933	62.5412	13.8018
	22.7342	15.854	22.712	15.165	22.7035	9.93332	62.7112	13.8023
	22.8942	15.8539	22.872	15.165	22.8635	9.93368	62.8812	13.8026
	23.0642	15.8539	23.042	15.165	23.0335	9.93397	63.0412	13.803
	23.2342	15.8539	23.212	15.165	23.2035	9.93423	63.2112	13.8034
	23.3942	15.8539	23.372	15.1649	23.3635	9.93448	63.3811	13.8038
	23.5642	15.8539	23.542	15.1649	23.5335	9.93474	63.5411	13.8041
	23.7342	15.8539	23.712	15.1648	23.7035	9.93506	63.7111	13.8044
	23.8942	15.8539	23.872	15.1648	23.8635	9.93536	63.8811	13.8047
	24.0642	15.8539	24.042	15.1647	24.0335	9.93563	64.0411	13.8051
	24.2342	15.8539	24.212	15.1647	24.2035	9.93586	64.2111	13.8055
	24.3942	15.8539	24.372	15.1646	24.3635	9.9361	64.3811	13.8058
	24.5642	15.8539	24.542	15.1647	24.5334	9.93635	64.5411	13.8062
	24.7342	15.8538	24.712	15.1647	24.7034	9.93663	64.7111	13.8066
	24.8942	15.8538	24.872	15.1648	24.8634	9.93693	64.8811	13.807
	25.0642	15.8537	25.042	15.1648	25.0334	9.93716	65.0411	13.8074
	25.2342	15.8536	25.212	15.1648	25.2034	9.93741	65.2111	13.8079
	25.3942	15.8535	25.372	15.1648	25.3634	9.93763	65.3811	13.8084
	25.5642	15.8534	25.542	15.1648	25.5334	9.9378	65.541	13.8088
	25.7342	15.8534	25.712	15.1648	25.7034	9.93795	65.711	13.8093
	25.8942	15.8533	25.872	15.1648	25.8634	9.93811	65.881	13.8098
	26.0643	15.8533	26.042	15.1648	26.0334	9.9382	66.041	13.8102
	26.2342	15.8532	26.212	15.1648	26.2034	9.93835	66.211	13.8107
	26.3942	15.8532	26.372	15.1648	26.3634	9.93858	66.381	13.811
	26.5643	15.8532	26.542	15.1648	26.5334	9.93879	66.541	13.8115
	26.7342	15.8532	26.712	15.1648	26.7034	9.93901	66.711	13.812
	26.8942	15.8533	26.872	15.1649	26.8634	9.93922	66.881	13.8124
	27.0643	15.8533	27.042	15.1649	27.0334	9.93941	67.041	13.8128
	27.2342	15.8534	27.212	15.165	27.2034	9.93966	67.211	13.8131
	27.3942	15.8534	27.372	15.165	27.3634	9.93994	67.3809	13.8135
	27.5642	15.8534	27.542	15.1651	27.5334	9.94028	67.5409	13.8138
	27.7342	15.8535	27.712	15.165	27.7034	9.94064	67.7109	13.8142
	27.8942	15.8535	27.872	15.165	27.8634	9.94099	67.8809	13.8146
	28.0642	15.8535	28.042	15.1649	28.0333	9.9413	68.0409	13.8149
	28.2342	15.8535	28.212	15.1649	28.2033	9.94154	68.2109	13.8153
	28.3942	15.8535	28.372	15.1649	28.3733	9.94178	68.3809	13.8157
	28.5642	15.8535	28.542	15.1649	28.5333	9.94205	68.5409	13.8161
	28.7342	15.8535	28.712	15.1648	28.7033	9.94229	68.7109	13.8165
	28.8942	15.8535	28.882	15.1648	28.8633	9.94252	68.8809	13.8169
	29.0642	15.8535	29.042	15.1648	29.0333	9.94277	69.0409	13.8172
	29.2342	15.8535	29.212	15.1648	29.2033	9.94297	69.2109	13.8176
	29.3942	15.8535	29.372	15.1648	29.3633	9.94314	69.3809	13.818
	29.5642	15.8535	29.542	15.1648	29.5333	9.94331	69.5409	13.8185
	29.7342	15.8535	29.712	15.1648	29.7033	9.94348	69.7108	13.8189
	29.8942	15.8535	29.882	15.1647	29.8633	9.94365	69.8808	13.8194
	30.0642	15.8535	30.042	15.1647	30.0333	9.94384	70.0408	13.8198
	30.2342	15.8535	30.212	15.1647	30.2033	9.94399	70.2108	13.8202
	30.4042	15.8535	30.372	15.1648	30.3633	9.94415	70.3808	13.8206
	30.5642	15.8535	30.542	15.1648	30.5333	9.9443	70.5508	13.821
	30.7342	15.8536	30.712	15.1648	30.7033	9.94439	70.7108	13.8215
	30.9042	15.8537	30.882	15.1648	30.8633	9.94445	70.8808	13.8219
	31.0642	15.8537	31.042	15.1649	31.0333	9.94453	71.0408	13.8223
	31.2342	15.8538	31.212	15.1649	31.2033	9.9446	71.2108	13.8227
	31.3942	15.8538	31.372	15.1649	31.3633	9.94472	71.3808	13.8231
	31.5642	15.8539	31.542	15.1649	31.5333	9.94489	71.5508	13.8235
	31.7342	15.8539	31.712	15.165	31.7033	9.94513	71.7108	13.8239
	31.8942	15.8541	31.882	15.165	31.8633	9.94541	71.8807	13.8243
	32.0642	15.8542	32.042	15.1651	32.0333	9.9457	72.0407	13.8248
	32.2342	15.8543	32.212	15.1651	32.2033	9.94594	72.2107	13.8254
	32.3942	15.8543	32.372	15.1651	32.3633	9.94617	72.3807	13.8259
	32.5642	15.8544	32.542	15.1651	32.5433	9.94643	72.5507	13.8264
	32.7342	15.8545	32.712	15.1651	32.7032	9.94677	72.7107	13.8269
	32.8942	15.8546	32.872	15.1651	32.8632	9.94712	72.8807	13.8273
	33.0642	15.8547	33.042	15.1652	33.0332	9.9475	73.0407	13.8278
	33.2342	15.8548	33.212	15.1652	33.2032	9.94786	73.2107	13.8283
	33.3942	15.8549	33.372	15.1652	33.3632	9.94814	73.3807	13.8286
	33.5642	15.8549	33.542	15.1653	33.5332	9.94844	73.5406	13.829
	33.7342	15.8549	33.712	15.1654	33.7032	9.94867	73.7107	13.8294
	33.8942	15.855	33.872	15.1654	33.8632	9.94889	73.8806	13.8297
	34.0642	15.8551	34.042	15.1655	34.0332	9.94917	74.0406	13.83
	34.2342	15.8552	34.212	15.1655	34.2032	9.94944	74.2106	13.8304
	34.3942	15.8553	34.372	15.1656	34.3732	9.94966	74.3806	13.8308
	34.5642	15.8555	34.542	15.1657	34.5332	9.94991	74.5406	13.8311
	34.7342	15.8557	34.712	15.1658	34.7032	9.95013	74.7106	13.8316
	34.8942	15.8558	34.872	15.1658	34.8632	9.95034	74.8806	13.8319
	35.0642	15.8559	35.042	15.1658	35.0332	9.95053	75.0406	13.8323
	35.2342	15.8561	35.212	15.1658	35.2032	9.95068	75.2106	13.8327
	35.4042	15.8562	35.372	15.1659	35.3732	9.95083	75.3806	13.8331
	35.5642	15.8564	35.542	15.166	35.5332	9.95096	75.5506	13.8336
	35.7342	15.8566	35.712	15.1661	35.7032	9.9511	75.7106	13.834
	35.8942	15.8567	35.872	15.1662	35.8631	9.95126	75.8805	13.8344
	36.0642	15.8568	36.042	15.1663	36.0331	9.95142	76.0505	13.8348
	36.2342	15.857	36.212	15.1665	36.2032	9.95157	76.2105	13.8352
	36.3942	15.8572	36.372	15.1666	36.3631	9.9517	76.3805	13.8357
	36.5642	15.8574	36.542	15.1667	36.5331	9.95187	76.5505	13.8362
	36.7342	15.8576	36.712	15.1668	36.7031	9.95211	76.7105	13.8367
	36.8942	15.8579	36.872	15.1669	36.8731	9.95234	76.8805	13.8372
	37.0641	15.8581	37.042	15.167	37.0331	9.95262	77.0505	13.8377
	37.2341	15.8583	37.212	15.167	37.2031	9.95292	77.2105	13.8381
	37.4041	15.8585	37.382	15.1671	37.3631	9.95318	77.3805	13.8385
	37.5641	15.8587	37.542	15.1672	37.5331	9.95345	77.5405	13.8389
	37.7341	15.8589	37.712	15.1672	37.7031	9.95371	77.7104	13.8394
	37.8941	15.8591	37.872	15.1673	37.8731	9.95397	77.8804	13.8398
	38.0641	15.8593	38.042	15.1674	38.0331	9.95427	78.0404	13.8402
	38.2341	15.8596	38.212	15.1675	38.2031	9.95459	78.2104	13.8406
	38.4041	15.8598	38.372	15.1676	38.3631	9.95487	78.3704	13.841
	38.5641	15.8601	38.542	15.1677	38.5331	9.95515	78.5404	13.8415
	38.7341	15.8605	38.712	15.1677	38.7031	9.95545	78.7104	13.8418
	38.8941	15.8608	38.872	15.1677	38.8631	9.95575	78.8804	13.8422
	39.0641	15.861	39.042	15.1677	39.0331	9.95607	79.0404	13.8427
	39.2341	15.8613	39.212	15.1677	39.203	9.95639	79.2104	13.8432
	39.4041	15.8616	39.372	15.1678	39.3631	9.95669	79.3804	13.8436
	39.5641	15.862	39.542	15.1677	39.533	9.95697	79.5404	13.844
	39.7341	15.8623	39.712	15.1677	39.703	9.95725	79.7104	13.8444
	39.8941	15.8626	39.872	15.1677	39.863	9.95752	79.8804	13.8448
	40.0641	15.8629	40.042	15.1677	40.033	9.95772	80.0503	13.8452
	40.2341	15.8633	40.212	15.1678	40.193	9.95795	80.2103	13.8455
	40.3941	15.8636	40.372	15.1678	40.363	9.95819	80.3803	13.8459
	40.564	15.8638	40.552	15.1678	40.533	9.95847	80.5403	13.8463
	40.734	15.8641	40.712	15.1678	40.703	9.95879	80.7103	13.8468
	40.894	15.8644	40.872	15.1678	40.863	9.95922	80.8803	13.8472
	41.064	15.8647	41.042	15.1679	41.033	9.95959	81.0403	13.8476
	41.234	15.865	41.212	15.168	41.203	9.95999	81.2103	13.8481
	41.394	15.8653	41.372	15.168	41.363	9.96032	81.3803	13.8485
	41.564	15.8656	41.542	15.1682	41.533	9.9606	81.5403	13.8489
	41.734	15.8658	41.712	15.1683	41.703	9.96094	81.7103	13.8493
	41.894	15.866	41.882	15.1684	41.863	9.96124	81.8803	13.8498
	42.064	15.8663	42.042	15.1685	42.033	9.96158	82.0402	13.8502
	42.234	15.8665	42.212	15.1686	42.203	9.9619	82.2102	13.8507
	42.394	15.8668	42.372	15.1688	42.3629	9.96227	82.3802	13.851
	42.564	15.8671	42.5419	15.1689	42.5329	9.96262	82.5402	13.8515
	42.734	15.8673	42.712	15.169	42.7029	9.96296	82.7102	13.8519
	42.894	15.8675	42.8719	15.1691	42.8629	9.9633	82.8802	13.8523
	43.064	15.8677	43.0419	15.1693	43.0329	9.96362	83.0502	13.8528
	43.234	15.868	43.2119	15.1694	43.2029	9.9639	83.2102	13.8532
	43.404	15.8682	43.3719	15.1694	43.3629	9.96418	83.3802	13.8537
	43.5639	15.8685	43.5419	15.1695	43.5329	9.96446	83.5502	13.8541
	43.734	15.8687	43.7119	15.1696	43.7029	9.96472	83.7102	13.8544
	43.8939	15.869	43.8819	15.1696	43.8629	9.96498	83.8802	13.8548
	44.0639	15.8692	44.0419	15.1697	44.0329	9.96521	84.0502	13.8552
	44.2339	15.8695	44.2119	15.1698	44.2029	9.96541	84.2101	13.8555
	44.4039	15.8698	44.3719	15.1699	44.3729	9.96569	84.3801	13.8559
	44.5639	15.87	44.5419	15.17	44.5329	9.96597	84.5401	13.8563
	44.7339	15.8703	44.7119	15.17	44.7029	9.96629	84.7101	13.8567
	44.8939	15.8706	44.8819	15.1701	44.8729	9.96663	84.8801	13.857
	45.0639	15.8709	45.0419	15.1701	45.0329	9.96696	85.0501	13.8575
	45.2339	15.8713	45.2119	15.1702	45.2028	9.96732	85.2101	13.8579
	45.3939	15.8716	45.3819	15.1703	45.3728	9.96764	85.3801	13.8583
	45.5639	15.872	45.5419	15.1704	45.5328	9.9679	85.5501	13.8588
	45.7339	15.8724	45.7119	15.1704	45.7028	9.96812	85.7101	13.8592
	45.9039	15.8728	45.8819	15.1704	45.8628	9.96833	85.8801	13.8597
	46.0639	15.8732	46.0419	15.1704	46.0328	9.96852	86.04	13.8601
	46.2338	15.8736	46.2119	15.1704	46.2028	9.96869	86.21	13.8605
	46.3938	15.874	46.3719	15.1704	46.3628	9.9688	86.38	13.8609
	46.5638	15.8743	46.5419	15.1705	46.5328	9.96893	86.55	13.8613
	46.7338	15.8747	46.7119	15.1705	46.7028	9.96904	86.71	13.8617
	46.9038	15.8751	46.8719	15.1704	46.8628	9.96919	86.88	13.8621
	47.0638	15.8755	47.0419	15.1704	47.0328	9.96938	87.04	13.8625
	47.2338	15.8759	47.2119	15.1705	47.2028	9.96957	87.21	13.8629
	47.4038	15.8763	47.3719	15.1705	47.3628	9.96979	87.38	13.8633
	47.5638	15.8767	47.5419	15.1705	47.5328	9.97002	87.55	13.8636
	47.7338	15.8771	47.7119	15.1705	47.7028	9.97017	87.71	13.8639
	47.9038	15.8775	47.8819	15.1705	47.8628	9.97034	87.88	13.8643
	48.0738	15.878	48.0419	15.1706	48.0328	9.97051	88.05	13.8646
	48.2338	15.8783	48.2119	15.1706	48.2028	9.97069	88.21	13.8649
	48.3937	15.8786	48.3819	15.1707	48.3728	9.9709	88.3799	13.8652
	48.5637	15.8789	48.5419	15.1707	48.5328	9.97113	88.5499	13.8656
	48.7337	15.8792	48.7119	15.1708	48.7028	9.97137	88.7099	13.866
	48.8937	15.8794	48.8819	15.1709	48.8628	9.97161	88.8799	13.8663
	49.0637	15.8797	49.0419	15.171	49.0328	9.97187	89.0399	13.8667
	49.2337	15.88	49.2119	15.1712	49.2028	9.97215	89.2099	13.8671
	49.3937	15.8803	49.3719	15.1714	49.3727	9.97245	89.3799	13.8675
	49.5637	15.8806	49.5419	15.1714	49.5327	9.97279	89.5399	13.8679
	49.7337	15.8809	49.7119	15.1715	49.7027	9.97312	89.7099	13.8684
	49.8937	15.8811	49.8819	15.1716	49.8627	9.97346	89.8799	13.8688
	50.0737	15.8814	50.0419	15.1718	50.0327	9.97378	90.0399	13.8692
	50.2337	15.8817	50.2119	15.172	50.2027	9.97406	90.2099	13.8696
	50.3937	15.882	50.3719	15.1721	50.3627	9.97425	90.3799	13.87
	50.5637	15.8823	50.5419	15.1723	50.5327	9.97445	90.5399	13.8705
	50.7337	15.8826	50.7119	15.1725	50.7027	9.97462	90.7098	13.871
	50.8937	15.8829	50.8719	15.1727	50.8627	9.97481	90.8798	13.8715
	51.0637	15.8832	51.0419	15.1729	51.0327	9.97501	91.0498	13.872
	51.2337	15.8834	51.2119	15.173	51.2027	9.97526	91.2098	13.8725
	51.3937	15.8836	51.3819	15.1732	51.3627	9.97552	91.3798	13.873
	51.5637	15.8839	51.5419	15.1733	51.5327	9.97582	91.5498	13.8735
	51.7336	15.8841	51.7119	15.1734	51.7027	9.97606	91.7098	13.8739
	51.8936	15.8844	51.8819	15.1735	51.8727	9.97634	91.8798	13.8743
	52.0636	15.8846	52.0419	15.1736	52.0327	9.97664	92.0498	13.8748
	52.2336	15.8849	52.2119	15.1737	52.2027	9.97692	92.2098	13.8753
	52.3936	15.8851	52.3819	15.1737	52.3627	9.97718	92.3798	13.8757
	52.5636	15.8854	52.5419	15.1738	52.5326	9.97744	92.5397	13.8761
	52.7336	15.8856	52.7119	15.1739	52.7026	9.97768	92.7097	13.8765
	52.8936	15.8858	52.8719	15.174	52.8626	9.97791	92.8797	13.8769
	53.0636	15.886	53.0418	15.1742	53.0326	9.97812	93.0497	13.8773
	53.2336	15.8862	53.2118	15.1744	53.2026	9.97832	93.2097	13.8777
	53.4036	15.8865	53.3818	15.1745	53.3726	9.97853	93.3797	13.8782
	53.5636	15.8867	53.5418	15.1746	53.5326	9.97875	93.5497	13.8787
	53.7336	15.887	53.7118	15.1747	53.7026	9.97901	93.7097	13.8792
	53.8936	15.8872	53.8818	15.1748	53.8726	9.97922	93.8797	13.8796
	54.0636	15.8875	54.0418	15.175	54.0326	9.97944	94.0497	13.8801
	54.2336	15.8878	54.2118	15.1751	54.2026	9.97961	94.2096	13.8805
	54.4036	15.8881	54.3718	15.1752	54.3726	9.97974	94.3796	13.8809
	54.5636	15.8885	54.5418	15.1753	54.5326	9.97988	94.5396	13.8813
	54.7336	15.8888	54.7118	15.1754	54.7026	9.97999	94.7096	13.8818
	54.8935	15.8892	54.8718	15.1756	54.8626	9.98018	94.8796	13.8822
	55.0635	15.8895	55.0418	15.1758	55.0326	9.98037	95.0496	13.8827
	55.2335	15.8898	55.2118	15.176	55.2026	9.98057	95.2096	13.8831
	55.4035	15.8902	55.3718	15.1762	55.3626	9.98078	95.3796	13.8835
	55.5635	15.8906	55.5418	15.1764	55.5326	9.981	95.5496	13.884
	55.7335	15.891	55.7118	15.1766	55.7026	9.98123	95.7096	13.8844
	55.8935	15.8914	55.8818	15.1768	55.8626	9.98143	95.8796	13.8849
	56.0635	15.8918	56.0418	15.177	56.0326	9.98166	96.0496	13.8854
	56.2335	15.8922	56.2118	15.1772	56.2026	9.98188	96.2095	13.8858
	56.4035	15.8926	56.3718	15.1774	56.3626	9.98211	96.3795	13.8863
	56.5735	15.893	56.5518	15.1776	56.5326	9.98235	96.5395	13.8867
	56.7335	15.8933	56.7118	15.1778	56.7026	9.98257	96.7095	13.8871
	56.8935	15.8936	56.8818	15.1779	56.8625	9.98274	96.8795	13.8875
	57.0635	15.8939	57.0418	15.1781	57.0325	9.98291	97.0495	13.8879
	57.2334	15.8942	57.2118	15.1782	57.2025	9.98314	97.2095	13.8883
	57.4034	15.8945	57.3818	15.1784	57.3625	9.98338	97.3795	13.8886
	57.5634	15.8948	57.5418	15.1785	57.5325	9.98364	97.5495	13.889
	57.7334	15.895	57.7118	15.1786	57.7025	9.98392	97.7095	13.8894
	57.8934	15.8953	57.8818	15.1788	57.8625	9.98416	97.8795	13.8897
	58.0634	15.8956	58.0418	15.179	58.0325	9.98433	98.0395	13.8901
	58.2334	15.8959	58.2118	15.179	58.2025	9.98444	98.2195	13.8904
	58.3934	15.8963	58.3717	15.1791	58.3725	9.98454	98.3795	13.8909
	58.5634	15.8966	58.5418	15.1792	58.5325	9.98464	98.5394	13.8913
	58.7334	15.8969	58.7118	15.1793	58.7025	9.98475	98.7094	13.8917
	58.8934	15.8971	58.8817	15.1795	58.8625	9.98485	98.8794	13.8921
	59.0634	15.8973	59.0417	15.1797	59.0325	9.98494	99.0494	13.8925
	59.2334	15.8975	59.2117	15.1798	59.2025	9.98503	99.2094	13.8929
	59.4034	15.8978	59.3717	15.18	59.3625	9.98511	99.3794	13.8933
	59.5634	15.8979	59.5417	15.1802	59.5325	9.98519	99.5394	13.8938
	59.7334	15.8981	59.7117	15.1804	59.7025	9.98528	99.7094	13.8942
	59.8934	15.8983	59.8717	15.1806	59.8725	9.98532	99.8794	13.8947
	60.0634	15.8985	60.0417	15.1807	60.0325	9.9854	100.049	13.8951
	60.2334	15.8988	60.2117	15.1809	60.2025	9.9855	100.209	13.8956
	60.4034	15.899	60.3817	15.1811	60.3725	9.98561	100.379	13.8961
	60.5633	15.8992	60.5417	15.1813	60.5325	9.98574	100.549	13.8966
	60.7334	15.8994	60.7117	15.1815	60.7025	9.98584	100.709	13.897
	60.9034	15.8996	60.8817	15.1816	60.8625	9.98588	100.879	13.8975
	61.0633	15.8998	61.0417	15.1817	61.0325	9.98587	101.049	13.898
	61.2333	15.9	61.2117	15.1818	61.2025	9.98585	101.209	13.8985
	61.3933	15.9002	61.3817	15.1819	61.3725	9.98589	101.379	13.8989
	61.5633	15.9005	61.5417	15.182	61.5325	9.98597	101.549	13.8994
	61.7333	15.9007	61.7117	15.1821	61.7025	9.98604	101.709	13.8999
	61.8933	15.9009	61.8817	15.1822	61.8725	9.98616	101.879	13.9003
	62.0633	15.9011	62.0417	15.1823	62.0325	9.98629	102.049	13.9007
	62.2333	15.9014	62.2117	15.1823	62.2025	9.98642	102.209	13.901
	62.3933	15.9018	62.3717	15.1824	62.3725	9.98656	102.379	13.9014
	62.5633	15.9022	62.5417	15.1826	62.5325	9.98673	102.549	13.9018
	62.7333	15.9026	62.7117	15.1827	62.7025	9.98686	102.709	13.9022
	62.9033	15.903	62.8817	15.1827	62.8625	9.98701	102.879	13.9026
	63.0633	15.9035	63.0517	15.1828	63.0325	9.98716	103.039	13.903
	63.2333	15.9039	63.2117	15.1829	63.2024	9.98737	103.209	13.9035
	63.4033	15.9043	63.3717	15.183	63.3625	9.98756	103.379	13.9039
	63.5632	15.9048	63.5417	15.1831	63.5324	9.98772	103.549	13.9044
	63.7332	15.9053	63.7117	15.1832	63.7024	9.98786	103.709	13.9048
	63.9032	15.9059	63.8817	15.1834	63.8624	9.98799	103.879	13.9053
	64.0632	15.9065	64.0417	15.1835	64.0324	9.98816	104.049	13.9057
	64.2332	15.9071	64.2117	15.1837	64.2024	9.9884	104.209	13.9061
	64.4032	15.9077	64.3717	15.1839	64.3724	9.98876	104.379	13.9065
	64.5632	15.9082	64.5417	15.1841	64.5324	9.98913	104.539	13.9069
	64.7332	15.9088	64.7117	15.1844	64.7024	9.98944	104.709	13.9073
	64.8932	15.9094	64.8717	15.1845	64.8624	9.98974	104.879	13.9078
	65.0631	15.91	65.0416	15.1848	65.0324	9.99008	105.039	13.9082
	65.2331	15.9106	65.2116	15.185	65.2024	9.99039	105.209	13.9086
	65.3931	15.9112	65.3716	15.1853	65.3624	9.99073	105.379	13.909
	65.5631	15.9119	65.5416	15.1855	65.5324	9.9911	105.539	13.9094
	65.7331	15.9125	65.7116	15.1857	65.7024	9.99147	105.709	13.9099
	65.8931	15.9131	65.8816	15.1859	65.8624	9.99183	105.879	13.9105
	66.0631	15.9137	66.0416	15.1861	66.0324	9.99211	106.049	13.911
	66.2331	15.9144	66.2116	15.1864	66.2024	9.99235	106.209	13.9116
	66.3931	15.9151	66.3716	15.1867	66.3723	9.99263	106.379	13.9121
	66.563	15.9158	66.5416	15.187	66.5323	9.99291	106.539	13.9126
	66.733	15.9165	66.7116	15.1874	66.7023	9.99319	106.709	13.913
	66.893	15.9171	66.8816	15.1877	66.8623	9.99347	106.879	13.9135
	67.063	15.9177	67.0416	15.1881	67.0323	9.99379	107.049	13.9139
	67.233	15.9184	67.2216	15.1886	67.2023	9.99412	107.209	13.9145
	67.403	15.919	67.3816	15.189	67.3723	9.99449	107.379	13.9149
	67.563	15.9197	67.5416	15.1895	67.5323	9.99487	107.549	13.9154
	67.7329	15.9203	67.7115	15.19	67.7023	9.99522	107.709	13.9158
	67.8929	15.9211	67.8815	15.1905	67.8623	9.99559	107.879	13.9163
	68.0629	15.9218	68.0415	15.191	68.0323	9.99602	108.039	13.9168
	68.2329	15.9226	68.2115	15.1916	68.2023	9.99648	108.209	13.9172
	68.4029	15.9233	68.3815	15.1921	68.3723	9.99704	108.379	13.9177
	68.5629	15.924	68.5415	15.1927	68.5323	9.99756	108.539	13.9181
	68.7329	15.9248	68.7115	15.1932	68.7023	9.99811	108.709	13.9185
	68.9028	15.9255	68.8815	15.1937	68.8722	9.99869	108.879	13.9189
	69.0628	15.9262	69.0415	15.1942	69.0322	9.9993	109.049	13.9193
	69.2328	15.9269	69.2114	15.1948	69.2022	9.99991	109.209	13.9197
	69.4028	15.9276	69.3814	15.1953	69.3722	10.0005	109.379	13.92
	69.5628	15.9281	69.5414	15.1957	69.5322	10.0012	109.549	13.9203
	69.7328	15.9287	69.7114	15.1963	69.7022	10.0019	109.709	13.9206
	69.8928	15.9292	69.8814	15.1968	69.8722	10.0027	109.879	13.921
	70.0628	15.9297	70.0414	15.1973	70.0321	10.0034	110.049	13.9213
	70.2327	15.9302	70.2114	15.1979	70.2021	10.0042	110.209	13.9217
	70.3927	15.9308	70.3814	15.1984	70.3721	10.005	110.379	13.9221
	70.5627	15.9313	70.5414	15.199	70.5321	10.0059	110.539	13.9225
	70.7327	15.9319	70.7114	15.1995	70.7021	10.0066	110.709	13.923
	70.9027	15.9324	70.8813	15.2	70.8621	10.0073	110.879	13.9235
	71.0627	15.9329	71.0413	15.2004	71.0421	10.008	111.049	13.9239
	71.2327	15.9334	71.2113	15.2009	71.202	10.0088	111.209	13.9244
	71.4027	15.934	71.3813	15.2014	71.362	10.0095	111.379	13.9249
	71.5627	15.9346	71.5513	15.2019	71.532	10.01	111.539	13.9254
	71.7327	15.9352	71.7113	15.2022	71.702	10.0105	111.709	13.9258
	71.8927	15.9358	71.8713	15.2026	71.862	10.011	111.879	13.9263
	72.0626	15.9364	72.0413	15.203	72.032	10.0114	112.049	13.9268
	72.2326	15.9369	72.2113	15.2034	72.202	10.0118	112.209	13.9272
	72.3926	15.9375	72.3713	15.2038	72.362	10.0122	112.379	13.9276
	72.5626	15.9382	72.5413	15.2043	72.532	10.0126	112.549	13.9281
	72.7326	15.9389	72.7113	15.2047	72.702	10.013	112.709	13.9286
	72.8926	15.9395	72.8713	15.2051	72.8719	10.0134	112.879	13.929
	73.0626	15.9403	73.0412	15.2055	73.0419	10.0138	113.049	13.9295
	73.2325	15.941	73.2112	15.2058	73.2019	10.0142	113.219	13.93
	73.4025	15.9417	73.3712	15.2062	73.3719	10.0147	113.379	13.9305
	73.5725	15.9424	73.5412	15.2066	73.5319	10.0151	113.549	13.931
	73.7325	15.9431	73.7112	15.2069	73.7019	10.0155	113.709	13.9315
	73.8925	15.9438	73.8712	15.2073	73.8619	10.016	113.879	13.932
	74.0625	15.9445	74.0412	15.2077	74.0319	10.0166	114.049	13.9324
	74.2325	15.9451	74.2112	15.2081	74.2019	10.0172	114.209	13.933
	74.3924	15.9458	74.3712	15.2085	74.3719	10.0178	114.379	13.9335
	74.5624	15.9464	74.5412	15.2089	74.5319	10.0183	114.539	13.934
	74.7324	15.9471	74.7112	15.2093	74.7018	10.0189	114.709	13.9346
	74.9024	15.9477	74.8712	15.2097	74.8718	10.0195	114.879	13.9352
	75.0624	15.9484	75.0412	15.2101	75.0318	10.0202	115.039	13.9358
	75.2324	15.949	75.2112	15.2104	75.2018	10.0209	115.209	13.9364
	75.3924	15.9496	75.3711	15.2108	75.3718	10.0216	115.379	13.9369
	75.5624	15.9502	75.5411	15.2112	75.5318	10.0222	115.539	13.9374
	75.7323	15.9507	75.7111	15.2116	75.7018	10.0227	115.709	13.938
	75.8923	15.9514	75.8811	15.2119	75.8618	10.0231	115.879	13.9385
	76.0623	15.952	76.0411	15.2123	76.0318	10.0237	116.049	13.9391
	76.2323	15.9525	76.2111	15.2127	76.2017	10.0242	116.209	13.9396
	76.3923	15.9531	76.3711	15.213	76.3717	10.0248	116.379	13.9401
	76.5623	15.9537	76.5411	15.2134	76.5317	10.0253	116.548	13.9406
	76.7323	15.9542	76.7111	15.2138	76.7017	10.0258	116.708	13.9411
	76.8923	15.9548	76.8711	15.2142	76.8717	10.0262	116.878	13.9415
	77.0623	15.9554	77.0411	15.2146	77.0317	10.0267	117.048	13.942
	77.2322	15.9561	77.2111	15.2149	77.2017	10.0271	117.208	13.9425
	77.4022	15.9567	77.371	15.2153	77.3717	10.0276	117.378	13.943
	77.5622	15.9573	77.541	15.2156	77.5317	10.028	117.548	13.9435
	77.7322	15.9579	77.711	15.2159	77.7017	10.0285	117.708	13.9439
	77.9022	15.9585	77.881	15.2163	77.8717	10.0289	117.878	13.9444
	78.0622	15.9592	78.041	15.2167	78.0316	10.0293	118.048	13.945
	78.2322	15.9598	78.211	15.217	78.2016	10.0297	118.208	13.9455
	78.4022	15.9605	78.371	15.2173	78.3716	10.0299	118.378	13.9459
	78.5622	15.9612	78.541	15.2177	78.5316	10.0302	118.548	13.9464
	78.7321	15.9619	78.711	15.218	78.7016	10.0306	118.708	13.9469
	78.9021	15.9626	78.881	15.2185	78.8616	10.0309	118.878	13.9474
	79.0621	15.9634	79.041	15.2189	79.0316	10.0313	119.048	13.9479
	79.2321	15.9642	79.211	15.2194	79.2016	10.0317	119.208	13.9484
	79.4021	15.9649	79.381	15.2199	79.3616	10.032	119.378	13.9489
	79.5621	15.9657	79.5409	15.2204	79.5316	10.0322	119.548	13.9492
	79.7321	15.9665	79.7109	15.221	79.7016	10.0325	119.708	13.9497
	79.892	15.9673	79.8709	15.2214	79.8616	10.0327	119.878	13.9501
	80.062	15.9681	80.0509	15.2218	80.0316	10.0331	120.048	13.9506
	80.232	15.9688	80.2109	15.2223	80.2016	10.0334	120.208	13.9511
	80.392	15.9696	80.3709	15.2226	80.3715	10.0337	120.378	13.9516
	80.562	15.9703	80.5409	15.223	80.5315	10.0341	120.538	13.9521
	80.732	15.9711	80.7009	15.2233	80.7015	10.0344	120.708	13.9526
	80.9019	15.9718	80.8709	15.2237	80.8615	10.0348	120.878	13.9532
	81.0619	15.9726	81.0409	15.2241	81.0315	10.0352	121.038	13.9537
	81.2319	15.9733	81.2109	15.2245	81.2015	10.0356	121.208	13.9542
	81.3919	15.9741	81.3709	15.2248	81.3715	10.036	121.378	13.9548
	81.5619	15.975	81.5409	15.2252	81.5315	10.0364	121.538	13.9552
	81.7319	15.976	81.7108	15.2257	81.7015	10.0369	121.708	13.9558
	81.8919	15.9769	81.8808	15.2261	81.8615	10.0373	121.878	13.9564
	82.0718	15.9778	82.0408	15.2264	82.0315	10.0378	122.048	13.957
	82.2318	15.9787	82.2108	15.2268	82.2015	10.0382	122.208	13.9576
	82.3918	15.9795	82.3808	15.2272	82.3715	10.0387	122.378	13.9582
	82.5618	15.9804	82.5408	15.2276	82.5315	10.0392	122.548	13.9588
	82.7318	15.9812	82.7108	15.2279	82.7014	10.0397	122.708	13.9593
	82.8918	15.9819	82.8808	15.2284	82.8614	10.0401	122.878	13.9599
	83.0617	15.9827	83.0408	15.2288	83.0314	10.0405	123.038	13.9606
	83.2317	15.9833	83.2108	15.2292	83.2014	10.0409	123.208	13.9612
	83.3917	15.984	83.3808	15.2297	83.3614	10.0414	123.378	13.9619
	83.5617	15.9846	83.5408	15.2302	83.5314	10.0418	123.548	13.9624
	83.7317	15.9851	83.7108	15.2307	83.7014	10.0422	123.708	13.963
	83.8917	15.9857	83.8807	15.2312	83.8714	10.0426	123.878	13.9635
	84.0617	15.9863	84.0407	15.2316	84.0314	10.0429	124.048	13.964
	84.2317	15.987	84.2107	15.232	84.2014	10.0433	124.208	13.9645
	84.3916	15.9876	84.3807	15.2324	84.3714	10.0437	124.378	13.9651
	84.5616	15.9882	84.5407	15.2328	84.5314	10.0441	124.538	13.9657
	84.7316	15.9887	84.7107	15.2332	84.7014	10.0444	124.708	13.9662
	84.8916	15.9892	84.8807	15.2336	84.8713	10.0449	124.878	13.9668
	85.0616	15.9897	85.0407	15.234	85.0313	10.0453	125.048	13.9673
	85.2316	15.9902	85.2107	15.2344	85.2013	10.0457	125.208	13.9678
	85.3916	15.9908	85.3807	15.2348	85.3713	10.0461	125.378	13.9683
	85.5616	15.9914	85.5407	15.2352	85.5313	10.0465	125.548	13.9688
	85.7316	15.9919	85.7107	15.2355	85.7013	10.0469	125.708	13.9694
	85.8915	15.9924	85.8807	15.2358	85.8713	10.0473	125.878	13.97
	86.0615	15.9929	86.0406	15.2361	86.0313	10.0477	126.048	13.9705
	86.2315	15.9935	86.2106	15.2364	86.2013	10.0481	126.208	13.9711
	86.4015	15.994	86.3706	15.2366	86.3713	10.0486	126.378	13.9717
	86.5615	15.9946	86.5506	15.2369	86.5313	10.049	126.548	13.9722
	86.7315	15.9951	86.7106	15.2372	86.7013	10.0494	126.708	13.9728
	86.9015	15.9958	86.8706	15.2374	86.8712	10.0498	126.878	13.9734
	87.0615	15.9965	87.0406	15.2377	87.0312	10.0503	127.048	13.9741
	87.2314	15.9971	87.2106	15.2379	87.2012	10.0507	127.208	13.9747
	87.4014	15.9978	87.3806	15.2383	87.3712	10.0512	127.378	13.9753
	87.5614	15.9985	87.5506	15.2386	87.5312	10.0517	127.548	13.9758
	87.7314	15.9993	87.7106	15.2389	87.7012	10.0522	127.718	13.9764
	87.8914	16.0002	87.8806	15.2392	87.8712	10.0528	127.878	13.977
	88.0614	16.001	88.0406	15.2396	88.0412	10.0534	128.048	13.9775
	88.2314	16.0019	88.2106	15.2399	88.2012	10.0539	128.218	13.9781
	88.3913	16.0028	88.3806	15.2403	88.3712	10.0544	128.378	13.9787
	88.5613	16.0037	88.5506	15.2407	88.5311	10.055	128.548	13.9792
	88.7313	16.0045	88.7105	15.2411	88.7011	10.0555	128.708	13.9797
	88.8913	16.0053	88.8805	15.2416	88.8611	10.0559	128.878	13.9802
	89.0613	16.0061	89.0405	15.2421	89.0411	10.0563	129.048	13.9808
	89.2313	16.0069	89.2105	15.2425	89.2011	10.0567	129.208	13.9813
	89.4013	16.0076	89.3705	15.243	89.3611	10.057	129.378	13.9819
	89.5712	16.0083	89.5405	15.2434	89.5311	10.0573	129.548	13.9825
	89.7312	16.0089	89.7105	15.2439	89.7011	10.0576	129.708	13.9831
	89.9012	16.0097	89.8705	15.2443	89.8611	10.0578	129.878	13.9836
	90.0612	16.0105	90.0405	15.2446	90.0311	10.058	130.048	13.9842
	90.2312	16.0113	90.2105	15.245	90.2011	10.0583	130.218	13.9847
	90.4012	16.0121	90.3705	15.2454	90.3711	10.0585	130.378	13.9852
	90.5611	16.0129	90.5405	15.2458	90.5311	10.0588	130.548	13.9858
	90.7311	16.0138	90.7104	15.2462	90.7011	10.0591	130.708	13.9864
	90.8911	16.0146	90.8704	15.2466	90.8611	10.0593	130.878	13.987
	91.0611	16.0154	91.0404	15.247	91.031	10.0596	131.048	13.9875
	91.2311	16.0163	91.2104	15.2474	91.201	10.0599	131.208	13.9879
	91.3911	16.017	91.3704	15.2478	91.361	10.0603	131.378	13.9884
	91.561	16.0178	91.5404	15.2482	91.531	10.0607	131.548	13.9889
	91.731	16.0186	91.7104	15.2486	91.701	10.0611	131.708	13.9894
	91.891	16.0194	91.8704	15.249	91.861	10.0614	131.878	13.99
	92.061	16.0201	92.0404	15.2495	92.031	10.0618	132.048	13.9906
	92.231	16.0209	92.2104	15.25	92.201	10.0622	132.208	13.9912
	92.391	16.0217	92.3704	15.2506	92.371	10.0627	132.377	13.9917
	92.561	16.0225	92.5404	15.2511	92.531	10.0632	132.547	13.9924
	92.731	16.0232	92.7103	15.2517	92.701	10.0636	132.707	13.993
	92.9009	16.0239	92.8803	15.2523	92.861	10.064	132.877	13.9937
	93.0609	16.0247	93.0403	15.253	93.031	10.0644	133.047	13.9945
	93.2309	16.0254	93.2103	15.2536	93.201	10.0649	133.207	13.9952
	93.4009	16.026	93.3703	15.2543	93.3709	10.0654	133.377	13.9959
	93.5609	16.0266	93.5403	15.2549	93.5309	10.0658	133.547	13.9967
	93.7309	16.0273	93.7103	15.2555	93.7009	10.0663	133.707	13.9974
	93.9009	16.0279	93.8803	15.256	93.8709	10.0667	133.877	13.9982
	94.0608	16.0286	94.0403	15.2565	94.0309	10.0671	134.047	13.999
	94.2308	16.0294	94.2102	15.2571	94.2009	10.0675	134.207	13.9997
	94.4008	16.0301	94.3802	15.2577	94.3709	10.0679	134.377	14.0004
	94.5608	16.0308	94.5402	15.2582	94.5309	10.0682	134.547	14.0011
	94.7308	16.0316	94.7102	15.2588	94.7009	10.0685	134.707	14.0018
	94.9008	16.0323	94.8802	15.2593	94.8609	10.0688	134.877	14.0025
	95.0607	16.0331	95.0502	15.2599	95.0309	10.0692	135.047	14.0032
	95.2307	16.0339	95.2102	15.2604	95.2009	10.0695	135.207	14.0039
	95.4007	16.0347	95.3802	15.261	95.3709	10.07	135.377	14.0046
	95.5607	16.0354	95.5401	15.2615	95.5308	10.0704	135.547	14.0052
	95.7307	16.0361	95.7101	15.262	95.7008	10.0708	135.707	14.006
	95.8907	16.0367	95.8801	15.2625	95.8608	10.0712	135.877	14.0067
	96.0607	16.0375	96.0401	15.263	96.0308	10.0716	136.047	14.0076
	96.2307	16.0382	96.2101	15.2634	96.2008	10.0721	136.207	14.0084
	96.3906	16.039	96.3701	15.2639	96.3708	10.0725	136.377	14.0091
	96.5606	16.0398	96.5401	15.2644	96.5408	10.0729	136.537	14.0098
	96.7306	16.0405	96.7101	15.2648	96.7008	10.0732	136.707	14.0105
	96.8906	16.0413	96.8701	15.2652	96.8608	10.0736	136.877	14.0112
	97.0606	16.0421	97.0401	15.2657	97.0308	10.0739	137.037	14.0119
	97.2306	16.0429	97.2101	15.2662	97.2008	10.0741	137.207	14.0126
	97.3906	16.0436	97.38	15.2666	97.3608	10.0745	137.377	14.0133
	97.5605	16.0444	97.54	15.267	97.5308	10.0748	137.537	14.0139
	97.7305	16.0451	97.71	15.2675	97.7007	10.0751	137.707	14.0144
	97.9005	16.0459	97.88	15.268	97.8607	10.0755	137.877	14.015
	98.0705	16.0466	98.04	15.2684	98.0307	10.0759	138.047	14.0156
	98.2305	16.0473	98.21	15.2689	98.2007	10.0763	138.207	14.0162
	98.4005	16.0481	98.38	15.2694	98.3707	10.0767	138.377	14.0169
	98.5605	16.049	98.54	15.2698	98.5307	10.0771	138.547	14.0176
	98.7304	16.0499	98.71	15.2703	98.7007	10.0775	138.717	14.0183
	98.9004	16.0508	98.88	15.2707	98.8707	10.0779	138.877	14.0191
	99.0604	16.0517	99.04	15.2711	99.0307	10.0784	139.047	14.0198
	99.2304	16.0527	99.21	15.2715	99.2007	10.0789	139.207	14.0204
	99.4004	16.0536	99.3799	15.272	99.3707	10.0794	139.377	14.0211
	99.5603	16.0545	99.5399	15.2724	99.5307	10.0799	139.547	14.0218
	99.7303	16.0553	99.7099	15.2729	99.7006	10.0804	139.707	14.0224
	99.9003	16.0562	99.8799	15.2734	99.8706	10.0808	139.877	14.0232
	100.06	16.0571	100.04	15.274	100.031	10.0814	140.047	14.024
	100.23	16.058	100.21	15.2745	100.201	10.0819	140.207	14.0247
	100.4	16.0589	100.38	15.2751	100.371	10.0825	140.377	14.0255
	100.56	16.0598	100.54	15.2757	100.531	10.0831	140.547	14.0262
	100.73	16.0607	100.71	15.2763	100.701	10.0836	140.717	14.0269
	100.9	16.0616	100.88	15.277	100.871	10.0842	140.877	14.0275
	101.06	16.0625	101.04	15.2777	101.031	10.0847	141.047	14.0282
	101.23	16.0633	101.21	15.2784	101.201	10.0852	141.207	14.029
	101.4	16.0642	101.38	15.279	101.371	10.0857	141.377	14.0298
	101.56	16.0651	101.54	15.2796	101.531	10.0862	141.547	14.0304
	101.73	16.066	101.71	15.2801	101.701	10.0867	141.707	14.0311
	101.89	16.0668	101.88	15.2807	101.871	10.0871	141.877	14.0316
	102.06	16.0676	102.04	15.2814	102.031	10.0876	142.047	14.0321
	102.23	16.0684	102.21	15.282	102.201	10.0881	142.207	14.0328
	102.39	16.0692	102.37	15.2825	102.37	10.0886	142.377	14.0334
	102.56	16.07	102.54	15.283	102.53	10.0891	142.547	14.034
	102.73	16.0709	102.71	15.2835	102.7	10.0897	142.707	14.0347
	102.9	16.0717	102.87	15.284	102.87	10.0902	142.877	14.0355
	103.06	16.0726	103.04	15.2845	103.04	10.0908	143.047	14.0362
	103.23	16.0735	103.21	15.285	103.2	10.0914	143.207	14.0369
	103.4	16.0743	103.37	15.2855	103.37	10.092	143.377	14.0376
	103.56	16.0753	103.54	15.2861	103.53	10.0926	143.547	14.0384
	103.73	16.0761	103.71	15.2866	103.7	10.0931	143.707	14.0392
	103.89	16.077	103.87	15.2871	103.87	10.0937	143.877	14.04
	104.06	16.0778	104.04	15.2877	104.04	10.0943	144.047	14.0408
	104.23	16.0787	104.21	15.2882	104.2	10.0948	144.207	14.0416
	104.4	16.0795	104.37	15.2887	104.37	10.0954	144.377	14.0423
	104.56	16.0803	104.54	15.2892	104.53	10.0959	144.547	14.043
	104.73	16.0811	104.71	15.2897	104.7	10.0964	144.706	14.0437
	104.89	16.082	104.87	15.2903	104.87	10.0969	144.876	14.0444
	105.06	16.0829	105.04	15.291	105.04	10.0974	145.046	14.0452
	105.23	16.0837	105.2	15.2916	105.2	10.0979	145.216	14.0459
	105.39	16.0846	105.37	15.2922	105.37	10.0984	145.376	14.0465
	105.56	16.0854	105.54	15.2927	105.53	10.099	145.546	14.0472
	105.73	16.0863	105.71	15.2933	105.7	10.0995	145.706	14.0479
	105.89	16.0872	105.88	15.2939	105.87	10.1	145.876	14.0486
	106.06	16.0882	106.04	15.2944	106.03	10.1005	146.046	14.0493
	106.23	16.0891	106.21	15.2949	106.2	10.1009	146.206	14.05
	106.4	16.0901	106.37	15.2955	106.37	10.1014	146.376	14.0508
	106.56	16.091	106.539	15.296	106.53	10.1019	146.546	14.0516
	106.73	16.0918	106.709	15.2964	106.7	10.1024	146.716	14.0524
	106.89	16.0927	106.879	15.2969	106.86	10.1029	146.876	14.0532
	107.06	16.0936	107.039	15.2973	107.03	10.1035	147.046	14.0539
	107.23	16.0946	107.209	15.2978	107.2	10.1039	147.206	14.0547
	107.4	16.0955	107.379	15.2982	107.37	10.1044	147.376	14.0553
	107.56	16.0964	107.539	15.2986	107.53	10.1049	147.546	14.056
	107.73	16.0973	107.709	15.2991	107.7	10.1053	147.706	14.0566
	107.899	16.0982	107.879	15.2996	107.86	10.1058	147.876	14.0573
	108.059	16.0992	108.039	15.3001	108.03	10.1062	148.046	14.058
	108.229	16.1001	108.209	15.3006	108.2	10.1066	148.206	14.0586
	108.399	16.101	108.379	15.301	108.37	10.107	148.376	14.0592
	108.559	16.1019	108.539	15.3016	108.53	10.1075	148.546	14.0598
	108.729	16.1029	108.709	15.3021	108.7	10.1079	148.706	14.0605
	108.899	16.1038	108.879	15.3027	108.86	10.1083	148.876	14.0611
	109.059	16.1047	109.039	15.3032	109.03	10.1087	149.046	14.0618
	109.229	16.1057	109.209	15.3038	109.2	10.1091	149.206	14.0625
	109.389	16.1067	109.379	15.3045	109.37	10.1096	149.386	14.0633
	109.559	16.1076	109.539	15.3051	109.53	10.11	149.546	14.064
	109.729	16.1085	109.709	15.3058	109.7	10.1105	149.706	14.0647
	109.899	16.1094	109.879	15.3064	109.86	10.1109	149.876	14.0654
	110.059	16.1103	110.039	15.3071	110.03	10.1114	150.046	14.0661
	110.229	16.1112	110.209	15.3077	110.2	10.1118	150.206	14.0668
	110.389	16.1122	110.369	15.3082	110.37	10.1122	150.376	14.0674
	110.559	16.1131	110.539	15.3088	110.53	10.1125	150.546	14.068
	110.729	16.1141	110.709	15.3095	110.7	10.1128	150.716	14.0687
	110.899	16.115	110.879	15.3102	110.86	10.1132	150.876	14.0693
	111.059	16.116	111.039	15.3109	111.03	10.1136	151.046	14.0699
	111.229	16.117	111.209	15.3115	111.2	10.114	151.206	14.0706
	111.399	16.1179	111.379	15.3121	111.37	10.1144	151.376	14.0713
	111.559	16.1189	111.539	15.3127	111.53	10.1149	151.546	14.0719
	111.729	16.1199	111.709	15.3133	111.7	10.1154	151.706	14.0726
	111.899	16.121	111.879	15.3138	111.87	10.116	151.876	14.0733
	112.059	16.122	112.039	15.3144	112.03	10.1165	152.046	14.074
	112.229	16.1231	112.209	15.315	112.2	10.1171	152.206	14.0748
	112.389	16.1242	112.369	15.3155	112.37	10.1177	152.376	14.0756
	112.559	16.1252	112.539	15.316	112.53	10.1184	152.546	14.0763
	112.729	16.1262	112.709	15.3165	112.7	10.1191	152.706	14.077
	112.889	16.1272	112.879	15.317	112.86	10.1198	152.876	14.0777
	113.059	16.1282	113.039	15.3175	113.03	10.1204	153.046	14.0784
	113.219	16.1291	113.209	15.318	113.2	10.1209	153.206	14.0792
	113.389	16.13	113.369	15.3187	113.36	10.1214	153.376	14.0799
	113.559	16.1309	113.539	15.3193	113.53	10.1219	153.546	14.0806
	113.729	16.1318	113.709	15.3199	113.7	10.1224	153.716	14.0813
	113.899	16.1327	113.879	15.3207	113.86	10.1228	153.876	14.0821
	114.069	16.1334	114.039	15.3214	114.03	10.1232	154.046	14.0829
	114.229	16.1342	114.209	15.322	114.2	10.1237	154.206	14.0837
	114.389	16.135	114.379	15.3226	114.37	10.1241	154.376	14.0844
	114.559	16.1358	114.539	15.3231	114.53	10.1245	154.546	14.0852
	114.729	16.1367	114.709	15.3237	114.7	10.125	154.716	14.0859
	114.889	16.1376	114.869	15.3244	114.87	10.1255	154.876	14.0867
	115.059	16.1385	115.039	15.3251	115.03	10.126	155.046	14.0874
	115.229	16.1394	115.209	15.3257	115.2	10.1266	155.206	14.0881
	115.399	16.1403	115.369	15.3265	115.37	10.1272	155.376	14.0888
	115.559	16.1412	115.539	15.3273	115.53	10.1278	155.536	14.0894
	115.729	16.1423	115.709	15.328	115.7	10.1283	155.706	14.09
	115.899	16.1434	115.869	15.3289	115.87	10.1288	155.876	14.0907
	116.059	16.1445	116.039	15.3298	116.03	10.1294	156.046	14.0914
	116.229	16.1456	116.209	15.3307	116.2	10.1299	156.206	14.0921
	116.399	16.1468	116.379	15.3316	116.37	10.1304	156.376	14.0928
	116.559	16.1479	116.539	15.3325	116.53	10.131	156.536	14.0935
	116.728	16.149	116.709	15.3334	116.7	10.1316	156.706	14.0944
	116.898	16.1501	116.869	15.3341	116.87	10.1322	156.875	14.0953
	117.058	16.1512	117.039	15.3349	117.03	10.1327	157.035	14.0962
	117.228	16.1522	117.209	15.3355	117.2	10.1334	157.205	14.0972
	117.398	16.1532	117.369	15.3363	117.37	10.134	157.375	14.0982
	117.558	16.1543	117.539	15.337	117.53	10.1347	157.535	14.0991
	117.728	16.1554	117.709	15.3378	117.7	10.1354	157.705	14.1
	117.898	16.1564	117.879	15.3385	117.87	10.1361	157.875	14.1008
	118.058	16.1574	118.039	15.3392	118.03	10.1368	158.045	14.1017
	118.228	16.1583	118.209	15.3399	118.2	10.1375	158.205	14.1026
	118.398	16.1593	118.379	15.3405	118.37	10.1381	158.375	14.1034
	118.558	16.1603	118.549	15.3411	118.53	10.1387	158.545	14.1042
	118.728	16.1612	118.709	15.3418	118.7	10.1392	158.705	14.1049
	118.898	16.1622	118.869	15.3424	118.859	10.1398	158.875	14.1057
	119.058	16.1632	119.039	15.343	119.029	10.1404	159.045	14.1065
	119.228	16.1641	119.209	15.3437	119.199	10.1409	159.205	14.1073
	119.398	16.1651	119.379	15.3444	119.359	10.1415	159.375	14.1081
	119.558	16.1661	119.549	15.345	119.529	10.1421	159.545	14.1089
	119.728	16.1671	119.709	15.3456	119.699	10.1427	159.705	14.1097
	119.888	16.1681	119.879	15.3463	119.869	10.1433	159.875	14.1105
	120.058	16.1692	120.038	15.347	120.029	10.1439	160.045	14.1114
	120.228	16.1702	120.208	15.3478	120.199	10.1445	160.205	14.1122
	120.398	16.1713	120.378	15.3485	120.369	10.1451	160.375	14.1129
	120.558	16.1723	120.548	15.3493	120.529	10.1457	160.535	14.1137
	120.728	16.1733	120.708	15.3502	120.699	10.1463	160.705	14.1144
	120.888	16.1743	120.878	15.3511	120.859	10.1469	160.875	14.1152
	121.058	16.1752	121.038	15.3519	121.029	10.1476	161.045	14.116
	121.228	16.1762	121.208	15.3526	121.199	10.1483	161.205	14.1168
	121.388	16.1771	121.378	15.3534	121.359	10.1489	161.375	14.1175
	121.558	16.1781	121.538	15.3542	121.529	10.1496	161.545	14.1183
	121.728	16.179	121.708	15.355	121.699	10.1503	161.705	14.1191
	121.888	16.18	121.878	15.3558	121.859	10.151	161.875	14.12
	122.058	16.1809	122.038	15.3567	122.029	10.1517	162.035	14.1209
	122.228	16.1818	122.208	15.3575	122.199	10.1523	162.215	14.1218
	122.388	16.1827	122.378	15.3584	122.369	10.1528	162.375	14.1227
	122.558	16.1836	122.538	15.3593	122.529	10.1534	162.545	14.1235
	122.728	16.1846	122.708	15.3602	122.699	10.1538	162.705	14.1244
	122.888	16.1855	122.878	15.361	122.869	10.1543	162.875	14.1252
	123.058	16.1866	123.038	15.3618	123.029	10.1548	163.035	14.1261
	123.228	16.1876	123.208	15.3626	123.199	10.1554	163.205	14.127
	123.398	16.1885	123.378	15.3634	123.369	10.1559	163.375	14.1278
	123.558	16.1895	123.538	15.3642	123.529	10.1564	163.535	14.1287
	123.728	16.1905	123.708	15.3649	123.699	10.1569	163.705	14.1296
	123.888	16.1915	123.878	15.3656	123.869	10.1574	163.875	14.1304
	124.058	16.1926	124.038	15.3663	124.029	10.158	164.045	14.1312
	124.228	16.1937	124.208	15.367	124.199	10.1586	164.205	14.1321
	124.388	16.1947	124.378	15.3678	124.369	10.1592	164.375	14.133
	124.558	16.1959	124.548	15.3687	124.529	10.1598	164.535	14.1338
	124.728	16.197	124.708	15.3696	124.699	10.1605	164.705	14.1347
	124.898	16.198	124.878	15.3705	124.869	10.1611	164.875	14.1355
	125.058	16.199	125.038	15.3713	125.039	10.1618	165.045	14.1364
	125.228	16.2	125.208	15.3722	125.199	10.1626	165.205	14.1373
	125.388	16.2009	125.378	15.3731	125.369	10.1634	165.375	14.1383
	125.557	16.2019	125.538	15.374	125.529	10.1641	165.545	14.1392
	125.727	16.2028	125.708	15.3749	125.699	10.1649	165.705	14.1401
	125.897	16.2037	125.878	15.3757	125.869	10.1657	165.875	14.141
	126.057	16.2047	126.038	15.3766	126.029	10.1664	166.045	14.142
	126.227	16.2056	126.208	15.3774	126.199	10.1672	166.205	14.143
	126.397	16.2066	126.378	15.3783	126.369	10.1679	166.375	14.144
	126.557	16.2075	126.548	15.3791	126.529	10.1686	166.545	14.145
	126.727	16.2084	126.708	15.38	126.699	10.1692	166.704	14.146
	126.897	16.2094	126.878	15.3809	126.859	10.1698	166.874	14.1469
	127.057	16.2104	127.048	15.3819	127.029	10.1703	167.044	14.1478
	127.227	16.2114	127.208	15.3827	127.199	10.1709	167.204	14.1487
	127.397	16.2124	127.368	15.3836	127.369	10.1715	167.374	14.1496
	127.557	16.2133	127.538	15.3846	127.529	10.1721	167.544	14.1506
	127.727	16.2142	127.708	15.3856	127.699	10.1728	167.704	14.1516
	127.897	16.2151	127.868	15.3865	127.869	10.1735	167.874	14.1526
	128.057	16.2159	128.038	15.3874	128.029	10.1742	168.044	14.1538
	128.227	16.2168	128.208	15.3884	128.199	10.175	168.204	14.1548
	128.387	16.2177	128.368	15.3894	128.369	10.1757	168.374	14.156
	128.557	16.2186	128.538	15.3904	128.529	10.1765	168.544	14.157
	128.727	16.2196	128.708	15.3913	128.699	10.1774	168.704	14.158
	128.897	16.2205	128.878	15.3922	128.859	10.1783	168.874	14.1591
	129.057	16.2214	129.038	15.3931	129.029	10.1791	169.034	14.1602
	129.227	16.2223	129.208	15.3939	129.199	10.1799	169.204	14.1612
	129.397	16.2233	129.378	15.3947	129.369	10.1807	169.374	14.1623
	129.557	16.2243	129.538	15.3955	129.529	10.1814	169.534	14.1633
	129.727	16.2253	129.708	15.3962	129.699	10.1822	169.704	14.1643
	129.897	16.2263	129.878	15.397	129.869	10.183	169.874	14.1654
	130.067	16.2272	130.038	15.3978	130.029	10.1839	170.044	14.1663
	130.227	16.2283	130.207	15.3985	130.199	10.1847	170.214	14.1674
	130.397	16.2293	130.377	15.3994	130.369	10.1855	170.374	14.1685
	130.557	16.2304	130.537	15.4003	130.529	10.1863	170.544	14.1696
	130.727	16.2314	130.707	15.4011	130.709	10.187	170.714	14.1707
	130.887	16.2325	130.877	15.402	130.869	10.1878	170.874	14.1717
	131.057	16.2336	131.037	15.4029	131.029	10.1885	171.044	14.1726
	131.227	16.2346	131.207	15.4038	131.199	10.1892	171.204	14.1736
	131.387	16.2357	131.377	15.4047	131.359	10.1898	171.374	14.1745
	131.557	16.2368	131.537	15.4056	131.529	10.1905	171.544	14.1754
	131.727	16.2378	131.707	15.4064	131.698	10.1911	171.704	14.1764
	131.897	16.2388	131.867	15.4071	131.868	10.1916	171.874	14.1774
	132.057	16.2398	132.037	15.4079	132.028	10.1923	172.044	14.1783
	132.227	16.2409	132.207	15.4086	132.198	10.1929	172.204	14.1791
	132.397	16.242	132.377	15.4094	132.368	10.1936	172.374	14.18
	132.557	16.243	132.537	15.4102	132.528	10.1942	172.544	14.181
	132.727	16.244	132.707	15.411	132.698	10.1949	172.704	14.1819
	132.897	16.245	132.877	15.4118	132.868	10.1956	172.874	14.1828
	133.057	16.246	133.037	15.4125	133.028	10.1964	173.044	14.1837
	133.227	16.2471	133.207	15.4133	133.198	10.1971	173.204	14.1845
	133.397	16.2481	133.377	15.4141	133.368	10.1979	173.374	14.1852
	133.557	16.2492	133.537	15.4149	133.528	10.1987	173.544	14.1859
	133.727	16.2502	133.707	15.4157	133.698	10.1995	173.704	14.1866
	133.887	16.2513	133.877	15.4166	133.868	10.2002	173.874	14.1874
	134.056	16.2523	134.037	15.4175	134.028	10.2011	174.044	14.1881
	134.226	16.2534	134.207	15.4184	134.198	10.2019	174.204	14.1889
	134.396	16.2544	134.367	15.4193	134.358	10.2028	174.374	14.1897
	134.556	16.2555	134.537	15.4203	134.528	10.2036	174.544	14.1905
	134.726	16.2566	134.707	15.4213	134.698	10.2045	174.704	14.1913
	134.896	16.2577	134.867	15.4223	134.858	10.2054	174.874	14.1921
	135.056	16.2587	135.037	15.4233	135.028	10.2063	175.044	14.193
	135.226	16.2598	135.207	15.4243	135.198	10.2071	175.204	14.1938
	135.396	16.2609	135.367	15.4254	135.368	10.2081	175.374	14.1947
	135.556	16.2619	135.537	15.4263	135.528	10.2089	175.544	14.1956
	135.726	16.263	135.697	15.4272	135.698	10.2097	175.704	14.1964
	135.896	16.2641	135.867	15.4281	135.868	10.2106	175.874	14.1973
	136.056	16.2652	136.037	15.4289	136.028	10.2115	176.043	14.1981
	136.226	16.2663	136.197	15.4298	136.198	10.2124	176.203	14.1989
	136.386	16.2673	136.367	15.4306	136.368	10.2133	176.373	14.1998
	136.556	16.2684	136.537	15.4314	136.528	10.2142	176.533	14.2007
	136.726	16.2696	136.707	15.4323	136.698	10.2151	176.703	14.2016
	136.896	16.2707	136.877	15.4331	136.868	10.2161	176.873	14.2026
	137.056	16.2719	137.037	15.4339	137.038	10.2171	177.033	14.2035
	137.226	16.273	137.207	15.4347	137.198	10.2181	177.203	14.2045
	137.396	16.2741	137.377	15.4355	137.368	10.219	177.373	14.2054
	137.566	16.2753	137.537	15.4363	137.528	10.22	177.533	14.2062
	137.726	16.2765	137.707	15.4372	137.698	10.221	177.703	14.207
	137.886	16.2777	137.877	15.4381	137.858	10.222	177.873	14.2078
	138.056	16.2787	138.037	15.439	138.028	10.223	178.033	14.2086
	138.226	16.2798	138.207	15.4398	138.198	10.224	178.203	14.2094
	138.396	16.2809	138.377	15.4407	138.358	10.2249	178.373	14.2103
	138.556	16.2821	138.547	15.4416	138.528	10.2258	178.533	14.2111
	138.726	16.2832	138.707	15.4425	138.698	10.2267	178.703	14.2119
	138.896	16.2842	138.877	15.4434	138.858	10.2276	178.873	14.2127
	139.056	16.2852	139.047	15.4444	139.028	10.2283	179.043	14.2134
	139.226	16.2861	139.207	15.4454	139.198	10.2291	179.203	14.2141
	139.396	16.287	139.377	15.4463	139.368	10.2298	179.373	14.2148
	139.556	16.2879	139.547	15.4472	139.528	10.2306	179.543	14.2156
	139.726	16.2889	139.707	15.4481	139.698	10.2314	179.703	14.2164
	139.896	16.2899	139.877	15.449	139.858	10.2323	179.873	14.2171
	140.056	16.2909	140.036	15.45	140.028	10.2332	180.043	14.2177
	140.226	16.2919	140.206	15.451	140.198	10.234	180.203	14.2183
	140.396	16.2929	140.366	15.452	140.368	10.2348	180.373	14.2189
	140.556	16.294	140.536	15.4531	140.528	10.2357	180.533	14.2195
	140.726	16.295	140.706	15.4541	140.698	10.2366	180.703	14.2202
	140.896	16.2961	140.866	15.4552	140.868	10.2376	180.873	14.2208
	141.056	16.2971	141.036	15.4562	141.028	10.2386	181.043	14.2215
	141.226	16.2981	141.206	15.4573	141.198	10.2395	181.203	14.2221
	141.396	16.2992	141.366	15.4583	141.368	10.2405	181.373	14.2227
	141.556	16.3001	141.536	15.4593	141.528	10.2414	181.543	14.2234
	141.726	16.301	141.706	15.4604	141.697	10.2424	181.703	14.224
	141.896	16.302	141.876	15.4613	141.867	10.2433	181.873	14.2246
	142.056	16.303	142.036	15.4623	142.027	10.2443	182.043	14.2252
	142.226	16.3039	142.206	15.4632	142.197	10.2452	182.203	14.2258
	142.385	16.3049	142.376	15.4641	142.357	10.2462	182.373	14.2266
	142.555	16.3059	142.546	15.465	142.527	10.2471	182.543	14.2273
	142.725	16.3069	142.706	15.4661	142.697	10.248	182.703	14.228
	142.885	16.308	142.876	15.4672	142.857	10.2489	182.873	14.2287
	143.055	16.3089	143.046	15.4682	143.027	10.2497	183.043	14.2294
	143.225	16.31	143.206	15.4693	143.197	10.2505	183.203	14.2301
	143.395	16.311	143.376	15.4703	143.357	10.2513	183.373	14.2309
	143.555	16.312	143.546	15.4714	143.527	10.2521	183.543	14.2317
	143.725	16.3129	143.706	15.4724	143.697	10.2529	183.703	14.2325
	143.895	16.3139	143.876	15.4735	143.857	10.2538	183.873	14.2333
	144.055	16.3149	144.046	15.4745	144.027	10.2546	184.043	14.2341
	144.225	16.3158	144.206	15.4756	144.197	10.2555	184.213	14.2348
	144.385	16.3167	144.366	15.4766	144.367	10.2563	184.373	14.2357
	144.555	16.3176	144.536	15.4777	144.537	10.2572	184.543	14.2365
	144.725	16.3185	144.706	15.4787	144.697	10.2582	184.713	14.2375
	144.885	16.3193	144.866	15.4798	144.867	10.2591	184.873	14.2383
	145.055	16.3202	145.036	15.4809	145.037	10.2601	185.043	14.2392
	145.225	16.3211	145.206	15.4821	145.197	10.2611	185.203	14.2401
	145.385	16.322	145.366	15.4832	145.367	10.2621	185.373	14.241
	145.555	16.323	145.536	15.4844	145.537	10.2631	185.543	14.2419
	145.725	16.3239	145.706	15.4855	145.697	10.2641	185.703	14.2428
	145.895	16.3248	145.866	15.4867	145.867	10.2651	185.873	14.2438
	146.065	16.3256	146.036	15.4878	146.027	10.2662	186.043	14.2446
	146.225	16.3264	146.206	15.4888	146.197	10.2672	186.203	14.2455
	146.395	16.3273	146.366	15.4899	146.367	10.2682	186.373	14.2463
	146.555	16.3282	146.536	15.4911	146.527	10.2693	186.543	14.2472
	146.725	16.329	146.706	15.4922	146.697	10.2703	186.713	14.2481
	146.895	16.3298	146.866	15.4933	146.867	10.2713	186.873	14.2489
	147.055	16.3306	147.036	15.4945	147.027	10.2723	187.042	14.2498
	147.225	16.3315	147.206	15.4956	147.197	10.2732	187.202	14.2507
	147.395	16.3323	147.366	15.4968	147.367	10.2742	187.372	14.2517
	147.555	16.3332	147.536	15.4981	147.527	10.2751	187.542	14.2526
	147.725	16.3341	147.706	15.4992	147.697	10.276	187.702	14.2535
	147.895	16.335	147.866	15.5004	147.867	10.2768	187.872	14.2544
	148.055	16.3359	148.035	15.5016	148.027	10.2778	188.042	14.2552
	148.225	16.3368	148.205	15.5026	148.197	10.2787	188.202	14.2561
	148.395	16.3377	148.375	15.5037	148.357	10.2795	188.372	14.257
	148.555	16.3386	148.535	15.5049	148.527	10.2803	188.542	14.2579
	148.725	16.3395	148.705	15.506	148.697	10.2812	188.712	14.2588
	148.895	16.3404	148.875	15.5072	148.867	10.282	188.872	14.2596
	149.055	16.3413	149.035	15.5084	149.027	10.2828	189.042	14.2604
	149.225	16.3422	149.205	15.5097	149.197	10.2837	189.212	14.2612
	149.395	16.3431	149.375	15.5109	149.357	10.2846	189.372	14.2621
	149.555	16.344	149.535	15.5122	149.527	10.2855	189.542	14.263
	149.725	16.345	149.705	15.5134	149.697	10.2864	189.712	14.2639
	149.895	16.3459	149.875	15.5146	149.867	10.2874	189.872	14.2648
	150.055	16.3469	150.035	15.5158	150.027	10.2884	190.042	14.2657
	150.225	16.3479	150.205	15.517	150.197	10.2895	190.202	14.2666
	150.395	16.3488	150.375	15.5183	150.367	10.2906	190.372	14.2676
	150.565	16.3498	150.535	15.5195	150.527	10.2918	190.542	14.2685
	150.725	16.3508	150.705	15.5207	150.697	10.2928	190.712	14.2695
	150.895	16.3518	150.865	15.5219	150.867	10.294	190.872	14.2705
	151.055	16.3529	151.035	15.5231	151.026	10.2951	191.042	14.2715
	151.225	16.3539	151.205	15.5243	151.196	10.2962	191.212	14.2725
	151.394	16.3551	151.365	15.5257	151.366	10.2974	191.372	14.2735
	151.554	16.3561	151.535	15.5271	151.526	10.2986	191.542	14.2744
	151.724	16.3572	151.705	15.5284	151.696	10.2997	191.712	14.2754
	151.894	16.3583	151.865	15.5298	151.866	10.3009	191.872	14.2763
	152.054	16.3593	152.035	15.531	152.026	10.302	192.042	14.2772
	152.224	16.3604	152.205	15.5322	152.196	10.3032	192.202	14.2781
	152.384	16.3615	152.375	15.5335	152.356	10.3043	192.372	14.279
	152.554	16.3625	152.545	15.5348	152.526	10.3054	192.532	14.2799
	152.724	16.3635	152.705	15.5361	152.696	10.3065	192.702	14.2807
	152.884	16.3645	152.875	15.5375	152.856	10.3077	192.872	14.2816
	153.054	16.3654	153.035	15.5388	153.026	10.3088	193.032	14.2825
	153.224	16.3664	153.205	15.5401	153.196	10.3099	193.202	14.2833
	153.394	16.3673	153.375	15.5415	153.356	10.3109	193.372	14.2842
	153.554	16.3683	153.535	15.5428	153.526	10.3119	193.532	14.285
	153.724	16.3692	153.705	15.5441	153.696	10.3129	193.702	14.2859
	153.894	16.3701	153.875	15.5454	153.866	10.314	193.872	14.2868
	154.054	16.371	154.035	15.5467	154.026	10.315	194.032	14.2877
	154.224	16.3719	154.205	15.548	154.196	10.3161	194.202	14.2886
	154.394	16.3729	154.365	15.5492	154.366	10.3172	194.372	14.2895
	154.554	16.3739	154.535	15.5503	154.526	10.3182	194.532	14.2904
	154.724	16.3748	154.705	15.5515	154.696	10.3193	194.702	14.2914
	154.894	16.3757	154.864	15.5526	154.866	10.3204	194.872	14.2924
	155.054	16.3767	155.034	15.5537	155.026	10.3215	195.042	14.2935
	155.224	16.3776	155.204	15.5548	155.196	10.3225	195.202	14.2946
	155.394	16.3786	155.364	15.5559	155.366	10.3236	195.372	14.2956
	155.554	16.3796	155.534	15.557	155.526	10.3246	195.542	14.2967
	155.724	16.3806	155.704	15.5581	155.696	10.3257	195.702	14.2978
	155.894	16.3816	155.874	15.5592	155.866	10.3268	195.872	14.2989
	156.054	16.3827	156.034	15.5602	156.026	10.3277	196.042	14.3
	156.224	16.3837	156.204	15.5614	156.196	10.3287	196.201	14.3011
	156.384	16.3847	156.374	15.5625	156.366	10.3297	196.371	14.3023
	156.554	16.3857	156.544	15.5637	156.526	10.3307	197.07	14.3039
	156.724	16.3867	156.704	15.5649	156.696	10.3317	197.662	14.3051
	156.884	16.3877	156.874	15.5662	156.856	10.3326	198.158	14.3065
	157.054	16.3888	157.044	15.5674	157.026	10.3335	198.57	14.3079
	157.224	16.3897	157.204	15.5686	157.196	10.3344	198.907	14.3091
	157.394	16.3908	157.374	15.5699	157.366	10.3352	199.179	14.31
	157.554	16.3918	157.544	15.5712	157.526	10.3361	199.396	14.3107
	157.724	16.3928	157.704	15.5726	157.696	10.337	199.565	14.3118
	157.894	16.3938	157.874	15.574	157.866	10.338	199.694	14.3133
	158.054	16.3949	158.034	15.5754	158.026	10.3389	199.79	14.3132
	158.224	16.3959	158.204	15.5767	158.196	10.3399	199.859	14.3197
	158.384	16.3969	158.374	15.578	158.366	10.3409
	158.554	16.3979	158.534	15.5793	158.526	10.342
	158.724	16.3988	158.704	15.5805	158.696	10.3431
	158.894	16.3998	158.874	15.5818	158.866	10.3442
	159.054	16.4008	159.034	15.5829	159.025	10.3453
	159.224	16.4018	159.204	15.584	159.195	10.3465
	159.394	16.4027	159.364	15.5852	159.365	10.3476
	159.554	16.4037	159.534	15.5865	159.525	10.3487
	159.724	16.4047	159.704	15.5877	159.695	10.3498
	159.894	16.4058	159.864	15.589	159.855	10.3508
	160.054	16.4069	160.034	15.5901	160.025	10.3518
	160.223	16.408	160.204	15.5913	160.195	10.3528
	160.393	16.4091	160.374	15.5924	160.365	10.3538
	160.553	16.4103	160.544	15.5935	160.535	10.3547
	160.723	16.4115	160.704	15.5947	160.695	10.3558
	160.893	16.4126	160.874	15.5959	160.865	10.3568
	161.053	16.4138	161.044	15.597	161.025	10.3577
	161.223	16.4149	161.204	15.5981	161.195	10.3586
	161.393	16.4161	161.374	15.5991	161.365	10.3596
	161.553	16.4172	161.544	15.6001	161.525	10.3605
	161.723	16.4184	161.704	15.6012	161.695	10.3615
	161.893	16.4196	161.874	15.6023	161.865	10.3625
	162.053	16.4208	162.044	15.6035	162.025	10.3635
	162.223	16.4219	162.203	15.6047	162.195	10.3645
	162.383	16.4232	162.373	15.6057	162.365	10.3654
	162.553	16.4244	162.543	15.6067	162.525	10.3664
	162.723	16.4256	162.703	15.6077	162.695	10.3674
	162.883	16.4268	162.873	15.6088	162.855	10.3683
	163.053	16.428	163.033	15.6098	163.025	10.3693
	163.223	16.4292	163.203	15.611	163.195	10.3702
	163.383	16.4303	163.373	15.6122	163.355	10.3712
	163.553	16.4313	163.533	15.6133	163.525	10.3721
	163.723	16.4322	163.703	15.6144	163.695	10.3731
	163.883	16.4332	163.873	15.6156	163.855	10.3741
	164.053	16.4342	164.043	15.6168	164.025	10.375
	164.223	16.4352	164.203	15.6181	164.195	10.3761
	164.383	16.4362	164.373	15.6193	164.355	10.3772
	164.553	16.4371	164.533	15.6216	164.525	10.3782
	164.723	16.438	164.703	15.6237	164.695	10.3792
	164.883	16.4389	164.873	15.6256	164.865	10.3801
	165.053	16.4398	165.033	15.6274	165.035	10.381
	165.223	16.4408	165.203	15.629	165.195	10.3819
	165.393	16.4418	165.373	15.6305	165.365	10.3828
	165.553	16.4428	165.533	15.6321	165.525	10.3836
	165.723	16.4438	165.703	15.6337	165.695	10.3845
	165.893	16.4448	165.873	15.6354	165.865	10.3853
	166.053	16.4458	166.033	15.637	166.025	10.3861
	166.223	16.4469	166.203	15.6385	166.195	10.3869
	166.393	16.448	166.373	15.64	166.365	10.3878
	166.553	16.4491	166.533	15.6414	166.525	10.3887
	166.723	16.4503	166.703	15.6427	166.695	10.3896
	166.893	16.4514	166.863	15.6441	166.865	10.3905
	167.053	16.4525	167.033	15.6454	167.025	10.3914
	167.223	16.4536	167.203	15.6467	167.195	10.3923
	167.393	16.4547	167.373	15.648	167.355	10.3933
	167.553	16.4557	167.533	15.6493	167.525	10.3942
	167.723	16.4567	167.703	15.6506	167.695	10.3952
	167.883	16.4577	167.863	15.6518	167.855	10.3961
	168.052	16.4586	168.033	15.6531	168.024	10.397
	168.222	16.4594	168.203	15.6543	168.194	10.3979
	168.392	16.4603	168.363	15.6555	168.354	10.3989
	168.562	16.4611	168.532	15.6567	168.524	10.3998
	168.722	16.462	168.702	15.6578	168.694	10.4007
	168.892	16.4629	168.862	15.6589	168.854	10.4015
	169.062	16.4639	169.032	15.66	169.024	10.4022
	169.222	16.4648	169.202	15.6611	169.194	10.4028
	169.392	16.4657	169.362	15.6623	169.354	10.4036
	169.562	16.4667	169.532	15.6636	169.524	10.4044
	169.722	16.4678	169.702	15.6649	169.694	10.4049
	169.892	16.4689	169.862	15.6662	169.854	10.4053
	170.052	16.47	170.032	15.6674	170.024	10.4057
	170.222	16.4711	170.202	15.6684	170.194	10.4062
	170.382	16.4721	170.362	15.6699	170.364	10.4068
	170.552	16.4732	170.532	15.6716	170.524	10.4074
	170.722	16.4742	170.702	15.673	170.694	10.4081
	170.882	16.4752	170.862	15.6744	170.864	10.4088
	171.052	16.4762	171.032	15.6757	171.034	10.4094
	171.222	16.4772	171.202	15.6771	171.194	10.4104
	171.392	16.4782	171.362	15.6784	171.364	10.4114
	171.562	16.4794	171.532	15.6798	171.534	10.4124
	171.722	16.4804	171.702	15.6811	171.694	10.4132
	171.892	16.4815	171.872	15.6824	171.864	10.414
	172.052	16.4827	172.032	15.6838	172.024	10.4147
	172.222	16.4838	172.202	15.6852	172.194	10.4155
	172.392	16.4849	172.372	15.6865	172.364	10.4163
	172.552	16.486	172.532	15.6879	172.524	10.4171
	172.722	16.4871	172.702	15.6893	172.694	10.4178
	172.892	16.4883	172.862	15.6906	172.864	10.4185
	173.052	16.4895	173.032	15.6918	173.024	10.4192
	173.222	16.4906	173.202	15.6931	173.194	10.4199
	173.382	16.4917	173.372	15.6943	173.364	10.4206
	173.552	16.4929	173.532	15.6957	173.524	10.4212
	173.722	16.494	173.702	15.697	173.694	10.4219
	173.892	16.4951	173.872	15.6983	173.864	10.4225
	174.052	16.4962	174.042	15.6996	174.024	10.4231
	174.222	16.4973	174.202	15.7009	174.194	10.4238
	174.392	16.4983	174.372	15.7022	174.364	10.4245
	174.552	16.4994	174.532	15.7035	174.524	10.4252
	174.722	16.5005	174.702	15.7048	174.694	10.426
	174.892	16.5015	174.872	15.7061	174.854	10.4269
	175.052	16.5026	175.042	15.7073	175.024	10.4278
	175.222	16.5036	175.201	15.7086	175.194	10.4288
	175.392	16.5047	175.371	15.7098	175.364	10.4297
	175.552	16.5058	175.541	15.7111	175.524	10.4306
	175.722	16.5069	175.701	15.7124	175.694	10.4316
	175.892	16.5081	175.871	15.7136	175.864	10.4325
	176.062	16.5093	176.041	15.7148	176.024	10.4334
	176.221	16.5105	176.201	15.7161	176.184	10.4342
	176.391	16.5117	176.371	15.7174	176.354	10.435
	176.551	16.5129	176.531	15.7187	176.524	10.4358
	176.721	16.5141	176.701	15.7199	176.684	10.4366
	176.881	16.5153	176.861	15.7211	176.854	10.4375
	177.051	16.5165	177.031	15.7223	177.024	10.4382
	177.221	16.5177	177.201	15.7236	177.184	10.4387
	177.381	16.5188	177.361	15.7248	177.354	10.4394
	177.551	16.5199	177.531	15.7262	177.524	10.4401
	177.721	16.521	177.701	15.7275	177.694	10.4408
	177.881	16.522	177.861	15.7288	177.854	10.4415
	178.061	16.5231	178.031	15.7301	178.024	10.4424
	178.221	16.5242	178.201	15.7315	178.194	10.4432
	178.391	16.5252	178.361	15.7328	178.354	10.4441
	178.551	16.5263	178.531	15.7341	178.524	10.4451
	178.721	16.5273	178.701	15.7353	178.694	10.446
	178.891	16.5284	178.871	15.7365	178.854	10.447
	179.051	16.5295	179.031	15.7378	179.024	10.448
	179.221	16.5306	179.201	15.7391	179.193	10.449
	179.381	16.5318	179.371	15.7403	179.363	10.45
	179.551	16.533	179.541	15.7415	179.533	10.451
	179.721	16.5342	179.701	15.7427	179.693	10.4521
	179.891	16.5354	179.871	15.7439	179.863	10.4533
	180.051	16.5367	180.031	15.745	180.033	10.4544
	180.221	16.538	180.201	15.7462	180.193	10.4555
	180.381	16.5394	180.371	15.7473	180.363	10.4565
	180.551	16.5407	180.531	15.7485	180.533	10.4576
	180.721	16.542	180.701	15.7495	180.693	10.4586
	180.891	16.5434	180.871	15.7507	180.863	10.4597
	181.051	16.5448	181.031	15.7518	181.033	10.4607
	181.221	16.5461	181.201	15.753	181.193	10.4618
	181.391	16.5475	181.371	15.7542	181.363	10.4629
	181.551	16.5487	181.531	15.7553	181.533	10.464
	181.721	16.5499	181.701	15.7566	181.693	10.465
	181.881	16.5511	181.871	15.7578	181.863	10.4661
	182.051	16.5522	182.041	15.759	182.033	10.4672
	182.221	16.5534	182.2	15.7602	182.193	10.4684
	182.391	16.5546	182.37	15.7614	182.363	10.4694
	182.551	16.5557	182.54	15.7624	182.533	10.4704
	182.721	16.5569	182.7	15.7635	182.693	10.4714
	182.881	16.558	182.87	15.7647	182.863	10.4724
	183.051	16.5592	183.03	15.7659	183.023	10.4733
	183.221	16.5604	183.2	15.7673	183.193	10.4741
	183.381	16.5615	183.37	15.7685	183.363	10.4749
	183.55	16.5627	183.53	15.7698	183.523	10.4757
	183.72	16.5639	183.7	15.7712	183.693	10.4765
	183.88	16.565	183.86	15.7726	183.863	10.4773
	184.05	16.5661	184.03	15.7741	184.033	10.4782
	184.22	16.5673	184.2	15.7756	184.193	10.4791
	184.39	16.5684	184.36	15.7771	184.363	10.48
	184.56	16.5694	184.53	15.7786	184.523	10.4809
	184.72	16.5705	184.7	15.78	184.693	10.4818
	184.88	16.5716	184.86	15.7813	184.863	10.4827
	185.05	16.5727	185.03	15.7827	185.023	10.4838
	185.22	16.5739	185.2	15.7842	185.193	10.4848
	185.39	16.575	185.37	15.7858	185.353	10.4859
	185.56	16.5761	185.53	15.7873	185.523	10.4869
	185.72	16.5773	185.7	15.7889	185.693	10.488
	185.89	16.5784	185.86	15.7905	185.853	10.4891
	186.06	16.5796	186.03	15.7923	186.023	10.4903
	186.22	16.5808	186.2	15.7941	186.193	10.4915
	186.39	16.582	186.37	15.7959	186.363	10.4926
	186.56	16.5832	186.53	15.7976	186.523	10.4938
	186.72	16.5845	186.7	15.7994	186.693	10.495
	186.89	16.5857	186.87	15.8011	186.863	10.4962
	187.05	16.587	187.03	15.8031	187.023	10.4973
	187.22	16.5883	187.2	15.805	187.193	10.4984
	187.39	16.5896	187.37	15.8069	187.353	10.4995
	187.55	16.5908	187.53	15.8087	187.522	10.5005
	187.72	16.5921	187.7	15.8105	187.692	10.5016
	187.88	16.5934	187.869	15.8123	187.852	10.5027
	188.05	16.5947	188.029	15.8141	188.022	10.5038
	188.22	16.596	188.199	15.816	188.192	10.5048
	188.38	16.5973	188.369	15.818	188.362	10.5059
	188.55	16.5985	188.529	15.8199	188.522	10.5069
	188.72	16.5997	188.699	15.8219	188.692	10.508
	188.89	16.6009	188.859	15.8237	188.862	10.509
	189.05	16.6021	189.029	15.8255	189.022	10.5101
	189.22	16.6033	189.199	15.8274	189.192	10.5112
	189.39	16.6045	189.369	15.8292	189.362	10.5123
	189.55	16.6057	189.529	15.831	189.522	10.5133
	189.72	16.607	189.699	15.8328	189.692	10.5143
	189.89	16.6083	189.869	15.8346	189.862	10.5153
	190.05	16.6095	190.029	15.8364	190.022	10.5164
	190.22	16.6108	190.199	15.8382	190.192	10.5174
	190.39	16.6121	190.369	15.8399	190.362	10.5185
	190.549	16.6134	190.529	15.8418	190.522	10.5196
	190.719	16.6146	190.699	15.8436	190.692	10.5206
	190.889	16.616	190.869	15.8454	190.852	10.5216
	191.049	16.6172	191.039	15.8472	191.022	10.5227
	191.219	16.6185	191.199	15.849	191.192	10.5238
	191.379	16.6197	191.369	15.8507	191.362	10.525
	191.549	16.621	191.529	15.8524	191.522	10.5261
	191.719	16.6222	191.699	15.8541	191.692	10.5273
	191.879	16.6234	191.869	15.8558	191.862	10.5285
	192.049	16.6246	192.029	15.8574	192.022	10.5297
	192.219	16.6259	192.199	15.859	192.192	10.5309
	192.379	16.6272	192.369	15.8605	192.352	10.5321
	192.549	16.6284	192.528	15.8621	192.522	10.5333
	192.719	16.6297	192.698	15.8636	192.692	10.5346
	192.889	16.631	192.858	15.8651	192.852	10.5358
	193.049	16.6323	193.028	15.8666	193.022	10.537
	193.219	16.6335	193.198	15.868	193.182	10.5381
	193.379	16.6348	193.358	15.8694	193.352	10.5391
	193.549	16.6361	193.528	15.8708	193.512	10.5402
	193.709	16.6375	193.698	15.8722	193.682	10.5413
	193.879	16.6388	193.858	15.8736	193.852	10.5423
	194.049	16.6401	194.028	15.875	194.012	10.5434
	194.219	16.6414	194.198	15.8764	194.182	10.5444
	194.379	16.6428	194.358	15.8777	194.352	10.5454
	194.549	16.6441	194.528	15.879	194.522	10.5465
	194.719	16.6455	194.698	15.8803	194.692	10.5477
	194.879	16.6468	194.868	15.8817	194.852	10.5488
	195.049	16.6482	195.038	15.8829	195.022	10.5501
	195.219	16.6495	195.208	15.8842	195.192	10.5512
	195.379	16.6507	195.368	15.8854	195.361	10.5523
	195.549	16.652	195.538	15.8867	195.521	10.5535
	195.719	16.6533	195.698	15.888	195.691	10.555
	195.879	16.6546	195.868	15.8893	195.861	10.5564
	196.049	16.656	196.038	15.8906	196.031	10.5578
	196.219	16.6574	196.198	15.8919	196.191	10.5591
	196.379	16.6588	196.368	15.8933	196.361	10.5605
	196.549	16.6602	196.538	15.8946
	196.719	16.6615	196.708	15.8961
	196.889	16.6629	196.868	15.8976
	197.048	16.6644	197.038	15.8991
	197.218	16.666	197.198	15.9005
	197.388	16.6675	197.368	15.9018
	197.548	16.6691	197.538	15.903
	197.718	16.6707	197.698	15.9042
	197.888	16.6723	197.858	15.9057
	198.058	16.674	198.028	15.9072
	198.218	16.6756	198.188	15.9091
	198.388	16.6774	198.358	15.9113
	198.548	16.6792	198.528	15.9118
	198.718	16.681	198.688	15.911
	198.888	16.6829	198.858	15.9109
	199.048	16.6848	199.028	15.911
	199.218	16.6867	199.188	15.9109
	199.388	16.6885	199.358	15.9107
	199.548	16.6904	199.528	15.9106
	199.718	16.6923	199.698	15.9107
	199.878	16.6941	199.858	15.9107
	200.048	16.6959	200.028	15.9107
	200.218	16.6977	200.198	15.9106
	200.378	16.6995	200.358	15.9104
	200.548	16.7013	200.528	15.9102
	200.718	16.7031	200.698	15.91
	200.878	16.705	200.858	15.9098
	201.048	16.7068	201.028	15.9096
	201.218	16.7085	201.188	15.9094
	201.388	16.7104	201.358	15.9092
	201.558	16.7122	201.528	15.909
	201.718	16.7141	201.698	15.9087
	201.887	16.716	201.868	15.9084
	202.047	16.7179	202.028	15.908
	202.217	16.7197	202.198	15.9078
	202.387	16.7216	202.368	15.9075
	202.547	16.7235	202.538	15.9073
	202.717	16.7254	202.708	15.907
	202.887	16.7274	202.868	15.9068
	203.047	16.7293	203.038	15.9065
	203.217	16.7313	203.208	15.9062
	203.387	16.7333	203.368	15.9059
	203.547	16.7354	203.538	15.9057
	203.717	16.7375	203.708	15.9056
	203.887	16.7397	203.868	15.9054
	204.047	16.7418	204.038	15.9053
	204.217	16.7441	204.198	15.9052
	204.387	16.7463	204.368	15.9051
	204.547	16.7486	204.538	15.905
	204.717	16.7508	204.698	15.9048
	204.877	16.7531	204.868	15.9047
	205.047	16.7554	205.028	15.9045
	205.217	16.7577	205.198	15.9045
	205.377	16.76	205.358	15.9043
	205.547	16.7623	205.528	15.9042
	205.717	16.7646	205.698	15.9041
	205.887	16.7669	205.858	15.904
	206.046	16.7691	206.028	15.9039
	206.216	16.7714	206.198	15.9038
	206.386	16.7736	206.358	15.9038
	206.546	16.7758	206.528	15.9037
	206.716	16.778	206.698	15.9037
	206.886	16.7802	206.868	15.9035
	207.046	16.7824	207.028	15.9034
	207.216	16.7846	207.198	15.9033
	207.386	16.7868	207.368	15.9032
	207.546	16.789	207.528	15.9031
	207.716	16.7912	207.698	15.903
	207.886	16.7936	207.868	15.9028
	208.056	16.7959	208.038	15.9026
	208.216	16.7983	208.198	15.9025
	208.386	16.8006	208.358	15.9025
	208.546	16.8031	208.528	15.9024
	208.716	16.8056	208.698	15.9024
	208.886	16.8083	208.858	15.9024
	209.056	16.811	209.028	15.9024
	209.216	16.8136	209.198	15.9024
	209.386	16.8163	209.368	15.9024
	209.545	16.819	209.528	15.9024
	209.715	16.8218	209.698	15.9024
	209.885	16.8246	209.868	15.9024
	210.055	16.8274	210.038	15.9025
	210.215	16.8302	210.198	15.9025
	210.385	16.8331	210.368	15.9026
	210.545	16.8359	210.538	15.9027
	210.715	16.8388	210.698	15.9028
	210.875	16.8417	210.868	15.903
	211.045	16.8445	211.028	15.9032
	211.215	16.8473	211.198	15.9036
	211.375	16.8501	211.368	15.9039
	211.545	16.8528	211.528	15.9042
	211.715	16.8555	211.698	15.9045
	211.875	16.8581	211.858	15.9051
	212.045	16.8607	212.028	15.9058
	212.215	16.8633	212.198	15.9065
	212.375	16.8658	212.368	15.9071
	212.545	16.8683	212.528	15.9077
	212.714	16.8708	212.688	15.9082
	212.884	16.8734	212.858	15.9088
	213.044	16.8759	213.028	15.9094
	213.214	16.8785	213.188	15.91
	213.384	16.881	213.358	15.9106
	213.544	16.8836	213.528	15.9111
	213.714	16.8863	213.698	15.9118
	213.884	16.889	213.868	15.9125
	214.054	16.8917	214.037	15.9133
	214.214	16.8944	214.197	15.9141
	214.384	16.8972	214.367	15.9149
	214.544	16.9	214.537	15.9157
	214.714	16.9029	214.707	15.9168
	214.884	16.9058	214.867	15.9178
	215.044	16.9088	215.037	15.9188
	215.214	16.9118	215.207	15.9198
	215.384	16.9148	215.367	15.9209
	215.544	16.9178	215.537	15.922
	215.714	16.9208	215.707	15.9231
	215.883	16.9239	215.867	15.9243
	216.043	16.927	216.037	15.9255
	216.213	16.9301	216.197	15.9267
	216.383	16.9333	216.367	15.928
	216.553	16.9365	216.527	15.9293
	216.713	16.9397	216.697	15.9306
	216.883	16.9429	216.857	15.9319
	217.043	16.946	217.027	15.9332
	217.213	16.9491	217.187	15.9346
	217.383	16.9523	217.357	15.936
	217.543	16.9555	217.527	15.9373
	217.713	16.9586	217.697	15.9386
	217.883	16.9618	217.857	15.9399
	218.043	16.965	218.027	15.9413
	218.213	16.9682	218.197	15.9428
	218.383	16.9713	218.367	15.9443
	218.552	16.9745	218.527	15.9457
	218.712	16.9777	218.697	15.9471
	218.882	16.981	218.867	15.9485
	219.042	16.9844	219.037	15.9499
	219.212	16.9877	219.197	15.9515
	219.372	16.9912	219.367	15.953
	219.542	16.9946	219.527	15.9547
	219.712	16.9981	219.707	15.9564
	219.882	17.0015	219.867	15.958
	220.042	17.005	220.037	15.9597
	220.212	17.0085	220.197	15.9616
	220.372	17.012	220.367	15.9635
	220.542	17.0156	220.536	15.9654
	220.712	17.0191	220.706	15.9673
	220.872	17.0226	220.866	15.9692
	221.041	17.0261	221.036	15.9711
	221.211	17.0295	221.196	15.9731
	221.371	17.0329	221.366	15.975
	221.541	17.0363	221.536	15.977
	221.711	17.0398	221.696	15.9789
	221.881	17.0434	221.866	15.9809
	222.041	17.047	222.026	15.9829
	222.211	17.0506	222.196	15.9849
	222.381	17.0541	222.366	15.9869
	222.551	17.0576	222.526	15.989
	222.711	17.0611	222.696	15.9911
	222.881	17.0648	222.866	15.9933
	223.041	17.0684	223.036	15.9954
	223.211	17.0721	223.196	15.9975
	223.381	17.0759	223.356	15.9996
	223.54	17.0797	223.526	16.0018
	223.71	17.0835	223.696	16.004
	223.88	17.0873	223.866	16.0062
	224.04	17.0911	224.026	16.0084
	224.21	17.095	224.196	16.0106
	224.37	17.0989	224.356	16.0128
	224.54	17.1028	224.526	16.015
	224.71	17.1067	224.695	16.0172
	224.87	17.1106	224.855	16.0194
	225.04	17.1145	225.035	16.0215
	225.21	17.1184	225.195	16.0237
	225.38	17.1223	225.355	16.0259
	225.54	17.1262	225.525	16.0281
	225.709	17.1302	225.695	16.0303
	225.879	17.1343	225.855	16.0326
	226.049	17.1384	226.025	16.0348
	226.209	17.1426	226.195	16.037
	226.379	17.1467	226.365	16.0393
	226.549	17.1509	226.535	16.0416
	226.709	17.1552	226.695	16.0439
	226.879	17.1594	226.865	16.0463
	227.039	17.1636	227.035	16.0487
	227.209	17.1679	227.205	16.0511
	227.379	17.1723	227.365	16.0535
	227.539	17.1767	227.525	16.0558
	227.708	17.1812	227.695	16.0581
	227.878	17.1857	227.865	16.0604
	228.038	17.1902	228.025	16.0627
	228.208	17.1947	228.195	16.0651
	228.378	17.1993	228.364	16.0675
	228.548	17.204	228.524	16.07
	228.708	17.2087	228.694	16.0724
	228.878	17.2136	228.864	16.0748
	229.048	17.2184	229.034	16.0773
	229.208	17.2232	229.194	16.0799
	229.378	17.2282	229.364	16.0824
	229.537	17.2332	229.524	16.0849
	229.707	17.2382	229.694	16.0875
	229.877	17.2433	229.864	16.09
	230.037	17.2484	230.024	16.0926
	230.207	17.2536	230.194	16.0952
	230.367	17.2587	230.364	16.0979
	230.537	17.2638	230.524	16.1005
	230.707	17.269	230.694	16.1032
	230.867	17.2741	230.864	16.106
	231.037	17.2793	231.024	16.1088
	231.206	17.2844	231.194	16.1117
	231.366	17.2896	231.364	16.1147
	231.536	17.2949	231.524	16.1176
	231.706	17.3002	231.693	16.1206
	231.876	17.3055	231.863	16.1236
	232.036	17.3109	232.023	16.1265
	232.206	17.3163	232.193	16.1296
	232.376	17.3217	232.353	16.1326
	232.546	17.3272	232.523	16.1357
	232.706	17.3328	232.683	16.1389
	232.875	17.3384	232.853	16.1421
	233.035	17.344	233.023	16.1454
	233.205	17.3497	233.193	16.1488
	233.375	17.3554	233.353	16.1522
	233.545	17.3614	233.523	16.1556
	233.705	17.3675	233.693	16.1591
	233.875	17.3735	233.863	16.1626
	234.035	17.3795	234.023	16.1662
	234.204	17.3855	234.193	16.1697
	234.374	17.3916	234.362	16.1732
	234.534	17.3979	234.522	16.1768
	234.704	17.4047	234.692	16.1804
	234.874	17.4115	234.852	16.184
	235.034	17.4185	235.022	16.1876
	235.204	17.4257	235.192	16.1912
	235.374	17.4329	235.362	16.1948
	235.533	17.4401	235.522	16.1986
	235.703	17.4474	235.692	16.2023
	235.873	17.4547	235.862	16.2061
	236.033	17.4619	236.032	16.21
	236.203	17.4692	236.192	16.2139
	236.363	17.4765	236.362	16.2178
	236.533	17.4837	236.532	16.2218
	236.702	17.4909	236.701	16.2259
	236.872	17.498	236.861	16.2299
	237.032	17.5051	237.031	16.2341
	237.202	17.5124	237.191	16.2383
	237.372	17.5196	237.361	16.2427
	237.532	17.5267	237.521	16.2473
	237.702	17.5334	237.691	16.2518
	237.871	17.5399	237.861	16.2563
	238.031	17.5461	238.021	16.2607
	238.201	17.5522	238.191	16.2652
	238.371	17.5584	238.351	16.2696
	238.541	17.5646	238.52	16.2741
	238.701	17.5705	238.68	16.2786
	238.871	17.5764	238.85	16.2831
	239.031	17.5823	239.02	16.2875
	239.201	17.5881	239.19	16.292
	239.37	17.5938	239.35	16.2965
	239.53	17.5993	239.52	16.3011
	239.7	17.6048	239.69	16.3056
	239.87	17.6102	239.86	16.3102
	240.03	17.6157	240.02	16.3147
	240.2	17.621	240.19	16.3193
	240.36	17.6262	240.36	16.324
	240.53	17.6314	240.519	16.3288
	240.7	17.6365	240.689	16.3336
	240.86	17.6417	240.859	16.3383
	241.029	17.6469	241.029	16.3432
	241.199	17.652	241.189	16.3481
	241.359	17.6566	241.359	16.3531
	241.529	17.6615	241.519	16.358
	241.689	17.6656	241.689	16.3631
	241.859	17.6685	241.859	16.3682
	242.029	17.6718	242.019	16.3733
	242.189	17.6752	242.198	16.3785
	242.359	17.679	242.358	16.3836
	242.529	17.6829	242.518	16.3888
	242.699	17.6869	242.688	16.394
	242.859	17.6907	242.858	16.3992
	243.029	17.6945	243.018	16.4043
	243.198	17.6984	243.188	16.4094
	243.368	17.7022	243.358	16.4146
	243.528	17.7063	243.518	16.4198
	243.698	17.7111	243.688	16.4249
	243.868	17.7163	243.857	16.4301
	244.038	17.7216	244.017	16.4352
	244.198	17.7272	244.187	16.4404
	244.368	17.733	244.357	16.4457
	244.528	17.7392	244.527	16.4509
	244.697	17.7457	244.687	16.4563
	244.867	17.7521	244.857	16.4615
	245.027	17.759	245.027	16.4668
	245.197	17.7662	245.187	16.472
	245.367	17.7733	245.357	16.4772
	245.527	17.7804	245.516	16.4823
	245.697	17.7877	245.686	16.4875
	245.857	17.7949	245.856	16.4927
	246.026	17.8022	246.026	16.4979
	246.196	17.8095	246.186	16.503
	246.366	17.8169	246.366	16.5082
			--	--
		--	--	--
	--	--	--	--
	--	--	--	--
	--	--	--	--
	--	--	--	--
	--	--	--	--
	--	--	--	--
	--	--	--	--
	--	--	--	--
	--	--	--	--
	--	--	--	--
	--	--	--	--
	--	--	--	--
	--	--	--	--
	--	--	--	--
	--	--	--	--
	--	--	--	--
	--	--	--	--
	--	--	--	--
	--	--	--	--
	--	--	--	--
	--	--	--	--
	--	--	--	--
	--	--	--	--
	--	--	--	--
	--	--	--	--
	--	--	--	--
	--	--	--	--
	--	--	--	--
	--	--	--	--
	--	--	--	--
	--	--	--	--
	--	--	--	--
	--	--	--	--
	--	--	--	--
	--	--	--	--
	--	--	--	--
	--	--	--	--
	--	--	--	--
	--	--	--	--
	--	--	--	--
	--	--	--	--
	--	--	--	--
	--	--	--	--
	--	--	--	--
	--	--	--	--
	--	--	--	--
	--	--	--	--
	--	--	--	--
	--	--	--	--
	--	--	--	--
	--	--	--	--
	--	--	--	--
	--	--	--	--
	--	--	--	--
	--	--	--	--
	--	--	--	--
	--	--	--	--
	--	--	--	--
	--	--	--	--
	--	--	--	--
	--	--	--	--
	--	--	--	--
	--	--	--	--
	--	--	--	--
	--	--	--	--
	--	--	--	--
	--	--	--	--
	--	--	--	--
	--	--	--	--
	--	--	--	--
	--	--	--	--
	--	--	--	--
	--	--	--	--
	--	--	--	--
	--	--	--	--
	--	--	--	--
	--	--	--	--
	--	--	--	--
	--	--	--	--
	--	--	--	--
	--	--	--	--
	--	--	--	--
	--	--	--	--
	--	--	--	--
	--	--	--	--
	--	--	--	--
	--	--	--	--
	--	--	--	--
	--	--	--	--
	--	--	--	--
	--	--	--	--
	--	--	--	--
	--	--	--	--
	--	--	--	--
	--	--	--	--
	--	--	--	--
	--	--	--	--
	--	--	--	--
	--	--	--	--
	--	--	--	--
	--	--	--	--
	--	--	--	--
	--	--	--	--
	--	--	--	--
	--	--	--	--
	--	--	--	--
	--	--	--	--
	--	--	--	--
	--	--	--	--
	--	--	--	--
	--	--	--	--
	--	--	--	--
	--	--	--	--
	--	--	--	--
	--	--	--	--
	--	--	--	--
	--	--	--	--
	--	--	--	--
	--	--	--	--
	--	--	--	--
	--	--	--	--
	--	--	--	--
	--	--	--	--
	--	--	--	--
	--	--	--	--
	--	--	--	--
	--	--	--	--
	--	--	--	--
	--	--	--	--
	--	--	--	--
	--	--	--	--
	--	--	--	--
	--	--	--	--
	--	--	--	--
	--	--	--	--
	--	--	--	--
	--	--	--	--
	--	--	--	--
	--	--	--	--
	--	--	--	--
	--	--	--	--
	--	--	--	--
	--	--	--	--
	--	--	--	--
	--	--	--	--
	--	--	--	--
	--	--	--	--
	--	--	--	--
	--	--	--	--
	--	--	--	--
	--	--	--	--
	--	--	--	--
	--	--	--	--
	--	--	--	--
	--	--	--	--
	--	--	--	--
	--	--	--	--
	--	--	--	--
	--	--	--	--
	--	--	--	--
	--	--	--	--
	--	--	--	--
	--	--	--	--
	--	--	--	--
	--	--	--	--
	--	--	--	--
	--	--	--	--
	--	--	--	--
	--	--	--	--
	--	--	--	--
	--	--	--	--
	--	--	--	--
	--	--	--	--
	--	--	--	--
	--	--	--	--
	--	--	--	--
	--	--	--	--
	--	--	--	--
	--	--	--	--
	--	--	--	--
	--	--	--	--
	--	--	--	--
	--	--	--	--
	--	--	--	--
	--	--	--	--
	--	--	--	--
	--	--	--	--
	--	--	--	--
	--	--	--	--
	--	--	--	--
	--	--	--	--
	--	--	--	--
	--	--	--	--
	--	--	--	--
	--	--	--	--
	--	--	--	--
	--	--	--	--
	--	--	--	--
	--	--	--	--
	--	--	--	--
	--	--	--	--
	--	--	--	--
	--	--	--	--
	--	--	--	--
	--	--	--	--
	--	--	--	--
	--	--	--	--
	--	--	--	--
	--	--	--	--
	--	--	--	--
	--	--	--	--
	--	--	--	--
	--	--	--	--
	--	--	--	--
	--	--	--	--
	--	--	--	--
	--	--	--	--
	--	--	--	--
	--	--	--	--
	--	--	--	--
	--	--	--	--
	--	--	--	--
	--	--	--	--
	--	--	--	--
	--	--	--	--
	--	--	--	--
	--	--	--	--
	--	--	--	--
	--	--	--	--
	--	--	--	--
	--	--	--	--
	--	--	--	--
	--	--	--	--
	--	--	--	--
	--	--	--	--
	--	--	--	--
	--	--	--	--
	--	--	--	--
	--	--	--	--
	--	--	--	--
	--	--	--	--
	--	--	--	--
	--	--	--	--
	--	--	--	--
	--	--	--	--
	--	--	--	--
	--	--	--	--
	--	--	--	--
	--	--	--	--
	--	--	--	--
	--	--	--	--
	--	--	--	--
	--	--	--	--
	--	--	--	--
	--	--	--	--
[truncated: 3,783 more rows]

## Sheet: x-PDB-0-F5-SEBS WE cell
Test Start Time :	2024-03-05 18:57:52
Cell Square :	5
Test Cycle :	16_8
Test Scenario :	231208 - WE method(10s) - 50A.scn
Date/Time	CycleTime	Loader	Loader SV	Voltage(V)	Current(A)	Watt(W)	A/㎠	W/㎠	Cell(℃)	An_Bufferheater(℃)	An_LineHeater(℃)	An_Separator(℃)	Ca_Bufferheater(℃)	Ca_Lineheater(℃)	Ca_Separator(℃)	An_Pump(cc/min)	Ca_Pump(cc/min)	An_In Pressure(bar)	An_Out Pressure(bar)	Ca_In Pressure(bar)	Ca_Out Pressure(bar)	H2 Sensor(ppm)	Tank Temp(℃)	Cell (V) 1
2024-03-05 20:15:32	00:00:05	Charge/CC	1.35	0.046	0	0	0	0	70.5	43.9	49.9	21.1	46.2	49.8	20.8	10	10	0.02	0	0.07	0.03	201	N/A
2024-03-05 20:15:33	00:00:06	Charge/CC	1.35	0.046	0	0	0	0	70.5	43.9	49.9	21.1	46.2	49.8	20.8	10	10	0.02	0	0.07	0.03	201	N/A
2024-03-05 20:15:34	00:00:07	Charge/CC	1.35	0.046	0	0	0	0	70.5	43.9	49.9	21.1	46.2	49.8	20.8	10	10	0.02	0	0.07	0.03	201	N/A
2024-03-05 20:15:35	00:00:08	Charge/CC	1.35	0.04	0	0	0	0	68.8	43.5	49.9	21.1	46.2	49.8	20.8	10	10	0.02	0	0.07	0.03	201	N/A
2024-03-05 20:15:36	00:00:09	Charge/CC	1.35	1.35	0.048	0.065	0.01	0.013	68.8	43.5	49.9	21.1	45.7	49.8	20.8	10	10	0.02	0	0.07	0.03	201	N/A
2024-03-05 20:15:37	00:00:10	Charge/CC	1.35	1.35	0.041	0.055	0.008	0.011	68.8	43.5	49.9	21.1	45.7	49.8	20.8	10	10	0	0	0.04	0.03	201	N/A
2024-03-05 20:15:38	00:00:11	Charge/CC	1.35	1.35	0	0	0	0	68.8	43.5	49.9	21.1	45.7	49.8	20.8	10	10	0	0	0.04	0.02	201	N/A
2024-03-05 20:15:39	00:00:12	Charge/CC	1.35	1.35	0	0	0	0	68.8	43.5	49.9	21.1	45.7	49.8	20.8	10	10	0	0	0.04	0.02	201	N/A
2024-03-05 20:15:40	00:00:13	Charge/CC	1.35	1.35	0	0	0	0	67.3	43.5	49.9	21.1	45.7	49.8	20.8	10	10	0	0	0.04	0.02	201	N/A
2024-03-05 20:15:41	00:00:14	Charge/CC	1.35	1.35	0.041	0.056	0.008	0.011	67.3	43.3	49.9	21.2	45.5	49.9	20.8	10	10	0	0	0.04	0.02	201	N/A
2024-03-05 20:15:42	00:00:15	Charge/CC	1.35	1.35	0	0	0	0	67.3	43.3	49.9	21.2	45.5	49.9	20.7	10	10	0	0	0.04	0.02	201	N/A
2024-03-05 20:15:43	00:00:16	Charge/CC	1.36	1.35	0	0	0	0	67.3	43.3	49.9	21.2	45.5	49.9	20.7	10	10	0	0	0.05	0.02	200	N/A
2024-03-05 20:15:44	00:00:17	Charge/CC	1.36	1.35	0	0	0	0	67.3	43.3	49.9	21.2	45.5	49.9	20.7	10	10	0	0	0.05	0.02	200	N/A
2024-03-05 20:15:45	00:00:18	Charge/CC	1.36	1.36	0.041	0.056	0.008	0.011	67.3	43.3	49.9	21.2	45.5	49.9	20.7	10	10	0	0	0.05	0.02	200	N/A
2024-03-05 20:15:46	00:00:19	Charge/CC	1.36	1.36	0	0	0	0	66.7	43.1	49.9	21.1	45.5	49.9	20.7	10	10	0	0	0.05	0.02	200	N/A
2024-03-05 20:15:47	00:00:20	Charge/CC	1.36	1.36	0.042	0.057	0.008	0.011	66.7	43.1	49.9	21.1	45.2	49.9	20.8	10	10	0	0	0.05	0.02	200	N/A
2024-03-05 20:15:48	00:00:21	Charge/CC	1.36	1.36	0	0	0	0	66.7	43.1	49.9	21.1	45.2	49.9	20.8	10	10	0	0	0.04	0.02	200	N/A
2024-03-05 20:15:49	00:00:22	Charge/CC	1.36	1.36	0	0	0	0	66.7	43.1	49.9	21.1	45.2	49.9	20.8	10	10	0	0	0.04	0.02	201	N/A
2024-03-05 20:15:50	00:00:23	Charge/CC	1.36	1.36	0	0	0	0	66.7	43.1	49.9	21.1	45.2	49.9	20.8	10	10	0	0	0.04	0.02	201	N/A
2024-03-05 20:15:51	00:00:24	Charge/CC	1.36	1.36	0.041	0.055	0.008	0.011	66.5	42.9	49.9	21.1	45.2	49.9	20.8	10	10	0	0	0.04	0.02	201	N/A
2024-03-05 20:15:52	00:00:25	Charge/CC	1.36	1.36	0	0	0	0	66.5	42.9	49.9	21.1	45	49.8	20.8	10	10	0	0	0.04	0.02	201	N/A
2024-03-05 20:15:53	00:00:26	Charge/CC	1.37	1.36	0	0	0	0	66.5	42.9	49.9	21.1	45	49.8	20.7	10	10	0	0	0.04	0.02	201	N/A
2024-03-05 20:15:54	00:00:27	Charge/CC	1.37	1.36	0	0	0	0	66.5	42.9	49.9	21.1	45	49.8	20.7	10	10	0	0	0.05	0.02	201	N/A
2024-03-05 20:15:55	00:00:28	Charge/CC	1.37	1.37	0.041	0.057	0.008	0.011	66.5	42.9	49.9	21.1	45	49.8	20.7	10	10	0	0	0.05	0.02	201	N/A
2024-03-05 20:15:56	00:00:29	Charge/CC	1.37	1.37	0.041	0.056	0.008	0.011	66.5	42.9	49.9	21.1	45	49.8	20.7	10	10	0	0	0.05	0.02	201	N/A
2024-03-05 20:15:57	00:00:30	Charge/CC	1.37	1.37	0.041	0.057	0.008	0.011	66.4	42.7	49.9	21.1	45	49.8	20.7	10	10	0	0	0.05	0.02	201	N/A
2024-03-05 20:15:58	00:00:31	Charge/CC	1.37	1.37	0	0	0	0	66.4	42.7	49.9	21.1	44.7	49.9	20.7	10	10	0	0	0.05	0.02	201	N/A
2024-03-05 20:15:59	00:00:32	Charge/CC	1.37	1.37	0.042	0.058	0.008	0.012	66.4	42.7	49.9	21.1	44.7	49.9	20.7	10	10	0	0	0.04	0.02	201	N/A
2024-03-05 20:16:00	00:00:33	Charge/CC	1.37	1.37	0	0	0	0	66.4	42.7	49.9	21.1	44.7	49.9	20.7	10	10	0	0	0.04	0.02	200	N/A
2024-03-05 20:16:01	00:00:34	Charge/CC	1.37	1.37	0	0	0	0	66.4	42.7	49.9	21.1	44.7	49.9	20.7	10	10	0	0	0.04	0.02	200	N/A
2024-03-05 20:16:02	00:00:35	Charge/CC	1.37	1.37	0	0	0	0	66.3	42.6	49.9	21.1	44.7	49.9	20.7	10	10	0	0	0.04	0.02	200	N/A
2024-03-05 20:16:03	00:00:36	Charge/CC	1.38	1.37	0	0	0	0	66.3	42.6	49.9	21.1	44.5	50	20.8	10	10	0	0	0.04	0.02	200	N/A
2024-03-05 20:16:04	00:00:37	Charge/CC	1.38	1.37	0	0	0	0	66.3	42.6	49.9	21.1	44.5	50	20.8	10	10	0.01	0	0.04	0.02	200	N/A
2024-03-05 20:16:05	00:00:38	Charge/CC	1.38	1.37	0	0	0	0	66.3	42.6	49.9	21.1	44.5	50	20.8	10	10	0.01	0	0.04	0.02	200	N/A
2024-03-05 20:16:06	00:00:39	Charge/CC	1.38	1.38	0	0	0	0	66.3	42.6	49.9	21.1	44.5	50	20.8	10	10	0.01	0	0.04	0.02	200	N/A
2024-03-05 20:16:07	00:00:40	Charge/CC	1.38	1.38	0.041	0.057	0.008	0.011	66.3	42.6	49.9	21.1	44.5	50	20.8	10	10	0.01	0	0.04	0.02	200	N/A
2024-03-05 20:16:08	00:00:41	Charge/CC	1.38	1.38	0.043	0.059	0.009	0.012	66.3	42.4	49.9	21.2	44.2	50	20.8	10	10	0.01	0	0.04	0.02	200	N/A
2024-03-05 20:16:09	00:00:42	Charge/CC	1.38	1.38	0.041	0.056	0.008	0.011	66.3	42.4	49.9	21.2	44.2	49.9	20.7	10	10	0.01	0	0.04	0.02	200	N/A
2024-03-05 20:16:10	00:00:43	Charge/CC	1.38	1.38	0.041	0.056	0.008	0.011	66.3	42.4	49.9	21.2	44.2	49.9	20.7	10	10	0	0	0.04	0.02	200	N/A
2024-03-05 20:16:11	00:00:44	Charge/CC	1.38	1.38	0	0	0	0	66.3	42.4	49.9	21.2	44.2	49.9	20.7	10	10	0	0	0.04	0.02	200	N/A
2024-03-05 20:16:12	00:00:45	Charge/CC	1.39	1.38	0.041	0.057	0.008	0.011	66.3	42.4	49.9	21.2	44.2	49.9	20.7	10	10	0	0	0.04	0.02	200	N/A
2024-03-05 20:16:13	00:00:46	Charge/CC	1.39	1.38	0.041	0.057	0.008	0.011	66.3	42.3	49.9	21.2	44.2	49.9	20.7	10	10	0	0	0.04	0.02	200	N/A
2024-03-05 20:16:14	00:00:47	Charge/CC	1.39	1.38	0.041	0.057	0.008	0.011	66.3	42.3	49.9	21.2	44	49.8	20.7	10	10	0	0	0.04	0.02	200	N/A
2024-03-05 20:16:15	00:00:48	Charge/CC	1.39	1.38	0.043	0.059	0.009	0.012	66.3	42.3	49.9	21.2	44	49.8	20.7	10	10	0.01	0	0.03	0.02	200	N/A
2024-03-05 20:16:16	00:00:49	Charge/CC	1.39	1.39	0.046	0.064	0.009	0.013	66.3	42.3	49.9	21.2	44	49.8	20.7	10	10	0.01	0	0.03	0.02	200	N/A
2024-03-05 20:16:17	00:00:50	Charge/CC	1.39	1.39	0	0	0	0	66.3	42.3	49.9	21.2	44	49.8	20.7	10	10	0.01	0	0.03	0.02	200	N/A
2024-03-05 20:16:18	00:00:51	Charge/CC	1.39	1.39	0	0	0	0	66.4	42.3	49.9	21.2	44	49.8	20.7	10	10	0.01	0	0.03	0.02	200	N/A
2024-03-05 20:16:19	00:00:52	Charge/CC	1.39	1.39	0.041	0.057	0.008	0.011	66.4	42.2	49.9	21.1	43.7	49.8	20.7	10	10	0.01	0	0.03	0.02	200	N/A
2024-03-05 20:16:20	00:00:53	Charge/CC	1.39	1.39	0.044	0.061	0.009	0.012	66.4	42.2	49.9	21.1	43.7	49.9	20.7	10	10	0.01	0	0.03	0.02	200	N/A
2024-03-05 20:16:21	00:00:54	Charge/CC	1.39	1.389	0.041	0.057	0.008	0.011	66.4	42.2	49.9	21.1	43.7	49.9	20.7	10	10	0.01	0	0.04	0.02	201	N/A
2024-03-05 20:16:22	00:00:55	Charge/CC	1.4	1.39	0	0	0	0	66.4	42.2	49.9	21.1	43.7	49.9	20.7	10	10	0.01	0	0.04	0.02	201	N/A
2024-03-05 20:16:23	00:00:56	Charge/CC	1.4	1.39	0	0	0	0	66.4	42.2	49.9	21.1	43.7	49.9	20.7	10	10	0.01	0	0.04	0.02	201	N/A
2024-03-05 20:16:24	00:00:57	Charge/CC	1.4	1.39	0	0	0	0	66.5	42.1	49.9	21.1	43.7	49.9	20.7	10	10	0.01	0	0.04	0.02	201	N/A
2024-03-05 20:16:25	00:00:58	Charge/CC	1.4	1.4	0.041	0.057	0.008	0.011	66.5	42.1	49.9	21.2	43.5	49.8	20.7	10	10	0.01	0	0.04	0.02	201	N/A
2024-03-05 20:16:26	00:00:59	Charge/CC	1.4	1.4	0.042	0.059	0.008	0.012	66.5	42.1	49.9	21.2	43.5	49.8	20.7	10	10	0.01	0	0.04	0.02	201	N/A
2024-03-05 20:16:27	00:01:00	Charge/CC	1.4	1.4	0.043	0.06	0.009	0.012	66.5	42.1	49.9	21.2	43.5	49.8	20.7	10	10	0.01	0	0.04	0.02	200	N/A
2024-03-05 20:16:28	00:01:01	Charge/CC	1.4	1.4	0	0	0	0	66.5	42.1	49.9	21.2	43.5	49.8	20.7	10	10	0.01	0	0.04	0.02	200	N/A
2024-03-05 20:16:29	00:01:02	Charge/CC	1.4	1.4	0.043	0.06	0.009	0.012	66.5	42.1	49.9	21.2	43.5	49.8	20.7	10	10	0.01	0	0.04	0.02	200	N/A
2024-03-05 20:16:30	00:01:03	Charge/CC	1.4	1.4	0.041	0.057	0.008	0.011	66.5	42.1	49.9	21.1	43.3	49.8	20.7	10	10	0.01	0	0.04	0.02	200	N/A
2024-03-05 20:16:31	00:01:04	Charge/CC	1.4	1.4	0.041	0.058	0.008	0.012	66.5	42.1	49.9	21.1	43.3	49.8	20.7	10	10	0.01	0	0.04	0.02	200	N/A
2024-03-05 20:16:32	00:01:05	Charge/CC	1.41	1.4	0	0	0	0	66.5	42.1	49.9	21.1	43.3	49.8	20.7	10	10	0.01	0	0.03	0.02	201	N/A
2024-03-05 20:16:33	00:01:06	Charge/CC	1.41	1.4	0	0	0	0	66.5	42.1	49.9	21.1	43.3	49.8	20.7	10	10	0.01	0	0.03	0.02	201	N/A
2024-03-05 20:16:34	00:01:07	Charge/CC	1.41	1.4	0	0	0	0	66.5	42.1	49.9	21.1	43.3	49.8	20.7	10	10	0.01	0	0.03	0.02	201	N/A
2024-03-05 20:16:35	00:01:08	Charge/CC	1.41	1.41	0.042	0.059	0.008	0.012	66.6	42.1	49.9	21.1	43.3	49.8	20.7	10	10	0.01	0	0.03	0.02	201	N/A
2024-03-05 20:16:36	00:01:09	Charge/CC	1.41	1.41	0.041	0.058	0.008	0.012	66.6	42.1	49.9	21.1	43.1	49.9	20.7	10	10	0.01	0	0.03	0.02	201	N/A
2024-03-05 20:16:37	00:01:10	Charge/CC	1.41	1.41	0.044	0.062	0.009	0.012	66.6	42.1	49.9	21.1	43.1	49.9	20.7	10	10	0.01	0	0.03	0.02	201	N/A
2024-03-05 20:16:38	00:01:11	Charge/CC	1.41	1.41	0.043	0.06	0.009	0.012	66.6	42.1	49.9	21.1	43.1	49.9	20.7	10	10	0.01	0	0.03	0.02	201	N/A
2024-03-05 20:16:39	00:01:12	Charge/CC	1.41	1.41	0.043	0.06	0.009	0.012	66.6	42.1	49.9	21.1	43.1	49.9	20.7	10	10	0.01	0	0.03	0.02	201	N/A
2024-03-05 20:16:40	00:01:13	Charge/CC	1.41	1.41	0	0	0	0	66.7	42.2	49.9	21.1	43.1	49.9	20.7	10	10	0.01	0	0.03	0.02	201	N/A
2024-03-05 20:16:41	00:01:14	Charge/CC	1.41	1.41	0.043	0.06	0.009	0.012	66.7	42.2	50	21.1	42.9	49.9	20.7	10	10	0.01	0	0.03	0.02	201	N/A
2024-03-05 20:16:42	00:01:15	Charge/CC	1.42	1.41	0.042	0.059	0.008	0.012	66.7	42.2	50	21.1	42.9	49.9	20.7	10	10	0.01	0	0.03	0.02	201	N/A
2024-03-05 20:16:43	00:01:16	Charge/CC	1.42	1.41	0.042	0.059	0.008	0.012	66.7	42.2	50	21.1	42.9	49.9	20.7	10	10	0.01	0	0.02	0.02	201	N/A
2024-03-05 20:16:44	00:01:17	Charge/CC	1.42	1.41	0.042	0.059	0.008	0.012	66.7	42.2	50	21.1	42.9	49.9	20.7	10	10	0.01	0	0.02	0.02	201	N/A
2024-03-05 20:16:45	00:01:18	Charge/CC	1.42	1.42	0.045	0.064	0.009	0.013	66.7	42.2	50	21.1	42.9	49.9	20.7	10	10	0.01	0	0.02	0.02	201	N/A
2024-03-05 20:16:46	00:01:19	Charge/CC	1.42	1.42	0.045	0.064	0.009	0.013	66.8	42.3	50.1	21.1	42.9	49.9	20.7	10	10	0.01	0	0.02	0.02	201	N/A
2024-03-05 20:16:47	00:01:20	Charge/CC	1.42	1.42	0.044	0.063	0.009	0.013	66.8	42.3	50.1	21.1	42.7	49.9	20.7	10	10	0.01	0	0.02	0.02	201	N/A
2024-03-05 20:16:48	00:01:21	Charge/CC	1.42	1.42	0.044	0.062	0.009	0.012	66.8	42.3	50.1	21.1	42.7	49.9	20.7	10	10	0.01	0	0.02	0.02	201	N/A
2024-03-05 20:16:49	00:01:22	Charge/CC	1.42	1.42	0.044	0.062	0.009	0.012	66.8	42.3	50.1	21.1	42.7	49.9	20.7	10	10	0.01	0	0.02	0.02	201	N/A
2024-03-05 20:16:50	00:01:23	Charge/CC	1.42	1.42	0.046	0.065	0.009	0.013	66.8	42.3	50.1	21.1	42.7	49.9	20.7	10	10	0.01	0	0.02	0.02	201	N/A
2024-03-05 20:16:51	00:01:24	Charge/CC	1.42	1.42	0.043	0.061	0.009	0.012	67	42.5	50.1	21.1	42.7	49.9	20.7	10	10	0.01	0	0.02	0.02	201	N/A
2024-03-05 20:16:52	00:01:25	Charge/CC	1.43	1.42	0.042	0.06	0.008	0.012	67	42.5	50	21.1	42.5	49.8	20.7	10	10	0.01	0	0.02	0.02	201	N/A
2024-03-05 20:16:53	00:01:26	Charge/CC	1.43	1.42	0.042	0.06	0.008	0.012	67	42.5	50	21.1	42.5	49.8	20.7	10	10	0	0	0.02	0.02	201	N/A
2024-03-05 20:16:54	00:01:27	Charge/CC	1.43	1.42	0.042	0.06	0.008	0.012	67	42.5	50	21.1	42.5	49.8	20.7	10	10	0	0	0.02	0.02	201	N/A
2024-03-05 20:16:55	00:01:28	Charge/CC	1.43	1.43	0.095	0.136	0.019	0.027	67	42.5	50	21.1	42.5	49.8	20.7	10	10	0	0	0.02	0.02	201	N/A
2024-03-05 20:16:56	00:01:29	Charge/CC	1.43	1.43	0.096	0.137	0.019	0.027	67	42.5	50	21.1	42.5	49.8	20.7	10	10	0	0	0.02	0.02	201	N/A
2024-03-05 20:16:57	00:01:30	Charge/CC	1.43	1.43	0.091	0.131	0.018	0.026	67.1	42.7	49.9	21.1	42.3	49.8	20.7	10	10	0	0	0.02	0.02	201	N/A
2024-03-05 20:16:58	00:01:31	Charge/CC	1.43	1.43	0.094	0.135	0.019	0.027	67.1	42.7	49.9	21.1	42.3	50	20.7	10	10	0	0	0.02	0.02	201	N/A
2024-03-05 20:16:59	00:01:32	Charge/CC	1.43	1.43	0.091	0.13	0.018	0.026	67.1	42.7	49.9	21.1	42.3	50	20.7	10	10	0	0	0.02	0.02	201	N/A
2024-03-05 20:17:00	00:01:33	Charge/CC	1.43	1.43	0.049	0.07	0.01	0.014	67.1	42.7	49.9	21.1	42.3	50	20.7	10	10	0	0	0.02	0.02	201	N/A
2024-03-05 20:17:01	00:01:34	Charge/CC	1.43	1.43	0.048	0.068	0.01	0.014	67.1	42.7	49.9	21.1	42.3	50	20.7	10	10	0	0	0.02	0.02	201	N/A
2024-03-05 20:17:02	00:01:35	Charge/CC	1.44	1.43	0.094	0.134	0.019	0.027	67.2	42.9	50	21.1	42.3	50	20.7	10	10	0	0	0.02	0.02	201	N/A
2024-03-05 20:17:03	00:01:36	Charge/CC	1.44	1.43	0.094	0.134	0.019	0.027	67.2	42.9	50	21.2	42.2	49.9	20.7	10	10	0	0	0.02	0.02	201	N/A
2024-03-05 20:17:04	00:01:37	Charge/CC	1.44	1.43	0.094	0.134	0.019	0.027	67.2	42.9	50	21.2	42.2	49.9	20.7	10	10	0	0	0.02	0.02	201	N/A
2024-03-05 20:17:05	00:01:38	Charge/CC	1.44	1.44	0.122	0.175	0.024	0.035	67.2	42.9	50	21.2	42.2	49.9	20.7	10	10	0	0	0.02	0.02	201	N/A
2024-03-05 20:17:06	00:01:39	Charge/CC	1.44	1.44	0.12	0.173	0.024	0.035	67.2	42.9	50	21.2	42.2	49.9	20.7	10	10	0	0	0.02	0.02	201	N/A
2024-03-05 20:17:07	00:01:40	Charge/CC	1.44	1.44	0.124	0.178	0.025	0.036	67.3	42.9	50	21.2	42.2	49.9	20.7	10	10	0	0	0.02	0.02	201	N/A
2024-03-05 20:17:08	00:01:41	Charge/CC	1.44	1.44	0.124	0.178	0.025	0.036	67.3	43.2	50	21.2	42.2	49.9	20.7	10	10	0	0	0.02	0.02	201	N/A
2024-03-05 20:17:09	00:01:42	Charge/CC	1.44	1.44	0.122	0.176	0.024	0.035	67.3	43.2	50	21.2	42.2	50	20.7	10	10	0	0	0.02	0.02	201	N/A
2024-03-05 20:17:10	00:01:43	Charge/CC	1.44	1.44	0.119	0.171	0.024	0.034	67.3	43.2	50	21.2	42.2	50	20.7	10	10	0	0	0.02	0.02	201	N/A
2024-03-05 20:17:11	00:01:44	Charge/CC	1.44	1.44	0.119	0.172	0.024	0.034	67.3	43.2	50	21.2	42.2	50	20.7	10	10	0	0	0.02	0.02	201	N/A
2024-03-05 20:17:12	00:01:45	Charge/CC	1.45	1.44	0.121	0.174	0.024	0.035	67.3	43.2	50	21.2	42.2	50	20.7	10	10	0	0	0.02	0.02	201	N/A
2024-03-05 20:17:13	00:01:46	Charge/CC	1.45	1.44	0.121	0.174	0.024	0.035	67.5	43.4	50	21.2	42.2	50	20.7	10	10	0	0	0.02	0.02	201	N/A
2024-03-05 20:17:14	00:01:47	Charge/CC	1.45	1.44	0.121	0.174	0.024	0.035	67.5	43.4	50	21.2	42.1	49.8	20.7	10	10	0	0	0.02	0.02	201	N/A
2024-03-05 20:17:15	00:01:48	Charge/CC	1.45	1.45	0.152	0.22	0.03	0.044	67.5	43.4	50	21.2	42.1	49.8	20.7	10	10	0	0	0.03	0.02	201	N/A
2024-03-05 20:17:16	00:01:49	Charge/CC	1.45	1.45	0.15	0.218	0.03	0.044	67.5	43.4	50	21.2	42.1	49.8	20.7	10	10	0	0	0.03	0.02	201	N/A
2024-03-05 20:17:17	00:01:50	Charge/CC	1.45	1.45	0.153	0.222	0.031	0.044	67.5	43.4	50	21.2	42.1	49.8	20.7	10	10	0	0	0.03	0.02	201	N/A
2024-03-05 20:17:18	00:01:51	Charge/CC	1.45	1.45	0.15	0.218	0.03	0.044	67.7	43.4	50	21.2	42.1	49.8	20.7	10	10	0	0	0.03	0.02	201	N/A
2024-03-05 20:17:19	00:01:52	Charge/CC	1.45	1.45	0.154	0.223	0.031	0.045	67.7	43.7	49.9	21.2	42.1	49.8	20.7	10	10	0	0	0.03	0.02	201	N/A
2024-03-05 20:17:20	00:01:53	Charge/CC	1.45	1.45	0.151	0.219	0.03	0.044	67.7	43.7	49.9	21.2	42.1	49.8	20.7	10	10	0	0	0.03	0.02	201	N/A
2024-03-05 20:17:21	00:01:54	Charge/CC	1.45	1.45	0.149	0.217	0.03	0.043	67.7	43.7	49.9	21.2	42.1	49.8	20.7	10	10	0	0	0.02	0.02	201	N/A
2024-03-05 20:17:22	00:01:55	Charge/CC	1.46	1.45	0.15	0.218	0.03	0.044	67.7	43.7	49.9	21.2	42.1	49.8	20.7	10	10	0	0	0.02	0.02	201	N/A
2024-03-05 20:17:23	00:01:56	Charge/CC	1.46	1.45	0.15	0.218	0.03	0.044	67.7	43.7	49.9	21.2	42.1	49.8	20.7	10	10	0	0	0.02	0.02	201	N/A
2024-03-05 20:17:24	00:01:57	Charge/CC	1.46	1.45	0.15	0.218	0.03	0.044	67.9	43.9	50	21.2	42.1	49.8	20.7	10	10	0	0	0.02	0.02	201	N/A
2024-03-05 20:17:25	00:01:58	Charge/CC	1.46	1.46	0.201	0.293	0.04	0.059	67.9	43.9	50	21.2	42.2	49.9	20.7	10	10	0	0	0.02	0.02	201	N/A
2024-03-05 20:17:26	00:01:59	Charge/CC	1.46	1.46	0.2	0.292	0.04	0.058	67.9	43.9	50	21.2	42.2	49.9	20.7	10	10	0	0	0.02	0.02	201	N/A
2024-03-05 20:17:27	00:02:00	Charge/CC	1.46	1.46	0.204	0.298	0.041	0.06	67.9	43.9	50	21.2	42.2	49.9	20.7	10	10	0	0	0.02	0.02	201	N/A
2024-03-05 20:17:28	00:02:01	Charge/CC	1.46	1.46	0.202	0.296	0.04	0.059	67.9	43.9	50	21.2	42.2	49.9	20.7	10	10	0	0	0.02	0.02	201	N/A
2024-03-05 20:17:29	00:02:02	Charge/CC	1.46	1.46	0.202	0.295	0.04	0.059	68.1	44.2	50	21.2	42.2	49.9	20.7	10	10	0	0	0.02	0.02	201	N/A
2024-03-05 20:17:30	00:02:03	Charge/CC	1.46	1.46	0.2	0.291	0.04	0.058	68.1	44.2	50	21.2	42.2	49.8	20.7	10	10	0	0	0.02	0.02	201	N/A
2024-03-05 20:17:31	00:02:04	Charge/CC	1.46	1.46	0.2	0.291	0.04	0.058	68.1	44.2	50	21.2	42.2	49.8	20.7	10	10	0	0	0.02	0.02	201	N/A
2024-03-05 20:17:32	00:02:05	Charge/CC	1.47	1.46	0.2	0.291	0.04	0.058	68.1	44.2	50	21.2	42.2	49.8	20.7	10	10	0	0	0.03	0.02	201	N/A
2024-03-05 20:17:33	00:02:06	Charge/CC	1.47	1.46	0.2	0.291	0.04	0.058	68.1	44.2	50	21.2	42.2	49.8	20.7	10	10	0	0	0.03	0.02	201	N/A
2024-03-05 20:17:34	00:02:07	Charge/CC	1.47	1.46	0.2	0.291	0.04	0.058	68.1	44.2	50	21.2	42.2	49.8	20.7	10	10	0	0	0.03	0.02	201	N/A
2024-03-05 20:17:35	00:02:08	Charge/CC	1.47	1.47	0.273	0.402	0.055	0.08	68.3	44.4	50	21.2	42.2	49.8	20.7	10	10	0	0	0.03	0.02	201	N/A
2024-03-05 20:17:36	00:02:09	Charge/CC	1.47	1.47	0.273	0.401	0.055	0.08	68.3	44.4	50	21.2	42.3	49.9	20.7	10	10	0	0	0.03	0.02	201	N/A
2024-03-05 20:17:37	00:02:10	Charge/CC	1.47	1.469	0.274	0.403	0.055	0.081	68.3	44.4	50	21.2	42.3	49.9	20.7	10	10	0	0	0.03	0.02	201	N/A
2024-03-05 20:17:38	00:02:11	Charge/CC	1.47	1.47	0.276	0.406	0.055	0.081	68.3	44.4	50	21.2	42.3	49.9	20.7	10	10	0	0	0.03	0.02	201	N/A
2024-03-05 20:17:39	00:02:12	Charge/CC	1.47	1.47	0.273	0.401	0.055	0.08	68.3	44.4	50	21.2	42.3	49.9	20.7	10	10	0	0	0.03	0.02	201	N/A
2024-03-05 20:17:40	00:02:13	Charge/CC	1.47	1.47	0.273	0.402	0.055	0.08	68.5	44.7	50	21.2	42.3	49.9	20.7	10	10	0	0	0.03	0.02	201	N/A
2024-03-05 20:17:41	00:02:14	Charge/CC	1.47	1.47	0.276	0.405	0.055	0.081	68.5	44.7	50.1	21.2	42.4	49.9	20.7	10	10	0	0	0.03	0.02	201	N/A
2024-03-05 20:17:42	00:02:15	Charge/CC	1.48	1.47	0.274	0.403	0.055	0.081	68.5	44.7	50.1	21.2	42.4	49.9	20.7	10	10	0	0	0.03	0.02	201	N/A
2024-03-05 20:17:43	00:02:16	Charge/CC	1.48	1.47	0.274	0.403	0.055	0.081	68.5	44.7	50.1	21.2	42.4	49.9	20.7	10	10	0	0	0.03	0.02	201	N/A
2024-03-05 20:17:44	00:02:17	Charge/CC	1.48	1.47	0.274	0.403	0.055	0.081	68.5	44.7	50.1	21.2	42.4	49.9	20.7	10	10	0	0	0.03	0.02	201	N/A
2024-03-05 20:17:45	00:02:18	Charge/CC	1.48	1.48	0.369	0.546	0.074	0.109	68.5	44.7	50.1	21.2	42.4	49.9	20.7	10	10	0	0	0.03	0.02	201	N/A
2024-03-05 20:17:46	00:02:19	Charge/CC	1.48	1.48	0.369	0.547	0.074	0.109	68.7	44.9	50	21.2	42.5	49.9	20.7	10	10	0	0	0.03	0.02	201	N/A
2024-03-05 20:17:47	00:02:20	Charge/CC	1.48	1.48	0.368	0.545	0.074	0.109	68.7	44.9	50	21.2	42.5	49.9	20.7	10	10	0	0	0.03	0.02	201	N/A
2024-03-05 20:17:48	00:02:21	Charge/CC	1.48	1.48	0.367	0.543	0.073	0.109	68.7	44.9	50	21.2	42.5	49.9	20.7	10	10	0	0	0.03	0.02	201	N/A
2024-03-05 20:17:49	00:02:22	Charge/CC	1.48	1.48	0.365	0.54	0.073	0.108	68.7	44.9	50	21.2	42.5	49.9	20.7	10	10	0	0	0.03	0.02	201	N/A
2024-03-05 20:17:50	00:02:23	Charge/CC	1.48	1.48	0.366	0.541	0.073	0.108	68.7	44.9	50	21.2	42.5	49.9	20.7	10	10	0	0	0.03	0.02	201	N/A
2024-03-05 20:17:51	00:02:24	Charge/CC	1.48	1.48	0.367	0.542	0.073	0.108	68.8	45.1	50.1	21.2	42.5	49.9	20.7	10	10	0	0	0.03	0.02	201	N/A
2024-03-05 20:17:52	00:02:25	Charge/CC	1.49	1.48	0.367	0.544	0.073	0.109	68.8	45.1	50.1	21.2	42.7	49.9	20.7	10	10	0	0	0.03	0.02	201	N/A
2024-03-05 20:17:53	00:02:26	Charge/CC	1.49	1.48	0.367	0.544	0.073	0.109	68.8	45.1	50.1	21.2	42.7	49.9	20.7	10	10	0	0	0.03	0.02	201	N/A
2024-03-05 20:17:54	00:02:27	Charge/CC	1.49	1.48	0.367	0.544	0.073	0.109	68.8	45.1	50.1	21.2	42.7	49.9	20.7	10	10	0	0	0.03	0.02	201	N/A
2024-03-05 20:17:55	00:02:28	Charge/CC	1.49	1.49	0.483	0.719	0.097	0.144	68.8	45.1	50.1	21.2	42.7	49.9	20.7	10	10	0	0	0.03	0.02	201	N/A
2024-03-05 20:17:56	00:02:29	Charge/CC	1.49	1.49	0.481	0.717	0.096	0.143	69	45.1	50.1	21.2	42.7	49.9	20.7	10	10	0	0	0.03	0.02	201	N/A
2024-03-05 20:17:57	00:02:30	Charge/CC	1.49	1.49	0.488	0.726	0.098	0.145	69	45.3	50	21.2	42.9	49.9	20.7	10	10	0	0	0.03	0.02	201	N/A
2024-03-05 20:17:58	00:02:31	Charge/CC	1.49	1.49	0.485	0.723	0.097	0.145	69	45.3	50	21.2	42.9	49.9	20.7	10	10	0	0	0.03	0.02	201	N/A
2024-03-05 20:17:59	00:02:32	Charge/CC	1.49	1.49	0.484	0.721	0.097	0.144	69	45.3	50	21.2	42.9	49.9	20.7	10	10	0	0	0.04	0.02	201	N/A
2024-03-05 20:18:00	00:02:33	Charge/CC	1.49	1.489	0.484	0.721	0.097	0.144	69	45.3	50	21.2	42.9	49.9	20.7	10	10	0	0	0.04	0.02	201	N/A
2024-03-05 20:18:01	00:02:34	Charge/CC	1.49	1.49	0.485	0.722	0.097	0.144	69	45.3	50	21.2	42.9	49.9	20.7	10	10	0	0	0.04	0.02	201	N/A
2024-03-05 20:18:02	00:02:35	Charge/CC	1.5	1.49	0.485	0.722	0.097	0.144	69.1	45.6	50	21.2	42.9	49.9	20.7	10	10	0	0	0.04	0.02	201	N/A
2024-03-05 20:18:03	00:02:36	Charge/CC	1.5	1.49	0.485	0.722	0.097	0.144	69.1	45.6	50	21.1	43.1	49.9	20.7	10	10	0	0	0.04	0.02	201	N/A
2024-03-05 20:18:04	00:02:37	Charge/CC	1.5	1.49	0.485	0.722	0.097	0.144	69.1	45.6	50	21.1	43.1	49.9	20.7	10	10	0	0	0.04	0.02	201	N/A
2024-03-05 20:18:05	00:02:38	Charge/CC	1.5	1.5	0.628	0.942	0.126	0.188	69.1	45.6	50	21.1	43.1	49.9	20.7	10	10	0	0	0.04	0.02	201	N/A
2024-03-05 20:18:06	00:02:39	Charge/CC	1.5	1.5	0.627	0.941	0.125	0.188	69.1	45.6	50	21.1	43.1	49.9	20.7	10	10	0	0	0.04	0.02	201	N/A
2024-03-05 20:18:07	00:02:40	Charge/CC	1.5	1.5	0.627	0.941	0.125	0.188	69.3	45.6	50	21.1	43.1	49.9	20.7	10	10	0	0	0.04	0.02	201	N/A
2024-03-05 20:18:08	00:02:41	Charge/CC	1.5	1.5	0.629	0.943	0.126	0.189	69.3	45.8	50	21.2	43.3	49.8	20.7	10	10	0	0	0.04	0.02	201	N/A
2024-03-05 20:18:09	00:02:42	Charge/CC	1.5	1.5	0.624	0.936	0.125	0.187	69.3	45.8	50	21.2	43.3	49.8	20.7	10	10	0	0	0.04	0.02	201	N/A
2024-03-05 20:18:10	00:02:43	Charge/CC	1.5	1.5	0.624	0.937	0.125	0.187	69.3	45.8	50	21.2	43.3	49.8	20.7	10	10	0	0	0.04	0.02	201	N/A
2024-03-05 20:18:11	00:02:44	Charge/CC	1.5	1.5	0.629	0.943	0.126	0.189	69.3	45.8	50	21.2	43.3	49.8	20.7	10	10	0	0	0.04	0.02	201	N/A
2024-03-05 20:18:12	00:02:45	Charge/CC	1.51	1.5	0.625	0.938	0.125	0.188	69.3	45.8	50	21.2	43.3	49.8	20.7	10	10	0	0	0.04	0.02	201	N/A
2024-03-05 20:18:13	00:02:46	Charge/CC	1.51	1.5	0.625	0.938	0.125	0.188	69.5	46	50	21	43.3	49.8	20.7	10	10	0	0	0.04	0.02	201	N/A
2024-03-05 20:18:14	00:02:47	Charge/CC	1.51	1.5	0.625	0.938	0.125	0.188	69.5	46	50	21	43.5	49.9	20.7	10	10	0	0	0.04	0.02	201	N/A
2024-03-05 20:18:15	00:02:48	Charge/CC	1.51	1.5	0.627	0.94	0.125	0.188	69.5	46	50	21	43.5	49.9	20.7	10	10	0	0	0.05	0.02	201	N/A
2024-03-05 20:18:16	00:02:49	Charge/CC	1.51	1.51	0.796	1.203	0.159	0.241	69.5	46	50	21	43.5	49.9	20.7	10	10	0	0	0.05	0.02	201	N/A
2024-03-05 20:18:17	00:02:50	Charge/CC	1.51	1.51	0.793	1.197	0.159	0.239	69.5	46	50	21	43.5	49.9	20.7	10	10	0	0	0.05	0.02	201	N/A
2024-03-05 20:18:18	00:02:51	Charge/CC	1.51	1.51	0.792	1.196	0.158	0.239	69.7	46.2	50	21	43.5	49.9	20.7	10	10	0	0	0.05	0.02	201	N/A
2024-03-05 20:18:19	00:02:52	Charge/CC	1.51	1.51	0.792	1.196	0.158	0.239	69.7	46.2	50	21	43.7	49.9	20.7	10	10	0	0	0.05	0.02	201	N/A
2024-03-05 20:18:20	00:02:53	Charge/CC	1.51	1.51	0.787	1.189	0.157	0.238	69.7	46.2	50	21	43.7	49.9	20.7	10	10	0	0	0.05	0.02	201	N/A
2024-03-05 20:18:21	00:02:54	Charge/CC	1.51	1.51	0.788	1.19	0.158	0.238	69.7	46.2	50	21	43.7	49.9	20.7	10	10	0	0	0.05	0.02	201	N/A
2024-03-05 20:18:22	00:02:55	Charge/CC	1.52	1.51	0.789	1.192	0.158	0.238	69.7	46.2	50	21	43.7	49.9	20.7	10	10	0	0	0.05	0.02	201	N/A
2024-03-05 20:18:23	00:02:56	Charge/CC	1.52	1.51	0.789	1.192	0.158	0.238	69.7	46.2	50	21	43.7	49.9	20.7	10	10	0	0	0.05	0.02	201	N/A
2024-03-05 20:18:24	00:02:57	Charge/CC	1.52	1.51	0.789	1.192	0.158	0.238	69.8	46.4	50	21.1	43.7	49.9	20.7	10	10	0	0	0.05	0.02	201	N/A
2024-03-05 20:18:25	00:02:58	Charge/CC	1.52	1.52	0.988	1.502	0.198	0.3	69.8	46.4	50	21.1	43.9	49.9	20.7	10	10	0	0	0.05	0.02	201	N/A
2024-03-05 20:18:26	00:02:59	Charge/CC	1.52	1.52	0.987	1.5	0.197	0.3	69.8	46.4	50	21.1	43.9	49.9	20.7	10	10	0	0	0.05	0.02	201	N/A
2024-03-05 20:18:27	00:03:00	Charge/CC	1.52	1.52	0.981	1.491	0.196	0.298	69.8	46.4	50	21.1	43.9	49.9	20.7	10	10	0	0	0.05	0.02	201	N/A
2024-03-05 20:18:28	00:03:01	Charge/CC	1.52	1.52	0.982	1.493	0.196	0.299	69.8	46.4	50	21.1	43.9	49.9	20.7	10	10	0	0	0.05	0.02	201	N/A
2024-03-05 20:18:29	00:03:02	Charge/CC	1.52	1.52	0.981	1.491	0.196	0.298	70	46.7	50	21.1	43.9	49.9	20.7	10	10	0	0	0.05	0.02	201	N/A
2024-03-05 20:18:30	00:03:03	Charge/CC	1.52	1.52	0.977	1.485	0.195	0.297	70	46.7	50	21.1	44.1	49.9	20.7	10	10	0	0	0.05	0.02	201	N/A
2024-03-05 20:18:31	00:03:04	Charge/CC	1.52	1.52	0.98	1.49	0.196	0.298	70	46.7	50	21.1	44.1	49.9	20.7	10	10	0	0	0.05	0.02	201	N/A
2024-03-05 20:18:32	00:03:05	Charge/CC	1.53	1.52	0.981	1.492	0.196	0.298	70	46.7	50	21.1	44.1	49.9	20.7	10	10	0	0	0.05	0.02	201	N/A
2024-03-05 20:18:33	00:03:06	Charge/CC	1.53	1.52	0.981	1.492	0.196	0.298	70	46.7	50	21.1	44.1	49.9	20.7	10	10	0	0	0.05	0.02	201	N/A
2024-03-05 20:18:34	00:03:07	Charge/CC	1.53	1.52	0.981	1.492	0.196	0.298	70	46.7	50	21.1	44.1	49.9	20.7	10	10	0	0	0.05	0.02	201	N/A
2024-03-05 20:18:35	00:03:08	Charge/CC	1.53	1.52	0.981	1.49	0.196	0.298	70	46.9	50.1	21.1	44.3	49.9	20.7	10	10	0	0	0.05	0.02	201	N/A
2024-03-05 20:18:36	00:03:09	Charge/CC	1.53	1.53	1.211	1.853	0.242	0.371	70	46.9	50.1	21.1	44.3	49.9	20.7	10	10	0	0	0.05	0.02	201	N/A
2024-03-05 20:18:37	00:03:10	Charge/CC	1.53	1.53	1.206	1.844	0.241	0.369	70	46.9	50.1	21.1	44.3	49.9	20.7	10	10	0	0	0.06	0.02	201	N/A
2024-03-05 20:18:38	00:03:11	Charge/CC	1.53	1.53	1.208	1.848	0.242	0.37	70	46.9	50.1	21.1	44.3	49.9	20.7	10	10	0	0	0.06	0.02	201	N/A
2024-03-05 20:18:39	00:03:12	Charge/CC	1.53	1.53	1.207	1.847	0.241	0.369	70	46.9	50.1	21.1	44.3	49.9	20.7	10	10	0	0	0.06	0.02	201	N/A
2024-03-05 20:18:40	00:03:13	Charge/CC	1.53	1.53	1.203	1.84	0.241	0.368	70.1	47.1	50.1	21.1	44.3	49.9	20.7	10	10	0	0	0.06	0.02	201	N/A
2024-03-05 20:18:41	00:03:14	Charge/CC	1.53	1.53	1.206	1.844	0.241	0.369	70.1	47.1	50.1	21	44.5	49.9	20.7	10	10	0	0	0.06	0.02	201	N/A
2024-03-05 20:18:42	00:03:15	Charge/CC	1.54	1.53	1.211	1.852	0.242	0.37	70.1	47.1	50.1	21	44.5	49.9	20.7	10	10	0	0	0.06	0.02	201	N/A
2024-03-05 20:18:43	00:03:16	Charge/CC	1.54	1.53	1.211	1.852	0.242	0.37	70.1	47.1	50.1	21	44.5	49.9	20.7	10	10	0	0	0.06	0.02	201	N/A
2024-03-05 20:18:44	00:03:17	Charge/CC	1.54	1.53	1.211	1.852	0.242	0.37	70.1	47.1	50.1	21	44.5	49.9	20.7	10	10	0	0	0.06	0.02	201	N/A
2024-03-05 20:18:45	00:03:18	Charge/CC	1.54	1.54	1.49	2.295	0.298	0.459	70.3	47.1	50.1	21	44.5	49.9	20.7	10	10	0	0	0.06	0.02	201	N/A
2024-03-05 20:18:46	00:03:19	Charge/CC	1.54	1.54	1.484	2.285	0.297	0.457	70.3	47.3	50	21.1	44.8	49.9	20.7	10	10	0	0	0.06	0.02	201	N/A
2024-03-05 20:18:47	00:03:20	Charge/CC	1.54	1.54	1.474	2.27	0.295	0.454	70.3	47.3	50	21.1	44.8	50	20.7	10	10	0.01	0	0.06	0.02	201	N/A
2024-03-05 20:18:48	00:03:21	Charge/CC	1.54	1.54	1.48	2.28	0.296	0.456	70.3	47.3	50	21.1	44.8	50	20.7	10	10	0.01	0	0.07	0.02	201	N/A
2024-03-05 20:18:49	00:03:22	Charge/CC	1.54	1.54	1.485	2.287	0.297	0.457	70.3	47.3	50	21.1	44.8	50	20.7	10	10	0.01	0	0.07	0.02	201	N/A
2024-03-05 20:18:50	00:03:23	Charge/CC	1.54	1.54	1.482	2.283	0.296	0.457	70.3	47.3	50	21.1	44.8	50	20.7	10	10	0.01	0	0.07	0.02	201	N/A
2024-03-05 20:18:51	00:03:24	Charge/CC	1.54	1.54	1.481	2.28	0.296	0.456	70.4	47.5	50	21.1	44.8	50	20.7	10	10	0.01	0	0.07	0.02	201	N/A
2024-03-05 20:18:52	00:03:25	Charge/CC	1.55	1.54	1.486	2.288	0.297	0.458	70.4	47.5	50	21.1	45	50	20.7	10	10	0.01	0	0.07	0.02	201	N/A
2024-03-05 20:18:53	00:03:26	Charge/CC	1.55	1.54	1.486	2.288	0.297	0.458	70.4	47.5	50	21.1	45	50	20.7	10	10	0.01	0	0.08	0.02	201	N/A
2024-03-05 20:18:54	00:03:27	Charge/CC	1.55	1.54	1.486	2.288	0.297	0.458	70.4	47.5	50	21.1	45	50	20.7	10	10	0.01	0	0.08	0.02	201	N/A
2024-03-05 20:18:55	00:03:28	Charge/CC	1.55	1.54	1.481	2.281	0.296	0.456	70.4	47.5	50	21.1	45	50	20.7	10	10	0.01	0	0.08	0.02	201	N/A
2024-03-05 20:18:56	00:03:29	Charge/CC	1.55	1.55	1.803	2.795	0.361	0.559	70.5	47.5	50	21.1	45	50	20.7	10	10	0.01	0	0.08	0.02	201	N/A
2024-03-05 20:18:57	00:03:30	Charge/CC	1.55	1.55	1.791	2.776	0.358	0.555	70.5	47.7	50.1	21.1	45.2	50	20.7	10	10	0.01	0	0.08	0.02	201	N/A
2024-03-05 20:18:58	00:03:31	Charge/CC	1.55	1.55	1.794	2.782	0.359	0.556	70.5	47.7	50.1	21.1	45.2	50	20.7	10	10	0.01	0	0.08	0.02	201	N/A
2024-03-05 20:18:59	00:03:32	Charge/CC	1.55	1.55	1.799	2.788	0.36	0.558	70.5	47.7	50.1	21.1	45.2	50	20.7	10	10	0.01	0	0.09	0.02	200	N/A
2024-03-05 20:19:00	00:03:33	Charge/CC	1.55	1.55	1.786	2.768	0.357	0.554	70.5	47.7	50.1	21.1	45.2	50	20.7	10	10	0.01	0	0.09	0.02	200	N/A
2024-03-05 20:19:01	00:03:34	Charge/CC	1.55	1.55	1.777	2.755	0.355	0.551	70.5	47.7	50.1	21.1	45.2	50	20.7	10	10	0.01	0	0.09	0.02	200	N/A
2024-03-05 20:19:02	00:03:35	Charge/CC	1.56	1.55	1.786	2.768	0.357	0.554	70.6	47.9	50.1	21	45.2	50	20.7	10	10	0.01	0	0.09	0.02	200	N/A
2024-03-05 20:19:03	00:03:36	Charge/CC	1.56	1.55	1.786	2.768	0.357	0.554	70.6	47.9	50.1	21	45.4	50	20.7	10	10	0.01	0	0.09	0.02	200	N/A
2024-03-05 20:19:04	00:03:37	Charge/CC	1.56	1.55	1.786	2.768	0.357	0.554	70.6	47.9	50.1	21	45.4	50	20.7	10	10	0.01	0	0.1	0.02	200	N/A
2024-03-05 20:19:05	00:03:38	Charge/CC	1.56	1.56	2.168	3.382	0.434	0.676	70.6	47.9	50.1	21	45.4	50	20.7	10	10	0.01	0	0.1	0.02	200	N/A
2024-03-05 20:19:06	00:03:39	Charge/CC	1.56	1.56	2.163	3.374	0.433	0.675	70.6	47.9	50.1	21	45.4	50	20.7	10	10	0.01	0	0.1	0.02	200	N/A
2024-03-05 20:19:07	00:03:40	Charge/CC	1.56	1.56	2.141	3.341	0.428	0.668	70.6	48.1	50.1	21	45.4	50	20.7	10	10	0.01	0	0.1	0.02	200	N/A
2024-03-05 20:19:08	00:03:41	Charge/CC	1.56	1.56	2.143	3.342	0.429	0.668	70.6	48.1	50.1	21.1	45.6	50	20.7	10	10	0.01	0	0.1	0.02	200	N/A
2024-03-05 20:19:09	00:03:42	Charge/CC	1.56	1.56	2.14	3.339	0.428	0.668	70.6	48.1	50.1	21.1	45.6	50	20.7	10	10	0.02	0	0.1	0.02	200	N/A
2024-03-05 20:19:10	00:03:43	Charge/CC	1.56	1.56	2.137	3.334	0.427	0.667	70.6	48.1	50.1	21.1	45.6	50	20.7	10	10	0.02	0	0.1	0.02	201	N/A
2024-03-05 20:19:11	00:03:44	Charge/CC	1.56	1.56	2.137	3.334	0.427	0.667	70.6	48.1	50.1	21.1	45.6	50	20.7	10	10	0.02	0	0.1	0.02	201	N/A
2024-03-05 20:19:12	00:03:45	Charge/CC	1.57	1.56	2.141	3.34	0.428	0.668	70.6	48.1	50.1	21.1	45.6	50	20.7	10	10	0.02	0	0.1	0.02	201	N/A
2024-03-05 20:19:13	00:03:46	Charge/CC	1.57	1.56	2.141	3.34	0.428	0.668	70.7	48.3	50	21.1	45.6	50	20.7	10	10	0.02	0	0.1	0.02	201	N/A
2024-03-05 20:19:14	00:03:47	Charge/CC	1.57	1.56	2.141	3.34	0.428	0.668	70.7	48.3	50	21.1	45.8	50	20.7	10	10	0.02	0	0.1	0.02	201	N/A
2024-03-05 20:19:15	00:03:48	Charge/CC	1.57	1.57	2.582	4.053	0.516	0.811	70.7	48.3	50	21.1	45.8	50	20.7	10	10	0.02	0	0.1	0.02	201	N/A
2024-03-05 20:19:16	00:03:49	Charge/CC	1.57	1.57	2.57	4.035	0.514	0.807	70.7	48.3	50	21.1	45.8	50	20.7	10	10	0.02	0	0.1	0.02	201	N/A
2024-03-05 20:19:17	00:03:50	Charge/CC	1.57	1.57	2.56	4.019	0.512	0.804	70.7	48.3	50	21.1	45.8	50	20.7	10	10	0.02	0	0.1	0.02	201	N/A
2024-03-05 20:19:18	00:03:51	Charge/CC	1.57	1.57	2.556	4.013	0.511	0.803	70.7	48.6	50	21.1	45.8	50	20.7	10	10	0.02	0	0.1	0.02	201	N/A
2024-03-05 20:19:19	00:03:52	Charge/CC	1.57	1.57	2.556	4.013	0.511	0.803	70.7	48.6	50	21.1	46	50	20.7	10	10	0.02	0	0.1	0.02	201	N/A
2024-03-05 20:19:20	00:03:53	Charge/CC	1.57	1.57	2.536	3.981	0.507	0.796	70.7	48.6	50	21.1	46	50	20.7	10	10	0.03	0	0.1	0.02	201	N/A
2024-03-05 20:19:21	00:03:54	Charge/CC	1.57	1.57	2.54	3.987	0.508	0.797	70.7	48.6	50	21.1	46	50	20.7	10	10	0.03	0	0.1	0.02	200	N/A
2024-03-05 20:19:22	00:03:55	Charge/CC	1.58	1.57	2.545	3.996	0.509	0.799	70.7	48.6	50	21.1	46	50	20.7	10	10	0.03	0	0.1	0.02	200	N/A
2024-03-05 20:19:23	00:03:56	Charge/CC	1.58	1.57	2.545	3.996	0.509	0.799	70.7	48.6	50	21.1	46	50	20.7	10	10	0.03	0	0.1	0.02	200	N/A
2024-03-05 20:19:24	00:03:57	Charge/CC	1.58	1.57	2.545	3.996	0.509	0.799	70.7	48.7	50	21.1	46.3	50	20.7	10	10	0.03	0	0.1	0.02	200	N/A
2024-03-05 20:19:25	00:03:58	Charge/CC	1.58	1.58	3.037	4.798	0.607	0.96	70.7	48.7	50	21.1	46.3	50	20.7	10	10	0.03	0	0.1	0.02	200	N/A
2024-03-05 20:19:26	00:03:59	Charge/CC	1.58	1.58	3.033	4.792	0.607	0.958	70.7	48.7	50	21.1	46.3	50	20.7	10	10	0.03	0	0.1	0.02	201	N/A
2024-03-05 20:19:27	00:04:00	Charge/CC	1.58	1.58	3.031	4.789	0.606	0.958	70.7	48.7	50	21.1	46.3	50	20.7	10	10	0.03	0	0.1	0.02	201	N/A
2024-03-05 20:19:28	00:04:01	Charge/CC	1.58	1.58	3.041	4.805	0.608	0.961	70.7	48.7	50	21.1	46.3	50	20.7	10	10	0.03	0	0.1	0.02	201	N/A
2024-03-05 20:19:29	00:04:02	Charge/CC	1.58	1.58	3.033	4.792	0.607	0.958	70.6	49	50	21.1	46.3	50	20.7	10	10	0.03	0	0.1	0.02	201	N/A
2024-03-05 20:19:30	00:04:03	Charge/CC	1.58	1.58	3.026	4.781	0.605	0.956	70.6	49	50	21.1	46.5	50	20.7	10	10	0.03	0	0.1	0.02	201	N/A
2024-03-05 20:19:31	00:04:04	Charge/CC	1.58	1.58	3.034	4.794	0.607	0.959	70.6	49	50	21.1	46.5	50	20.7	10	10	0.04	0	0.11	0.02	201	N/A
2024-03-05 20:19:32	00:04:05	Charge/CC	1.59	1.58	3.035	4.795	0.607	0.959	70.6	49	50	21.1	46.5	50	20.7	10	10	0.04	0	0.11	0.02	200	N/A
2024-03-05 20:19:33	00:04:06	Charge/CC	1.59	1.58	3.035	4.795	0.607	0.959	70.6	49	50	21.1	46.5	50	20.7	10	10	0.04	0	0.11	0.02	200	N/A
2024-03-05 20:19:34	00:04:07	Charge/CC	1.59	1.58	3.035	4.795	0.607	0.959	70.8	49	50	21.1	46.5	50	20.7	10	10	0.04	0	0.11	0.02	200	N/A
2024-03-05 20:19:35	00:04:08	Charge/CC	1.59	1.59	3.565	5.668	0.713	1.134	70.8	49.2	50	21.1	46.7	50	20.7	10	10	0.04	0	0.11	0.02	200	N/A
2024-03-05 20:19:36	00:04:09	Charge/CC	1.59	1.59	3.554	5.651	0.711	1.13	70.8	49.2	50	21.1	46.7	50	20.7	10	10	0.06	0	0.11	0.02	200	N/A
2024-03-05 20:19:37	00:04:10	Charge/CC	1.59	1.59	3.541	5.631	0.708	1.126	70.8	49.2	50	21.1	46.7	50	20.7	10	10	0.06	0	0.13	0.02	200	N/A
2024-03-05 20:19:38	00:04:11	Charge/CC	1.59	1.59	3.53	5.612	0.706	1.122	70.8	49.2	50	21.1	46.7	50	20.7	10	10	0.06	0	0.13	0.02	200	N/A
2024-03-05 20:19:39	00:04:12	Charge/CC	1.59	1.59	3.514	5.587	0.703	1.117	70.8	49.2	50	21.1	46.7	50	20.7	10	10	0.06	0	0.13	0.02	200	N/A
2024-03-05 20:19:40	00:04:13	Charge/CC	1.59	1.59	3.516	5.591	0.703	1.118	70.9	49.4	50.1	21.1	46.7	50	20.7	10	10	0.06	0	0.13	0.02	200	N/A
2024-03-05 20:19:41	00:04:14	Charge/CC	1.59	1.59	3.516	5.591	0.703	1.118	70.9	49.4	50.1	21.1	46.9	50	20.7	10	10	0.06	0	0.13	0.02	200	N/A
2024-03-05 20:19:42	00:04:15	Charge/CC	1.6	1.59	3.492	5.552	0.698	1.11	70.9	49.4	50.1	21.1	46.9	50	20.7	10	10	0.06	0	0.14	0.02	200	N/A
2024-03-05 20:19:43	00:04:16	Charge/CC	1.6	1.59	3.492	5.552	0.698	1.11	70.9	49.4	50.1	21.1	46.9	50	20.7	10	10	0.06	0	0.14	0.02	201	N/A
2024-03-05 20:19:44	00:04:17	Charge/CC	1.6	1.59	3.492	5.552	0.698	1.11	70.9	49.4	50.1	21.1	46.9	50	20.7	10	10	0.06	0	0.14	0.02	201	N/A
2024-03-05 20:19:45	00:04:18	Charge/CC	1.6	1.6	4.001	6.401	0.8	1.28	70.9	49.4	50.1	21.1	46.9	50	20.7	10	10	0.06	0	0.14	0.02	201	N/A
2024-03-05 20:19:46	00:04:19	Charge/CC	1.6	1.6	3.964	6.344	0.793	1.269	70.9	49.6	50	21.1	47.1	50	20.7	10	10	0.06	0	0.14	0.02	201	N/A
2024-03-05 20:19:47	00:04:20	Charge/CC	1.6	1.6	3.961	6.338	0.792	1.268	70.9	49.6	50	21.1	47.1	50	20.7	10	10	0.05	0	0.14	0.02	201	N/A
2024-03-05 20:19:48	00:04:21	Charge/CC	1.6	1.6	3.937	6.299	0.787	1.26	70.9	49.6	50	21.1	47.1	50	20.7	10	10	0.05	0	0.15	0.03	201	N/A
2024-03-05 20:19:49	00:04:22	Charge/CC	1.6	1.6	3.931	6.29	0.786	1.258	70.9	49.6	50	21.1	47.1	50	20.7	10	10	0.05	0	0.15	0.03	201	N/A
2024-03-05 20:19:50	00:04:23	Charge/CC	1.6	1.6	3.948	6.317	0.79	1.263	70.9	49.6	50	21.1	47.1	50	20.7	10	10	0.05	0	0.15	0.03	201	N/A
2024-03-05 20:19:51	00:04:24	Charge/CC	1.6	1.6	3.943	6.309	0.789	1.262	70.7	49.8	50	21.1	47.1	50	20.7	10	10	0.05	0	0.15	0.03	201	N/A
2024-03-05 20:19:52	00:04:25	Charge/CC	1.61	1.6	3.929	6.286	0.786	1.257	70.7	49.8	50	21.1	47.3	50.1	20.7	10	10	0.05	0	0.15	0.03	201	N/A
2024-03-05 20:19:53	00:04:26	Charge/CC	1.61	1.6	3.929	6.286	0.786	1.257	70.7	49.8	50	21.1	47.3	50.1	20.7	10	10	0.05	0	0.14	0.03	201	N/A
2024-03-05 20:19:54	00:04:27	Charge/CC	1.61	1.6	3.929	6.286	0.786	1.257	70.7	49.8	50	21.1	47.3	50.1	20.7	10	10	0.05	0	0.14	0.03	201	N/A
2024-03-05 20:19:55	00:04:28	Charge/CC	1.61	1.61	4.5	7.246	0.9	1.449	70.7	49.8	50	21.1	47.3	50.1	20.7	10	10	0.05	0	0.14	0.03	201	N/A
2024-03-05 20:19:56	00:04:29	Charge/CC	1.61	1.61	4.509	7.26	0.902	1.452	70.5	49.9	50	21.1	47.3	50.1	20.7	10	10	0.05	0	0.14	0.03	201	N/A
2024-03-05 20:19:57	00:04:30	Charge/CC	1.61	1.61	4.507	7.256	0.901	1.451	70.5	49.9	50.1	21.1	47.6	50	20.7	10	10	0.05	0	0.14	0.03	201	N/A
2024-03-05 20:19:58	00:04:31	Charge/CC	1.61	1.61	4.491	7.231	0.898	1.446	70.5	49.9	50.1	21.1	47.6	50	20.7	10	10	0.05	0	0.14	0.03	201	N/A
2024-03-05 20:19:59	00:04:32	Charge/CC	1.61	1.61	4.486	7.225	0.897	1.445	70.5	49.9	50.1	21.1	47.6	50	20.7	10	10	0.05	0	0.15	0.03	201	N/A
2024-03-05 20:20:00	00:04:33	Charge/CC	1.61	1.61	4.49	7.229	0.898	1.446	70.5	49.9	50.1	21.1	47.6	50	20.7	10	10	0.05	0	0.15	0.03	201	N/A
2024-03-05 20:20:01	00:04:34	Charge/CC	1.61	1.61	4.491	7.23	0.898	1.446	70.5	49.9	50.1	21.1	47.6	50	20.7	10	10	0.05	0	0.15	0.03	201	N/A
2024-03-05 20:20:02	00:04:35	Charge/CC	1.62	1.61	4.476	7.207	0.895	1.441	70.5	50.1	50	21.1	47.6	50	20.7	10	10	0.05	0	0.15	0.03	201	N/A
2024-03-05 20:20:03	00:04:36	Charge/CC	1.62	1.61	4.476	7.207	0.895	1.441	70.5	50.1	50	21.1	47.8	50.1	20.7	10	10	0.05	0	0.15	0.03	201	N/A
2024-03-05 20:20:04	00:04:37	Charge/CC	1.62	1.61	4.476	7.207	0.895	1.441	70.5	50.1	50	21.1	47.8	50.1	20.7	10	10	0.06	0	0.16	0.03	201	N/A
2024-03-05 20:20:05	00:04:38	Charge/CC	1.62	1.62	5.059	8.195	1.012	1.639	70.5	50.1	50	21.1	47.8	50.1	20.7	10	10	0.06	0	0.16	0.03	200	N/A
2024-03-05 20:20:06	00:04:39	Charge/CC	1.62	1.62	5.062	8.201	1.012	1.64	70.5	50.1	50	21.1	47.8	50.1	20.7	10	10	0.06	0	0.16	0.03	200	N/A
2024-03-05 20:20:07	00:04:40	Charge/CC	1.62	1.62	5.065	8.206	1.013	1.641	70.6	50.3	50	21.1	47.8	50.1	20.7	10	10	0.06	0	0.16	0.03	200	N/A
2024-03-05 20:20:08	00:04:41	Charge/CC	1.62	1.62	5.057	8.193	1.011	1.639	70.6	50.3	50.1	21	48	50.1	20.7	10	10	0.06	0	0.16	0.03	200	N/A
2024-03-05 20:20:09	00:04:42	Charge/CC	1.62	1.62	5.049	8.179	1.01	1.636	70.6	50.3	50.1	21	48	50.1	20.7	10	10	0.07	0	0.16	0.03	200	N/A
2024-03-05 20:20:10	00:04:43	Charge/CC	1.62	1.62	5.047	8.176	1.009	1.635	70.6	50.3	50.1	21	48	50.1	20.7	10	10	0.07	0	0.18	0.03	200	N/A
2024-03-05 20:20:11	00:04:44	Charge/CC	1.62	1.62	5.043	8.172	1.009	1.634	70.6	50.3	50.1	21	48	50.1	20.7	10	10	0.07	0	0.18	0.03	200	N/A
2024-03-05 20:20:12	00:04:45	Charge/CC	1.63	1.62	5.024	8.138	1.005	1.628	70.6	50.3	50.1	21	48	50.1	20.7	10	10	0.07	0	0.18	0.03	200	N/A
2024-03-05 20:20:13	00:04:46	Charge/CC	1.63	1.62	5.024	8.138	1.005	1.628	70.7	50.4	50	21.1	48.2	50.1	20.7	10	10	0.07	0	0.18	0.03	200	N/A
2024-03-05 20:20:14	00:04:47	Charge/CC	1.63	1.62	5.024	8.138	1.005	1.628	70.7	50.4	50	21.1	48.2	50.1	20.7	10	10	0.07	0	0.18	0.03	200	N/A
2024-03-05 20:20:15	00:04:48	Charge/CC	1.63	1.63	5.581	9.097	1.116	1.819	70.7	50.4	50	21.1	48.2	50.1	20.7	10	10	0.08	0	0.18	0.03	200	N/A
2024-03-05 20:20:16	00:04:49	Charge/CC	1.63	1.63	5.579	9.092	1.116	1.818	70.7	50.4	50	21.1	48.2	50.1	20.7	10	10	0.08	0	0.18	0.03	200	N/A
2024-03-05 20:20:17	00:04:50	Charge/CC	1.63	1.63	5.576	9.089	1.115	1.818	70.7	50.4	50	21.1	48.2	50.1	20.7	10	10	0.08	0	0.18	0.03	200	N/A
2024-03-05 20:20:18	00:04:51	Charge/CC	1.63	1.63	5.555	9.055	1.111	1.811	70.8	50.6	50.1	21.1	48.2	50.1	20.7	10	10	0.08	0	0.18	0.03	200	N/A
2024-03-05 20:20:19	00:04:52	Charge/CC	1.63	1.63	5.553	9.052	1.111	1.81	70.8	50.6	50.1	21	48.4	50.1	20.7	10	10	0.08	0	0.18	0.03	200	N/A
2024-03-05 20:20:20	00:04:53	Charge/CC	1.63	1.63	5.537	9.026	1.107	1.805	70.8	50.6	50.1	21	48.4	50.1	20.7	10	10	0.08	0	0.17	0.03	200	N/A
2024-03-05 20:20:21	00:04:54	Charge/CC	1.63	1.63	5.519	8.997	1.104	1.799	70.8	50.6	50.1	21	48.4	50.1	20.7	10	10	0.08	0	0.17	0.03	201	N/A
2024-03-05 20:20:22	00:04:55	Charge/CC	1.64	1.63	5.508	8.978	1.102	1.796	70.8	50.6	50.1	21	48.4	50.1	20.7	10	10	0.08	0	0.17	0.03	201	N/A
2024-03-05 20:20:23	00:04:56	Charge/CC	1.64	1.63	5.508	8.978	1.102	1.796	70.8	50.6	50.1	21	48.4	50.1	20.7	10	10	0.08	0	0.17	0.03	201	N/A
2024-03-05 20:20:24	00:04:57	Charge/CC	1.64	1.63	5.508	8.978	1.102	1.796	70.8	50.8	50.1	21	48.6	50.1	20.7	10	10	0.08	0	0.17	0.03	201	N/A
2024-03-05 20:20:25	00:04:58	Charge/CC	1.64	1.64	6.06	9.937	1.212	1.987	70.8	50.8	50.1	21	48.6	50	20.7	10	10	0.08	0	0.17	0.03	201	N/A
2024-03-05 20:20:26	00:04:59	Charge/CC	1.64	1.64	6.062	9.94	1.212	1.988	70.8	50.8	50.1	21	48.6	50	20.7	10	10	0.08	0	0.19	0.03	200	N/A
2024-03-05 20:20:27	00:05:00	Charge/CC	1.64	1.64	6.055	9.928	1.211	1.986	70.8	50.8	50.1	21	48.6	50	20.7	10	10	0.08	0	0.19	0.03	200	N/A
2024-03-05 20:20:28	00:05:01	Charge/CC	1.64	1.64	6.05	9.921	1.21	1.984	70.8	50.8	50.1	21	48.6	50	20.7	10	10	0.08	0	0.19	0.03	200	N/A
2024-03-05 20:20:29	00:05:02	Charge/CC	1.64	1.64	6.048	9.917	1.21	1.983	70.7	50.9	50.1	21	48.6	50	20.7	10	10	0.08	0	0.19	0.03	200	N/A
2024-03-05 20:20:30	00:05:03	Charge/CC	1.64	1.64	6.055	9.929	1.211	1.986	70.7	50.9	50.1	21	48.8	50	20.6	10	10	0.08	0	0.19	0.03	200	N/A
2024-03-05 20:20:31	00:05:04	Charge/CC	1.64	1.64	6.055	9.929	1.211	1.986	70.7	50.9	50.1	21	48.8	50	20.6	10	10	0.07	0	0.18	0.03	200	N/A
2024-03-05 20:20:32	00:05:05	Charge/CC	1.65	1.64	6.061	9.939	1.212	1.988	70.7	50.9	50.1	21	48.8	50	20.6	10	10	0.07	0	0.18	0.03	201	N/A
2024-03-05 20:20:33	00:05:06	Charge/CC	1.65	1.64	6.061	9.939	1.212	1.988	70.7	50.9	50.1	21	48.8	50	20.6	10	10	0.07	0	0.18	0.03	201	N/A
2024-03-05 20:20:34	00:05:07	Charge/CC	1.65	1.64	6.061	9.939	1.212	1.988	70.6	50.9	50.1	21	48.8	50	20.6	10	10	0.07	0	0.18	0.03	201	N/A
2024-03-05 20:20:35	00:05:08	Charge/CC	1.65	1.65	6.676	11.013	1.335	2.203	70.6	51.1	50	21	49	50.1	20.6	10	10	0.07	0	0.18	0.03	201	N/A
2024-03-05 20:20:36	00:05:09	Charge/CC	1.65	1.65	6.679	11.018	1.336	2.204	70.6	51.1	50	21	49	50.1	20.7	10	10	0.09	0	0.18	0.03	201	N/A
2024-03-05 20:20:37	00:05:10	Charge/CC	1.65	1.65	6.658	10.984	1.332	2.197	70.6	51.1	50	21	49	50.1	20.7	10	10	0.09	0	0.19	0.03	201	N/A
2024-03-05 20:20:38	00:05:11	Charge/CC	1.65	1.65	6.644	10.961	1.329	2.192	70.6	51.1	50	21	49	50.1	20.7	10	10	0.09	0	0.19	0.03	201	N/A
2024-03-05 20:20:39	00:05:12	Charge/CC	1.65	1.65	6.646	10.964	1.329	2.193	70.6	51.1	50	21	49	50.1	20.7	10	10	0.09	0	0.19	0.03	201	N/A
2024-03-05 20:20:40	00:05:13	Charge/CC	1.65	1.65	6.639	10.953	1.328	2.191	70.7	51.2	50	20.9	49	50.1	20.7	10	10	0.09	0	0.19	0.03	201	N/A
2024-03-05 20:20:41	00:05:14	Charge/CC	1.65	1.65	6.639	10.952	1.328	2.19	70.7	51.2	50	20.9	49.2	50.1	20.6	10	10	0.09	0	0.19	0.03	201	N/A
2024-03-05 20:20:42	00:05:15	Charge/CC	1.66	1.65	6.646	10.964	1.329	2.193	70.7	51.2	50	20.9	49.2	50.1	20.6	10	10	0.09	0	0.19	0.03	201	N/A
2024-03-05 20:20:43	00:05:16	Charge/CC	1.66	1.65	6.646	10.964	1.329	2.193	70.7	51.2	50	20.9	49.2	50.1	20.6	10	10	0.09	0	0.19	0.03	201	N/A
2024-03-05 20:20:44	00:05:17	Charge/CC	1.66	1.65	6.646	10.964	1.329	2.193	70.7	51.2	50	20.9	49.2	50.1	20.6	10	10	0.09	0	0.19	0.03	201	N/A
2024-03-05 20:20:45	00:05:18	Charge/CC	1.66	1.66	7.234	12.007	1.447	2.401	70.8	51.3	50	20.9	49.2	50.1	20.6	10	10	0.09	0	0.19	0.03	201	N/A
2024-03-05 20:20:46	00:05:19	Charge/CC	1.66	1.66	7.221	11.988	1.444	2.398	70.8	51.3	50.1	20.9	49.4	50.1	20.6	10	10	0.09	0	0.19	0.03	201	N/A
2024-03-05 20:20:47	00:05:20	Charge/CC	1.66	1.66	7.202	11.954	1.44	2.391	70.8	51.3	50.1	20.9	49.4	50.1	20.6	10	10	0.1	0	0.19	0.03	201	N/A
2024-03-05 20:20:48	00:05:21	Charge/CC	1.66	1.66	7.192	11.936	1.438	2.387	70.8	51.3	50.1	20.9	49.4	50.1	20.6	10	10	0.1	0	0.2	0.03	200	N/A
2024-03-05 20:20:49	00:05:22	Charge/CC	1.66	1.66	7.18	11.917	1.436	2.383	70.8	51.3	50.1	20.9	49.4	50.1	20.6	10	10	0.1	0	0.2	0.03	200	N/A
2024-03-05 20:20:50	00:05:23	Charge/CC	1.66	1.66	7.142	11.853	1.428	2.371	70.8	51.3	50.1	20.9	49.4	50.1	20.6	10	10	0.1	0	0.2	0.03	200	N/A
2024-03-05 20:20:51	00:05:24	Charge/CC	1.66	1.66	7.134	11.841	1.427	2.368	70.9	51.4	50.1	20.9	49.4	50.1	20.6	10	10	0.1	0	0.2	0.03	200	N/A
2024-03-05 20:20:52	00:05:25	Charge/CC	1.67	1.66	7.138	11.847	1.428	2.369	70.9	51.4	50.1	20.9	49.5	50.1	20.6	10	10	0.1	0	0.2	0.03	200	N/A
2024-03-05 20:20:53	00:05:26	Charge/CC	1.67	1.66	7.138	11.847	1.428	2.369	70.9	51.4	50.1	20.9	49.5	50.1	20.6	10	10	0.09	0	0.2	0.03	200	N/A
2024-03-05 20:20:54	00:05:27	Charge/CC	1.67	1.66	7.138	11.847	1.428	2.369	70.9	51.4	50.1	20.9	49.5	50.1	20.6	10	10	0.09	0	0.2	0.03	201	N/A
2024-03-05 20:20:55	00:05:28	Charge/CC	1.67	1.67	7.747	12.936	1.549	2.587	70.9	51.4	50.1	20.9	49.5	50.1	20.6	10	10	0.09	0	0.2	0.03	201	N/A
2024-03-05 20:20:56	00:05:29	Charge/CC	1.67	1.67	7.748	12.938	1.55	2.588	70.8	51.6	50.1	20.9	49.5	50.1	20.6	10	10	0.09	0	0.2	0.03	201	N/A
2024-03-05 20:20:57	00:05:30	Charge/CC	1.67	1.67	7.736	12.918	1.547	2.584	70.8	51.6	50.1	21	49.8	50.2	20.6	10	10	0.09	0	0.2	0.03	201	N/A
2024-03-05 20:20:58	00:05:31	Charge/CC	1.67	1.67	7.757	12.952	1.551	2.59	70.8	51.6	50.1	21	49.8	50.2	20.6	10	10	0.09	0	0.2	0.03	201	N/A
2024-03-05 20:20:59	00:05:32	Charge/CC	1.67	1.67	7.768	12.972	1.554	2.594	70.8	51.6	50.1	21	49.8	50.2	20.6	10	10	0.09	0	0.2	0.03	200	N/A
2024-03-05 20:21:00	00:05:33	Charge/CC	1.67	1.67	7.76	12.957	1.552	2.591	70.8	51.6	50.1	21	49.8	50.2	20.6	10	10	0.09	0	0.2	0.03	200	N/A
2024-03-05 20:21:01	00:05:34	Charge/CC	1.67	1.67	7.774	12.98	1.555	2.596	70.8	51.6	50.1	21	49.8	50.2	20.6	10	10	0.09	0	0.2	0.03	200	N/A
2024-03-05 20:21:02	00:05:35	Charge/CC	1.68	1.67	7.774	12.981	1.555	2.596	70.8	51.7	50.1	21	50	50.2	20.6	10	10	0.09	0	0.2	0.03	200	N/A
2024-03-05 20:21:03	00:05:36	Charge/CC	1.68	1.67	7.774	12.981	1.555	2.596	70.8	51.7	50.1	21	50	50.1	20.6	10	10	0.09	0	0.2	0.03	200	N/A
2024-03-05 20:21:04	00:05:37	Charge/CC	1.68	1.67	7.774	12.981	1.555	2.596	70.8	51.7	50.1	21	50	50.1	20.6	10	10	0.1	0	0.21	0.03	201	N/A
2024-03-05 20:21:05	00:05:38	Charge/CC	1.68	1.68	8.374	14.066	1.675	2.813	70.8	51.7	50.1	21	50	50.1	20.6	10	10	0.1	0	0.21	0.03	201	N/A
2024-03-05 20:21:06	00:05:39	Charge/CC	1.68	1.679	8.352	14.027	1.67	2.805	70.8	51.7	50.1	21	50	50.1	20.6	10	10	0.1	0	0.21	0.03	201	N/A
2024-03-05 20:21:07	00:05:40	Charge/CC	1.68	1.68	8.333	13.998	1.667	2.8	70.8	51.8	50.1	21	50	50.1	20.6	10	10	0.1	0	0.21	0.03	201	N/A
2024-03-05 20:21:08	00:05:41	Charge/CC	1.68	1.68	8.345	14.018	1.669	2.804	70.8	51.8	50.1	21	50.2	50.1	20.6	10	10	0.1	0	0.21	0.03	201	N/A
2024-03-05 20:21:09	00:05:42	Charge/CC	1.68	1.68	8.332	13.996	1.666	2.799	70.8	51.8	50.1	21	50.2	50.1	20.6	10	10	0.11	0	0.21	0.03	201	N/A
2024-03-05 20:21:10	00:05:43	Charge/CC	1.68	1.68	8.321	13.977	1.664	2.795	70.8	51.8	50.1	21	50.2	50.1	20.6	10	10	0.11	0	0.21	0.03	201	N/A
2024-03-05 20:21:11	00:05:44	Charge/CC	1.68	1.68	8.314	13.965	1.663	2.793	70.8	51.8	50.1	21	50.2	50.1	20.6	10	10	0.11	0	0.21	0.03	201	N/A
2024-03-05 20:21:12	00:05:45	Charge/CC	1.69	1.68	8.302	13.945	1.66	2.789	70.9	51.8	50.1	21	50.2	50.1	20.6	10	10	0.11	0	0.21	0.03	201	N/A
2024-03-05 20:21:13	00:05:46	Charge/CC	1.69	1.68	8.302	13.945	1.66	2.789	70.9	51.9	50.1	21	50.3	50.1	20.6	10	10	0.11	0	0.21	0.03	201	N/A
2024-03-05 20:21:14	00:05:47	Charge/CC	1.69	1.68	8.302	13.945	1.66	2.789	70.9	51.9	50.1	21	50.3	50.1	20.6	10	10	0.1	0	0.21	0.03	201	N/A
2024-03-05 20:21:15	00:05:48	Charge/CC	1.69	1.69	8.853	14.959	1.771	2.992	70.9	51.9	50.1	21	50.3	50.1	20.6	10	10	0.1	0	0.21	0.03	201	N/A
2024-03-05 20:21:16	00:05:49	Charge/CC	1.69	1.689	8.872	14.989	1.774	2.998	70.9	51.9	50.1	21	50.3	50.1	20.6	10	10	0.1	0	0.21	0.03	201	N/A
2024-03-05 20:21:17	00:05:50	Charge/CC	1.69	1.69	8.881	15.007	1.776	3.001	70.9	51.9	50.1	21	50.3	50.1	20.6	10	10	0.1	0	0.21	0.03	201	N/A
2024-03-05 20:21:18	00:05:51	Charge/CC	1.69	1.69	8.905	15.047	1.781	3.009	70.9	52.1	49.9	21	50.3	50.1	20.6	10	10	0.1	0	0.21	0.03	201	N/A
2024-03-05 20:21:19	00:05:52	Charge/CC	1.69	1.689	8.918	15.067	1.784	3.013	70.9	52.1	49.9	21	50.5	50.2	20.6	10	10	0.1	0	0.21	0.03	201	N/A
2024-03-05 20:21:20	00:05:53	Charge/CC	1.69	1.69	8.891	15.024	1.778	3.005	70.9	52.1	49.9	21	50.5	50.2	20.6	10	10	0.11	0	0.22	0.03	201	N/A
2024-03-05 20:21:21	00:05:54	Charge/CC	1.69	1.69	8.894	15.032	1.779	3.006	70.9	52.1	49.9	21	50.5	50.2	20.6	10	10	0.11	0	0.22	0.03	201	N/A
2024-03-05 20:21:22	00:05:55	Charge/CC	1.7	1.69	8.898	15.036	1.78	3.007	70.9	52.1	49.9	21	50.5	50.2	20.6	10	10	0.11	0	0.22	0.03	201	N/A
2024-03-05 20:21:23	00:05:56	Charge/CC	1.7	1.69	8.898	15.036	1.78	3.007	70.8	52.1	49.9	21	50.5	50.2	20.6	10	10	0.11	0	0.22	0.03	201	N/A
2024-03-05 20:21:24	00:05:57	Charge/CC	1.7	1.69	8.898	15.036	1.78	3.007	70.8	52.2	50.1	21	50.7	50.2	20.6	10	10	0.11	0	0.22	0.03	201	N/A
2024-03-05 20:21:25	00:05:58	Charge/CC	1.7	1.7	9.472	16.101	1.894	3.22	70.8	52.2	50.1	21	50.7	50.2	20.6	10	10	0.11	0	0.22	0.03	201	N/A
2024-03-05 20:21:26	00:05:59	Charge/CC	1.7	1.7	9.449	16.062	1.89	3.212	70.8	52.2	50.1	21	50.7	50.2	20.6	10	10	0.11	0	0.21	0.03	201	N/A
2024-03-05 20:21:27	00:06:00	Charge/CC	1.7	1.7	9.424	16.019	1.885	3.204	70.8	52.2	50.1	21	50.7	50.2	20.6	10	10	0.11	0	0.21	0.03	201	N/A
2024-03-05 20:21:28	00:06:01	Charge/CC	1.7	1.7	9.424	16.023	1.885	3.205	70.8	52.2	50.1	21	50.7	50.2	20.6	10	10	0.11	0	0.21	0.03	201	N/A
2024-03-05 20:21:29	00:06:02	Charge/CC	1.7	1.699	9.434	16.033	1.887	3.207	70.8	52.3	50	21	50.7	50.2	20.6	10	10	0.11	0	0.21	0.03	201	N/A
2024-03-05 20:21:30	00:06:03	Charge/CC	1.7	1.7	9.453	16.071	1.891	3.214	70.8	52.3	50	21	50.9	50.1	20.6	10	10	0.11	0	0.21	0.03	201	N/A
2024-03-05 20:21:31	00:06:04	Charge/CC	1.7	1.7	9.449	16.062	1.89	3.212	70.8	52.3	50	21	50.9	50.1	20.6	10	10	0.1	0	0.23	0.03	201	N/A
2024-03-05 20:21:32	00:06:05	Charge/CC	1.71	1.7	9.461	16.082	1.892	3.216	70.8	52.3	50	21	50.9	50.1	20.6	10	10	0.1	0	0.23	0.03	201	N/A
2024-03-05 20:21:33	00:06:06	Charge/CC	1.71	1.7	9.461	16.082	1.892	3.216	70.8	52.3	50	21	50.9	50.1	20.6	10	10	0.1	0	0.23	0.03	201	N/A
2024-03-05 20:21:34	00:06:07	Charge/CC	1.71	1.7	9.461	16.082	1.892	3.216	70.8	52.4	50	21	50.9	50.1	20.6	10	10	0.1	0	0.23	0.03	201	N/A
2024-03-05 20:21:35	00:06:08	Charge/CC	1.71	1.699	9.441	16.044	1.888	3.209	70.8	52.4	50.1	21.1	51	50.2	20.6	10	10	0.1	0	0.23	0.03	201	N/A
2024-03-05 20:21:36	00:06:09	Charge/CC	1.71	1.71	10.049	17.186	2.01	3.437	70.8	52.4	50.1	21.1	51	50.2	20.6	10	10	0.12	0	0.23	0.03	201	N/A
2024-03-05 20:21:37	00:06:10	Charge/CC	1.71	1.71	10.048	17.181	2.01	3.436	70.8	52.4	50.1	21.1	51	50.2	20.6	10	10	0.12	0	0.22	0.03	201	N/A
2024-03-05 20:21:38	00:06:11	Charge/CC	1.71	1.709	10.031	17.148	2.006	3.43	70.8	52.4	50.1	21.1	51	50.2	20.6	10	10	0.12	0	0.22	0.03	201	N/A
2024-03-05 20:21:39	00:06:12	Charge/CC	1.71	1.71	10.041	17.172	2.008	3.434	70.8	52.4	50.1	21.1	51	50.2	20.6	10	10	0.12	0	0.22	0.03	201	N/A
2024-03-05 20:21:40	00:06:13	Charge/CC	1.71	1.71	10.026	17.143	2.005	3.429	70.8	52.5	50.1	20.9	51	50.2	20.6	10	10	0.12	0	0.22	0.03	201	N/A
2024-03-05 20:21:41	00:06:14	Charge/CC	1.71	1.71	10.008	17.112	2.002	3.422	70.8	52.5	50.1	20.9	51.2	50.1	20.6	10	10	0.12	0	0.22	0.03	201	N/A
2024-03-05 20:21:42	00:06:15	Charge/CC	1.72	1.71	9.989	17.079	1.998	3.416	70.8	52.5	50.1	20.9	51.2	50.1	20.6	10	10	0.11	0	0.23	0.03	201	N/A
2024-03-05 20:21:43	00:06:16	Charge/CC	1.72	1.71	9.989	17.079	1.998	3.416	70.8	52.5	50.1	20.9	51.2	50.1	20.6	10	10	0.11	0	0.23	0.03	200	N/A
2024-03-05 20:21:44	00:06:17	Charge/CC	1.72	1.71	9.989	17.079	1.998	3.416	70.8	52.5	50.1	20.9	51.2	50.1	20.6	10	10	0.11	0	0.23	0.03	200	N/A
2024-03-05 20:21:45	00:06:18	Charge/CC	1.72	1.72	10.588	18.209	2.118	3.642	70.7	52.6	50.1	20.9	51.2	50.1	20.6	10	10	0.11	0	0.23	0.03	200	N/A
2024-03-05 20:21:46	00:06:19	Charge/CC	1.72	1.72	10.604	18.241	2.121	3.648	70.7	52.6	50	21.1	51.4	50.1	20.6	10	10	0.11	0	0.23	0.03	200	N/A
2024-03-05 20:21:47	00:06:20	Charge/CC	1.72	1.72	10.611	18.25	2.122	3.65	70.7	52.6	50	21.1	51.4	50.1	20.6	10	10	0.11	0	0.23	0.03	200	N/A
2024-03-05 20:21:48	00:06:21	Charge/CC	1.72	1.72	10.604	18.238	2.121	3.648	70.7	52.6	50	21.1	51.4	50.1	20.6	10	10	0.11	0	0.23	0.03	201	N/A
2024-03-05 20:21:49	00:06:22	Charge/CC	1.72	1.72	10.598	18.227	2.12	3.645	70.7	52.6	50	21.1	51.4	50.1	20.6	10	10	0.11	0	0.23	0.03	201	N/A
2024-03-05 20:21:50	00:06:23	Charge/CC	1.72	1.72	10.604	18.24	2.121	3.648	70.7	52.6	50	21.1	51.4	50.1	20.6	10	10	0.11	0	0.23	0.03	201	N/A
2024-03-05 20:21:51	00:06:24	Charge/CC	1.72	1.72	10.599	18.229	2.12	3.646	70.7	52.7	50	21.1	51.6	50.1	20.6	10	10	0.11	0	0.23	0.03	201	N/A
2024-03-05 20:21:52	00:06:25	Charge/CC	1.73	1.72	10.584	18.202	2.117	3.64	70.7	52.7	50	21.1	51.6	50.1	20.6	10	10	0.11	0	0.23	0.03	201	N/A
2024-03-05 20:21:53	00:06:26	Charge/CC	1.73	1.72	10.584	18.202	2.117	3.64	70.7	52.7	50	21.1	51.6	50.1	20.6	10	10	0.12	0	0.22	0.03	201	N/A
2024-03-05 20:21:54	00:06:27	Charge/CC	1.73	1.72	10.584	18.202	2.117	3.64	70.7	52.7	50	21.1	51.6	50.1	20.6	10	10	0.12	0	0.22	0.03	201	N/A
2024-03-05 20:21:55	00:06:28	Charge/CC	1.73	1.73	11.167	19.317	2.233	3.863	70.7	52.7	50	21.1	51.6	50.1	20.6	10	10	0.12	0	0.22	0.03	201	N/A
2024-03-05 20:21:56	00:06:29	Charge/CC	1.73	1.73	11.159	19.303	2.232	3.861	70.8	52.7	50.1	21.1	51.6	50.1	20.6	10	10	0.12	0	0.22	0.03	201	N/A
2024-03-05 20:21:57	00:06:30	Charge/CC	1.73	1.73	11.133	19.259	2.227	3.852	70.8	52.7	50.1	21.1	51.8	50.1	20.6	10	10	0.12	0	0.22	0.03	201	N/A
2024-03-05 20:21:58	00:06:31	Charge/CC	1.73	1.73	11.142	19.275	2.228	3.855	70.8	52.7	50.1	21.1	51.8	50.1	20.6	10	10	0.11	0	0.23	0.03	201	N/A
2024-03-05 20:21:59	00:06:32	Charge/CC	1.73	1.73	11.159	19.303	2.232	3.861	70.8	52.7	50.1	21.1	51.8	50.1	20.6	10	10	0.11	0	0.23	0.03	201	N/A
2024-03-05 20:22:00	00:06:33	Charge/CC	1.73	1.73	11.174	19.329	2.235	3.866	70.8	52.7	50.1	21.1	51.8	50.1	20.6	10	10	0.11	0	0.23	0.03	201	N/A
2024-03-05 20:22:01	00:06:34	Charge/CC	1.73	1.73	11.161	19.307	2.232	3.861	70.8	52.7	50.1	21.1	51.8	50.1	20.6	10	10	0.11	0	0.23	0.03	201	N/A
2024-03-05 20:22:02	00:06:35	Charge/CC	1.74	1.73	11.142	19.274	2.228	3.855	70.8	52.8	50.1	20.9	52	50.1	20.6	10	10	0.11	0	0.23	0.03	201	N/A
2024-03-05 20:22:03	00:06:36	Charge/CC	1.74	1.73	11.142	19.274	2.228	3.855	70.8	52.8	50.1	20.9	52	50.1	20.6	10	10	0.12	0	0.23	0.03	201	N/A
2024-03-05 20:22:04	00:06:37	Charge/CC	1.74	1.73	11.142	19.274	2.228	3.855	70.8	52.8	50.1	20.9	52	50.1	20.6	10	10	0.12	0	0.22	0.03	201	N/A
2024-03-05 20:22:05	00:06:38	Charge/CC	1.74	1.73	11.159	19.303	2.232	3.861	70.8	52.8	50.1	20.9	52	50.1	20.6	10	10	0.12	0	0.22	0.03	201	N/A
2024-03-05 20:22:06	00:06:39	Charge/CC	1.74	1.74	11.763	20.466	2.353	4.093	70.8	52.8	50.1	20.9	52	50.1	20.6	10	10	0.12	0	0.22	0.03	201	N/A
2024-03-05 20:22:07	00:06:40	Charge/CC	1.74	1.74	11.759	20.46	2.352	4.092	70.8	52.9	50.1	20.9	52	50.1	20.6	10	10	0.12	0	0.22	0.03	201	N/A
2024-03-05 20:22:08	00:06:41	Charge/CC	1.74	1.74	11.749	20.441	2.35	4.088	70.8	52.9	50.1	21	52.1	50.1	20.6	10	10	0.12	0	0.22	0.03	201	N/A
2024-03-05 20:22:09	00:06:42	Charge/CC	1.74	1.74	11.741	20.428	2.348	4.086	70.8	52.9	50.1	21	52.1	50.1	20.6	10	10	0.13	0	0.24	0.03	201	N/A
2024-03-05 20:22:10	00:06:43	Charge/CC	1.74	1.74	11.728	20.405	2.346	4.081	70.8	52.9	50.1	21	52.1	50.1	20.6	10	10	0.13	0	0.24	0.03	201	N/A
2024-03-05 20:22:11	00:06:44	Charge/CC	1.74	1.74	11.71	20.374	2.342	4.075	70.8	52.9	50.1	21	52.1	50.1	20.6	10	10	0.13	0	0.24	0.03	201	N/A
2024-03-05 20:22:12	00:06:45	Charge/CC	1.75	1.74	11.703	20.357	2.341	4.071	70.8	52.9	50.1	21	52.1	50.1	20.6	10	10	0.13	0	0.24	0.03	201	N/A
2024-03-05 20:22:13	00:06:46	Charge/CC	1.75	1.74	11.703	20.357	2.341	4.071	70.8	53	50.1	20.9	52.3	50.1	20.6	10	10	0.13	0	0.24	0.03	201	N/A
2024-03-05 20:22:14	00:06:47	Charge/CC	1.75	1.74	11.703	20.357	2.341	4.071	70.8	53	50.1	20.9	52.3	50.1	20.6	10	10	0.12	0	0.24	0.03	201	N/A
2024-03-05 20:22:15	00:06:48	Charge/CC	1.75	1.74	11.729	20.407	2.346	4.081	70.8	53	50.1	20.9	52.3	50.1	20.6	10	10	0.12	0	0.23	0.03	201	N/A
2024-03-05 20:22:16	00:06:49	Charge/CC	1.75	1.75	12.355	21.621	2.471	4.324	70.8	53	50.1	20.9	52.3	50.1	20.6	10	10	0.12	0	0.23	0.03	201	N/A
2024-03-05 20:22:17	00:06:50	Charge/CC	1.75	1.75	12.358	21.624	2.472	4.325	70.8	53	50.1	20.9	52.3	50.1	20.6	10	10	0.12	0	0.23	0.03	201	N/A
2024-03-05 20:22:18	00:06:51	Charge/CC	1.75	1.75	12.345	21.602	2.469	4.32	70.8	53	50.1	21	52.3	50.1	20.6	10	10	0.12	0	0.23	0.03	201	N/A
2024-03-05 20:22:19	00:06:52	Charge/CC	1.75	1.75	12.342	21.598	2.468	4.32	70.8	53	50.1	21	52.5	50.1	20.6	10	10	0.12	0	0.23	0.03	201	N/A
2024-03-05 20:22:20	00:06:53	Charge/CC	1.75	1.75	12.351	21.613	2.47	4.323	70.8	53	50.1	21	52.5	50.1	20.6	10	10	0.12	0	0.23	0.03	201	N/A
2024-03-05 20:22:21	00:06:54	Charge/CC	1.75	1.75	12.34	21.593	2.468	4.319	70.8	53	50.1	21	52.5	50.1	20.6	10	10	0.12	0	0.23	0.03	201	N/A
2024-03-05 20:22:22	00:06:55	Charge/CC	1.76	1.75	12.327	21.572	2.465	4.314	70.8	53	50.1	21	52.5	50.1	20.6	10	10	0.12	0	0.23	0.03	201	N/A
2024-03-05 20:22:23	00:06:56	Charge/CC	1.76	1.75	12.327	21.572	2.465	4.314	70.8	53.1	50.1	21	52.5	50.1	20.6	10	10	0.12	0	0.23	0.03	201	N/A
2024-03-05 20:22:24	00:06:57	Charge/CC	1.76	1.75	12.327	21.572	2.465	4.314	70.8	53.1	50.1	21	52.6	50.1	20.6	10	10	0.12	0	0.23	0.03	201	N/A
2024-03-05 20:22:25	00:06:58	Charge/CC	1.76	1.76	12.906	22.713	2.581	4.543	70.8	53.1	50.1	21	52.6	50.1	20.6	10	10	0.13	0	0.23	0.03	201	N/A
2024-03-05 20:22:26	00:06:59	Charge/CC	1.76	1.76	12.902	22.706	2.58	4.541	70.8	53.1	50.1	21	52.6	50.1	20.6	10	10	0.13	0	0.24	0.03	201	N/A
2024-03-05 20:22:27	00:07:00	Charge/CC	1.76	1.76	12.914	22.723	2.583	4.545	70.8	53.1	50.1	21	52.6	50.1	20.6	10	10	0.13	0	0.24	0.03	201	N/A
2024-03-05 20:22:28	00:07:01	Charge/CC	1.76	1.76	12.914	22.728	2.583	4.546	70.8	53.1	50.1	21	52.6	50.1	20.6	10	10	0.13	0	0.24	0.03	201	N/A
2024-03-05 20:22:29	00:07:02	Charge/CC	1.76	1.76	12.908	22.718	2.582	4.544	70.8	53.1	50.1	21	52.6	50.1	20.6	10	10	0.13	0	0.24	0.03	201	N/A
2024-03-05 20:22:30	00:07:03	Charge/CC	1.76	1.76	12.888	22.682	2.578	4.536	70.8	53.1	50.1	21	52.8	50.1	20.7	10	10	0.13	0	0.24	0.03	201	N/A
2024-03-05 20:22:31	00:07:04	Charge/CC	1.76	1.76	12.891	22.687	2.578	4.537	70.8	53.1	50.1	21	52.8	50.1	20.7	10	10	0.13	0	0.23	0.03	201	N/A
2024-03-05 20:22:32	00:07:05	Charge/CC	1.77	1.76	12.891	22.687	2.578	4.537	70.8	53.1	50.1	21	52.8	50.1	20.7	10	10	0.13	0	0.23	0.03	201	N/A
2024-03-05 20:22:33	00:07:06	Charge/CC	1.77	1.76	12.891	22.687	2.578	4.537	70.8	53.1	50.1	21	52.8	50.1	20.7	10	10	0.13	0	0.23	0.03	201	N/A
2024-03-05 20:22:34	00:07:07	Charge/CC	1.77	1.76	12.891	22.687	2.578	4.537	70.8	53.1	50.1	21	52.8	50.1	20.7	10	10	0.13	0	0.23	0.03	201	N/A
2024-03-05 20:22:35	00:07:08	Charge/CC	1.77	1.77	13.495	23.884	2.699	4.777	70.8	53.1	50.1	21	53	50.1	20.6	10	10	0.13	0	0.23	0.03	201	N/A
2024-03-05 20:22:36	00:07:09	Charge/CC	1.77	1.77	13.484	23.865	2.697	4.773	70.8	53.1	50.1	21	53	50.1	20.6	10	10	0.13	0	0.23	0.03	201	N/A
2024-03-05 20:22:37	00:07:10	Charge/CC	1.77	1.77	13.484	23.865	2.697	4.773	70.8	53.1	50.1	21	53	50.1	20.6	10	10	0.13	0	0.25	0.03	201	N/A
2024-03-05 20:22:38	00:07:11	Charge/CC	1.77	1.77	13.497	23.888	2.699	4.778	70.8	53.1	50.1	21	53	50.1	20.6	10	10	0.13	0	0.25	0.03	201	N/A
2024-03-05 20:22:39	00:07:12	Charge/CC	1.77	1.77	13.474	23.848	2.695	4.77	70.8	53.1	50.1	21	53	50.1	20.6	10	10	0.13	0	0.25	0.03	201	N/A
2024-03-05 20:22:40	00:07:13	Charge/CC	1.77	1.77	13.481	23.86	2.696	4.772	70.8	53.1	50.1	20.9	53.1	50.1	20.6	10	10	0.13	0	0.25	0.03	201	N/A
2024-03-05 20:22:41	00:07:14	Charge/CC	1.77	1.77	13.473	23.846	2.695	4.769	70.8	53.1	50.1	20.9	53.1	50.1	20.6	10	10	0.13	0	0.25	0.03	201	N/A
2024-03-05 20:22:42	00:07:15	Charge/CC	1.78	1.77	13.454	23.813	2.691	4.763	70.8	53.1	50.1	20.9	53.1	50.1	20.6	10	10	0.13	0	0.24	0.03	201	N/A
2024-03-05 20:22:43	00:07:16	Charge/CC	1.78	1.77	13.454	23.813	2.691	4.763	70.8	53.1	50.1	20.9	53.1	50.1	20.6	10	10	0.13	0	0.24	0.03	201	N/A
2024-03-05 20:22:44	00:07:17	Charge/CC	1.78	1.77	13.454	23.813	2.691	4.763	70.8	53.1	50.1	20.9	53.1	50.1	20.6	10	10	0.13	0	0.24	0.03	201	N/A
2024-03-05 20:22:45	00:07:18	Charge/CC	1.78	1.78	14.039	24.989	2.808	4.998	70.9	53.2	50	20.9	53.1	50.1	20.6	10	10	0.13	0	0.24	0.03	201	N/A
2024-03-05 20:22:46	00:07:19	Charge/CC	1.78	1.78	14.055	25.017	2.811	5.003	70.9	53.2	50	20.9	53.2	50.1	20.6	10	10	0.13	0	0.24	0.03	201	N/A
2024-03-05 20:22:47	00:07:20	Charge/CC	1.78	1.78	14.046	25	2.809	5	70.9	53.2	50	20.9	53.2	50.1	20.6	10	10	0.13	0	0.24	0.03	201	N/A
2024-03-05 20:22:48	00:07:21	Charge/CC	1.78	1.78	14.051	25.009	2.81	5.002	70.9	53.2	50	20.9	53.2	50.1	20.6	10	10	0.13	0	0.24	0.03	201	N/A
2024-03-05 20:22:49	00:07:22	Charge/CC	1.78	1.78	14.063	25.032	2.813	5.006	70.9	53.2	50	20.9	53.2	50.1	20.6	10	10	0.13	0	0.24	0.03	201	N/A
2024-03-05 20:22:50	00:07:23	Charge/CC	1.78	1.78	14.043	24.995	2.809	4.999	70.8	53.2	50	20.9	53.2	50.1	20.6	10	10	0.13	0	0.24	0.03	201	N/A
2024-03-05 20:22:51	00:07:24	Charge/CC	1.78	1.78	14.052	25.012	2.81	5.002	70.8	53.3	50.1	20.9	53.3	50.1	20.6	10	10	0.13	0	0.24	0.03	201	N/A
2024-03-05 20:22:52	00:07:25	Charge/CC	1.79	1.78	14.03	24.972	2.806	4.994	70.8	53.3	50.1	20.9	53.3	50.1	20.6	10	10	0.13	0	0.24	0.03	201	N/A
2024-03-05 20:22:53	00:07:26	Charge/CC	1.79	1.78	14.03	24.972	2.806	4.994	70.8	53.3	50.1	20.9	53.3	50.1	20.6	10	10	0.13	0	0.25	0.03	201	N/A
2024-03-05 20:22:54	00:07:27	Charge/CC	1.79	1.78	14.03	24.972	2.806	4.994	70.8	53.3	50.1	20.9	53.3	50.1	20.6	10	10	0.13	0	0.25	0.03	201	N/A
2024-03-05 20:22:55	00:07:28	Charge/CC	1.79	1.78	13.998	24.916	2.8	4.983	70.8	53.3	50.1	20.9	53.3	50.1	20.6	10	10	0.13	0	0.25	0.03	201	N/A
2024-03-05 20:22:56	00:07:29	Charge/CC	1.79	1.79	14.607	26.145	2.921	5.229	70.7	53.3	50	20.9	53.3	50.1	20.6	10	10	0.13	0	0.25	0.03	201	N/A
2024-03-05 20:22:57	00:07:30	Charge/CC	1.79	1.79	14.629	26.185	2.926	5.237	70.7	53.3	50	20.9	53.4	50.1	20.6	10	10	0.13	0	0.25	0.03	201	N/A
2024-03-05 20:22:58	00:07:31	Charge/CC	1.79	1.79	14.623	26.174	2.925	5.235	70.7	53.3	50	20.9	53.4	50.1	20.6	10	10	0.13	0	0.24	0.03	201	N/A
2024-03-05 20:22:59	00:07:32	Charge/CC	1.79	1.79	14.619	26.167	2.924	5.233	70.7	53.3	50	20.9	53.4	50.1	20.6	10	10	0.13	0	0.24	0.03	201	N/A
2024-03-05 20:23:00	00:07:33	Charge/CC	1.79	1.79	14.599	26.131	2.92	5.226	70.7	53.3	50	20.9	53.4	50.1	20.6	10	10	0.13	0	0.24	0.03	201	N/A
2024-03-05 20:23:01	00:07:34	Charge/CC	1.79	1.79	14.609	26.144	2.922	5.229	70.7	53.3	50	20.9	53.4	50.1	20.6	10	10	0.13	0	0.24	0.03	201	N/A
2024-03-05 20:23:02	00:07:35	Charge/CC	1.8	1.79	14.583	26.103	2.917	5.221	70.7	53.4	50	20.9	53.6	50.1	20.6	10	10	0.13	0	0.24	0.03	201	N/A
2024-03-05 20:23:03	00:07:36	Charge/CC	1.8	1.79	14.583	26.103	2.917	5.221	70.7	53.4	50	20.9	53.6	50.1	20.6	10	10	0.13	0	0.24	0.03	201	N/A
2024-03-05 20:23:04	00:07:37	Charge/CC	1.8	1.79	14.583	26.103	2.917	5.221	70.7	53.4	50	20.9	53.6	50.1	20.6	10	10	0.13	0	0.25	0.03	201	N/A
2024-03-05 20:23:05	00:07:38	Charge/CC	1.8	1.8	15.185	27.333	3.037	5.467	70.7	53.4	50	20.9	53.6	50.1	20.6	10	10	0.13	0	0.25	0.03	201	N/A
2024-03-05 20:23:06	00:07:39	Charge/CC	1.8	1.8	15.208	27.375	3.042	5.475	70.7	53.4	50	20.9	53.6	50.1	20.6	10	10	0.13	0	0.25	0.03	201	N/A
2024-03-05 20:23:07	00:07:40	Charge/CC	1.8	1.8	15.204	27.362	3.041	5.472	70.6	53.4	50	20.9	53.6	50.1	20.6	10	10	0.13	0	0.25	0.03	201	N/A
2024-03-05 20:23:08	00:07:41	Charge/CC	1.8	1.8	15.204	27.367	3.041	5.473	70.6	53.4	50	20.9	53.7	49.9	20.6	10	10	0.13	0	0.25	0.03	201	N/A
2024-03-05 20:23:09	00:07:42	Charge/CC	1.8	1.8	15.185	27.333	3.037	5.467	70.6	53.4	50	20.9	53.7	49.9	20.6	10	10	0.13	0	0.24	0.03	201	N/A
2024-03-05 20:23:10	00:07:43	Charge/CC	1.8	1.8	15.129	27.226	3.026	5.445	70.6	53.4	50	20.9	53.7	49.9	20.6	10	10	0.13	0	0.24	0.03	201	N/A
2024-03-05 20:23:11	00:07:44	Charge/CC	1.8	1.8	15.188	27.333	3.038	5.467	70.6	53.4	50	20.9	53.7	49.9	20.6	10	10	0.13	0	0.24	0.03	201	N/A
2024-03-05 20:23:12	00:07:45	Charge/CC	1.81	1.8	15.17	27.306	3.034	5.461	70.6	53.5	50	20.9	53.7	49.9	20.6	10	10	0.13	0	0.24	0.03	201	N/A
2024-03-05 20:23:13	00:07:46	Charge/CC	1.81	1.8	15.17	27.306	3.034	5.461	70.6	53.5	50	20.8	53.9	50	20.6	10	10	0.13	0	0.24	0.03	201	N/A
2024-03-05 20:23:14	00:07:47	Charge/CC	1.81	1.8	15.17	27.306	3.034	5.461	70.6	53.5	50	20.8	53.9	50	20.6	10	10	0.14	0	0.24	0.03	201	N/A
2024-03-05 20:23:15	00:07:48	Charge/CC	1.81	1.81	15.766	28.536	3.153	5.707	70.6	53.5	50	20.8	53.9	50	20.6	10	10	0.14	0	0.24	0.03	201	N/A
2024-03-05 20:23:16	00:07:49	Charge/CC	1.81	1.81	15.735	28.48	3.147	5.696	70.6	53.5	50	20.8	53.9	50	20.6	10	10	0.14	0	0.24	0.03	201	N/A
2024-03-05 20:23:17	00:07:50	Charge/CC	1.81	1.81	15.747	28.502	3.149	5.7	70.6	53.5	50	20.8	53.9	50	20.6	10	10	0.14	0	0.24	0.03	201	N/A
2024-03-05 20:23:18	00:07:51	Charge/CC	1.81	1.81	15.774	28.545	3.155	5.709	70.6	53.5	50	20.8	53.9	50	20.6	10	10	0.14	0	0.24	0.03	201	N/A
2024-03-05 20:23:19	00:07:52	Charge/CC	1.81	1.81	15.76	28.525	3.152	5.705	70.6	53.5	50	20.8	53.9	50.1	20.6	10	10	0.14	0	0.24	0.03	201	N/A
2024-03-05 20:23:20	00:07:53	Charge/CC	1.81	1.81	15.773	28.549	3.155	5.71	70.6	53.5	50	20.8	53.9	50.1	20.6	10	10	0.14	0	0.25	0.03	201	N/A
2024-03-05 20:23:21	00:07:54	Charge/CC	1.81	1.81	15.765	28.534	3.153	5.707	70.6	53.5	50	20.8	53.9	50.1	20.6	10	10	0.14	0	0.25	0.03	200	N/A
2024-03-05 20:23:22	00:07:55	Charge/CC	1.82	1.81	15.739	28.487	3.148	5.697	70.6	53.5	50	20.8	53.9	50.1	20.6	10	10	0.14	0	0.25	0.03	200	N/A
2024-03-05 20:23:23	00:07:56	Charge/CC	1.82	1.81	15.739	28.487	3.148	5.697	70.6	53.5	50	20.8	53.9	50.1	20.6	10	10	0.14	0	0.25	0.03	200	N/A
2024-03-05 20:23:24	00:07:57	Charge/CC	1.82	1.81	15.739	28.487	3.148	5.697	70.6	53.5	50	20.8	54	50	20.5	10	10	0.14	0	0.25	0.03	200	N/A
2024-03-05 20:23:25	00:07:58	Charge/CC	1.82	1.81	15.734	28.477	3.147	5.695	70.6	53.5	50	20.8	54	50	20.5	10	10	0.13	0	0.25	0.03	200	N/A
2024-03-05 20:23:26	00:07:59	Charge/CC	1.82	1.82	16.351	29.759	3.27	5.952	70.6	53.5	50	20.8	54	50	20.5	10	10	0.13	0	0.24	0.03	201	N/A
2024-03-05 20:23:27	00:08:00	Charge/CC	1.82	1.82	16.368	29.785	3.274	5.957	70.6	53.5	50	20.8	54	50	20.5	10	10	0.13	0	0.24	0.03	201	N/A
2024-03-05 20:23:28	00:08:01	Charge/CC	1.82	1.82	16.363	29.781	3.273	5.956	70.6	53.5	50	20.8	54	50	20.5	10	10	0.13	0	0.24	0.03	201	N/A
2024-03-05 20:23:29	00:08:02	Charge/CC	1.82	1.82	16.363	29.78	3.273	5.956	70.6	53.6	50.1	20.8	54.2	50	20.5	10	10	0.13	0	0.24	0.03	201	N/A
2024-03-05 20:23:30	00:08:03	Charge/CC	1.82	1.82	16.328	29.717	3.266	5.943	70.6	53.6	50.1	20.8	54.2	50.1	20.5	10	10	0.13	0	0.24	0.03	201	N/A
2024-03-05 20:23:31	00:08:04	Charge/CC	1.82	1.82	16.321	29.704	3.264	5.941	70.6	53.6	50.1	20.8	54.2	50.1	20.5	10	10	0.14	0	0.26	0.03	201	N/A
2024-03-05 20:23:32	00:08:05	Charge/CC	1.83	1.82	16.31	29.684	3.262	5.937	70.6	53.6	50.1	20.8	54.2	50.1	20.5	10	10	0.14	0	0.26	0.03	201	N/A
2024-03-05 20:23:33	00:08:06	Charge/CC	1.83	1.82	16.31	29.684	3.262	5.937	70.6	53.6	50.1	20.8	54.2	50.1	20.5	10	10	0.14	0	0.26	0.03	201	N/A
2024-03-05 20:23:34	00:08:07	Charge/CC	1.83	1.82	16.31	29.684	3.262	5.937	70.6	53.7	50.1	20.8	54.2	50.1	20.5	10	10	0.14	0	0.26	0.03	201	N/A
2024-03-05 20:23:35	00:08:08	Charge/CC	1.83	1.83	16.967	31.049	3.393	6.21	70.6	53.7	50.1	20.9	54.3	50.1	20.5	10	10	0.14	0	0.26	0.03	201	N/A
2024-03-05 20:23:36	00:08:09	Charge/CC	1.83	1.83	16.944	31.007	3.389	6.201	70.6	53.7	50.1	20.9	54.3	50.1	20.5	10	10	0.14	0	0.25	0.03	201	N/A
2024-03-05 20:23:37	00:08:10	Charge/CC	1.83	1.83	16.929	30.981	3.386	6.196	70.6	53.7	50.1	20.9	54.3	50.1	20.5	10	10	0.14	0	0.25	0.03	200	N/A
2024-03-05 20:23:38	00:08:11	Charge/CC	1.83	1.83	16.927	30.976	3.385	6.195	70.6	53.7	50.1	20.9	54.3	50.1	20.5	10	10	0.14	0	0.25	0.03	200	N/A
2024-03-05 20:23:39	00:08:12	Charge/CC	1.83	1.83	16.906	30.938	3.381	6.188	70.6	53.7	50.1	20.9	54.3	50.1	20.5	10	10	0.14	0	0.25	0.03	200	N/A
2024-03-05 20:23:40	00:08:13	Charge/CC	1.83	1.83	16.932	30.98	3.386	6.196	70.6	53.7	50.1	20.8	54.4	50.1	20.5	10	10	0.14	0	0.25	0.03	200	N/A
2024-03-05 20:23:41	00:08:14	Charge/CC	1.83	1.83	16.91	30.946	3.382	6.189	70.6	53.7	50.1	20.8	54.4	50.2	20.5	10	10	0.14	0	0.25	0.03	200	N/A
2024-03-05 20:23:42	00:08:15	Charge/CC	1.84	1.83	16.902	30.931	3.38	6.186	70.6	53.7	50.1	20.8	54.4	50.2	20.5	10	10	0.14	0	0.25	0.03	201	N/A
2024-03-05 20:23:43	00:08:16	Charge/CC	1.84	1.83	16.902	30.931	3.38	6.186	70.6	53.7	50.1	20.8	54.4	50.2	20.5	10	10	0.14	0	0.25	0.03	201	N/A
2024-03-05 20:23:44	00:08:17	Charge/CC	1.84	1.83	16.902	30.931	3.38	6.186	70.6	53.7	50.1	20.8	54.4	50.2	20.5	10	10	0.14	0	0.25	0.03	201	N/A
2024-03-05 20:23:45	00:08:18	Charge/CC	1.84	1.84	17.497	32.195	3.499	6.439	70.6	53.7	50.1	20.8	54.4	50.2	20.5	10	10	0.14	0	0.25	0.03	201	N/A
2024-03-05 20:23:46	00:08:19	Charge/CC	1.84	1.84	17.529	32.254	3.506	6.451	70.6	53.7	50.1	20.8	54.4	50.2	20.5	10	10	0.14	0	0.25	0.03	201	N/A
2024-03-05 20:23:47	00:08:20	Charge/CC	1.84	1.84	17.484	32.171	3.497	6.434	70.6	53.7	50.1	20.8	54.4	50.2	20.5	10	10	0.14	0	0.25	0.03	201	N/A
2024-03-05 20:23:48	00:08:21	Charge/CC	1.84	1.84	17.518	32.234	3.504	6.447	70.6	53.7	50.1	20.8	54.4	50.2	20.5	10	10	0.14	0	0.25	0.03	201	N/A
2024-03-05 20:23:49	00:08:22	Charge/CC	1.84	1.84	17.494	32.189	3.499	6.438	70.6	53.7	50.1	20.8	54.4	50.2	20.5	10	10	0.14	0	0.25	0.03	201	N/A
2024-03-05 20:23:50	00:08:23	Charge/CC	1.84	1.84	17.501	32.203	3.5	6.441	70.6	53.7	50.1	20.8	54.4	50.2	20.5	10	10	0.14	0	0.25	0.03	201	N/A
2024-03-05 20:23:51	00:08:24	Charge/CC	1.84	1.84	17.482	32.167	3.496	6.433	70.6	53.7	50.1	20.8	54.5	50.2	20.5	10	10	0.14	0	0.25	0.03	201	N/A
2024-03-05 20:23:52	00:08:25	Charge/CC	1.85	1.84	17.478	32.16	3.496	6.432	70.6	53.7	50.1	20.8	54.5	50.2	20.5	10	10	0.14	0	0.25	0.03	201	N/A
2024-03-05 20:23:53	00:08:26	Charge/CC	1.85	1.84	17.478	32.16	3.496	6.432	70.6	53.7	50.1	20.8	54.5	50.2	20.5	10	10	0.14	0	0.25	0.03	201	N/A
2024-03-05 20:23:54	00:08:27	Charge/CC	1.85	1.84	17.478	32.16	3.496	6.432	70.6	53.7	50.1	20.8	54.5	50.2	20.5	10	10	0.14	0	0.25	0.03	201	N/A
2024-03-05 20:23:55	00:08:28	Charge/CC	1.85	1.85	18.103	33.491	3.621	6.698	70.6	53.7	50.1	20.8	54.5	50.2	20.5	10	10	0.14	0	0.25	0.03	201	N/A
2024-03-05 20:23:56	00:08:29	Charge/CC	1.85	1.85	18.108	33.494	3.622	6.699	70.7	53.7	50.1	20.8	54.5	50.2	20.5	10	10	0.14	0	0.25	0.03	201	N/A
2024-03-05 20:23:57	00:08:30	Charge/CC	1.85	1.85	18.067	33.425	3.613	6.685	70.7	53.7	50.1	20.8	54.6	50.2	20.5	10	10	0.14	0	0.25	0.03	201	N/A
2024-03-05 20:23:58	00:08:31	Charge/CC	1.85	1.85	18.088	33.463	3.618	6.693	70.7	53.7	50.1	20.8	54.6	50.2	20.5	10	10	0.14	0	0.26	0.03	201	N/A
2024-03-05 20:23:59	00:08:32	Charge/CC	1.85	1.85	18.037	33.363	3.607	6.673	70.7	53.7	50.1	20.8	54.6	50.2	20.5	10	10	0.14	0	0.26	0.03	201	N/A
2024-03-05 20:24:00	00:08:33	Charge/CC	1.85	1.85	18.059	33.41	3.612	6.682	70.7	53.7	50.1	20.8	54.6	50.2	20.5	10	10	0.14	0	0.26	0.03	201	N/A
2024-03-05 20:24:01	00:08:34	Charge/CC	1.85	1.85	18.023	33.343	3.605	6.669	70.7	53.7	50.1	20.8	54.6	50.2	20.5	10	10	0.14	0	0.26	0.03	201	N/A
2024-03-05 20:24:02	00:08:35	Charge/CC	1.86	1.85	18.061	33.414	3.612	6.683	70.7	53.7	50.1	20.9	54.7	50.2	20.5	10	10	0.14	0	0.26	0.03	201	N/A
2024-03-05 20:24:03	00:08:36	Charge/CC	1.86	1.85	18.061	33.414	3.612	6.683	70.7	53.7	50.1	20.9	54.7	50.2	20.5	10	10	0.14	0	0.26	0.03	201	N/A
2024-03-05 20:24:04	00:08:37	Charge/CC	1.86	1.85	18.061	33.414	3.612	6.683	70.7	53.7	50.1	20.9	54.7	50.2	20.5	10	10	0.14	0	0.25	0.03	201	N/A
2024-03-05 20:24:05	00:08:38	Charge/CC	1.86	1.86	18.62	34.633	3.724	6.927	70.7	53.7	50.1	20.9	54.7	50.2	20.5	10	10	0.14	0	0.25	0.03	201	N/A
2024-03-05 20:24:06	00:08:39	Charge/CC	1.86	1.86	18.672	34.731	3.734	6.946	70.7	53.7	50.1	20.9	54.7	50.2	20.5	10	10	0.14	0	0.25	0.03	201	N/A
2024-03-05 20:24:07	00:08:40	Charge/CC	1.86	1.86	18.62	34.635	3.724	6.927	70.7	53.7	50.1	20.8	54.7	50.2	20.5	10	10	0.14	0	0.25	0.03	201	N/A
2024-03-05 20:24:08	00:08:41	Charge/CC	1.86	1.86	18.584	34.567	3.717	6.913	70.7	53.7	50.1	20.8	54.8	50.2	20.6	10	10	0.14	0	0.25	0.03	201	N/A
2024-03-05 20:24:09	00:08:42	Charge/CC	1.86	1.86	18.521	34.45	3.704	6.89	70.7	53.7	50.1	20.8	54.8	50.2	20.6	10	10	0.14	0	0.25	-0.01	201	N/A
2024-03-05 20:24:10	00:08:43	Charge/CC	1.86	1.86	18.546	34.496	3.709	6.899	70.7	53.7	50.1	20.8	54.8	50.2	20.6	10	10	0.14	0	0.25	-0.01	201	N/A
2024-03-05 20:24:11	00:08:44	Charge/CC	1.86	1.86	18.501	34.414	3.7	6.883	70.7	53.7	50.1	20.8	54.8	50.2	20.6	10	10	0.14	0	0.25	-0.01	201	N/A
2024-03-05 20:24:12	00:08:45	Charge/CC	1.87	1.86	18.517	34.443	3.703	6.889	70.7	53.7	50.1	20.8	54.8	50.2	20.6	10	10	0.14	0	0.25	-0.01	201	N/A
2024-03-05 20:24:13	00:08:46	Charge/CC	1.87	1.86	18.517	34.443	3.703	6.889	70.7	53.7	50.1	20.8	54.9	50.1	20.6	10	10	0.14	0	0.25	-0.01	201	N/A
2024-03-05 20:24:14	00:08:47	Charge/CC	1.87	1.86	18.517	34.443	3.703	6.889	70.7	53.7	50.1	20.8	54.9	50.1	20.6	10	10	0.14	0	0.25	-0.01	201	N/A
2024-03-05 20:24:15	00:08:48	Charge/CC	1.87	1.86	18.523	34.454	3.705	6.891	70.7	53.7	50.1	20.8	54.9	50.1	20.6	10	10	0.14	0	0.23	-0.02	201	N/A
2024-03-05 20:24:16	00:08:49	Charge/CC	1.87	1.87	19.106	35.73	3.821	7.146	70.7	53.7	50.1	20.8	54.9	50.1	20.6	10	10	0.14	0	0.23	-0.02	201	N/A
2024-03-05 20:24:17	00:08:50	Charge/CC	1.87	1.87	19.132	35.778	3.826	7.156	70.7	53.7	50.1	20.8	54.9	50.1	20.6	10	10	0.14	0	0.23	-0.02	201	N/A
2024-03-05 20:24:18	00:08:51	Charge/CC	1.87	1.87	19.098	35.715	3.82	7.143	70.7	53.7	50.1	20.8	55	50.1	20.6	10	10	0.14	0	0.23	-0.02	201	N/A
2024-03-05 20:24:19	00:08:52	Charge/CC	1.87	1.87	19.055	35.635	3.811	7.127	70.7	53.7	50.1	20.8	55	50.1	20.6	10	10	0.14	0	0.23	-0.02	201	N/A
2024-03-05 20:24:20	00:08:53	Charge/CC	1.87	1.87	19.1	35.718	3.82	7.144	70.7	53.7	50.1	20.8	55	50.1	20.6	10	10	0.14	0	0.21	-0.02	201	N/A
2024-03-05 20:24:21	00:08:54	Charge/CC	1.87	1.87	19.095	35.71	3.819	7.142	70.7	53.7	50.1	20.8	55	50.1	20.6	10	10	0.14	0	0.21	-0.02	201	N/A
2024-03-05 20:24:22	00:08:55	Charge/CC	1.88	1.87	19.088	35.696	3.818	7.139	70.7	53.7	50.1	20.8	55	50.1	20.6	10	10	0.14	0	0.21	-0.02	201	N/A
2024-03-05 20:24:23	00:08:56	Charge/CC	1.88	1.87	19.088	35.696	3.818	7.139	70.6	53.7	50	20.8	55	50.1	20.6	10	10	0.14	0	0.21	-0.02	201	N/A
2024-03-05 20:24:24	00:08:57	Charge/CC	1.88	1.87	19.088	35.696	3.818	7.139	70.6	53.7	50	20.8	55.1	50.1	20.6	10	10	0.14	0	0.21	-0.02	201	N/A
2024-03-05 20:24:25	00:08:58	Charge/CC	1.88	1.88	19.697	37.032	3.939	7.406	70.6	53.7	50	20.8	55.1	50.1	20.6	10	10	0.15	0	0.22	-0.02	201	N/A
2024-03-05 20:24:26	00:08:59	Charge/CC	1.88	1.88	19.684	37.008	3.937	7.402	70.6	53.7	50	20.8	55.1	50.1	20.6	10	10	0.15	0	0.22	-0.01	200	N/A
2024-03-05 20:24:27	00:09:00	Charge/CC	1.88	1.88	19.669	36.98	3.934	7.396	70.6	53.7	50	20.8	55.1	50.1	20.6	10	10	0.15	0	0.22	-0.01	200	N/A
2024-03-05 20:24:28	00:09:01	Charge/CC	1.88	1.88	19.701	37.039	3.94	7.408	70.6	53.7	50	20.8	55.1	50.1	20.6	10	10	0.15	0	0.22	-0.01	200	N/A
2024-03-05 20:24:29	00:09:02	Charge/CC	1.88	1.88	19.676	36.992	3.935	7.398	70.6	53.7	49.9	20.8	55.2	50.1	20.6	10	10	0.15	0	0.22	-0.01	200	N/A
2024-03-05 20:24:30	00:09:03	Charge/CC	1.88	1.88	19.698	37.034	3.94	7.407	70.6	53.7	49.9	20.8	55.2	50.1	20.5	10	10	0.14	0	0.22	-0.01	200	N/A
2024-03-05 20:24:31	00:09:04	Charge/CC	1.88	1.88	19.701	37.04	3.94	7.408	70.6	53.7	49.9	20.8	55.2	50.1	20.5	10	10	0.14	0	0.22	0	201	N/A
2024-03-05 20:24:32	00:09:05	Charge/CC	1.89	1.88	19.647	36.938	3.929	7.388	70.6	53.7	49.9	20.8	55.2	50.1	20.5	10	10	0.14	0	0.22	0	201	N/A
2024-03-05 20:24:33	00:09:06	Charge/CC	1.89	1.88	19.647	36.938	3.929	7.388	70.6	53.7	49.9	20.8	55.2	50.1	20.5	10	10	0.14	0	0.22	0	201	N/A
2024-03-05 20:24:34	00:09:07	Charge/CC	1.89	1.88	19.647	36.938	3.929	7.388	70.6	53.7	49.9	20.8	55.2	50.1	20.5	10	10	0.14	0	0.22	0	201	N/A
2024-03-05 20:24:35	00:09:08	Charge/CC	1.89	1.89	20.281	38.326	4.056	7.665	70.6	53.7	49.9	20.8	55.2	50.1	20.5	10	10	0.14	0	0.22	0	201	N/A
2024-03-05 20:24:36	00:09:09	Charge/CC	1.89	1.89	20.288	38.339	4.058	7.668	70.6	53.7	49.9	20.8	55.2	50.1	20.5	10	10	0.14	0	0.23	0	201	N/A
2024-03-05 20:24:37	00:09:10	Charge/CC	1.89	1.89	20.251	38.269	4.05	7.654	70.6	53.7	49.9	20.8	55.2	50.1	20.5	10	10	0.14	0	0.23	0.01	201	N/A
2024-03-05 20:24:38	00:09:11	Charge/CC	1.89	1.89	20.26	38.287	4.052	7.657	70.6	53.7	49.9	20.8	55.2	50.1	20.5	10	10	0.14	0	0.23	0.01	201	N/A
2024-03-05 20:24:39	00:09:12	Charge/CC	1.89	1.89	20.272	38.31	4.054	7.662	70.6	53.7	49.9	20.8	55.2	50.1	20.5	10	10	0.14	0	0.23	0.01	201	N/A
2024-03-05 20:24:40	00:09:13	Charge/CC	1.89	1.89	20.27	38.305	4.054	7.661	70.6	53.6	50	20.8	55.3	50.1	20.5	10	10	0.14	0	0.23	0.01	201	N/A
2024-03-05 20:24:41	00:09:14	Charge/CC	1.89	1.89	20.25	38.267	4.05	7.653	70.6	53.6	50	20.8	55.3	50.1	20.5	10	10	0.15	0	0.23	0.01	201	N/A
2024-03-05 20:24:42	00:09:15	Charge/CC	1.9	1.89	20.242	38.253	4.048	7.651	70.6	53.6	50	20.8	55.3	50.1	20.5	10	10	0.15	0	0.24	0.02	201	N/A
2024-03-05 20:24:43	00:09:16	Charge/CC	1.9	1.89	20.242	38.253	4.048	7.651	70.6	53.6	50	20.8	55.3	50.1	20.5	10	10	0.15	0	0.24	0.02	201	N/A
2024-03-05 20:24:44	00:09:17	Charge/CC	1.9	1.89	20.242	38.253	4.048	7.651	70.6	53.6	50	20.8	55.3	50.1	20.5	10	10	0.15	0	0.24	0.02	201	N/A
2024-03-05 20:24:45	00:09:18	Charge/CC	1.9	1.9	20.84	39.591	4.168	7.918	70.7	53.6	50	20.8	55.3	50.1	20.5	10	10	0.15	0	0.24	0.02	201	N/A
2024-03-05 20:24:46	00:09:19	Charge/CC	1.9	1.9	20.846	39.603	4.169	7.921	70.7	53.6	50	20.8	55.3	50	20.5	10	10	0.15	0	0.24	0.02	201	N/A
2024-03-05 20:24:47	00:09:20	Charge/CC	1.9	1.9	20.846	39.602	4.169	7.92	70.7	53.6	50	20.8	55.3	50	20.5	10	10	0.15	0	0.24	0.03	201	N/A
2024-03-05 20:24:48	00:09:21	Charge/CC	1.9	1.9	20.856	39.621	4.171	7.924	70.7	53.6	50	20.8	55.3	50	20.5	10	10	0.15	0	0.24	0.03	201	N/A
2024-03-05 20:24:49	00:09:22	Charge/CC	1.9	1.9	20.823	39.56	4.165	7.912	70.7	53.6	50	20.8	55.3	50	20.5	10	10	0.15	0	0.24	0.03	201	N/A
2024-03-05 20:24:50	00:09:23	Charge/CC	1.9	1.9	20.801	39.516	4.16	7.903	70.7	53.6	50	20.8	55.3	50	20.5	10	10	0.15	0	0.24	0.03	201	N/A
2024-03-05 20:24:51	00:09:24	Charge/CC	1.9	1.9	20.772	39.462	4.154	7.892	70.7	53.6	50	20.8	55.4	50.1	20.5	10	10	0.15	0	0.24	0.03	201	N/A
2024-03-05 20:24:52	00:09:25	Charge/CC	1.91	1.9	20.783	39.482	4.157	7.896	70.7	53.6	50	20.8	55.4	50.1	20.5	10	10	0.15	0	0.24	0.03	201	N/A
2024-03-05 20:24:53	00:09:26	Charge/CC	1.91	1.9	20.783	39.482	4.157	7.896	70.7	53.6	50	20.8	55.4	50.1	20.5	10	10	0.15	0	0.26	0.03	207	N/A
2024-03-05 20:24:54	00:09:27	Charge/CC	1.91	1.9	20.783	39.482	4.157	7.896	70.7	53.6	50	20.8	55.4	50.1	20.5	10	10	0.15	0	0.26	0.03	207	N/A
2024-03-05 20:24:55	00:09:28	Charge/CC	1.91	1.91	21.422	40.911	4.284	8.182	70.7	53.6	50	20.8	55.4	50.1	20.5	10	10	0.15	0	0.26	0.03	207	N/A
2024-03-05 20:24:56	00:09:29	Charge/CC	1.91	1.91	21.38	40.832	4.276	8.166	70.7	53.5	50	20.8	55.4	50.1	20.5	10	10	0.15	0	0.26	0.03	207	N/A
2024-03-05 20:24:57	00:09:30	Charge/CC	1.91	1.91	21.375	40.822	4.275	8.164	70.7	53.5	50	20.8	55.4	50.1	20.5	10	10	0.15	0	0.26	0.03	207	N/A
2024-03-05 20:24:58	00:09:31	Charge/CC	1.91	1.91	21.392	40.853	4.278	8.171	70.7	53.5	50	20.8	55.4	50.1	20.5	10	10	0.15	0	0.25	0.03	207	N/A
2024-03-05 20:24:59	00:09:32	Charge/CC	1.91	1.91	21.362	40.796	4.272	8.159	70.7	53.5	50	20.8	55.4	50.1	20.5	10	10	0.15	0	0.25	0.03	205	N/A
2024-03-05 20:25:00	00:09:33	Charge/CC	1.91	1.91	21.307	40.692	4.261	8.138	70.7	53.5	50	20.8	55.4	50.1	20.5	10	10	0.15	0	0.25	0.03	205	N/A
2024-03-05 20:25:01	00:09:34	Charge/CC	1.91	1.91	21.327	40.73	4.265	8.146	70.6	53.4	50	20.8	55.4	50.1	20.5	10	10	0.15	0	0.25	0.03	205	N/A
2024-03-05 20:25:02	00:09:35	Charge/CC	1.92	1.909	21.298	40.667	4.26	8.133	70.6	53.4	50	20.9	55.4	50.1	20.5	10	10	0.15	0	0.25	0.03	205	N/A
2024-03-05 20:25:03	00:09:36	Charge/CC	1.92	1.909	21.298	40.667	4.26	8.133	70.6	53.4	50	20.9	55.4	50.1	20.5	10	10	0.15	0	0.25	0.03	205	N/A
2024-03-05 20:25:04	00:09:37	Charge/CC	1.92	1.909	21.298	40.667	4.26	8.133	70.6	53.4	50	20.9	55.4	50.1	20.5	10	10	0.15	0	0.24	0.03	208	N/A
2024-03-05 20:25:05	00:09:38	Charge/CC	1.92	1.919	21.988	42.206	4.398	8.441	70.6	53.4	50	20.9	55.4	50.1	20.5	10	10	0.15	0	0.24	0.03	208	N/A
2024-03-05 20:25:06	00:09:39	Charge/CC	1.92	1.92	21.915	42.072	4.383	8.414	70.6	53.4	50	20.9	55.4	50.1	20.5	10	10	0.15	0	0.24	0.03	208	N/A
2024-03-05 20:25:07	00:09:40	Charge/CC	1.92	1.919	21.895	42.026	4.379	8.405	70.6	53.4	50	20.8	55.5	50.1	20.5	10	10	0.15	0	0.24	0.03	208	N/A
2024-03-05 20:25:08	00:09:41	Charge/CC	1.92	1.92	21.892	42.028	4.378	8.406	70.6	53.4	50	20.8	55.5	50.1	20.5	10	10	0.15	0	0.24	0.03	208	N/A
2024-03-05 20:25:09	00:09:42	Charge/CC	1.92	1.92	21.888	42.021	4.378	8.404	70.6	53.4	50	20.8	55.5	50.1	20.5	10	10	0.15	0	0.25	0.03	206	N/A
2024-03-05 20:25:10	00:09:43	Charge/CC	1.92	1.92	21.88	42.006	4.376	8.401	70.6	53.4	50	20.8	55.5	50.1	20.5	10	10	0.15	0	0.25	0.03	206	N/A
2024-03-05 20:25:11	00:09:44	Charge/CC	1.92	1.92	21.875	41.995	4.375	8.399	70.6	53.4	50	20.8	55.5	50.1	20.5	10	10	0.15	0	0.25	0.03	206	N/A
2024-03-05 20:25:12	00:09:45	Charge/CC	1.93	1.92	21.884	42.013	4.377	8.403	70.6	53.4	50	20.8	55.5	50.1	20.5	10	10	0.15	0	0.25	0.03	206	N/A
2024-03-05 20:25:13	00:09:46	Charge/CC	1.93	1.92	21.884	42.013	4.377	8.403	70.6	53.4	50	20.8	55.6	50.1	20.5	10	10	0.15	0	0.25	0.03	206	N/A
2024-03-05 20:25:14	00:09:47	Charge/CC	1.93	1.92	21.884	42.013	4.377	8.403	70.6	53.4	50	20.8	55.6	50.1	20.5	10	10	0.15	0	0.25	0.03	206	N/A
2024-03-05 20:25:15	00:09:48	Charge/CC	1.93	1.92	21.821	41.892	4.364	8.378	70.6	53.4	50	20.8	55.6	50.1	20.5	10	10	0.15	0	0.25	0.03	204	N/A
2024-03-05 20:25:16	00:09:49	Charge/CC	1.93	1.93	22.448	43.32	4.49	8.664	70.6	53.4	50	20.8	55.6	50.1	20.5	10	10	0.15	0	0.25	0.03	204	N/A
2024-03-05 20:25:17	00:09:50	Charge/CC	1.93	1.93	22.414	43.255	4.483	8.651	70.6	53.4	50	20.8	55.6	50.1	20.5	10	10	0.15	0	0.25	0.03	204	N/A
2024-03-05 20:25:18	00:09:51	Charge/CC	1.93	1.93	22.398	43.223	4.48	8.645	70.6	53.3	50	20.8	55.6	50.1	20.5	10	10	0.15	0	0.25	0.03	204	N/A
2024-03-05 20:25:19	00:09:52	Charge/CC	1.93	1.929	22.417	43.253	4.483	8.651	70.6	53.3	50	20.8	55.6	50	20.5	10	10	0.15	0	0.25	0.03	204	N/A
2024-03-05 20:25:20	00:09:53	Charge/CC	1.93	1.93	22.419	43.265	4.484	8.653	70.6	53.3	50	20.8	55.6	50	20.5	10	10	0.15	0	0.26	0.03	204	N/A
2024-03-05 20:25:21	00:09:54	Charge/CC	1.93	1.93	22.347	43.125	4.469	8.625	70.6	53.3	50	20.8	55.6	50	20.5	10	10	0.15	0	0.26	0.03	204	N/A
2024-03-05 20:25:22	00:09:55	Charge/CC	1.94	1.929	22.365	43.153	4.473	8.631	70.6	53.3	50	20.8	55.6	50	20.5	10	10	0.15	0	0.26	0.03	204	N/A
2024-03-05 20:25:23	00:09:56	Charge/CC	1.94	1.929	22.365	43.153	4.473	8.631	70.6	53.3	50	20.8	55.6	50	20.5	10	10	0.15	0	0.26	0.03	204	N/A
2024-03-05 20:25:24	00:09:57	Charge/CC	1.94	1.929	22.365	43.153	4.473	8.631	70.6	53.3	50	20.8	55.5	50	20.5	10	10	0.15	0	0.26	0.03	204	N/A
2024-03-05 20:25:25	00:09:58	Charge/CC	1.94	1.94	22.919	44.459	4.584	8.892	70.6	53.3	50	20.8	55.5	50	20.5	10	10	0.15	0	0.26	0.03	204	N/A
2024-03-05 20:25:26	00:09:59	Charge/CC	1.94	1.94	22.883	44.39	4.577	8.878	70.6	53.3	50	20.8	55.5	50	20.5	10	10	0.15	0	0.26	0.03	208	N/A
2024-03-05 20:25:27	00:10:00	Charge/CC	1.94	1.939	22.88	44.375	4.576	8.875	70.6	53.3	50	20.8	55.5	50	20.5	10	10	0.15	0	0.26	0.03	208	N/A
2024-03-05 20:25:28	00:10:01	Charge/CC	1.94	1.94	22.94	44.5	4.588	8.9	70.6	53.3	50	20.8	55.5	50	20.5	10	10	0.15	0	0.26	0.03	208	N/A
2024-03-05 20:25:29	00:10:02	Charge/CC	1.94	1.94	22.884	44.391	4.577	8.878	70.6	53.2	50	20.9	55.5	50.1	20.5	10	10	0.15	0	0.26	0.03	208	N/A
2024-03-05 20:25:30	00:10:03	Charge/CC	1.94	1.94	22.917	44.455	4.583	8.891	70.6	53.2	50	20.9	55.5	50.1	20.5	10	10	0.16	0	0.26	0.03	208	N/A
2024-03-05 20:25:31	00:10:04	Charge/CC	1.94	1.94	22.869	44.362	4.574	8.872	70.6	53.2	50	20.9	55.5	50.1	20.5	10	10	0.16	0	0.26	0.03	204	N/A
2024-03-05 20:25:32	00:10:05	Charge/CC	1.95	1.94	22.86	44.345	4.572	8.869	70.6	53.2	50	20.9	55.5	50.1	20.5	10	10	0.16	0	0.26	0.03	204	N/A
2024-03-05 20:25:33	00:10:06	Charge/CC	1.95	1.94	22.86	44.345	4.572	8.869	70.6	53.2	50	20.9	55.5	50.1	20.5	10	10	0.16	0	0.26	0.03	204	N/A
2024-03-05 20:25:34	00:10:07	Charge/CC	1.95	1.94	22.86	44.345	4.572	8.869	70.6	53.2	50	20.9	55.5	50.1	20.5	10	10	0.16	0	0.26	0.03	204	N/A
2024-03-05 20:25:35	00:10:08	Charge/CC	1.95	1.95	23.408	45.643	4.682	9.129	70.6	53.2	50	20.9	55.5	50.1	20.5	10	10	0.16	0	0.26	0.03	204	N/A
2024-03-05 20:25:36	00:10:09	Charge/CC	1.95	1.95	23.446	45.708	4.689	9.142	70.6	53.2	50	20.9	55.5	50.1	20.5	10	10	0.16	0	0.26	0.03	204	N/A
2024-03-05 20:25:37	00:10:10	Charge/CC	1.95	1.95	23.452	45.728	4.69	9.146	70.6	53.2	50	20.9	55.5	50.1	20.5	10	10	0.16	0	0.26	0.03	204	N/A
2024-03-05 20:25:38	00:10:11	Charge/CC	1.95	1.95	23.431	45.688	4.686	9.138	70.6	53.2	50	20.9	55.5	50.1	20.5	10	10	0.16	0	0.26	0.03	204	N/A
2024-03-05 20:25:39	00:10:12	Charge/CC	1.95	1.95	23.389	45.605	4.678	9.121	70.6	53.1	50	20.9	55.5	50.1	20.5	10	10	0.16	0	0.26	0.03	204	N/A
2024-03-05 20:25:40	00:10:13	Charge/CC	1.95	1.95	23.384	45.596	4.677	9.119	70.6	53.1	50	20.8	55.6	50	20.5	10	10	0.16	0	0.26	0.03	204	N/A
2024-03-05 20:25:41	00:10:14	Charge/CC	1.95	1.95	23.404	45.627	4.681	9.125	70.6	53.1	50	20.8	55.6	50	20.5	10	10	0.15	0	0.26	0.03	204	N/A
2024-03-05 20:25:42	00:10:15	Charge/CC	1.96	1.95	23.383	45.593	4.677	9.119	70.6	53.1	50	20.8	55.6	50	20.5	10	10	0.15	0	0.25	0.03	204	N/A
2024-03-05 20:25:43	00:10:16	Charge/CC	1.96	1.95	23.383	45.593	4.677	9.119	70.6	53.1	50	20.8	55.6	50	20.5	10	10	0.15	0	0.25	0.03	204	N/A
2024-03-05 20:25:44	00:10:17	Charge/CC	1.96	1.95	23.383	45.593	4.677	9.119	70.6	53.1	50	20.8	55.6	50	20.5	10	10	0.15	0	0.25	0.03	204	N/A
2024-03-05 20:25:45	00:10:18	Charge/CC	1.96	1.96	23.965	46.969	4.793	9.394	70.6	53	50	20.8	55.6	50	20.5	10	10	0.15	0	0.25	0.03	204	N/A
2024-03-05 20:25:46	00:10:19	Charge/CC	1.96	1.96	23.979	46.995	4.796	9.399	70.6	53	50	20.8	55.6	50	20.5	10	10	0.15	0	0.25	0.03	204	N/A
2024-03-05 20:25:47	00:10:20	Charge/CC	1.96	1.96	23.966	46.97	4.793	9.394	70.6	53	50	20.8	55.6	50	20.5	10	10	0.16	0	0.26	0.03	204	N/A
2024-03-05 20:25:48	00:10:21	Charge/CC	1.96	1.96	23.925	46.89	4.785	9.378	70.6	53	50	20.8	55.6	50	20.5	10	10	0.16	0	0.26	0.03	207	N/A
2024-03-05 20:25:49	00:10:22	Charge/CC	1.96	1.96	23.9	46.841	4.78	9.368	70.6	53	50	20.8	55.6	50	20.5	10	10	0.16	0	0.26	0.03	207	N/A
2024-03-05 20:25:50	00:10:23	Charge/CC	1.96	1.96	23.967	46.971	4.793	9.394	70.6	53	50	20.8	55.6	50	20.5	10	10	0.16	0	0.26	0.03	207	N/A
2024-03-05 20:25:51	00:10:24	Charge/CC	1.96	1.96	23.891	46.824	4.778	9.365	70.6	53	50	20.8	55.6	50.1	20.5	10	10	0.16	0	0.26	0.03	207	N/A
2024-03-05 20:25:52	00:10:25	Charge/CC	1.97	1.96	23.919	46.877	4.784	9.375	70.6	53	50	20.8	55.6	50.1	20.5	10	10	0.16	0	0.26	0.03	207	N/A
2024-03-05 20:25:53	00:10:26	Charge/CC	1.97	1.96	23.919	46.877	4.784	9.375	70.6	53	50	20.8	55.6	50.1	20.5	10	10	0.16	0	0.25	0.03	208	N/A
2024-03-05 20:25:54	00:10:27	Charge/CC	1.97	1.96	23.919	46.877	4.784	9.375	70.6	53	50	20.8	55.6	50.1	20.5	10	10	0.16	0	0.25	0.03	208	N/A
2024-03-05 20:25:55	00:10:28	Charge/CC	1.97	1.96	23.835	46.713	4.767	9.343	70.6	53	50	20.8	55.6	50.1	20.5	10	10	0.16	0	0.25	0.03	208	N/A
2024-03-05 20:25:56	00:10:29	Charge/CC	1.97	1.97	24.41	48.085	4.882	9.617	70.6	52.9	50	20.9	55.6	50.1	20.5	10	10	0.16	0	0.25	0.03	208	N/A
2024-03-05 20:25:57	00:10:30	Charge/CC	1.97	1.97	24.472	48.198	4.894	9.64	70.6	52.9	50	20.9	55.6	50	20.5	10	10	0.16	0	0.25	0.03	208	N/A
2024-03-05 20:25:58	00:10:31	Charge/CC	1.97	1.97	24.428	48.12	4.886	9.624	70.6	52.9	50	20.9	55.6	50	20.5	10	10	0.16	0	0.26	0.03	206	N/A
2024-03-05 20:25:59	00:10:32	Charge/CC	1.97	1.97	24.403	48.071	4.881	9.614	70.6	52.9	50	20.9	55.6	50	20.5	10	10	0.16	0	0.26	0.03	206	N/A
2024-03-05 20:26:00	00:10:33	Charge/CC	1.97	1.97	24.358	47.982	4.872	9.596	70.6	52.9	50	20.9	55.6	50	20.5	10	10	0.16	0	0.26	0.03	206	N/A
2024-03-05 20:26:01	00:10:34	Charge/CC	1.97	1.97	24.389	48.043	4.878	9.609	70.6	52.8	50.1	20.9	55.6	50	20.5	10	10	0.16	0	0.26	0.03	206	N/A
2024-03-05 20:26:02	00:10:35	Charge/CC	1.98	1.97	24.383	48.031	4.877	9.606	70.6	52.8	50.1	20.8	55.6	50	20.5	10	10	0.16	0	0.26	0.03	206	N/A
2024-03-05 20:26:03	00:10:36	Charge/CC	1.98	1.97	24.383	48.031	4.877	9.606	70.6	52.8	50.1	20.8	55.6	50	20.5	10	10	0.16	0	0.25	0.03	206	N/A
2024-03-05 20:26:04	00:10:37	Charge/CC	1.98	1.97	24.383	48.031	4.877	9.606	70.6	52.8	50.1	20.8	55.6	50	20.5	10	10	0.16	0	0.25	0.03	204	N/A
2024-03-05 20:26:05	00:10:38	Charge/CC	1.98	1.98	24.995	49.489	4.999	9.898	70.6	52.8	50.1	20.8	55.6	50	20.5	10	10	0.16	0	0.25	0.03	204	N/A
2024-03-05 20:26:06	00:10:39	Charge/CC	1.98	1.98	24.952	49.402	4.99	9.88	70.6	52.8	50.1	20.8	55.6	50	20.5	10	10	0.16	0	0.25	0.03	204	N/A
2024-03-05 20:26:07	00:10:40	Charge/CC	1.98	1.98	24.915	49.33	4.983	9.866	70.6	52.7	50	20.8	55.6	50	20.5	10	10	0.16	0	0.25	0.03	204	N/A
2024-03-05 20:26:08	00:10:41	Charge/CC	1.98	1.98	24.906	49.311	4.981	9.862	70.6	52.7	50	20.8	55.6	49.9	20.5	10	10	0.16	0	0.25	0.03	204	N/A
2024-03-05 20:26:09	00:10:42	Charge/CC	1.98	1.98	24.928	49.355	4.986	9.871	70.6	52.7	50	20.8	55.6	49.9	20.5	10	10	0.16	0	0.25	0.03	204	N/A
2024-03-05 20:26:10	00:10:43	Charge/CC	1.98	1.98	24.849	49.198	4.97	9.84	70.6	52.7	50	20.8	55.6	49.9	20.5	10	10	0.16	0	0.25	0.03	204	N/A
2024-03-05 20:26:11	00:10:44	Charge/CC	1.98	1.98	24.865	49.23	4.973	9.846	70.6	52.7	50	20.8	55.6	49.9	20.5	10	10	0.16	0	0.25	0.03	204	N/A
2024-03-05 20:26:12	00:10:45	Charge/CC	1.99	1.98	24.915	49.33	4.983	9.866	70.6	52.6	50.1	20.8	55.6	49.9	20.5	10	10	0.16	0	0.25	0.03	204	N/A
2024-03-05 20:26:13	00:10:46	Charge/CC	1.99	1.98	24.915	49.33	4.983	9.866	70.6	52.6	50.1	20.8	55.6	50	20.5	10	10	0.16	0	0.25	0.03	204	N/A
2024-03-05 20:26:14	00:10:47	Charge/CC	1.99	1.98	24.915	49.33	4.983	9.866	70.6	52.6	50.1	20.8	55.6	50	20.5	10	10	0.16	0	0.26	0.03	204	N/A
2024-03-05 20:26:15	00:10:48	Charge/CC	1.99	1.99	25.412	50.567	5.082	10.113	70.6	52.6	50.1	20.8	55.6	50	20.5	10	10	0.16	0	0.26	0.03	205	N/A
2024-03-05 20:26:16	00:10:49	Charge/CC	1.99	1.99	25.415	50.574	5.083	10.115	70.6	52.6	50.1	20.8	55.6	50	20.5	10	10	0.16	0	0.26	0.03	205	N/A
2024-03-05 20:26:17	00:10:50	Charge/CC	1.99	1.99	25.435	50.604	5.087	10.121	70.6	52.6	50.1	20.8	55.6	50	20.5	10	10	0.16	0	0.26	0.03	205	N/A
2024-03-05 20:26:18	00:10:51	Charge/CC	1.99	1.99	25.403	50.55	5.081	10.11	70.6	52.6	50	20.9	55.6	50.1	20.5	10	10	0.16	0	0.26	0.03	205	N/A
2024-03-05 20:26:19	00:10:52	Charge/CC	1.99	1.99	25.357	50.457	5.071	10.091	70.6	52.6	50	20.9	55.6	50.1	20.5	10	10	0.16	0	0.26	0.03	205	N/A
2024-03-05 20:26:20	00:10:53	Charge/CC	1.99	1.99	25.375	50.494	5.075	10.099	70.6	52.6	50	20.9	55.6	50.1	20.5	10	10	0.16	0	0.25	0.03	206	N/A
2024-03-05 20:26:21	00:10:54	Charge/CC	1.99	1.99	25.383	50.51	5.077	10.102	70.6	52.6	50	20.9	55.6	50.1	20.5	10	10	0.16	0	0.25	0.03	206	N/A
2024-03-05 20:26:22	00:10:55	Charge/CC	2	1.99	25.356	50.456	5.071	10.091	70.6	52.6	50	20.9	55.6	50.1	20.5	10	10	0.16	0	0.25	0.03	206	N/A
2024-03-05 20:26:23	00:10:56	Charge/CC	2	1.99	25.356	50.456	5.071	10.091	70.6	52.5	50	20.8	55.6	50.1	20.5	10	10	0.16	0	0.25	0.03	206	N/A
2024-03-05 20:26:24	00:10:57	Charge/CC	2	1.99	25.356	50.456	5.071	10.091	70.6	52.5	50	20.8	55.6	50	20.5	10	10	0.16	0	0.25	0.03	206	N/A
2024-03-05 20:26:25	00:10:58	Charge/CC	2	2	25.854	51.697	5.171	10.339	70.6	52.5	50	20.8	55.6	50	20.5	10	10	0.16	0	0.26	0.03	206	N/A
2024-03-05 20:26:26	00:10:59	Charge/CC	2	2	25.907	51.812	5.181	10.362	70.6	52.5	50	20.8	55.6	50	20.5	10	10	0.16	0	0.26	0.03	206	N/A
2024-03-05 20:26:27	00:11:00	Charge/CC	2	2	25.852	51.703	5.17	10.341	70.6	52.5	50	20.8	55.6	50	20.5	10	10	0.16	0	0.26	0.03	206	N/A
2024-03-05 20:26:28	00:11:01	Charge/CC	2	2	25.801	51.591	5.16	10.318	70.6	52.4	50	20.8	55.6	50	20.5	10	10	0.16	0	0.26	0.03	206	N/A
2024-03-05 20:26:29	00:11:02	Charge/CC	2	2	25.817	51.622	5.163	10.324	70.6	52.4	50	20.8	55.5	50.1	20.5	10	10	0.16	0	0.26	0.03	206	N/A
2024-03-05 20:26:30	00:11:03	Charge/CC	2	2	25.86	51.71	5.172	10.342	70.6	52.4	50	20.8	55.5	50.1	20.5	10	10	0.16	0	0.26	0.03	206	N/A
2024-03-05 20:26:31	00:11:04	Charge/CC	2	2	25.811	51.611	5.162	10.322	70.6	52.4	50	20.8	55.5	50.1	20.5	10	10	0.16	0	0.26	0.03	208	N/A
2024-03-05 20:26:32	00:11:05	Charge/CC	2	2	25.769	51.526	5.154	10.305	70.6	52.4	50	20.8	55.5	50.1	20.5	10	10	0.16	0	0.26	0.03	208	N/A

## Sheet: x-PDB-4-F5-SEBS WE cell
Test Start Time :	2023-12-15 11:44:58
Cell Square :	5
Test Cycle :	4_8
Test Scenario :	231208 - WE method(10s) - 50A.scn
Date/Time	CycleTime	Loader	Loader SV	Voltage(V)	Current(A)	Watt(W)	A/㎠	W/㎠	Cell(℃)	An_Bufferheater(℃)	An_LineHeater(℃)	An_Separator(℃)	Ca_Bufferheater(℃)	Ca_Lineheater(℃)	Ca_Separator(℃)	An_Pump(cc/min)	Ca_Pump(cc/min)	An_In Pressure(bar)	An_Out Pressure(bar)	Ca_In Pressure(bar)	Ca_Out Pressure(bar)	H2 Sensor(ppm)	Tank Temp(℃)	Cell (V) 1
2023-12-15 11:56:08	00:00:05	Charge/CC	1.35	0.049	0	0	0	0	70.3	52.4	50	23.1	55.3	49.9	22.5	10	10	0.05	0	0.1	0.04	200	18.3
2023-12-15 11:56:09	00:00:06	Charge/CC	1.35	0.049	0	0	0	0	70.3	52.4	50	23.1	55.3	49.9	22.5	10	10	0	0	0.06	0.03	201	18.3
2023-12-15 11:56:10	00:00:07	Charge/CC	1.35	0.049	0	0	0	0	69.3	52.6	50	23.1	55.3	49.9	22.5	10	10	0	0	0.06	0.03	201	18.2
2023-12-15 11:56:11	00:00:08	Charge/CC	1.35	0.042	0	0	0	0	69.3	52.6	50	23.1	55.2	49.9	22.5	10	10	0	0	0.06	0.03	201	18.2
2023-12-15 11:56:12	00:00:09	Charge/CC	1.35	1.35	0.094	0.126	0.019	0.025	69.3	52.6	50	23.1	55.2	49.9	22.5	10	10	0	0	0.05	0.03	201	18.2
2023-12-15 11:56:13	00:00:10	Charge/CC	1.35	1.35	0	0	0	0	68.2	52.6	50	23.1	55.2	49.9	22.5	10	10	0	0	0.05	0.03	200	18.2
[truncated: 655 more rows]

## Sheet: x-PDB-8-F5-SEBS WE cell
Test Start Time :	2023-12-19 12:56:31
Cell Square :	5
Test Cycle :	4_8
[truncated: 663 more rows]

## Sheet: x-PDB-12-F5-SEBS WE cell
Test Start Time :	2023-12-20 15:19:44
[truncated: 665 more rows]

[truncated: 8 more sheets: FAA WE cell, PiperION WE cell, x-PDB-4-F5-SEBS WE Cell (NiFe), x-PDB-0-F5-SEBS durability, x-PDB-4-F5-SEBS durability-1, x-PDB-4-F5-SEBS durability-2, x-PDB-4-F5-SEBS durability-3, x-PDB-4-F5-SEBS durability-4]
